# Supplementary material for: Chemical Composition and Evaluation of the Biological Properties of the Essential Oil of the Dietary Phytochemical Lippia citriodora
Source: Molecules. 2018 Jan 12;23(1):123. doi: 10.3390/molecules23010123 (PMC6017519; doi:10.3390/molecules23010123)
Supplement: Supplementary file 1 [file molecules-23-00123-s001.xlsx]

## Sheet: S.epiderm.-Lippia citriodora
PlateFormat 96wells		Wells
		A1	A2	A3	A4	A5	A6	A7	A8	A9	A10	A11	A12
		B1	B2	B3	B4	B5	B6	B7	B8	B9	B10	B11	B12
		C1	C2	C3	C4	C5	C6	C7	C8	C9	C10	C11	C12
		D1	D2	D3	D4	D5	D6	D7	D8	D9	D10	D11	D12
		E1	E2	E3	E4	E5	E6	E7	E8	E9	E10	E11	E12
		F1	F2	F3	F4	F5	F6	F7	F8	F9	F10	F11	F12
		G1	G2	G3	G4	G5	G6	G7	G8	G9	G10	G11	G12
		H1	H2	H3	H4	H5	H6	H7	H8	H9	H10	H11	H12
PlateFormat 96wells		Concentration of L. citriodora EO in each well (%v/v) (4 replicates)
		1	0.5	0.25	0.125	0.0625	0.03125	0.015625	0	0.6	0.6	0.6	0.6
		1	0.5	0.25	0.125	0.0625	0.03125	0.015625	0	0.3	0.3	0.3	0.3
		1	0.5	0.25	0.125	0.0625	0.03125	0.015625	0	0.15	0.15	0.15	0.15
		1	0.5	0.26	0.125	0.0625	0.03125	0.015625	0	0.075	0.075	0.075	0.075
		0.8	0.4	0.2	0.1	0.05	0.025	0.0125	0	0.0375	0.0375	0.0375	0.0375
		0.8	0.4	0.2	0.1	0.05	0.025	0.0125	0	0.01875	0.01875	0.01875	0.01875
		0.8	0.4	0.2	0.1	0.05	0.025	0.0125	0	0.009375	0.009375	0.009375	0.009375
		0.8	0.4	0.2	0.1	0.05	0.025	0.0125	0	0.0046875	0.0046875	0.0046875	0.0046875			concentration(%v/v)
PlateFormat 96wells																	1	0.8	0.6	0.5	0.4	0.3	0.25	0.2	0.15	0.125	0.1	0.075	0.0625	0.05	0.0375	0.03125	0.025	0.01875	0.015625	0.0125	0.009375	0.0046875	Control no inoculum no essential oil	Control with inoculum no essential oil
Time(hh:mm:ss)	Temperature(΅C)	absorbance (at 610nm)														Time(hh:mm:ss)	average absorbance /10 min
																00:00	0.1657	0.14845	0.152925	0.168775	0.177575	0.153	0.19965	0.152275	0.19365	0.1718	0.14385	0.149875	0.1531	0.136075	0.14625	0.14145	0.137875	0.1407	0.1367	0.136525	0.138375	0.137225	0.1341	0.134
0:00	37.00	0.1681	0.1874	0.2035	0.1707	0.1528	0.1449	0.1368	0.136	0.1011	0.1605	0.1669	0.1832			10:00	0.15855	0.14415	0.1527	0.160975	0.168025	0.11545	0.19165	0.149825	0.18305	0.164925	0.14075	0.147125	0.147425	0.1334	0.144075	0.1387	0.1353	0.13835	0.133975	0.134075	0.135725	0.135375	0.13245	0.132125
		0.1611	0.1833	0.1953	0.1661	0.1545	0.1377	0.1378	0.1342	0.1441	0.145	0.1588	0.1641			20:00	0.1541	0.140825	0.154875	0.137725	0.1621	0.11145	0.183425	0.14575	0.17435	0.161	0.139475	0.146	0.147	0.1329	0.142225	0.138075	0.134675	0.137475	0.13365	0.133825	0.134725	0.134525	0.1333	0.1332
		0.1583	0.198	0.195	0.1764	0.1527	0.1449	0.1391	0.1337	0.1944	0.193	0.1968	0.1904			30:00	0.15185	0.139425	0.332775	0.231975	0.15515	0.20305	0.175525	0.14415	0.1693	0.15825	0.138875	0.142875	0.145925	0.132625	0.140375	0.137225	0.1347	0.136325	0.1336	0.1341	0.1336	0.133875	0.132125	0.132325
		0.1753	0.1064	0.2048	0.174	0.1524	0.1383	0.1331	0.1325	0.1533	0.1459	0.1483	0.152			40:00	0.150675	0.138225	0.317925	0.2139	0.151725	0.196925	0.1709	0.142925	0.1652	0.156325	0.13855	0.138275	0.1445	0.13275	0.141275	0.1369	0.13485	0.13675	0.13355	0.134275	0.1342	0.1344	0.1325	0.1325
		0.1453	0.1783	0.1539	0.1421	0.1336	0.1386	0.133	0.1362	0.1466	0.1436	0.1483	0.1465			50:00	0.14865	0.1376	0.292675	0.204825	0.148825	0.1896	0.165725	0.142275	0.161725	0.15465	0.13805	0.136925	0.1438	0.132775	0.1404	0.1369	0.13485	0.1363	0.133225	0.134325	0.13405	0.134475	0.133775	0.13375
		0.1447	0.1762	0.1515	0.1406	0.1386	0.1338	0.1342	0.1315	0.1411	0.1366	0.1408	0.1443			1:00:00	0.14815	0.136625	0.280425	0.20205	0.14835	0.1873	0.161125	0.1422	0.1595	0.152625	0.138575	0.137175	0.143525	0.132675	0.141325	0.136675	0.1351	0.137225	0.13345	0.134525	0.13505	0.1355	0.13285	0.132775
		0.1531	0.1782	0.1559	0.1461	0.1382	0.138	0.1429	0.1343	0.1407	0.1373	0.1412	0.1343			1:10:00	0.14685	0.13535	0.270225	0.196575	0.14605	0.181275	0.159975	0.140875	0.1573	0.152075	0.1385	0.135825	0.142975	0.1327	0.1399	0.1368	0.1352	0.136525	0.133475	0.13455	0.13495	0.13475	0.133	0.132975
		0.1507	0.1776	0.1478	0.1466	0.1339	0.1411	0.136	0.134	0.1373	0.135	0.1398	0.1368			1:20:00	0.146125	0.13495	0.266425	0.1906	0.144	0.177325	0.1568	0.14045	0.15565	0.150875	0.1389	0.135325	0.1426	0.132775	0.139525	0.136825	0.135175	0.13655	0.133475	0.13465	0.1343	0.134725	0.1332	0.133225
																1:30:00	0.144975	0.134175	0.250175	0.186375	0.142775	0.1748	0.156325	0.139725	0.1542	0.15005	0.138825	0.134675	0.142675	0.13295	0.139175	0.136725	0.13545	0.13615	0.133625	0.13495	0.134225	0.13475	0.13345	0.13375
10:00	37.00	0.1594	0.1613	0.1983	0.1652	0.1486	0.1403	0.1346	0.1346	0.1611	0.1808	0.1028	0.1661			1:40:00	0.143825	0.13345	0.245475	0.184225	0.142875	0.1743	0.1552	0.1394	0.15365	0.14955	0.1392	0.135175	0.142075	0.133125	0.139625	0.137	0.135375	0.13685	0.133675	0.134925	0.1348	0.1353	0.133625	0.13365
		0.1617	0.1761	0.1846	0.1604	0.1498	0.1355	0.135	0.1324	0.1131	0.1057	0.1111	0.1319			1:50:00	0.14325	0.132725	0.2416	0.17715	0.14125	0.1703	0.153575	0.1392	0.152625	0.14885	0.13925	0.13485	0.14195	0.133	0.13975	0.13675	0.13555	0.136975	0.133825	0.13505	0.13475	0.13535	0.1338	0.133725
		0.1523	0.1454	0.1891	0.1688	0.1446	0.1428	0.1358	0.1321	0.1871	0.181	0.1838	0.1803			2:00:00	0.141875	0.1323	0.23575	0.176525	0.141325	0.16895	0.15215	0.13865	0.1524	0.14775	0.139325	0.135025	0.14155	0.1332	0.1401	0.13725	0.135575	0.1372	0.133925	0.135175	0.135325	0.135775	0.134	0.134025
		0.1608	0.1611	0.1946	0.1653	0.1467	0.1362	0.1305	0.1307	0.1599	0.1419	0.1423	0.1444			2:10:00	0.141025	0.132	0.22835	0.1751	0.140075	0.1658	0.150825	0.13865	0.150875	0.1468	0.139375	0.136425	0.141425	0.1333	0.1396	0.13675	0.13575	0.13705	0.1338	0.13525	0.1349	0.13555	0.134075	0.134025
		0.1411	0.1653	0.1515	0.1393	0.1306	0.1365	0.1309	0.1345	0.1445	0.1429	0.1455	0.1434			2:20:00	0.14035	0.131725	0.22595	0.17325	0.13955	0.164675	0.14975	0.138675	0.149675	0.1462	0.1393	0.13355	0.140975	0.1332	0.139175	0.136775	0.1358	0.13685	0.133925	0.135475	0.1347	0.135375	0.13415	0.134175
		0.1424	0.1678	0.1498	0.1382	0.1361	0.1318	0.1318	0.1297	0.1386	0.1353	0.138	0.1415			2:30:00	0.139525	0.13145	0.219625	0.171	0.138825	0.163625	0.148875	0.13825	0.1492	0.145725	0.13915	0.133575	0.140875	0.133275	0.1393	0.136725	0.13575	0.13715	0.133925	0.1354	0.135025	0.13565	0.13425	0.1342
		0.1476	0.1719	0.1533	0.1429	0.135	0.1353	0.1405	0.1323	0.1377	0.1353	0.1383	0.1316			2:40:00	0.139525	0.131175	0.21345	0.16925	0.1384	0.161525	0.14855	0.137975	0.148	0.14595	0.138475	0.133525	0.140825	0.133275	0.139075	0.136775	0.1359	0.137175	0.13405	0.13555	0.135125	0.135675	0.13435	0.13435
		0.1455	0.1671	0.1447	0.1426	0.1319	0.1376	0.1331	0.132	0.1353	0.1341	0.1376	0.1345			2:50:00	0.138575	0.130975	0.207975	0.168	0.1384	0.159775	0.147825	0.137825	0.147925	0.145	0.138	0.132875	0.141275	0.1333	0.13875	0.1368	0.13595	0.137	0.134125	0.135625	0.134825	0.135475	0.1356	0.1356
																3:00:00	0.138575	0.13075	0.2064	0.163875	0.13755	0.158725	0.146475	0.137375	0.147475	0.1461	0.13875	0.133	0.140775	0.133375	0.138725	0.13675	0.136025	0.137225	0.134225	0.1357	0.135225	0.135925	0.134525	0.13455
20:00	37.00	0.1508	0.1316	0.1829	0.1607	0.1479	0.1407	0.1341	0.1352	0.1691	0.1669	0.1664	0.1171			3:10:00	0.137875	0.130575	0.203575	0.161825	0.13735	0.157575	0.146425	0.1373	0.146525	0.14465	0.137325	0.13285	0.140525	0.133425	0.139	0.13675	0.136025	0.137125	0.1342	0.135775	0.13515	0.13595	0.135775	0.1358
		0.1608	0.1415	0.1824	0.1553	0.1469	0.1364	0.1348	0.1335	0.1076	0.1041	0.1148	0.1193			3:20:00	0.137825	0.130325	0.20125	0.161225	0.137	0.1569	0.14565	0.137525	0.1465	0.144175	0.137025	0.135	0.140725	0.1333	0.138975	0.1368	0.136025	0.137425	0.134125	0.13575	0.135475	0.1364	0.1347	0.134675
		0.151	0.1307	0.1851	0.1655	0.146	0.1407	0.1352	0.1328	0.1757	0.1724	0.1748	0.1745			3:30:00	0.1374	0.130175	0.197425	0.159125	0.1372	0.155575	0.1451	0.137	0.1456	0.1441	0.136825	0.136025	0.140325	0.133375	0.138875	0.13695	0.136	0.137325	0.13405	0.13585	0.135225	0.136075	0.134775	0.134825
		0.1538	0.1471	0.1833	0.1625	0.1472	0.1345	0.1305	0.1317	0.1584	0.1391	0.1386	0.1479			3:40:00	0.137175	0.129925	0.193575	0.15715	0.13655	0.154025	0.143975	0.137025	0.14545	0.143925	0.13685	0.132225	0.14015	0.13345	0.1387	0.13665	0.136075	0.13715	0.134125	0.135925	0.13525	0.136025	0.136075	0.136075
		0.1381	0.1613	0.1476	0.1375	0.1299	0.1358	0.1307	0.1359	0.1435	0.1384	0.1435	0.1435			3:50:00	0.1368	0.12995	0.1919	0.156825	0.1364	0.152975	0.143875	0.13685	0.144825	0.143425	0.13675	0.132075	0.14015	0.1336	0.138425	0.136575	0.1361	0.13685	0.134275	0.135975	0.1351	0.13585	0.134875	0.134875
		0.1393	0.1638	0.1452	0.1372	0.1355	0.1311	0.1311	0.1309	0.1374	0.1336	0.1375	0.1414			4:00:00	0.136775	0.129725	0.18715	0.15565	0.1361	0.152275	0.143325	0.136575	0.1451	0.143275	0.136675	0.132425	0.140175	0.1334	0.138625	0.136775	0.13625	0.137325	0.134175	0.136025	0.13525	0.136025	0.135125	0.13495
		0.146	0.1636	0.1485	0.1414	0.1346	0.1349	0.1403	0.1331	0.1367	0.1333	0.1368	0.1321			4:10:00	0.136225	0.129525	0.185475	0.1552	0.136	0.15145	0.142825	0.136525	0.144425	0.143175	0.1367	0.133125	0.13985	0.1335	0.13835	0.136725	0.136175	0.137	0.1343	0.136125	0.135	0.135925	0.135125	0.1351
		0.1399	0.1597	0.1417	0.1418	0.1316	0.1369	0.1332	0.1329	0.1344	0.1319	0.1365	0.1353			4:20:00	0.1365	0.12945	0.1814	0.152975	0.13545	0.15105	0.1427	0.136475	0.1438	0.1427	0.1368	0.132125	0.14115	0.133475	0.138125	0.136675	0.136125	0.137	0.134425	0.136125	0.13495	0.135875	0.135275	0.135
																4:30:00	0.136025	0.1293	0.1817	0.1519	0.135575	0.15	0.1422	0.13615	0.1434	0.142575	0.1366	0.131725	0.14015	0.133475	0.138075	0.136725	0.136175	0.137025	0.134275	0.13615	0.13505	0.135825	0.135225	0.1351
30:00	37.00	0.1474	0.2246	0.1777	0.1555	0.1478	0.1394	0.1346	0.1341	0.3356	0.3385	0.3497	0.3073			4:40:00	0.13585	0.129225	0.1773	0.15125	0.135125	0.14945	0.14155	0.136075	0.1432	0.142275	0.1366	0.132	0.139575	0.133575	0.138175	0.137825	0.1374	0.13695	0.134325	0.1362	0.135025	0.135975	0.136375	0.13635
		0.161	0.243	0.1749	0.153	0.147	0.1358	0.1349	0.1322	0.1912	0.1999	0.2095	0.2116			4:50:00	0.135525	0.129075	0.17565	0.149875	0.1348	0.149025	0.141925	0.136125	0.14295	0.142325	0.136825	0.13155	0.139725	0.133525	0.138125	0.13665	0.136225	0.136875	0.134225	0.1361	0.1351	0.135975	0.135225	0.1352
		0.149	0.2166	0.1794	0.1649	0.144	0.1402	0.1348	0.1316	0.1696	0.166	0.1737	0.1679			5:00:00	0.135725	0.1289	0.17325	0.1498	0.134825	0.1482	0.141625	0.136225	0.1429	0.14245	0.136725	0.13165	0.14005	0.1336	0.13815	0.136725	0.136225	0.137	0.1344	0.136225	0.13515	0.135975	0.135275	0.1352
		0.15	0.2437	0.1701	0.1596	0.1449	0.1335	0.1301	0.1306	0.1435	0.1373	0.1412	0.1495			5:10:00	0.13525	0.1289	0.17195	0.1484	0.13505	0.14775	0.140725	0.1359	0.142775	0.142025	0.1365	0.1318	0.1397	0.133525	0.138375	0.136875	0.136225	0.1372	0.1341	0.136325	0.13535	0.136225	0.1352	0.135225
		0.1368	0.1532	0.146	0.1374	0.1297	0.1361	0.1307	0.1354	0.1414	0.1379	0.1413	0.1409			5:20:00	0.135275	0.128725	0.171525	0.148075	0.135	0.14685	0.1407	0.136025	0.1424	0.14185	0.136575	0.13145	0.13945	0.133475	0.137925	0.137375	0.13625	0.137	0.1343	0.136225	0.135075	0.135975	0.1354	0.1353
		0.1387	0.1567	0.1428	0.1366	0.1357	0.1312	0.1312	0.1299	0.136	0.1331	0.1363	0.1399			5:30:00	0.135	0.1286	0.170025	0.146825	0.134625	0.146675	0.140475	0.1355	0.14295	0.141625	0.136525	0.1338	0.139375	0.133425	0.137575	0.1374	0.136275	0.136675	0.13445	0.136225	0.1347	0.135825	0.13545	0.135325
		0.1446	0.156	0.1474	0.1406	0.134	0.1346	0.1402	0.1321	0.1352	0.1333	0.1353	0.1306			5:40:00	0.13505	0.128475	0.16815	0.146725	0.1342	0.14625	0.140075	0.13545	0.143525	0.1417	0.1365	0.131675	0.13945	0.1335	0.138075	0.1388	0.137475	0.137	0.134475	0.136275	0.135125	0.13595	0.1354	0.135375
		0.1376	0.1547	0.1404	0.1409	0.1311	0.1369	0.1343	0.1319	0.1337	0.1322	0.1354	0.1342			5:50:00	0.134725	0.12845	0.16885	0.146175	0.1344	0.1459	0.139925	0.1362	0.14315	0.14115	0.136425	0.13145	0.13965	0.13355	0.138075	0.139075	0.13745	0.137025	0.134325	0.1364	0.135025	0.136	0.135325	0.135375
																6:00:00	0.191025	0.133425	0.165625	0.1451	0.13385	0.146075	0.1397	0.135425	0.1424	0.141225	0.136525	0.1313	0.1392	0.13355	0.1379	0.13785	0.1362	0.136875	0.1344	0.1364	0.1351	0.136025	0.135425	0.135375
40:00	37.00	0.145	0.2162	0.1701	0.1547	0.1469	0.1396	0.1342	0.1345	0.314	0.3433	0.3287	0.2857			6:10:00	0.19355	0.13355	0.164075	0.144375	0.13395	0.14535	0.139525	0.13545	0.1419	0.140875	0.1365	0.1315	0.13905	0.133475	0.137875	0.136525	0.136175	0.13685	0.134275	0.136475	0.135025	0.136125	0.135425	0.135525
		0.1612	0.2133	0.1729	0.1546	0.1454	0.1354	0.1347	0.1324	0.1838	0.194	0.1979	0.212			6:20:00	0.188025	0.133525	0.1631	0.144425	0.13365	0.14475	0.13935	0.135425	0.141475	0.140975	0.136575	0.13105	0.139225	0.133525	0.13745	0.137525	0.13625	0.13665	0.13425	0.136475	0.134675	0.135775	0.135525	0.1355
		0.1481	0.2128	0.1718	0.1624	0.1428	0.14	0.1355	0.1321	0.1652	0.1627	0.1676	0.1653			6:30:00	0.188525	0.132425	0.1626	0.14375	0.13355	0.144625	0.1393	0.135325	0.141225	0.1409	0.1365	0.131175	0.139075	0.133625	0.13785	0.138675	0.137425	0.13695	0.134375	0.136525	0.13505	0.136125	0.135475	0.1355
		0.1484	0.2133	0.1688	0.1536	0.1429	0.1326	0.1298	0.131	0.1408	0.1353	0.1359	0.1411			6:40:00	0.188575	0.13275	0.160275	0.143575	0.133175	0.143775	0.139125	0.13585	0.14115	0.140575	0.1366	0.13095	0.13905	0.133575	0.13755	0.137775	0.136275	0.136675	0.13435	0.136525	0.134775	0.1358	0.135525	0.135675
		0.1351	0.1545	0.1448	0.1371	0.1299	0.1363	0.131	0.1354	0.1424	0.1386	0.1426	0.1415			6:50:00	0.182725	0.13195	0.160725	0.14355	0.132925	0.144025	0.13885	0.135475	0.141125	0.140475	0.136575	0.13205	0.139475	0.13365	0.137975	0.13785	0.136275	0.1369	0.134475	0.136525	0.135	0.136075	0.13555	0.135575
		0.1376	0.1502	0.1426	0.1357	0.1357	0.1313	0.1314	0.1301	0.1355	0.1331	0.1374	0.141			7:00:00	0.182575	0.1318	0.158975	0.14245	0.132925	0.143575	0.138825	0.135	0.14075	0.140625	0.136525	0.131075	0.138975	0.133575	0.137925	0.13775	0.136275	0.1368	0.134475	0.13665	0.135125	0.136075	0.1355	0.135775
		0.1435	0.1507	0.1453	0.14	0.1347	0.1348	0.1405	0.1324	0.135	0.1332	0.1367	0.1319			7:10:00	0.1841	0.1317	0.157675	0.14205	0.13285	0.1432	0.138625	0.13555	0.140475	0.140425	0.1367	0.134175	0.13905	0.13355	0.1376	0.137675	0.13625	0.136575	0.13435	0.13665	0.13475	0.1359	0.135525	0.135675
		0.1367	0.1515	0.139	0.1414	0.1307	0.137	0.1342	0.1321	0.1336	0.1321	0.1367	0.1352			7:20:00	0.17865	0.13165	0.15735	0.1413	0.1331	0.143075	0.138475	0.1356	0.140025	0.1403	0.136675	0.131425	0.13875	0.13355	0.1376	0.137775	0.13625	0.136625	0.1344	0.136775	0.13475	0.13595	0.13555	0.1358
																7:30:00	0.17845	0.1312	0.15735	0.141075	0.132675	0.1431	0.1383	0.135475	0.14075	0.140325	0.136675	0.1315	0.1387	0.13365	0.138525	0.13755	0.1364	0.137325	0.134475	0.136825	0.13535	0.136575	0.136725	0.13705
50:00	37.00	0.1441	0.2088	0.1699	0.1535	0.1462	0.1395	0.1345	0.1355	0.2973	0.3032	0.2981	0.2721			7:40:00	0.17725	0.131275	0.15645	0.140875	0.132575	0.1429	0.138225	0.135275	0.140675	0.140225	0.1369	0.131375	0.138775	0.133625	0.138425	0.137575	0.13635	0.13735	0.1344	0.136875	0.1354	0.1365	0.13565	0.13605
		0.1587	0.2071	0.1683	0.1524	0.1448	0.1347	0.1346	0.134	0.1786	0.1857	0.1921	0.202			7:50:00	0.17635	0.13185	0.155025	0.1404	0.132825	0.1423	0.138225	0.135525	0.14	0.140225	0.1369	0.131225	0.13895	0.13365	0.13835	0.1376	0.13625	0.137025	0.134525	0.137125	0.13525	0.1363	0.135725	0.13625
		0.1456	0.1997	0.1644	0.158	0.142	0.1397	0.1344	0.1333	0.1634	0.1608	0.1631	0.1596			8:00:00	0.1761	0.13085	0.154675	0.140175	0.132425	0.142125	0.1379	0.135525	0.140175	0.1402	0.137175	0.13135	0.1391	0.13365	0.138775	0.1377	0.13635	0.137075	0.13465	0.1372	0.13525	0.1363	0.135675	0.1363
		0.1462	0.2037	0.1603	0.1547	0.1422	0.1337	0.1294	0.1323	0.1389	0.134	0.134	0.1408			8:10:00	0.173725	0.13065	0.153425	0.139625	0.132375	0.14175	0.1377	0.135725	0.1402	0.140025	0.13725	0.131375	0.139325	0.13365	0.138675	0.137725	0.13635	0.13705	0.1359	0.138675	0.135275	0.136475	0.1356	0.13655
		0.1344	0.1494	0.1451	0.1363	0.1301	0.1363	0.1314	0.1363	0.1424	0.1374	0.1408	0.141			8:20:00	0.172875	0.130275	0.1547	0.139625	0.132175	0.142175	0.137625	0.134825	0.1406	0.140175	0.1376	0.13205	0.139075	0.133925	0.139725	0.1378	0.136475	0.1378	0.134725	0.137575	0.136075	0.137025	0.1357	0.13685
		0.1369	0.1474	0.1419	0.136	0.1358	0.1313	0.1316	0.1314	0.136	0.1328	0.136	0.1404			8:30:00	0.1716	0.130075	0.152775	0.139275	0.132025	0.141475	0.137475	0.13515	0.13995	0.14015	0.1379	0.133075	0.1392	0.133825	0.1397	0.138	0.136575	0.13725	0.134975	0.13795	0.135625	0.13665	0.135675	0.137125
		0.1426	0.1483	0.1445	0.1396	0.1345	0.1349	0.1405	0.1338	0.135	0.1336	0.1356	0.132			8:40:00	0.168925	0.13035	0.153	0.138975	0.132175	0.141925	0.137325	0.1347	0.140625	0.140225	0.138425	0.132525	0.139275	0.13395	0.141075	0.13795	0.13665	0.13795	0.135125	0.13825	0.136425	0.137325	0.1368	0.13885
		0.1365	0.1502	0.1376	0.1403	0.1307	0.1369	0.1338	0.1335	0.1341	0.1322	0.1356	0.136			8:50:00	0.1683	0.13025	0.1521	0.13885	0.131775	0.14145	0.137225	0.13525	0.14055	0.1402	0.1388	0.13255	0.139575	0.134175	0.1413	0.138	0.1368	0.1379	0.135475	0.138775	0.13635	0.13725	0.1357	0.13815
																9:00:00	0.1693	0.130025	0.1513	0.139075	0.1318	0.14115	0.137125	0.135075	0.140625	0.140125	0.1395	0.134125	0.13955	0.1343	0.141975	0.138375	0.13705	0.137975	0.135725	0.139225	0.1367	0.137575	0.135625	0.138925
1:00:00	37.00	0.1458	0.2056	0.1668	0.1535	0.1459	0.1392	0.1343	0.1348	0.2774	0.292	0.2923	0.26			9:10:00	0.167225	0.129575	0.151175	0.138475	0.131875	0.141325	0.1372	0.1351	0.1408	0.140175	0.140025	0.132975	0.139875	0.1345	0.14315	0.1387	0.137325	0.138225	0.1361	0.13985	0.137125	0.1378	0.136775	0.141
		0.1575	0.2039	0.1616	0.1497	0.145	0.1348	0.135	0.1328	0.1773	0.1828	0.1885	0.2006			9:20:00	0.166625	0.1296	0.150325	0.138325	0.13175	0.141	0.137025	0.135275	0.1414	0.1402	0.141275	0.13355	0.140425	0.134875	0.14435	0.138975	0.137575	0.13855	0.13665	0.14065	0.137625	0.138	0.136925	0.142225
		0.1438	0.1991	0.1605	0.155	0.1417	0.1398	0.1348	0.1326	0.1601	0.159	0.1629	0.156			9:30:00	0.16775	0.1299	0.1503	0.138175	0.1317	0.140425	0.137025	0.1353	0.141225	0.14025	0.142225	0.13365	0.140875	0.135425	0.145825	0.13925	0.138	0.138575	0.137425	0.141575	0.1381	0.138325	0.1357	0.142375
		0.1455	0.1996	0.1556	0.1523	0.1415	0.1329	0.1297	0.1312	0.1403	0.1354	0.1348	0.1382			9:40:00	0.16515	0.129925	0.14935	0.1378	0.131725	0.14075	0.136725	0.1357	0.141675	0.1403	0.14355	0.134425	0.1415	0.13575	0.14765	0.139975	0.138575	0.139	0.1383	0.142925	0.138875	0.13915	0.136775	0.14535
		0.1338	0.15	0.1435	0.1362	0.1299	0.1362	0.1317	0.1351	0.1433	0.139	0.1421	0.1409			9:50:00	0.163575	0.129275	0.149125	0.1377	0.131375	0.14045	0.136675	0.135725	0.142775	0.14055	0.1452	0.136825	0.14235	0.13655	0.1501	0.1419	0.140475	0.13975	0.1407	0.14575	0.140325	0.14	0.13685	0.14745
		0.1359	0.1462	0.1415	0.1384	0.1359	0.1319	0.1319	0.1304	0.137	0.1341	0.1369	0.1409			10:00:00	0.16375	0.128925	0.1492	0.137475	0.131425	0.14115	0.13665	0.13595	0.1444	0.140625	0.147	0.1372	0.1436	0.137325	0.153025	0.14165	0.140025	0.141125	0.140975	0.14605	0.142075	0.141575	0.136825	0.15005
		0.1407	0.1465	0.1448	0.1399	0.1342	0.1351	0.1409	0.133	0.1363	0.1349	0.137	0.132			10:10:00	0.161625	0.12885	0.148825	0.1373	0.131525	0.14065	0.136425	0.136375	0.144875	0.140625	0.14895	0.1385	0.1441	0.1385	0.155925	0.143725	0.142325	0.141725	0.142775	0.1483	0.14345	0.142475	0.1368	0.153075
		0.1361	0.1507	0.139	0.1398	0.1307	0.1372	0.1336	0.1326	0.1353	0.1338	0.1369	0.136			10:20:00	0.16225	0.1289	0.14885	0.13675	0.13145	0.14135	0.1367	0.136575	0.146375	0.14125	0.15135	0.14155	0.145225	0.13985	0.15965	0.145525	0.143825	0.143075	0.14525	0.1502	0.1454	0.144125	0.136875	0.156775
																10:30:00	0.159725	0.128625	0.1471	0.136875	0.131175	0.14015	0.136225	0.137325	0.14745	0.141475	0.153775	0.1419	0.146175	0.141625	0.162375	0.147475	0.1455	0.14375	0.148025	0.15335	0.147175	0.145275	0.135625	0.1594
1:10:00	37.00	0.1449	0.199	0.1667	0.1529	0.1452	0.1395	0.1347	0.1349	0.2652	0.286	0.2791	0.2506			10:40:00	0.160975	0.12855	0.1474	0.1368	0.1313	0.14015	0.13625	0.137675	0.149275	0.141925	0.15685	0.14505	0.148	0.14355	0.1665	0.1498	0.147625	0.14535	0.1528	0.157075	0.149425	0.147425	0.136825	0.16535
		0.1554	0.1967	0.1597	0.149	0.144	0.1348	0.1348	0.1331	0.1753	0.1764	0.1798	0.1936			10:50:00	0.1585	0.1286	0.1467	0.136275	0.1312	0.139875	0.136225	0.138625	0.150425	0.14245	0.1595	0.146375	0.14895	0.14605	0.1698	0.1528	0.150375	0.147275	0.15725	0.160325	0.152375	0.150025	0.136825	0.170225
		0.1431	0.196	0.1578	0.1549	0.1412	0.1398	0.1353	0.1327	0.1559	0.1546	0.1606	0.1581			11:00:00	0.160125	0.128825	0.147775	0.136275	0.13105	0.14045	0.13605	0.1397	0.153625	0.1445	0.16465	0.154275	0.150975	0.148925	0.175325	0.156475	0.15375	0.15005	0.162525	0.164525	0.1558	0.153625	0.136925	0.1768
		0.144	0.1946	0.1557	0.1515	0.1415	0.1331	0.1291	0.1313	0.1394	0.1325	0.1343	0.1371			11:10:00	0.157725	0.1282	0.14625	0.13615	0.131075	0.140175	0.136175	0.139975	0.155625	0.1451	0.167725	0.1556	0.153075	0.153725	0.17955	0.1618	0.157725	0.152725	0.168975	0.1688	0.159375	0.1575	0.135875	0.181825
		0.1332	0.1445	0.1429	0.136	0.1302	0.1364	0.1318	0.1353	0.1408	0.1374	0.142	0.1394			11:20:00	0.1587	0.1282	0.146425	0.13585	0.130975	0.14	0.135925	0.142125	0.1607	0.1466	0.172525	0.1614	0.154125	0.15665	0.186025	0.168825	0.162975	0.1562	0.1763	0.174425	0.163375	0.162275	0.13765	0.19165
		0.1357	0.1456	0.1405	0.1396	0.1356	0.1319	0.132	0.1306	0.136	0.133	0.1374	0.1397			11:30:00	0.156725	0.128	0.146225	0.13535	0.13095	0.140275	0.13585	0.1441	0.164875	0.147725	0.177125	0.169625	0.156125	0.16295	0.192125	0.177825	0.16895	0.1606	0.185225	0.181425	0.1682	0.168325	0.138525	0.200025
		0.1391	0.1447	0.1445	0.1391	0.1343	0.1354	0.141	0.1331	0.138	0.1337	0.137	0.1311			11:40:00	0.15625	0.12795	0.1467	0.1351	0.130975	0.140325	0.136	0.14545	0.168125	0.1497	0.181675	0.18	0.158125	0.168375	0.1981	0.1891	0.176275	0.165225	0.1954	0.188025	0.173075	0.17535	0.1398	0.209625
		0.1334	0.1494	0.1356	0.1393	0.1307	0.1371	0.1334	0.1329	0.1341	0.1331	0.137	0.1348			11:50:00	0.15585	0.12795	0.145125	0.135225	0.1308	0.139875	0.1372	0.14965	0.173775	0.15185	0.18745	0.188125	0.1599	0.17525	0.204675	0.20185	0.18495	0.1706	0.2072	0.1973	0.17845	0.1837	0.139625	0.2192
																12:00:00	0.154825	0.12775	0.145975	0.1347	0.1308	0.13985	0.135925	0.151575	0.180375	0.15365	0.19195	0.201	0.162025	0.1825	0.21155	0.215325	0.1947	0.177075	0.22035	0.20645	0.1851	0.195025	0.139	0.230525
1:20:00	37.00	0.1438	0.1956	0.1645	0.1513	0.145	0.1397	0.1348	0.1351	0.2639	0.2771	0.2782	0.2465			12:10:00	0.15535	0.127625	0.14535	0.134775	0.130875	0.14	0.137125	0.156375	0.186825	0.157525	0.20035	0.214525	0.163575	0.19115	0.21895	0.2283	0.2055	0.1846	0.235225	0.2183	0.1929	0.2087	0.1386	0.241275
		0.1538	0.1929	0.156	0.1478	0.1439	0.1346	0.1349	0.1332	0.1701	0.1715	0.1763	0.1914			12:20:00	0.1541	0.12765	0.146325	0.134675	0.130975	0.140025	0.1359	0.159575	0.1941	0.161525	0.208125	0.22235	0.166525	0.200375	0.226525	0.241225	0.217325	0.192725	0.25035	0.230675	0.201625	0.22565	0.138475	0.25455
		0.1423	0.1898	0.1546	0.1541	0.141	0.1401	0.1349	0.1328	0.1542	0.1537	0.1567	0.158			12:30:00	0.15475	0.128	0.14505	0.134675	0.1309	0.139825	0.135875	0.16405	0.203475	0.166075	0.217725	0.240425	0.169225	0.210525	0.2355	0.25385	0.22905	0.20225	0.2667	0.2458	0.211725	0.24555	0.138475	0.267
		0.1446	0.1841	0.1521	0.1503	0.1405	0.1329	0.1293	0.1317	0.1393	0.1321	0.1321	0.1378			12:40:00	0.15465	0.1274	0.14485	0.1347	0.131125	0.139725	0.1359	0.169475	0.21165	0.17155	0.2272	0.2569	0.17295	0.221125	0.244	0.265775	0.241775	0.213875	0.282225	0.262	0.222425	0.2681	0.13795	0.281925
		0.1328	0.1434	0.1424	0.1362	0.1301	0.1367	0.1319	0.1354	0.1407	0.136	0.1403	0.1411			12:50:00	0.153575	0.1276	0.1455	0.1345	0.13115	0.13965	0.136125	0.17555	0.2236	0.177825	0.237875	0.282875	0.176525	0.23375	0.254675	0.278275	0.254925	0.227675	0.298375	0.27985	0.23435	0.290175	0.136425	0.294825
		0.1351	0.1442	0.1402	0.1417	0.1358	0.132	0.1322	0.1308	0.1362	0.1329	0.1361	0.141			13:00:00	0.1524	0.127525	0.144325	0.134525	0.1313	0.13995	0.13595	0.182525	0.23365	0.18495	0.247625	0.300025	0.1816	0.2462	0.265675	0.290975	0.269225	0.245475	0.31345	0.299	0.246875	0.312375	0.1378	0.31145
		0.1391	0.1428	0.1442	0.1384	0.1345	0.1351	0.1412	0.1331	0.1352	0.1339	0.1357	0.1324			13:10:00	0.153025	0.127325	0.1442	0.13465	0.131575	0.13995	0.136075	0.191125	0.248275	0.19215	0.258325	0.331275	0.186925	0.26005	0.279675	0.30125	0.284425	0.266475	0.329625	0.32025	0.260375	0.333675	0.13815	0.327125
		0.1328	0.1456	0.135	0.1393	0.1307	0.1369	0.1333	0.1336	0.1343	0.1326	0.1359	0.1361			13:20:00	0.152375	0.12715	0.143625	0.134	0.13185	0.140225	0.13615	0.1991	0.2615	0.200925	0.268975	0.35435	0.1932	0.274475	0.291275	0.3144	0.300675	0.289875	0.3461	0.34115	0.2741	0.355275	0.13925	0.3445
																13:30:00	0.150775	0.1271	0.1445	0.13385	0.132175	0.143425	0.137375	0.210125	0.273075	0.2083	0.279325	0.379975	0.199025	0.288175	0.30165	0.32495	0.318	0.312525	0.363325	0.362925	0.288575	0.376175	0.1398	0.359675
1:30:00	37.00	0.1423	0.1904	0.1631	0.1505	0.1452	0.1393	0.1349	0.1354	0.2543	0.2416	0.2697	0.2351			13:40:00	0.150975	0.12725	0.14465	0.1341	0.132375	0.140475	0.137575	0.2192	0.297	0.2175	0.292725	0.42095	0.208125	0.30465	0.3183	0.337125	0.335525	0.3355	0.3824	0.385725	0.30335	0.3964	0.139675	0.37975
		0.1523	0.1876	0.1537	0.1477	0.1436	0.1349	0.1351	0.1335	0.1681	0.169	0.174	0.1881			13:50:00	0.15095	0.1268	0.143925	0.13385	0.13275	0.14015	0.136475	0.228925	0.3098	0.225975	0.305225	0.44405	0.217475	0.320975	0.3302	0.349125	0.3548	0.3569	0.402675	0.4083	0.319725	0.41795	0.139325	0.39735
		0.1416	0.1858	0.1548	0.1529	0.1409	0.1401	0.1352	0.133	0.1553	0.1525	0.1552	0.1538			14:00:00	0.1513	0.1271	0.1434	0.1336	0.13315	0.142775	0.136925	0.240725	0.3334	0.2355	0.3197	0.482125	0.2275	0.3388	0.34645	0.361725	0.3739	0.3781	0.42295	0.43265	0.336375	0.437025	0.1389	0.418175
		0.1437	0.1817	0.1537	0.1491	0.141	0.1326	0.1293	0.1319	0.1384	0.1324	0.132	0.1359			14:10:00	0.149725	0.126825	0.143675	0.133575	0.13365	0.140575	0.13835	0.251725	0.346325	0.244675	0.333475	0.5147	0.2382	0.356325	0.3601	0.375275	0.3928	0.396725	0.44295	0.4573	0.3544	0.456825	0.1387	0.43645
		0.1326	0.1422	0.1416	0.1358	0.1304	0.1369	0.132	0.1355	0.1404	0.1363	0.1405	0.1395			14:20:00	0.149175	0.126975	0.1432	0.1334	0.134475	0.141125	0.138925	0.263225	0.368675	0.254875	0.34865	0.55765	0.24975	0.375925	0.379675	0.390675	0.413125	0.417325	0.463625	0.483275	0.3731	0.4746	0.138875	0.460075
		0.1352	0.1428	0.1395	0.1417	0.1357	0.132	0.1324	0.1321	0.1361	0.133	0.1357	0.1398			14:30:00	0.14915	0.12665	0.14395	0.133375	0.135175	0.141025	0.138225	0.272725	0.3873	0.26435	0.3636	0.5958	0.262925	0.39755	0.395475	0.405325	0.432825	0.435125	0.484125	0.507575	0.391775	0.49375	0.136875	0.478075
		0.1375	0.1412	0.1431	0.1382	0.1347	0.1354	0.1417	0.1335	0.1354	0.134	0.136	0.1315			14:40:00	0.1496	0.126675	0.143125	0.133275	0.136175	0.1443	0.140375	0.288975	0.41185	0.275225	0.379925	0.636	0.27665	0.41965	0.4154	0.421975	0.453025	0.453975	0.506675	0.53205	0.412125	0.512075	0.13805	0.502575
		0.1314	0.1449	0.1347	0.1396	0.131	0.1375	0.1337	0.1339	0.1347	0.1329	0.1363	0.1351			14:50:00	0.148325	0.126875	0.143025	0.1331	0.13735	0.142175	0.14015	0.301025	0.436075	0.284775	0.3965	0.6754	0.291125	0.441675	0.432975	0.437125	0.474975	0.469525	0.527275	0.555475	0.43255	0.53275	0.13795	0.523
																15:00:00	0.148375	0.126525	0.142925	0.1333	0.139175	0.154325	0.1423	0.316575	0.6144	0.29425	0.413125	0.6999	0.30535	0.46335	0.5695	0.454725	0.496625	0.485925	0.5503	0.577925	0.453675	0.552175	0.13795	0.546275
1:40:00	37.00	0.1405	0.1871	0.1637	0.1506	0.1443	0.1397	0.1347	0.1355	0.246	0.26	0.2462	0.2297			15:10:00	0.14765	0.12645	0.143275	0.132875	0.1407	0.144175	0.1429	0.3319	0.612875	0.30585	0.43275	0.7501	0.32185	0.486325	0.5881	0.473875	0.519625	0.5056	0.571825	0.599775	0.474675	0.571925	0.13805	0.5701
		0.1514	0.1825	0.1544	0.1466	0.1433	0.1349	0.1352	0.1335	0.1707	0.1695	0.172	0.185			15:20:00	0.1472	0.126425	0.1427	0.13295	0.142925	0.14635	0.146	0.348	0.646475	0.31695	0.45365	0.798675	0.338025	0.509075	0.4973	0.4959	0.54745	0.5264	0.5935	0.621175	0.49685	0.592225	0.137975	0.594825
		0.1409	0.1848	0.1537	0.1518	0.1409	0.1402	0.1352	0.1333	0.1532	0.1519	0.153	0.1565			15:30:00	0.147675	0.126325	0.14255	0.1329	0.14565	0.14795	0.1473	0.3631	0.64795	0.327875	0.47455	0.837025	0.3555	0.5322	0.52015	0.5181	0.56925	0.546625	0.615975	0.642175	0.519475	0.612125	0.138	0.618775
		0.1425	0.1825	0.149	0.1492	0.1398	0.1332	0.1296	0.1322	0.1392	0.1322	0.1323	0.137			15:40:00	0.146625	0.126225	0.142825	0.1328	0.14875	0.1503	0.1497	0.377475	0.62575	0.339325	0.494175	0.809425	0.3737	0.556675	0.539725	0.5414	0.5922	0.56705	0.634275	0.6614	0.5417	0.63245	0.13795	0.6428
		0.1319	0.1421	0.1414	0.1356	0.1303	0.1368	0.1322	0.1357	0.1415	0.1363	0.1398	0.1409			15:50:00	0.1462	0.12635	0.1422	0.132825	0.15275	0.1556	0.15405	0.3941	0.67055	0.35185	0.515075	0.8048	0.3931	0.58255	0.5614	0.566475	0.6169	0.590725	0.65615	0.680175	0.564075	0.650725	0.13805	0.6666
		0.1347	0.1427	0.1386	0.1436	0.1363	0.132	0.1324	0.1312	0.1375	0.1331	0.1358	0.141			16:00:00	0.146825	0.126275	0.14255	0.133875	0.1585	0.166575	0.1575	0.40925	0.695925	0.365	0.538225	0.84285	0.414025	0.6092	0.58025	0.591225	0.639275	0.612575	0.672775	0.696975	0.5868	0.6698	0.138025	0.687975
		0.1368	0.1428	0.1423	0.1383	0.1349	0.1353	0.1415	0.1337	0.1367	0.134	0.1362	0.1323			16:10:00	0.14615	0.126575	0.1423	0.132575	0.162675	0.162525	0.161275	0.42385	0.74085	0.37965	0.563375	0.872725	0.43585	0.634475	0.59995	0.61775	0.65955	0.637675	0.693275	0.71395	0.610325	0.687825	0.137925	0.7088
		0.1304	0.1439	0.1353	0.1393	0.131	0.1374	0.1336	0.134	0.1358	0.1329	0.1362	0.1363			16:20:00	0.146275	0.1262	0.141825	0.13255	0.1688	0.167775	0.167175	0.442975	0.7686	0.394025	0.585625	0.910475	0.459325	0.657225	0.61675	0.646275	0.67535	0.66095	0.70755	0.72895	0.633725	0.7052	0.1381	0.727925
																16:30:00	0.146	0.1261	0.1421	0.132775	0.17695	0.1782	0.1726	0.460675	0.782	0.40975	0.61065	0.9434	0.486225	0.67945	0.634825	0.674	0.691225	0.683175	0.722175	0.743225	0.65515	0.721	0.138075	0.74155
1:50:00	37.00	0.1394	0.1822	0.1602	0.1504	0.1436	0.1392	0.135	0.1355	0.2401	0.2535	0.2493	0.2235			16:40:00	0.146025	0.12615	0.1425	0.132575	0.188725	0.18525	0.18	0.485075	0.81215	0.425625	0.63755	0.9772	0.5124	0.699575	0.658725	0.701425	0.706125	0.707175	0.737725	0.756575	0.677025	0.736775	0.138025	0.75765
		0.1519	0.1832	0.1519	0.1457	0.1438	0.1347	0.1354	0.1336	0.1617	0.166	0.1682	0.1853			16:50:00	0.1452	0.12615	0.142875	0.132575	0.2039	0.191675	0.1877	0.50995	0.837925	0.44165	0.66265	0.9456	0.540525	0.72045	0.679325	0.72335	0.7196	0.72535	0.751775	0.769825	0.697275	0.7511	0.137975	0.768325
		0.1397	0.1715	0.1514	0.1511	0.1406	0.1399	0.1351	0.1335	0.1535	0.1498	0.1537	0.1535			17:00:00	0.1457	0.12595	0.142575	0.1324	0.220525	0.20335	0.197275	0.54485	0.84215	0.461275	0.68825	0.9801	0.565925	0.739725	0.70635	0.74415	0.7314	0.74615	0.76545	0.7807	0.717125	0.76275	0.138025	0.78135
		0.142	0.1717	0.1508	0.1482	0.1398	0.1332	0.1298	0.1326	0.1379	0.1318	0.1326	0.1371			17:10:00	0.144875	0.125875	0.14255	0.132525	0.2357	0.2216	0.207125	0.580575	0.874725	0.480225	0.709725	0.93965	0.589675	0.7606	0.7311	0.76065	0.7438	0.760975	0.77825	0.791025	0.732925	0.7737	0.137975	0.7874
		0.131	0.1404	0.141	0.1357	0.1303	0.1369	0.1323	0.1358	0.1406	0.1366	0.1409	0.1409			17:20:00	0.14555	0.126025	0.142775	0.13215	0.2521	0.230925	0.219925	0.618625	0.9028	0.501925	0.7357	0.943225	0.6149	0.7786	0.7614	0.7787	0.759025	0.780425	0.79275	0.800325	0.748125	0.783125	0.13805	0.79715
		0.1344	0.1413	0.139	0.1441	0.1361	0.1324	0.1325	0.1313	0.1363	0.1333	0.1371	0.1412			17:30:00	0.14495	0.12585	0.1438	0.132375	0.26655	0.24785	0.23295	0.65475	0.873225	0.523225	0.7581	0.944875	0.6417	0.796125	0.787475	0.79105	0.772425	0.797125	0.805375	0.8096	0.76055	0.79325	0.13795	0.802
		0.1361	0.1405	0.1419	0.1379	0.1346	0.1355	0.1417	0.1337	0.1354	0.1339	0.1372	0.1325			17:40:00	0.145	0.12595	0.14205	0.13225	0.2815	0.265525	0.248725	0.691875	0.8904	0.5527	0.78465	0.943575	0.669025	0.81055	0.81835	0.80595	0.78655	0.816575	0.818175	0.818625	0.7722	0.803375	0.13795	0.80915
		0.1294	0.1428	0.1349	0.1393	0.131	0.1374	0.1337	0.1341	0.1349	0.1329	0.1373	0.1363			17:50:00	0.144175	0.12585	0.14135	0.132225	0.296125	0.28305	0.265175	0.725275	0.88125	0.585325	0.80675	0.9456	0.69875	0.823325	0.8432	0.821625	0.800275	0.835175	0.829075	0.826825	0.7811	0.8136	0.137925	0.8125
																18:00:00	0.144175	0.1257	0.141075	0.132075	0.310075	0.30845	0.28625	0.7585	0.8765	0.623925	0.829	0.949225	0.72735	0.834325	0.8683	0.839525	0.8148	0.853275	0.83985	0.8351	0.790925	0.822725	0.1381	0.81985
2:00:00	37.00	0.1382	0.1794	0.1599	0.1493	0.1433	0.1398	0.1352	0.1357	0.2334	0.2489	0.2421	0.2186			18:10:00	0.14485	0.1258	0.143	0.13195	0.32445	0.33335	0.3088	0.79395	0.91745	0.65865	0.847075	0.91745	0.753875	0.846575	0.883975	0.8549	0.8285	0.867725	0.84935	0.8426	0.7996	0.8335	0.137925	0.824175
		0.1503	0.1777	0.1506	0.1456	0.143	0.1361	0.1353	0.1338	0.1656	0.1628	0.1656	0.1818			18:20:00	0.144575	0.12565	0.1427	0.131625	0.340875	0.354225	0.3375	0.831525	0.919825	0.697475	0.864575	0.94065	0.781925	0.856325	0.89885	0.87155	0.841675	0.8807	0.858425	0.8502	0.8088	0.842275	0.138	0.832525
		0.1392	0.1771	0.1496	0.1505	0.1403	0.1401	0.1354	0.1337	0.1526	0.1501	0.1518	0.1551			18:30:00	0.14375	0.125725	0.14295	0.13235	0.358525	0.37795	0.3677	0.86505	0.9638	0.73645	0.880925	0.95315	0.811975	0.865725	0.9087	0.884625	0.85215	0.89075	0.865225	0.8568	0.816575	0.85095	0.137875	0.837175
		0.1398	0.1719	0.1485	0.1456	0.1396	0.133	0.1298	0.1328	0.1387	0.1329	0.1317	0.1368			18:40:00	0.143775	0.12555	0.14185	0.132425	0.37685	0.405825	0.4032	0.895925	0.95305	0.7757	0.896925	0.95305	0.8406	0.8739	0.920925	0.89715	0.86155	0.8994	0.871775	0.86315	0.82565	0.8582	0.137925	0.844875
		0.131	0.1402	0.1407	0.1354	0.1306	0.1371	0.1324	0.136	0.1424	0.1378	0.1395	0.1407			18:50:00	0.143275	0.125675	0.143925	0.1322	0.39835	0.429625	0.438925	0.918075	0.9559	0.8063	0.90885	0.9559	0.864475	0.88075	0.930425	0.907675	0.8694	0.906325	0.876875	0.86875	0.833425	0.864975	0.1379	0.849
		0.1342	0.1415	0.1386	0.1449	0.1364	0.1322	0.1327	0.1318	0.1375	0.1344	0.1358	0.1411			19:00:00	0.143525	0.1258	0.142225	0.132525	0.423775	0.4617	0.476925	0.935875	0.956825	0.835925	0.919675	0.956825	0.8833	0.88545	0.9396	0.917	0.877175	0.9132	0.883925	0.8748	0.84275	0.871275	0.138075	0.856
		0.1353	0.1411	0.1415	0.1382	0.1348	0.1355	0.1418	0.1339	0.1367	0.1354	0.1362	0.133			19:10:00	0.1431	0.1254	0.1432	0.132	0.4526	0.4938	0.5139	0.95045	0.959575	0.861275	0.92695	0.959575	0.896725	0.890625	0.946825	0.9246	0.882475	0.918175	0.8894	0.879925	0.851275	0.87705	0.13755	0.86025
		0.1287	0.1425	0.1338	0.1388	0.131	0.1375	0.1338	0.1344	0.136	0.1342	0.1364	0.1365			19:20:00	0.14325	0.125525	0.14225	0.132075	0.483425	0.520725	0.54495	0.94935	0.96295	0.880375	0.933075	0.96295	0.907225	0.8933	0.95145	0.9307	0.888125	0.921925	0.892425	0.884125	0.857975	0.88135	0.13795	0.8651
																19:30:00	0.1431	0.1254	0.14285	0.13215	0.52225	0.556725	0.57355	0.954325	0.962675	0.899275	0.93705	0.962675	0.916175	0.8966	0.9563	0.936075	0.892175	0.9257	0.8965	0.888075	0.864225	0.8855	0.13795	0.869175
2:10:00	37.00	0.1372	0.1786	0.1575	0.1483	0.1434	0.1393	0.1351	0.1358	0.2249	0.2367	0.2343	0.2175			19:40:00	0.14265	0.1254	0.141375	0.131775	0.5644	0.58535	0.59755	0.9579	0.9797	0.9112	0.94065	0.9399	0.921725	0.8991	0.9591	0.9407	0.89595	0.928475	0.89945	0.891625	0.8701	0.888925	0.137975	0.87275
		0.149	0.1718	0.1498	0.1447	0.1431	0.135	0.1354	0.1339	0.1623	0.16	0.1616	0.1793			19:50:00	0.1432	0.12525	0.142125	0.13215	0.6145	0.69285	0.619025	0.9574	0.9833	0.92045	0.942125	0.9392	0.926275	0.90195	0.96005	0.94525	0.899775	0.930775	0.9021	0.894975	0.875225	0.893025	0.1375	0.873925
		0.1391	0.1732	0.1491	0.1495	0.1401	0.1398	0.1351	0.1338	0.1525	0.1481	0.1502	0.1527			20:00:00	0.14265	0.125325	0.141775	0.131775	0.676825	0.733525	0.648925	0.9617	0.9858	0.92985	0.945825	0.9396	0.93015	0.90365	0.95085	0.9494	0.902625	0.933675	0.904525	0.8975	0.87915	0.895425	0.137875	0.877675
		0.1388	0.1768	0.1469	0.1447	0.1391	0.1329	0.1296	0.1328	0.1385	0.1308	0.1305	0.1459			20:10:00	0.142625	0.12515	0.14235	0.131775	0.735025	0.770175	0.682075	0.96155	0.988	0.93395	0.94665	0.9414	0.93225	0.905775	0.955025	0.951975	0.905225	0.935675	0.9066	0.899975	0.883325	0.89885	0.137525	0.877875
		0.1306	0.1398	0.1409	0.1354	0.1306	0.1373	0.1324	0.1361	0.1411	0.1367	0.1399	0.1407			20:20:00	0.1425	0.12515	0.1416	0.131675	0.78515	0.8063	0.72015	0.962775	0.978275	0.939425	0.94885	0.967225	0.93475	0.907	0.957125	0.955575	0.907075	0.9376	0.908825	0.901575	0.88685	0.900625	0.137925	0.880325
		0.1339	0.1396	0.1388	0.1445	0.1364	0.1324	0.1327	0.1316	0.1375	0.1336	0.1358	0.1413			20:30:00	0.1421	0.125125	0.142775	0.13175	0.829475	0.8366	0.75775	0.964125	0.9883	0.941925	0.949975	0.967	0.936325	0.9081	0.9574	0.9581	0.90835	0.939075	0.909575	0.902375	0.888325	0.901975	0.1379	0.87985
		0.1353	0.1397	0.1414	0.1381	0.1347	0.1356	0.1418	0.134	0.1368	0.1341	0.136	0.1327			20:40:00	0.1421	0.12505	0.1427	0.132175	0.813225	0.8994	0.7902	0.9638	0.963375	0.9449	0.9508	0.97225	0.937725	0.908	0.957825	0.96045	0.910275	0.9403	0.911275	0.9035	0.89095	0.90325	0.137575	0.88095
		0.1282	0.1412	0.1335	0.1395	0.1315	0.1377	0.1341	0.1344	0.1362	0.1331	0.1363	0.1366			20:50:00	0.141825	0.12505	0.14245	0.1321	0.840275	0.9115	0.815025	0.96105	0.97185	0.945825	0.95025	0.97185	0.938225	0.910075	0.96555	0.962025	0.911575	0.940225	0.913925	0.904725	0.893475	0.905025	0.13785	0.8799
																21:00:00	0.142075	0.12505	0.143075	0.13195	0.863325	0.931525	0.83265	0.9619	0.9879	0.94675	0.95135	0.9523	0.939	0.911175	0.966	0.96575	0.912625	0.941475	0.914525	0.9048	0.89535	0.906375	0.13795	0.880475
2:20:00	37.00	0.136	0.1759	0.1568	0.1484	0.1431	0.1395	0.1352	0.1358	0.2224	0.2366	0.2348	0.21			21:10:00	0.1418	0.1249	0.14295	0.1319	0.87765	0.95715	0.849525	0.960575	0.988	0.946375	0.950875	0.9538	0.9391	0.911475	0.9638	0.966275	0.913425	0.9411	0.914875	0.905375	0.89595	0.906325	0.137725	0.8784
		0.1492	0.1721	0.1496	0.1454	0.1427	0.1351	0.1356	0.134	0.1617	0.1571	0.1615	0.1784			21:20:00	0.14175	0.124875	0.1417	0.132275	0.89235	0.9292	0.864725	0.962775	0.9873	0.94765	0.951925	0.9571	0.939825	0.9112	0.9647	0.967825	0.9136	0.9414	0.91515	0.9043	0.8963	0.9057	0.1379	0.8791
		0.1387	0.172	0.1467	0.1486	0.1397	0.1397	0.1351	0.1339	0.1506	0.1472	0.1517	0.1492			21:30:00	0.141775	0.125025	0.142225	0.1322	0.899625	0.87195	0.87405	0.9625	0.9864	0.9466	0.951575	0.9594	0.940075	0.911425	0.964375	0.9507	0.9133	0.941825	0.914725	0.9037	0.89615	0.9056	0.13705	0.877525
		0.1375	0.173	0.1459	0.1424	0.1384	0.1328	0.1298	0.1329	0.1374	0.1306	0.1312	0.135			21:40:00	0.141425	0.12485	0.14085	0.13285	0.904775	0.9292	0.88195	0.963125	0.9862	0.94655	0.95255	0.9601	0.9407	0.91125	0.964425	0.951375	0.913725	0.9429	0.9154	0.902875	0.8976	0.906375	0.136925	0.87745
		0.1304	0.1393	0.1406	0.1354	0.1303	0.1374	0.1327	0.1362	0.1401	0.1365	0.1408	0.1393			21:50:00	0.1413	0.124925	0.143125	0.133725	0.910375	0.9292	0.889275	0.962975	0.9862	0.946775	0.952175	0.9603	0.94175	0.912	0.964525	0.9291	0.9291	0.943525	0.9159	0.9024	0.898425	0.907175	0.13765	0.87595
		0.1337	0.1399	0.1385	0.1443	0.1361	0.1325	0.1331	0.1318	0.1367	0.133	0.1372	0.1405			22:00:00	0.1415	0.1249	0.142	0.133425	0.9123	0.9299	0.8913	0.9621	0.9854	0.945825	0.952575	0.9641	0.941875	0.9117	0.9631	0.95135	0.9143	0.943025	0.91585	0.90175	0.8992	0.90715	0.13735	0.874825
		0.1348	0.139	0.1417	0.1381	0.135	0.1355	0.1421	0.1341	0.1357	0.1342	0.1373	0.1316			22:10:00	0.141225	0.124875	0.140175	0.13405	0.91545	0.9299	0.890725	0.962575	0.9832	0.94315	0.9524	0.9631	0.9417	0.9124	0.96215	0.951075	0.913975	0.942775	0.915425	0.90125	0.8985	0.907125	0.1371	0.87235
		0.128	0.14	0.1339	0.1394	0.1314	0.1378	0.134	0.1346	0.1352	0.1331	0.1375	0.1357			22:20:00	0.1409	0.124825	0.140225	0.134875	0.91675	0.929	0.890475	0.96315	0.9836	0.94035	0.952875	0.9658	0.94105	0.91205	0.96215	0.9512	0.913425	0.9432	0.914925	0.89915	0.8983	0.907575	0.138575	0.8706
																22:30:00	0.1416	0.124725	0.1406	0.13545	0.916225	0.929	0.8895	0.9622	0.9835	0.9396	0.95255	0.9669	0.940625	0.912425	0.96195	0.950375	0.91295	0.94395	0.913875	0.8986	0.899175	0.90765	0.139075	0.86915
2:30:00	37.00	0.1357	0.173	0.1564	0.1477	0.1433	0.1394	0.1351	0.1359	0.2183	0.224	0.2273	0.2089			22:40:00	0.141025	0.1246	0.140175	0.136675	0.90785	0.929225	0.88865	0.962125	0.99445	0.9403	0.95235	0.976975	0.9404	0.91205	0.9618	0.95025	0.912325	0.944	0.91375	0.896575	0.899175	0.9074	0.13955	0.86745
		0.148	0.1709	0.1481	0.1448	0.1424	0.135	0.1355	0.1342	0.16	0.1575	0.1608	0.1762			22:50:00	0.141	0.124675	0.140475	0.137925	0.902875	0.929525	0.8859	0.960975	0.9935	0.9375	0.952125	0.97775	0.939975	0.9127	0.960225	0.949325	0.91105	0.943725	0.912225	0.894925	0.8988	0.90645	0.139325	0.865175
		0.1379	0.1677	0.1454	0.148	0.1396	0.14	0.1352	0.1339	0.1501	0.1462	0.1499	0.1506			23:00:00	0.1406	0.124625	0.13985	0.13995	0.903125	0.929275	0.8854	0.960625	0.99165	0.935775	0.952	0.980825	0.939625	0.91225	0.959525	0.948975	0.910225	0.9431	0.912025	0.894075	0.89855	0.9056	0.13945	0.863975
		0.1365	0.1724	0.1456	0.1424	0.1382	0.1325	0.1299	0.133	0.1367	0.1302	0.1318	0.1356			23:10:00	0.141475	0.124525	0.140425	0.14205	0.90075	0.929275	0.8828	0.958475	0.99185	0.935575	0.9509	0.981775	0.9384	0.9133	0.957225	0.948075	0.909875	0.942175	0.91145	0.8937	0.898975	0.90565	0.139125	0.861125
		0.1302	0.1379	0.1399	0.1359	0.1304	0.1374	0.1327	0.1362	0.1393	0.1363	0.1412	0.1404			23:20:00	0.140425	0.124575	0.141	0.14455	0.89965	0.9293	0.88055	0.95725	0.9899	0.9301	0.95075	0.9899	0.93695	0.91265	0.955725	0.947925	0.908075	0.941325	0.910475	0.891375	0.8981	0.903575	0.139325	0.859225
		0.1338	0.139	0.1387	0.1434	0.1364	0.1325	0.1329	0.1318	0.1366	0.1333	0.1372	0.1415			23:30:00	0.140725	0.124525	0.140125	0.147675	0.901425	0.9293	0.881	0.9575	0.9899	0.92825	0.95005	0.954525	0.9363	0.912625	0.954	0.946775	0.907375	0.94085	0.909775	0.89045	0.897325	0.902325	0.139175	0.85745
		0.1345	0.1386	0.1411	0.138	0.135	0.1358	0.1421	0.1342	0.1357	0.1344	0.1371	0.1329			23:40:00	0.1405	0.1245	0.140225	0.1512	0.90005	0.929075	0.880325	0.957425	0.9876	0.928625	0.94995	0.98695	0.93665	0.911	0.95375	0.946375	0.90555	0.94045	0.908425	0.88825	0.895675	0.900025	0.139125	0.85615
		0.1273	0.1398	0.1333	0.1393	0.1313	0.1373	0.1339	0.1346	0.1352	0.1332	0.1376	0.1366			23:50:00	0.14025	0.124475	0.1401	0.155525	0.899125	0.936675	0.879875	0.9583	0.988375	0.925975	0.9494	0.98825	0.935175	0.910675	0.9523	0.94515	0.90445	0.93925	0.907475	0.886625	0.89505	0.89845	0.139	0.853975
																24:00:00	0.1402	0.124525	0.140175	0.16035	0.8992	0.9389	0.880325	0.955725	0.985275	0.926325	0.94815	0.9895	0.9345	0.910125	0.950825	0.944175	0.904275	0.938825	0.90715	0.886775	0.8945	0.897275	0.139125	0.8525
2:40:00	37.00	0.1355	0.1725	0.1554	0.1479	0.1425	0.1393	0.1351	0.1361	0.2144	0.2213	0.2158	0.2023
		0.1481	0.1681	0.1467	0.1443	0.1424	0.1349	0.1358	0.134	0.1601	0.1537	0.1577	0.1746
		0.1377	0.1659	0.1463	0.1483	0.1394	0.1401	0.1352	0.1341	0.1503	0.1449	0.1472	0.1496
		0.1368	0.1705	0.1458	0.1433	0.139	0.1328	0.1301	0.1332	0.1375	0.1304	0.1304	0.1358
		0.1301	0.1376	0.1401	0.1352	0.1306	0.1377	0.1328	0.1363	0.1404	0.136	0.1399	0.14
		0.1332	0.1395	0.1382	0.1418	0.1364	0.1328	0.1329	0.132	0.1376	0.1334	0.1358	0.1419
		0.1343	0.1379	0.1404	0.138	0.1347	0.1356	0.1423	0.1343	0.1371	0.1345	0.1361	0.1328
		0.1271	0.1386	0.1332	0.1389	0.1314	0.1375	0.1342	0.1348	0.1364	0.1332	0.1364	0.1367
2:50:00	37.00	0.1343	0.1677	0.1557	0.1472	0.1431	0.1393	0.1353	0.1371	0.211	0.2077	0.214	0.1992
		0.1471	0.1655	0.1467	0.1435	0.1428	0.1352	0.136	0.1355	0.1573	0.1528	0.157	0.172
		0.1373	0.1705	0.1456	0.1475	0.1392	0.14	0.1352	0.1353	0.1476	0.1457	0.1491	0.1493
		0.1356	0.1683	0.1433	0.1418	0.14	0.1327	0.13	0.1345	0.1366	0.1304	0.1308	0.1337
		0.1298	0.1371	0.1401	0.1357	0.1304	0.1376	0.1328	0.1377	0.1392	0.1361	0.1409	0.1388
		0.1332	0.1388	0.1376	0.1401	0.1365	0.133	0.1331	0.1333	0.1365	0.1337	0.1373	0.1405
		0.1341	0.1389	0.1404	0.1375	0.135	0.1358	0.1424	0.1355	0.1361	0.1344	0.1371	0.1317
		0.1268	0.1388	0.1332	0.1387	0.1313	0.1374	0.1342	0.1359	0.1354	0.1332	0.1377	0.1356
3:00:00	37.00	0.1339	0.1672	0.1546	0.1476	0.1423	0.1397	0.1354	0.1362	0.2057	0.2123	0.2115	0.1961
		0.1475	0.1637	0.1456	0.1453	0.143	0.1349	0.1363	0.1344	0.1567	0.1525	0.1558	0.1699
		0.1373	0.1646	0.1431	0.1483	0.1392	0.1398	0.1351	0.1342	0.1487	0.1445	0.1479	0.1488
		0.1356	0.16	0.1426	0.1432	0.1386	0.1326	0.1301	0.1333	0.1359	0.1301	0.1306	0.1354
		0.1298	0.1369	0.1397	0.1367	0.1304	0.1376	0.133	0.1365	0.1386	0.136	0.1405	0.1398
		0.1328	0.1378	0.137	0.1392	0.1363	0.1329	0.1332	0.1322	0.1365	0.1335	0.1373	0.1416
		0.1338	0.1374	0.1399	0.139	0.135	0.1359	0.1423	0.1345	0.1359	0.1347	0.1374	0.1329
		0.1266	0.1381	0.1329	0.1401	0.1318	0.1377	0.1343	0.135	0.1355	0.1335	0.1379	0.1368
3:10:00	37.00	0.1333	0.1656	0.1537	0.1467	0.1418	0.1394	0.1355	0.1372	0.2032	0.2075	0.21	0.1936
		0.1468	0.1603	0.1455	0.1438	0.1422	0.1352	0.136	0.1356	0.1543	0.152	0.1544	0.1696
		0.1368	0.1624	0.1443	0.1468	0.1395	0.14	0.1352	0.1355	0.1477	0.1443	0.1461	0.148
		0.1346	0.159	0.1422	0.1413	0.1386	0.1324	0.1301	0.1348	0.1359	0.1312	0.1295	0.1348
		0.1294	0.1363	0.1399	0.1354	0.1304	0.1377	0.1332	0.1378	0.1389	0.1374	0.1397	0.14
		0.1328	0.1374	0.1368	0.1372	0.1365	0.1331	0.1332	0.1334	0.1364	0.1346	0.1361	0.1414
		0.1336	0.1374	0.14	0.1378	0.1351	0.1357	0.1424	0.1358	0.1358	0.1358	0.1361	0.1329
		0.1265	0.1383	0.1325	0.1389	0.1317	0.1376	0.1343	0.1362	0.1355	0.1348	0.1366	0.1369
3:20:00	37.00	0.133	0.1654	0.1537	0.1462	0.1432	0.1396	0.1354	0.1363	0.1994	0.2075	0.2077	0.1904
		0.1473	0.1596	0.1447	0.1435	0.1424	0.135	0.1359	0.1346	0.1543	0.15	0.1549	0.1684
		0.1365	0.1621	0.1426	0.1466	0.1393	0.14	0.1352	0.1344	0.1487	0.143	0.1466	0.1477
		0.1345	0.1578	0.1416	0.1404	0.138	0.1326	0.13	0.1335	0.1368	0.1298	0.1308	0.1426
		0.1293	0.1363	0.1393	0.1353	0.1305	0.1378	0.133	0.1366	0.1397	0.1359	0.1406	0.1397
		0.1327	0.1374	0.1385	0.136	0.1363	0.1328	0.1332	0.1323	0.1377	0.1334	0.1371	0.1415
		0.1333	0.137	0.1396	0.1379	0.135	0.1359	0.1424	0.1346	0.1371	0.1346	0.1371	0.1331
		0.126	0.1373	0.1327	0.1389	0.1314	0.1376	0.1344	0.1352	0.1366	0.1336	0.1381	0.1373
3:30:00	37.00	0.133	0.1622	0.1529	0.1461	0.1423	0.1395	0.1353	0.1362	0.1979	0.2046	0.199	0.1882
		0.1462	0.158	0.1441	0.1431	0.1421	0.1355	0.1357	0.1347	0.1533	0.1492	0.152	0.1678
		0.1365	0.1613	0.1427	0.1463	0.1391	0.1398	0.1353	0.1345	0.1474	0.1431	0.1447	0.1472
		0.1339	0.155	0.1407	0.1409	0.1378	0.133	0.1299	0.1337	0.137	0.1297	0.1299	0.1475
		0.1291	0.1359	0.1391	0.1352	0.1306	0.1376	0.1332	0.1367	0.1399	0.1357	0.1397	0.1402
		0.1326	0.1377	0.1367	0.1357	0.1363	0.1329	0.1333	0.1325	0.1385	0.1335	0.1361	0.1412
		0.133	0.1371	0.1395	0.1376	0.1352	0.1359	0.1424	0.1348	0.137	0.1347	0.1362	0.133
		0.126	0.1381	0.1327	0.1388	0.1314	0.1376	0.1345	0.1353	0.1367	0.1334	0.1371	0.1371
3:40:00	37.00	0.1326	0.1606	0.1519	0.1458	0.142	0.1391	0.1354	0.1375	0.1925	0.1965	0.1992	0.1861
		0.1462	0.1579	0.1434	0.1433	0.1417	0.1351	0.1357	0.1359	0.151	0.1475	0.1509	0.1667
		0.1362	0.1593	0.1405	0.146	0.1389	0.1396	0.1354	0.1358	0.1466	0.1426	0.1446	0.148
		0.1337	0.1508	0.1401	0.1406	0.138	0.1328	0.13	0.1351	0.1366	0.1295	0.1289	0.1339
		0.129	0.1354	0.1394	0.1355	0.1304	0.1379	0.1331	0.138	0.1397	0.1359	0.1394	0.1398
		0.1323	0.1369	0.1371	0.1353	0.1365	0.1329	0.1335	0.1337	0.1376	0.1336	0.136	0.1414
		0.1328	0.1367	0.1392	0.1378	0.1351	0.1357	0.1425	0.1361	0.137	0.1347	0.1362	0.1331
		0.1256	0.1372	0.1324	0.1388	0.1318	0.1378	0.1346	0.1365	0.1367	0.1336	0.1367	0.1371
3:50:00	37.00	0.1322	0.1599	0.1524	0.1453	0.142	0.1396	0.1356	0.1363	0.1919	0.2005	0.1961	0.1791
		0.1454	0.157	0.1436	0.1425	0.1418	0.1349	0.1361	0.1347	0.1507	0.1466	0.1508	0.1638
		0.1363	0.1587	0.1398	0.1458	0.1388	0.1395	0.1353	0.1345	0.146	0.1436	0.144	0.1457
		0.1333	0.1517	0.1397	0.1401	0.138	0.1323	0.1301	0.134	0.135	0.131	0.1294	0.1329
		0.1289	0.1354	0.1392	0.1353	0.1305	0.1379	0.1333	0.1369	0.1386	0.1368	0.1395	0.1388
		0.1324	0.1367	0.1365	0.1351	0.1365	0.133	0.1335	0.1325	0.1366	0.1347	0.1362	0.1399
		0.1329	0.1365	0.1391	0.1379	0.1351	0.1358	0.1425	0.1347	0.1359	0.1362	0.1363	0.132
		0.1256	0.137	0.1326	0.1387	0.1323	0.1377	0.1346	0.1354	0.1357	0.1347	0.1369	0.1361
4:00:00	37.00	0.1322	0.158	0.1513	0.1452	0.142	0.1394	0.1353	0.1366	0.1864	0.1923	0.1905	0.1794
		0.1459	0.1536	0.1434	0.1424	0.1417	0.1355	0.136	0.1349	0.1494	0.1467	0.1486	0.1644
		0.1359	0.1568	0.14	0.1456	0.1387	0.1397	0.1353	0.1347	0.1462	0.1439	0.1439	0.1464
		0.1331	0.1542	0.1386	0.1399	0.1383	0.1325	0.1301	0.1343	0.1352	0.1306	0.1288	0.1351
		0.1286	0.1352	0.1388	0.1354	0.1304	0.138	0.1333	0.1368	0.1383	0.1372	0.1394	0.1396
		0.1321	0.1362	0.1367	0.135	0.1365	0.1333	0.1335	0.1326	0.1369	0.135	0.1363	0.1411
		0.1326	0.1364	0.1386	0.1376	0.1351	0.136	0.1428	0.1349	0.1358	0.1359	0.1363	0.133
		0.1256	0.1366	0.1322	0.1387	0.1316	0.1377	0.1345	0.1355	0.1357	0.1346	0.1367	0.1371
4:10:00	37.00	0.1317	0.1574	0.151	0.1451	0.142	0.1398	0.1356	0.1366	0.187	0.1883	0.1909	0.1757
		0.1449	0.1559	0.143	0.1427	0.1414	0.1351	0.1361	0.1348	0.1478	0.1465	0.1482	0.1633
		0.1356	0.155	0.1389	0.1455	0.1384	0.1395	0.1355	0.1347	0.1453	0.1429	0.1438	0.1457
		0.1327	0.1525	0.1384	0.1394	0.1376	0.1325	0.13	0.1344	0.135	0.1307	0.1289	0.1379
		0.1283	0.135	0.1392	0.1354	0.1305	0.138	0.1336	0.1369	0.1384	0.1373	0.1392	0.1385
		0.1321	0.1363	0.1364	0.1352	0.1365	0.1331	0.1335	0.133	0.1368	0.1349	0.1361	0.1402
		0.1324	0.1362	0.1385	0.1375	0.1351	0.1359	0.1427	0.135	0.136	0.136	0.1361	0.1319
		0.1253	0.1365	0.132	0.1387	0.1319	0.1377	0.1347	0.1355	0.1358	0.1347	0.1369	0.1363
4:20:00	37.00	0.1319	0.1545	0.1514	0.1445	0.1466	0.1394	0.1356	0.1367	0.1795	0.1898	0.1819	0.1744
		0.1463	0.154	0.1419	0.1425	0.1417	0.1353	0.1363	0.1348	0.1476	0.144	0.1489	0.1637
		0.1354	0.1544	0.1394	0.1447	0.1389	0.1396	0.1355	0.1348	0.1442	0.1413	0.1428	0.1469
		0.1324	0.149	0.1381	0.1391	0.1374	0.1324	0.1303	0.1348	0.1355	0.1298	0.129	0.1342
		0.1284	0.135	0.139	0.1353	0.1304	0.1379	0.1333	0.1369	0.1384	0.1355	0.1391	0.1395
		0.1318	0.1358	0.1361	0.1354	0.1363	0.133	0.1337	0.1326	0.1366	0.1339	0.136	0.1415
		0.1323	0.1353	0.1387	0.1375	0.1353	0.1359	0.1429	0.135	0.1358	0.1346	0.1363	0.1331
		0.1253	0.1357	0.1321	0.139	0.1319	0.1377	0.1346	0.1355	0.1358	0.1335	0.137	0.1372
4:30:00	37.00	0.1317	0.1546	0.1505	0.1444	0.1418	0.1395	0.1355	0.1367	0.1808	0.1855	0.1863	0.1742
		0.1447	0.1518	0.1417	0.1423	0.1415	0.1354	0.1361	0.1349	0.1481	0.1429	0.1472	0.1618
		0.1354	0.153	0.1388	0.1444	0.1391	0.1395	0.1354	0.1349	0.146	0.1406	0.1426	0.1444
		0.1323	0.1482	0.1378	0.1392	0.1382	0.1325	0.1301	0.1344	0.1361	0.1292	0.1287	0.1329
		0.1282	0.1344	0.1385	0.1353	0.1305	0.1378	0.1334	0.137	0.1392	0.1355	0.1393	0.1383
		0.1317	0.1361	0.1361	0.135	0.1366	0.1331	0.1336	0.1328	0.1378	0.1338	0.1362	0.1403
		0.1321	0.1356	0.1383	0.1374	0.1351	0.136	0.1429	0.135	0.1371	0.1348	0.1363	0.132
		0.1252	0.1362	0.1317	0.1387	0.1317	0.1378	0.1347	0.1356	0.1369	0.1335	0.1367	0.1362
4:40:00	37.00	0.1314	0.1535	0.1498	0.1444	0.1414	0.1404	0.1356	0.1377	0.1777	0.1791	0.1813	0.1711
		0.145	0.1512	0.1415	0.1421	0.1413	0.1365	0.1361	0.1362	0.1458	0.1429	0.1466	0.1625
		0.1351	0.1519	0.1381	0.144	0.1381	0.1408	0.1354	0.1362	0.1443	0.1406	0.1424	0.1455
		0.1319	0.1484	0.1368	0.1386	0.1375	0.1336	0.1302	0.1354	0.1348	0.1295	0.1288	0.1349
		0.1281	0.1347	0.1389	0.1352	0.1305	0.1393	0.1335	0.1383	0.1383	0.1355	0.1391	0.1398
		0.1319	0.1354	0.136	0.1352	0.1367	0.1343	0.1337	0.1341	0.1368	0.1336	0.1362	0.1412
		0.1318	0.1347	0.1379	0.1375	0.1351	0.1371	0.1428	0.1362	0.136	0.1348	0.136	0.1333
		0.1251	0.1357	0.1315	0.1385	0.132	0.1389	0.1348	0.1368	0.136	0.1337	0.1369	0.1373
4:50:00	37.00	0.1313	0.1524	0.15	0.1443	0.1422	0.1395	0.1355	0.1368	0.177	0.1851	0.1747	0.1658
		0.1443	0.1492	0.1415	0.142	0.1412	0.1354	0.1359	0.135	0.1468	0.1428	0.1457	0.1608
		0.1349	0.1511	0.1389	0.1445	0.1387	0.1393	0.1353	0.1349	0.1446	0.1404	0.1419	0.1449
		0.1316	0.1468	0.1373	0.1385	0.1368	0.1324	0.1302	0.1342	0.1357	0.1293	0.1288	0.1324
		0.1277	0.134	0.1384	0.1352	0.1304	0.138	0.1333	0.1371	0.1398	0.1357	0.139	0.138
		0.1317	0.1347	0.1356	0.1362	0.1366	0.1332	0.1336	0.1329	0.138	0.1334	0.1359	0.1402
		0.1319	0.1348	0.1386	0.1374	0.1352	0.136	0.1428	0.1351	0.137	0.1348	0.1363	0.1323
		0.125	0.1357	0.1319	0.1385	0.1319	0.1377	0.1347	0.1357	0.1371	0.1337	0.137	0.1361
5:00:00	37.00	0.1314	0.1523	0.1499	0.1449	0.143	0.1396	0.1357	0.1369	0.1723	0.1797	0.1733	0.1677
		0.1452	0.149	0.1413	0.1418	0.1415	0.1355	0.1362	0.135	0.1456	0.1415	0.1448	0.1609
		0.1347	0.1517	0.1383	0.1443	0.1386	0.1395	0.1355	0.1351	0.1434	0.1402	0.1424	0.1456
		0.1316	0.1462	0.137	0.1388	0.1371	0.1323	0.1302	0.1341	0.1348	0.1293	0.1288	0.1337
		0.1277	0.1341	0.1385	0.1353	0.1306	0.1381	0.1334	0.1371	0.1384	0.1355	0.1392	0.1395
		0.1314	0.1357	0.1361	0.1353	0.1365	0.133	0.1337	0.1329	0.1368	0.1337	0.1362	0.1413
		0.1316	0.1347	0.1384	0.1377	0.1353	0.1359	0.143	0.1351	0.1361	0.135	0.1363	0.1332
		0.1249	0.1348	0.1319	0.1386	0.132	0.1379	0.1348	0.1357	0.1362	0.1336	0.1369	0.1372
5:10:00	37.00	0.131	0.1522	0.1492	0.1442	0.1412	0.139	0.1354	0.1367	0.1721	0.1773	0.1746	0.1638
		0.144	0.1493	0.1403	0.1419	0.1412	0.1352	0.1358	0.1351	0.146	0.141	0.1457	0.1583
		0.1347	0.1462	0.1377	0.1437	0.1387	0.1396	0.1352	0.135	0.1446	0.1398	0.1431	0.1436
		0.1313	0.1459	0.1357	0.1383	0.1377	0.1337	0.13	0.134	0.1358	0.129	0.13	0.1324
		0.1276	0.1357	0.1382	0.135	0.1304	0.1382	0.1335	0.1372	0.1392	0.1359	0.1402	0.1382
		0.1314	0.1348	0.1361	0.1351	0.137	0.1332	0.1338	0.1329	0.1379	0.1339	0.1372	0.1398
		0.1316	0.1348	0.1376	0.1376	0.1351	0.136	0.1431	0.1351	0.1372	0.1348	0.1373	0.1321
		0.125	0.1349	0.1317	0.1383	0.1316	0.1375	0.1349	0.1357	0.137	0.1336	0.1382	0.1361
5:20:00	37.00	0.1312	0.1516	0.1486	0.144	0.1416	0.1397	0.1356	0.137	0.1694	0.1751	0.1785	0.1631
		0.1443	0.1483	0.1405	0.1419	0.1411	0.1354	0.1359	0.1352	0.1439	0.1398	0.1441	0.1596
		0.1344	0.1487	0.1379	0.1434	0.1381	0.1395	0.1355	0.1352	0.1433	0.1394	0.1413	0.1456
		0.1312	0.1437	0.1358	0.1381	0.137	0.1349	0.1302	0.1342	0.1346	0.1289	0.1286	0.1337
		0.1274	0.1356	0.1381	0.1352	0.1304	0.1381	0.1334	0.1371	0.1378	0.1356	0.1391	0.1392
		0.1312	0.1346	0.136	0.135	0.1365	0.1332	0.1338	0.1329	0.1367	0.1339	0.1362	0.1412
		0.1314	0.1346	0.1385	0.1375	0.1351	0.136	0.1429	0.1352	0.1359	0.135	0.1361	0.1333
		0.1249	0.1352	0.1315	0.1386	0.1319	0.1377	0.1348	0.136	0.136	0.1337	0.137	0.1372
5:30:00	37.00	0.1304	0.1494	0.1486	0.1435	0.1414	0.1395	0.136	0.137	0.1674	0.1773	0.172	0.1634
		0.1442	0.1489	0.14	0.1418	0.1407	0.1354	0.1359	0.1355	0.1439	0.1404	0.1444	0.158
		0.1343	0.1452	0.1374	0.1433	0.1382	0.1394	0.1356	0.1351	0.143	0.1392	0.141	0.1486
		0.1311	0.1438	0.1359	0.1379	0.1372	0.1353	0.1303	0.1342	0.1344	0.1289	0.1284	0.1435
		0.1272	0.1349	0.138	0.135	0.1301	0.1382	0.1334	0.1372	0.1379	0.1356	0.1389	0.1379
		0.1312	0.1344	0.1353	0.135	0.1365	0.1332	0.1337	0.133	0.1366	0.1341	0.1358	0.1402
		0.1313	0.1342	0.1373	0.1373	0.135	0.136	0.143	0.1352	0.1361	0.1347	0.136	0.132
		0.1247	0.135	0.1314	0.1388	0.1321	0.1377	0.1348	0.1359	0.1362	0.1337	0.137	0.1364
5:40:00	37.00	0.1305	0.1483	0.1486	0.1438	0.1413	0.1408	0.1358	0.137	0.166	0.1725	0.1713	0.1628
		0.1447	0.1485	0.1396	0.1415	0.1409	0.1368	0.136	0.1351	0.1432	0.1397	0.1429	0.1592
		0.1341	0.1475	0.1369	0.1434	0.1386	0.1408	0.1357	0.1352	0.1431	0.1395	0.141	0.1505
		0.1309	0.1426	0.1352	0.1381	0.137	0.1368	0.1304	0.1343	0.135	0.1294	0.1286	0.1337
		0.1272	0.1331	0.138	0.1352	0.1303	0.1393	0.1333	0.1372	0.138	0.1355	0.139	0.1398
		0.131	0.1339	0.1352	0.135	0.1364	0.1344	0.1338	0.1331	0.1365	0.134	0.1362	0.1413
		0.1311	0.1339	0.1374	0.1373	0.1351	0.1375	0.1432	0.1353	0.1361	0.135	0.1361	0.1333
		0.1246	0.1359	0.1312	0.1385	0.1322	0.1387	0.1348	0.1359	0.1359	0.1336	0.137	0.1373
5:50:00	37.00	0.1307	0.1472	0.1487	0.1431	0.1411	0.1404	0.1356	0.1369	0.1667	0.1743	0.1744	0.16
		0.1435	0.1501	0.1396	0.1412	0.1408	0.1367	0.1361	0.1352	0.1426	0.1396	0.1432	0.1582
		0.134	0.1466	0.137	0.1428	0.138	0.1405	0.1354	0.1351	0.1426	0.1389	0.1422	0.1489
		0.1307	0.1408	0.1344	0.1375	0.1387	0.1387	0.1302	0.1341	0.1342	0.1286	0.1298	0.1332
		0.1271	0.1339	0.1382	0.135	0.1304	0.1394	0.1336	0.1373	0.138	0.1355	0.1404	0.1384
		0.131	0.1342	0.1355	0.1351	0.1366	0.1346	0.1341	0.1331	0.1365	0.1339	0.1375	0.1402
		0.131	0.134	0.1398	0.1372	0.1352	0.137	0.143	0.1352	0.1359	0.1349	0.1372	0.1321
		0.1247	0.1355	0.1313	0.1384	0.132	0.1388	0.1349	0.1359	0.1361	0.1336	0.1381	0.1362
6:00:00	37.00	0.1834	0.1477	0.148	0.1431	0.1411	0.1394	0.1356	0.137	0.1631	0.1702	0.1709	0.1583
		0.1869	0.1459	0.1393	0.141	0.1407	0.1354	0.1361	0.1353	0.1434	0.1399	0.1427	0.1583
		0.2088	0.1457	0.137	0.143	0.1378	0.1393	0.1356	0.1352	0.142	0.1392	0.1409	0.1475
		0.185	0.1411	0.1345	0.1378	0.1372	0.1373	0.1303	0.1342	0.1342	0.129	0.1285	0.1335
		0.1343	0.1332	0.138	0.1352	0.1302	0.1383	0.1336	0.1372	0.138	0.1355	0.1389	0.1392
		0.1336	0.1341	0.1351	0.135	0.1364	0.1331	0.1339	0.1331	0.1365	0.134	0.1359	0.1411
		0.1319	0.1337	0.1372	0.1375	0.1354	0.1358	0.1431	0.1353	0.1359	0.135	0.1362	0.1333
		0.1339	0.1344	0.1314	0.1384	0.1322	0.1376	0.135	0.1359	0.1361	0.1337	0.137	0.1373
6:10:00	37.00	0.1855	0.1463	0.1479	0.1429	0.1412	0.1393	0.1356	0.137	0.1627	0.1679	0.1691	0.1566
		0.1844	0.1453	0.1393	0.1411	0.1405	0.1354	0.1361	0.1353	0.1422	0.1388	0.1433	0.1571
		0.2233	0.1448	0.1365	0.1424	0.138	0.1391	0.1353	0.1352	0.1417	0.1383	0.1415	0.1461
		0.181	0.1411	0.1344	0.1371	0.1365	0.1323	0.1301	0.1342	0.1341	0.1288	0.1296	0.1335
		0.1351	0.1331	0.1379	0.1352	0.1302	0.1382	0.1336	0.1373	0.1379	0.1354	0.1402	0.138
		0.1332	0.1335	0.1352	0.1351	0.1364	0.1331	0.134	0.1331	0.1367	0.1336	0.1371	0.14
		0.1325	0.1333	0.1377	0.1373	0.1354	0.1358	0.1432	0.1357	0.136	0.1349	0.1373	0.1319
		0.1334	0.1359	0.131	0.1384	0.1319	0.1376	0.1351	0.136	0.1362	0.1337	0.1382	0.1364
6:20:00	37.00	0.1762	0.1464	0.1478	0.1432	0.1411	0.1394	0.1356	0.137	0.1607	0.1686	0.1663	0.1568
		0.1842	0.146	0.1385	0.1408	0.1407	0.1354	0.1358	0.1356	0.1415	0.138	0.1432	0.1563
		0.2107	0.1443	0.1366	0.1426	0.138	0.1394	0.1355	0.1353	0.1421	0.1385	0.1401	0.1452
		0.181	0.141	0.1345	0.1373	0.1371	0.1359	0.1301	0.1342	0.1342	0.1289	0.1285	0.1326
		0.135	0.1341	0.138	0.135	0.1302	0.1382	0.1336	0.1373	0.1378	0.1354	0.1389	0.1377
		0.1328	0.1334	0.1348	0.1352	0.1364	0.1332	0.1338	0.1332	0.1367	0.134	0.136	0.1399
		0.133	0.1333	0.1374	0.1375	0.1352	0.1359	0.1432	0.1354	0.1359	0.1348	0.136	0.132
		0.1333	0.1338	0.1315	0.1386	0.1323	0.1377	0.1353	0.1361	0.1361	0.1337	0.1371	0.1362
6:30:00	37.00	0.1854	0.1455	0.1483	0.1427	0.141	0.1403	0.1357	0.137	0.1604	0.1674	0.167	0.1556
		0.1813	0.1454	0.1387	0.1415	0.1403	0.1368	0.136	0.1354	0.1417	0.1385	0.1413	0.157
		0.2098	0.1437	0.1366	0.1424	0.1381	0.1403	0.1355	0.1353	0.1415	0.1383	0.1398	0.1453
		0.1776	0.1404	0.1336	0.137	0.1369	0.1373	0.1303	0.1342	0.1343	0.1289	0.1283	0.1332
		0.1331	0.1332	0.1377	0.1348	0.1304	0.1393	0.1336	0.1373	0.1378	0.1358	0.1388	0.139
		0.1325	0.1339	0.1352	0.1354	0.1364	0.1346	0.134	0.1332	0.1368	0.1338	0.136	0.1412
		0.1316	0.1333	0.1373	0.1373	0.1353	0.137	0.1431	0.1353	0.1361	0.135	0.1359	0.1332
		0.1325	0.1338	0.1311	0.1385	0.1324	0.1388	0.1354	0.1362	0.1362	0.1338	0.1371	0.1374
6:40:00	37.00	0.1783	0.1456	0.1477	0.1428	0.1407	0.1392	0.1357	0.1371	0.1584	0.1647	0.1641	0.1539
		0.1832	0.1438	0.1382	0.1404	0.1404	0.1356	0.1361	0.1354	0.1406	0.1376	0.1412	0.1557
		0.2171	0.1446	0.1363	0.1422	0.1381	0.1394	0.1354	0.1354	0.1416	0.1383	0.1405	0.1442
		0.1757	0.1403	0.1343	0.1369	0.137	0.1369	0.1302	0.1342	0.134	0.1288	0.1285	0.1325
		0.1338	0.1327	0.1378	0.1351	0.1304	0.1382	0.1337	0.1374	0.1377	0.1353	0.1393	0.1379
		0.1325	0.1332	0.1352	0.1354	0.1367	0.1333	0.1338	0.1333	0.1367	0.1341	0.136	0.1399
		0.1318	0.1332	0.1394	0.1374	0.1351	0.1361	0.1433	0.1357	0.1359	0.135	0.1361	0.1321
		0.1329	0.1336	0.131	0.1385	0.1321	0.1375	0.1353	0.1363	0.1361	0.1337	0.1372	0.1362
6:50:00	37.00	0.1699	0.1455	0.1477	0.1424	0.143	0.14	0.1358	0.1371	0.1579	0.165	0.1676	0.1524
		0.1772	0.1449	0.1382	0.1408	0.1404	0.1358	0.1361	0.1354	0.1407	0.1374	0.1418	0.1562
		0.2071	0.1431	0.1359	0.1421	0.1382	0.1393	0.1356	0.1354	0.1414	0.1385	0.141	0.1436
		0.1767	0.1407	0.1336	0.1366	0.1363	0.1363	0.1304	0.1343	0.134	0.1292	0.1295	0.1355
		0.1325	0.1324	0.1378	0.1349	0.1302	0.1382	0.1335	0.1374	0.1378	0.1358	0.1403	0.138
		0.132	0.133	0.1354	0.1359	0.1369	0.1333	0.1339	0.1333	0.1367	0.1338	0.1372	0.1399
		0.131	0.1328	0.1377	0.1374	0.1352	0.136	0.1433	0.1354	0.1359	0.1348	0.1372	0.1321
		0.1323	0.1335	0.131	0.1381	0.1323	0.1376	0.1354	0.1362	0.1362	0.1338	0.1381	0.1362
7:00:00	37.00	0.1725	0.1439	0.1474	0.1423	0.1408	0.1395	0.136	0.137	0.1558	0.1668	0.1601	0.1532
		0.18	0.1438	0.1381	0.141	0.1402	0.1357	0.136	0.1353	0.1401	0.1365	0.1403	0.1574
		0.2037	0.1429	0.1363	0.1423	0.1382	0.1394	0.1356	0.1354	0.1412	0.1381	0.1397	0.144
		0.1741	0.1392	0.1335	0.1369	0.1367	0.1364	0.1303	0.1343	0.1342	0.129	0.128	0.1331
		0.1323	0.1322	0.1374	0.135	0.1303	0.1382	0.1336	0.1373	0.1378	0.136	0.1389	0.139
		0.1319	0.1328	0.1346	0.1358	0.1366	0.1334	0.134	0.1341	0.1365	0.1338	0.1357	0.1412
		0.131	0.1331	0.1371	0.1373	0.1352	0.1359	0.1434	0.1354	0.136	0.1351	0.136	0.1334
		0.132	0.1336	0.1309	0.138	0.1322	0.1376	0.1356	0.1363	0.1364	0.1336	0.137	0.1373
7:10:00	37.00	0.1765	0.1445	0.147	0.1425	0.1412	0.1392	0.1357	0.137	0.1554	0.162	0.1616	0.1517
		0.1775	0.142	0.1381	0.1405	0.1404	0.1357	0.136	0.1354	0.1403	0.1373	0.1403	0.1549
		0.2011	0.1425	0.1356	0.1421	0.1386	0.1391	0.1354	0.1354	0.1412	0.1379	0.1401	0.1427
		0.1813	0.1392	0.1338	0.1366	0.136	0.1367	0.1303	0.1343	0.1342	0.129	0.1355	0.138
		0.1329	0.1323	0.1376	0.1352	0.13	0.1383	0.1336	0.1375	0.1378	0.1359	0.1389	0.1378
		0.1314	0.133	0.1364	0.136	0.1364	0.1332	0.1339	0.1334	0.1367	0.1341	0.1357	0.1398
		0.1306	0.1329	0.1372	0.1373	0.1353	0.136	0.1434	0.1355	0.1361	0.135	0.1359	0.132
		0.1319	0.1332	0.131	0.1383	0.1325	0.1375	0.1357	0.1363	0.1362	0.1338	0.1372	0.1364
7:20:00	37.00	0.1685	0.1434	0.147	0.1425	0.1407	0.1394	0.1357	0.137	0.1539	0.1636	0.1613	0.1506
		0.1773	0.1426	0.138	0.1403	0.1401	0.1359	0.1361	0.1354	0.1401	0.1376	0.14	0.1546
		0.2033	0.1413	0.1358	0.1419	0.1381	0.1392	0.1355	0.1354	0.1409	0.1376	0.1391	0.1425
		0.1655	0.1379	0.1331	0.1365	0.1361	0.1366	0.1303	0.1344	0.134	0.1289	0.1285	0.1343
		0.1318	0.1334	0.1371	0.135	0.1302	0.1382	0.1336	0.1376	0.1376	0.1362	0.1387	0.1379
		0.1316	0.1328	0.1348	0.1361	0.1365	0.1333	0.1341	0.1336	0.1365	0.1343	0.1359	0.1398
		0.1306	0.1327	0.1397	0.1374	0.1352	0.1359	0.1433	0.1355	0.1361	0.135	0.1359	0.132
		0.1326	0.1335	0.1308	0.1382	0.1323	0.1376	0.1361	0.1365	0.1364	0.1339	0.1372	0.1363
7:30:00	37.00	0.1709	0.1435	0.1469	0.1422	0.1408	0.1393	0.136	0.1381	0.1542	0.1637	0.1616	0.1499
		0.1753	0.1414	0.1378	0.1409	0.1399	0.1358	0.1362	0.1365	0.1396	0.1381	0.1406	0.1541
		0.1947	0.1423	0.1354	0.1418	0.1383	0.1392	0.1355	0.1366	0.1408	0.1387	0.1405	0.143
		0.1729	0.1371	0.1331	0.1364	0.1358	0.1359	0.1302	0.1357	0.1342	0.1301	0.1296	0.1321
		0.1317	0.1322	0.1374	0.1349	0.1302	0.1384	0.1336	0.139	0.1376	0.1379	0.1404	0.1382
		0.1313	0.1328	0.1373	0.1364	0.1366	0.1336	0.1341	0.1349	0.1369	0.1353	0.1373	0.1398
		0.1302	0.1324	0.1365	0.1372	0.1353	0.1359	0.1434	0.1366	0.1362	0.1361	0.1371	0.132
		0.1316	0.1333	0.1307	0.1382	0.1325	0.1377	0.1362	0.1377	0.1365	0.1348	0.1385	0.1365
7:40:00	37.00	0.1689	0.1435	0.1468	0.1422	0.1406	0.1393	0.1357	0.1372	0.1534	0.1599	0.1596	0.1529
		0.1745	0.1424	0.1377	0.1406	0.1401	0.1359	0.1362	0.1354	0.1392	0.1363	0.1405	0.1556
		0.1961	0.1407	0.1354	0.1417	0.1386	0.1391	0.1355	0.1355	0.1408	0.1375	0.1405	0.1439
		0.1695	0.1369	0.133	0.1364	0.1358	0.136	0.1302	0.1345	0.1339	0.1289	0.1293	0.1334
		0.1316	0.1323	0.1373	0.1351	0.1303	0.1384	0.1337	0.1379	0.1375	0.137	0.1403	0.1389
		0.1314	0.1326	0.1356	0.1369	0.1365	0.1335	0.1342	0.1339	0.1368	0.1342	0.1371	0.1413
		0.1307	0.1322	0.1374	0.1375	0.1353	0.1359	0.1432	0.1357	0.1363	0.1351	0.137	0.1332
		0.1314	0.1332	0.1308	0.1381	0.1324	0.1376	0.1364	0.1367	0.1364	0.1338	0.1382	0.1376
7:50:00	37.00	0.1684	0.1428	0.147	0.1424	0.1406	0.1393	0.1358	0.1371	0.1523	0.1598	0.159	0.149
		0.1719	0.1409	0.137	0.1406	0.1399	0.1359	0.1363	0.1355	0.139	0.1361	0.1401	0.154
		0.1975	0.1413	0.1353	0.1416	0.1389	0.1392	0.1356	0.1357	0.1407	0.1374	0.1397	0.1422
		0.1676	0.1366	0.1336	0.1363	0.1364	0.136	0.1304	0.1346	0.1341	0.1289	0.1294	0.1325
		0.1335	0.133	0.1376	0.135	0.1302	0.1382	0.1337	0.138	0.1376	0.1373	0.1405	0.138
		0.131	0.1326	0.1348	0.137	0.1365	0.1334	0.1343	0.1343	0.1367	0.1345	0.137	0.1399
		0.1319	0.1326	0.1389	0.1374	0.1356	0.1359	0.1436	0.1359	0.1366	0.1351	0.1372	0.1321
		0.131	0.1331	0.1308	0.1382	0.1323	0.1375	0.1369	0.1368	0.1364	0.1339	0.1385	0.1364
8:00:00	37.00	0.1638	0.1433	0.1467	0.1425	0.1409	0.1394	0.1361	0.1372	0.1521	0.1603	0.158	0.1483
		0.1718	0.1415	0.1372	0.1405	0.1399	0.1361	0.1363	0.1354	0.139	0.1371	0.1388	0.1536
		0.198	0.1399	0.1349	0.1416	0.1392	0.1393	0.1357	0.1355	0.1406	0.1387	0.139	0.1424
		0.1708	0.136	0.1328	0.1362	0.1364	0.136	0.1305	0.1346	0.1341	0.1304	0.1282	0.1327
		0.1322	0.132	0.1373	0.1353	0.1303	0.1385	0.1339	0.1382	0.1376	0.1396	0.1401	0.1378
		0.1304	0.1325	0.1365	0.1376	0.1366	0.1334	0.1343	0.1342	0.1367	0.1358	0.1359	0.1399
		0.1298	0.1324	0.1374	0.1376	0.1353	0.1359	0.1435	0.1359	0.1368	0.1362	0.136	0.132
		0.131	0.1328	0.1309	0.1382	0.1324	0.1376	0.1371	0.1369	0.1365	0.1351	0.1372	0.1364
8:10:00	37.00	0.1634	0.142	0.1463	0.1425	0.1417	0.1392	0.1373	0.137	0.1505	0.1605	0.1543	0.1484
		0.1685	0.1409	0.1368	0.1405	0.1397	0.1364	0.1377	0.1355	0.1387	0.1364	0.1387	0.1532
		0.196	0.14	0.1351	0.1414	0.1396	0.1392	0.137	0.1354	0.1412	0.1385	0.1389	0.1422
		0.167	0.1356	0.1326	0.1357	0.1363	0.1361	0.1316	0.1345	0.1338	0.1307	0.1284	0.1326
		0.1315	0.132	0.1376	0.1354	0.1303	0.1384	0.1352	0.1385	0.1376	0.1396	0.1397	0.1378
		0.1304	0.1323	0.1344	0.1376	0.1366	0.1334	0.1356	0.1344	0.1365	0.1358	0.1358	0.1401
		0.1299	0.1323	0.1401	0.1379	0.1351	0.136	0.145	0.1361	0.1369	0.1363	0.1359	0.132
		0.1308	0.1329	0.1308	0.1381	0.1326	0.1376	0.1389	0.1372	0.1367	0.1351	0.1375	0.1366
8:20:00	37.00	0.1633	0.1427	0.1463	0.1423	0.1407	0.1393	0.1361	0.1372	0.1517	0.1622	0.1575	0.1474
		0.1668	0.1416	0.1369	0.141	0.1397	0.1363	0.1366	0.1355	0.1394	0.1366	0.1397	0.153
		0.1927	0.1394	0.1349	0.1414	0.1401	0.1394	0.1358	0.1356	0.1419	0.1383	0.1401	0.1421
		0.1687	0.1348	0.1324	0.136	0.1358	0.1362	0.1304	0.1345	0.1354	0.1309	0.1296	0.1323
		0.131	0.1319	0.137	0.1353	0.1304	0.1386	0.134	0.1389	0.1389	0.1408	0.1413	0.1379
		0.1301	0.1321	0.1356	0.1392	0.1369	0.1337	0.1345	0.1349	0.1379	0.1363	0.1371	0.1399
		0.13	0.1321	0.1362	0.1379	0.1353	0.136	0.1436	0.1362	0.1384	0.1366	0.1372	0.1321
		0.13	0.1326	0.1305	0.138	0.1331	0.1376	0.1382	0.1374	0.1377	0.1351	0.1387	0.1366
8:30:00	37.00	0.1644	0.141	0.1461	0.1426	0.1405	0.1392	0.1363	0.1372	0.1498	0.1585	0.1548	0.148
		0.1669	0.1401	0.1365	0.1409	0.14	0.1369	0.137	0.1355	0.1385	0.1353	0.1384	0.1537
		0.1923	0.1397	0.135	0.1412	0.1402	0.139	0.136	0.1355	0.1412	0.1369	0.1385	0.1432
		0.1628	0.1363	0.1323	0.1359	0.1361	0.1369	0.1306	0.1345	0.1343	0.1299	0.1287	0.1394
		0.1304	0.1316	0.1373	0.1357	0.1305	0.1387	0.1342	0.1392	0.138	0.1408	0.1406	0.1394
		0.1303	0.1319	0.1346	0.1391	0.1368	0.1337	0.1346	0.1352	0.1366	0.1352	0.1359	0.1413
		0.1293	0.1321	0.1382	0.1384	0.1351	0.1362	0.1438	0.1365	0.1378	0.1353	0.136	0.1334
		0.1303	0.1325	0.1305	0.1384	0.1329	0.1377	0.1392	0.1376	0.1368	0.1342	0.1377	0.1379
8:40:00	37.00	0.1625	0.1413	0.1461	0.1426	0.1407	0.1392	0.1365	0.1382	0.1503	0.1605	0.1542	0.147
		0.1644	0.1398	0.1364	0.1409	0.1397	0.1368	0.1373	0.1366	0.1394	0.1361	0.1392	0.153
		0.1891	0.1396	0.1348	0.1414	0.1409	0.1392	0.1363	0.1367	0.1429	0.1382	0.1396	0.1418
		0.1597	0.1352	0.132	0.136	0.1358	0.1366	0.1304	0.1357	0.1358	0.1314	0.1298	0.1331
		0.1307	0.1316	0.137	0.1361	0.1306	0.1388	0.1344	0.141	0.1393	0.1441	0.1426	0.1383
		0.1301	0.1322	0.1344	0.1405	0.1367	0.1337	0.1347	0.1372	0.138	0.1365	0.1372	0.1401
		0.1302	0.1323	0.1369	0.1386	0.1356	0.1364	0.1439	0.138	0.1394	0.1366	0.1373	0.1324
		0.1304	0.1326	0.1305	0.1385	0.1329	0.1377	0.14	0.1392	0.1381	0.1354	0.1388	0.137
8:50:00	37.00	0.1607	0.1413	0.1458	0.1428	0.1409	0.1394	0.1365	0.1372	0.1496	0.1594	0.1529	0.1465
		0.1635	0.1397	0.1361	0.1407	0.1393	0.1375	0.1379	0.1355	0.1389	0.1361	0.1382	0.1526
		0.1898	0.1391	0.1347	0.1415	0.1414	0.1393	0.1365	0.1356	0.1435	0.1381	0.1384	0.1422
		0.1592	0.1353	0.1323	0.1358	0.1367	0.1358	0.131	0.1345	0.1362	0.1321	0.1288	0.1331
		0.1309	0.1315	0.1371	0.136	0.131	0.139	0.1346	0.1406	0.1391	0.1455	0.142	0.1386
		0.1306	0.1316	0.1344	0.1415	0.1371	0.1339	0.135	0.1365	0.1379	0.1376	0.1359	0.1402
		0.1289	0.1318	0.1393	0.139	0.1354	0.1365	0.1441	0.1373	0.1403	0.1369	0.1359	0.1323
		0.1306	0.1322	0.1302	0.1387	0.1332	0.1378	0.1414	0.1382	0.1384	0.1357	0.1378	0.1371
9:00:00	37.00	0.161	0.1421	0.1461	0.1424	0.1409	0.1395	0.1369	0.1372	0.1486	0.1578	0.1529	0.1459
		0.1627	0.1403	0.136	0.1408	0.1393	0.1378	0.1384	0.1354	0.1375	0.1359	0.1389	0.1523
		0.1901	0.1385	0.1343	0.1413	0.1428	0.1398	0.1368	0.1355	0.1429	0.1378	0.1395	0.1423
		0.1634	0.1354	0.1321	0.136	0.1352	0.1364	0.1308	0.1344	0.1353	0.132	0.1303	0.1389
		0.1313	0.1314	0.1371	0.1365	0.1309	0.1393	0.135	0.1413	0.1381	0.1476	0.1443	0.1379
		0.1297	0.1318	0.1357	0.143	0.1374	0.1343	0.1351	0.1377	0.1368	0.1374	0.1373	0.1404
		0.1292	0.1316	0.1371	0.1398	0.1355	0.1368	0.1442	0.1379	0.14	0.1371	0.1374	0.1323
		0.1299	0.1324	0.1304	0.1387	0.1334	0.1378	0.1426	0.1388	0.1377	0.1361	0.1392	0.1373
9:10:00	37.00	0.1602	0.1421	0.146	0.1428	0.1407	0.1396	0.1371	0.1382	0.1479	0.1581	0.152	0.1467
		0.1611	0.1393	0.1361	0.141	0.1397	0.1387	0.139	0.1367	0.1389	0.1347	0.1388	0.1529
		0.1893	0.1378	0.1347	0.141	0.1435	0.1397	0.1375	0.1367	0.1438	0.1365	0.1396	0.1433
		0.1583	0.1347	0.132	0.1359	0.1356	0.1368	0.1308	0.1355	0.1354	0.1309	0.1306	0.135
		0.1303	0.1315	0.1371	0.1365	0.1313	0.1397	0.1354	0.1436	0.1382	0.149	0.146	0.1394
		0.1295	0.1319	0.1347	0.1446	0.1374	0.1345	0.1355	0.1399	0.1368	0.1369	0.1375	0.1417
		0.1287	0.1317	0.1382	0.1402	0.1355	0.1371	0.1445	0.14	0.1412	0.1361	0.1376	0.1336
		0.1298	0.1324	0.1304	0.1388	0.1338	0.138	0.144	0.1405	0.1381	0.135	0.1395	0.1386
9:20:00	37.00	0.1572	0.1412	0.1459	0.1428	0.1406	0.1397	0.1376	0.1386	0.147	0.1567	0.1513	0.1463
		0.1605	0.1396	0.136	0.141	0.1395	0.1393	0.1399	0.1367	0.1377	0.1355	0.1374	0.1534
		0.1911	0.1381	0.1345	0.141	0.1455	0.14	0.138	0.1368	0.1448	0.138	0.1389	0.1439
		0.1577	0.1344	0.1317	0.136	0.1361	0.1369	0.1311	0.1356	0.1361	0.1329	0.1298	0.1354
		0.1298	0.1314	0.137	0.1373	0.1314	0.1399	0.1356	0.1449	0.1384	0.1538	0.1456	0.1396
		0.1295	0.1318	0.1349	0.1471	0.138	0.135	0.1359	0.1416	0.1368	0.1386	0.1364	0.1424
		0.1291	0.1317	0.1389	0.1413	0.1358	0.1374	0.1448	0.141	0.1428	0.1376	0.1363	0.1338
		0.13	0.1321	0.1303	0.1394	0.1343	0.138	0.1463	0.1414	0.1385	0.1363	0.1385	0.1387
9:30:00	37.00	0.1582	0.1406	0.1459	0.1429	0.1412	0.1397	0.1381	0.1373	0.1472	0.158	0.1503	0.1457
		0.1624	0.1388	0.1358	0.1413	0.1396	0.14	0.1415	0.1357	0.1372	0.1344	0.1371	0.153
		0.1894	0.1371	0.1343	0.1411	0.1469	0.1403	0.1385	0.1355	0.1461	0.1368	0.1381	0.1439
		0.161	0.1362	0.1321	0.1357	0.1358	0.137	0.1316	0.1343	0.1365	0.1319	0.1297	0.1365
		0.1302	0.1314	0.1372	0.1379	0.1322	0.1405	0.1362	0.1454	0.1388	0.156	0.1487	0.1398
		0.1299	0.1317	0.1348	0.1495	0.1385	0.1355	0.1365	0.1421	0.137	0.1381	0.1366	0.1426
		0.1303	0.1316	0.1388	0.1421	0.1359	0.1379	0.1452	0.1412	0.1447	0.1368	0.137	0.1339
		0.1292	0.1321	0.1304	0.1394	0.1351	0.1381	0.1484	0.1408	0.1392	0.1357	0.139	0.1394
9:40:00	37.00	0.1532	0.1406	0.1459	0.1428	0.1414	0.1401	0.1385	0.1382	0.1479	0.1545	0.1506	0.1444
		0.1625	0.1389	0.1357	0.1416	0.1396	0.141	0.1431	0.1367	0.1384	0.1351	0.1375	0.152
		0.1886	0.1373	0.1338	0.1411	0.1495	0.1406	0.1395	0.1366	0.1491	0.1364	0.1381	0.1431
		0.1563	0.1344	0.1315	0.1357	0.1355	0.1382	0.1321	0.1356	0.1385	0.133	0.1301	0.1361
		0.1312	0.1314	0.1371	0.1389	0.1323	0.1412	0.137	0.1488	0.1403	0.1613	0.1504	0.1386
		0.1301	0.1316	0.1351	0.1525	0.1389	0.1362	0.1372	0.1452	0.1382	0.1391	0.1367	0.142
		0.1287	0.1315	0.1402	0.1433	0.1361	0.1385	0.1458	0.1439	0.1484	0.1372	0.137	0.1329
		0.1297	0.1324	0.1304	0.1395	0.1357	0.1384	0.1517	0.1435	0.1418	0.1363	0.1392	0.1393
9:50:00	37.00	0.153	0.1409	0.1455	0.1433	0.1418	0.1416	0.1405	0.1384	0.1463	0.1551	0.1498	0.1453
		0.1613	0.1384	0.1356	0.1418	0.1396	0.1436	0.1462	0.1367	0.1368	0.1354	0.137	0.1526
		0.1833	0.1375	0.1341	0.1411	0.1516	0.1426	0.1419	0.1367	0.1503	0.1375	0.1379	0.1454
		0.1567	0.134	0.1315	0.136	0.1364	0.1398	0.1342	0.1356	0.1384	0.1355	0.1354	0.138
		0.1302	0.131	0.137	0.1403	0.1332	0.143	0.139	0.1515	0.1395	0.1671	0.1536	0.1402
		0.1292	0.1312	0.1351	0.1559	0.1396	0.1384	0.1392	0.1472	0.1371	0.1413	0.1368	0.1438
		0.1288	0.1316	0.1407	0.1447	0.1365	0.1407	0.1476	0.1463	0.1502	0.1392	0.1374	0.1345
		0.1289	0.1317	0.1301	0.1399	0.1369	0.1398	0.1572	0.1448	0.1417	0.1377	0.1397	0.1409
10:00:00	37.00	0.153	0.1399	0.1453	0.1432	0.1441	0.1409	0.14	0.1382	0.147	0.1555	0.1498	0.1445
		0.1604	0.1395	0.1357	0.1422	0.1394	0.1435	0.1482	0.1367	0.1381	0.1352	0.1382	0.1531
		0.1836	0.1365	0.1342	0.1412	0.1559	0.142	0.142	0.1368	0.1534	0.1382	0.1399	0.1461
		0.158	0.134	0.1314	0.1359	0.135	0.1402	0.1337	0.1356	0.1408	0.1357	0.1329	0.1394
		0.1294	0.1311	0.1372	0.1412	0.1337	0.1426	0.1392	0.1547	0.1412	0.1727	0.1579	0.1403
		0.1289	0.1313	0.1366	0.1598	0.1406	0.1383	0.139	0.15	0.1386	0.1426	0.1385	0.1448
		0.1283	0.1314	0.1398	0.1466	0.1368	0.1403	0.1473	0.1489	0.1546	0.1397	0.1393	0.1347
		0.1291	0.1319	0.1302	0.1404	0.1382	0.1389	0.1587	0.1466	0.1444	0.1387	0.1415	0.1417
10:10:00	37.00	0.1522	0.1407	0.1449	0.1434	0.1425	0.1419	0.1412	0.1383	0.1455	0.1559	0.1491	0.1448
		0.1591	0.139	0.1352	0.1422	0.1396	0.1466	0.1513	0.1367	0.1368	0.1354	0.1378	0.1526
		0.184	0.1362	0.1341	0.1412	0.1578	0.144	0.1439	0.1367	0.1558	0.1373	0.1393	0.1471
		0.1512	0.1333	0.1315	0.1357	0.1365	0.1424	0.1347	0.1355	0.1413	0.1375	0.1338	0.1414
		0.1292	0.1309	0.1376	0.1433	0.135	0.1451	0.1403	0.1589	0.141	0.1796	0.1625	0.1406
		0.1289	0.131	0.136	0.1636	0.1417	0.1409	0.1404	0.1521	0.1378	0.1442	0.1392	0.1457
		0.1282	0.1316	0.1416	0.1482	0.1371	0.1429	0.1483	0.1525	0.158	0.1405	0.1401	0.1352
		0.1291	0.1326	0.1303	0.1407	0.1402	0.1404	0.1642	0.1488	0.1451	0.1399	0.1425	0.1424
10:20:00	37.00	0.1506	0.1394	0.1455	0.1438	0.1437	0.1425	0.1428	0.1384	0.1466	0.156	0.1485	0.1443
		0.1568	0.1381	0.1358	0.1434	0.1395	0.1485	0.156	0.1368	0.1384	0.1358	0.1381	0.1531
		0.1861	0.136	0.134	0.1416	0.1625	0.1454	0.1459	0.1368	0.1596	0.1375	0.1394	0.149
		0.1555	0.1335	0.1315	0.1362	0.1352	0.1457	0.1363	0.1355	0.1442	0.1395	0.1389	0.1436
		0.1299	0.131	0.1375	0.1447	0.1362	0.1467	0.1423	0.1637	0.1426	0.1883	0.1671	0.1406
		0.1287	0.1313	0.1376	0.1687	0.1432	0.143	0.1418	0.1553	0.1392	0.1465	0.1394	0.1472
		0.1282	0.1314	0.1409	0.1508	0.1378	0.1448	0.1497	0.1568	0.163	0.1417	0.141	0.1359
		0.1288	0.1321	0.1303	0.1412	0.1422	0.1408	0.167	0.1513	0.1487	0.1409	0.1433	0.1436
10:30:00	37.00	0.1488	0.1396	0.1449	0.1439	0.1438	0.1425	0.1443	0.1371	0.145	0.1524	0.1479	0.1431
		0.1568	0.1383	0.1348	0.1441	0.1394	0.151	0.1607	0.1356	0.1367	0.1349	0.1377	0.1513
		0.1797	0.1364	0.1338	0.1416	0.1653	0.1469	0.149	0.1355	0.163	0.1377	0.1392	0.1499
		0.1536	0.1332	0.1314	0.1363	0.1362	0.1495	0.1381	0.1343	0.1457	0.1409	0.137	0.144
		0.1293	0.1307	0.1374	0.1475	0.1381	0.1482	0.1446	0.1683	0.1421	0.1944	0.173	0.14
		0.1287	0.1309	0.1374	0.1729	0.1449	0.1455	0.1439	0.1562	0.1382	0.1491	0.1399	0.1478
		0.1281	0.1313	0.1442	0.153	0.1384	0.1468	0.1512	0.1603	0.1675	0.1431	0.1425	0.1356
		0.1284	0.1318	0.1303	0.1417	0.1451	0.1415	0.1737	0.1528	0.1504	0.1425	0.1443	0.1439
10:40:00	37.00	0.1503	0.1404	0.1449	0.1446	0.1449	0.1429	0.1476	0.1383	0.1448	0.1536	0.1474	0.1438
		0.1559	0.138	0.1351	0.1448	0.1397	0.1533	0.1682	0.1367	0.1369	0.135	0.1365	0.1522
		0.1843	0.1359	0.1341	0.142	0.1717	0.149	0.1536	0.1368	0.1665	0.1376	0.1393	0.1537
		0.1534	0.1329	0.1309	0.1363	0.1357	0.154	0.1418	0.1355	0.1478	0.1423	0.1416	0.1485
		0.1292	0.1311	0.1378	0.1502	0.1393	0.1504	0.1487	0.1758	0.1431	0.2036	0.1776	0.1417
		0.1287	0.1311	0.138	0.1789	0.1472	0.1481	0.1473	0.1605	0.1387	0.1519	0.1396	0.1512
		0.1277	0.1312	0.1446	0.1558	0.139	0.1498	0.1546	0.1671	0.1723	0.1449	0.1429	0.1376
		0.1286	0.1318	0.1303	0.1425	0.1487	0.1422	0.1777	0.158	0.1535	0.1444	0.1448	0.147
10:50:00	37.00	0.1484	0.1392	0.1453	0.1452	0.1458	0.1435	0.1502	0.1382	0.1443	0.1527	0.1461	0.1437
		0.1547	0.1375	0.1349	0.1455	0.14	0.1563	0.1759	0.1369	0.1365	0.135	0.1362	0.1518
		0.1793	0.1354	0.1336	0.1424	0.174	0.1511	0.1578	0.1367	0.1701	0.1377	0.1383	0.1556
		0.1516	0.133	0.1311	0.1367	0.136	0.1603	0.1451	0.1355	0.1502	0.1442	0.1408	0.1503
		0.1291	0.1309	0.1383	0.154	0.1416	0.1532	0.1527	0.1825	0.1444	0.2073	0.1862	0.1413
		0.1286	0.1309	0.1391	0.1823	0.1497	0.1521	0.1501	0.163	0.1396	0.1551	0.1408	0.1536
		0.1279	0.131	0.1468	0.1582	0.14	0.1531	0.1573	0.1745	0.1784	0.1469	0.1451	0.1391
		0.1288	0.132	0.1303	0.1435	0.1529	0.1431	0.1812	0.1609	0.1576	0.1468	0.1468	0.1489
11:00:00	37.00	0.1471	0.1388	0.1446	0.1478	0.1483	0.1441	0.1536	0.1382	0.1442	0.1571	0.1467	0.1431
		0.1556	0.138	0.135	0.1479	0.14	0.1593	0.1845	0.1367	0.1365	0.1349	0.1375	0.1529
		0.1802	0.1356	0.1339	0.1438	0.1805	0.1543	0.1631	0.1368	0.1762	0.1376	0.1395	0.1612
		0.1576	0.1327	0.1307	0.1385	0.1351	0.1682	0.1489	0.136	0.1548	0.1487	0.1524	0.1612
		0.1295	0.1308	0.1387	0.1593	0.1439	0.1566	0.1567	0.1912	0.1459	0.2193	0.1936	0.1425
		0.1292	0.1309	0.142	0.1905	0.1534	0.1562	0.1536	0.1664	0.1404	0.1596	0.1429	0.1573
		0.1281	0.131	0.1463	0.1629	0.1411	0.1577	0.1605	0.1828	0.1841	0.1496	0.1488	0.1407
		0.1285	0.1315	0.1318	0.1459	0.1573	0.1445	0.1873	0.1668	0.1624	0.1502	0.15	0.1519
11:10:00	37.00	0.1472	0.139	0.145	0.1488	0.15	0.1452	0.1575	0.1372	0.1447	0.1514	0.1468	0.1421
		0.1545	0.1375	0.135	0.1489	0.1417	0.1631	0.1951	0.1356	0.1377	0.1348	0.1374	0.1508
		0.1804	0.1354	0.1337	0.1439	0.1837	0.1581	0.1694	0.1356	0.1814	0.1379	0.1397	0.1635
		0.1488	0.1327	0.131	0.1388	0.1369	0.1808	0.1539	0.1351	0.1589	0.1509	0.1535	0.1591
		0.1284	0.1308	0.1394	0.1644	0.1483	0.1606	0.1619	0.1984	0.1492	0.2247	0.2032	0.1411
		0.1285	0.131	0.1416	0.1942	0.1579	0.1615	0.1579	0.168	0.1426	0.1637	0.1447	0.1599
		0.1276	0.1308	0.1481	0.1657	0.144	0.1628	0.1643	0.1916	0.191	0.1527	0.1522	0.1416
		0.1283	0.1317	0.1308	0.1466	0.1647	0.146	0.1911	0.1693	0.1699	0.1533	0.1527	0.1541
11:20:00	37.00	0.1473	0.1389	0.1448	0.1511	0.1509	0.1462	0.1622	0.1385	0.1435	0.1526	0.1462	0.1434
		0.1598	0.137	0.1342	0.1507	0.1405	0.1686	0.2063	0.1367	0.1364	0.1347	0.137	0.1519
		0.1791	0.135	0.1339	0.1449	0.1881	0.1631	0.1768	0.1366	0.1887	0.1382	0.1435	0.1724
		0.1486	0.1325	0.1308	0.1397	0.137	0.1974	0.1599	0.1388	0.1634	0.1575	0.1614	0.1633
		0.1285	0.1307	0.1402	0.1702	0.1496	0.1656	0.1684	0.21	0.1504	0.2388	0.2113	0.1436
		0.1284	0.1306	0.144	0.2004	0.1617	0.1675	0.163	0.174	0.1427	0.1695	0.1465	0.1661
		0.1277	0.1309	0.153	0.1709	0.1441	0.171	0.1692	0.2044	0.1959	0.1566	0.1556	0.1454
		0.1282	0.1317	0.1313	0.1486	0.1712	0.1478	0.1971	0.1782	0.1761	0.1577	0.1561	0.1592
11:30:00	37.00	0.1464	0.1386	0.1443	0.1532	0.1551	0.1481	0.1683	0.1383	0.1444	0.1511	0.146	0.1434
		0.1539	0.1374	0.1345	0.1521	0.1425	0.1717	0.218	0.1367	0.137	0.1351	0.1371	0.1519
		0.1764	0.1334	0.1342	0.1451	0.1903	0.17	0.1877	0.1369	0.1966	0.1392	0.1428	0.1809
		0.1502	0.132	0.1304	0.1405	0.1366	0.2215	0.1669	0.1422	0.1707	0.1663	0.1692	0.1723
		0.1285	0.1306	0.1415	0.1787	0.1555	0.1717	0.1761	0.2211	0.1548	0.2488	0.2205	0.1444
		0.1281	0.1306	0.1467	0.2046	0.1675	0.1751	0.1696	0.1777	0.1456	0.1762	0.1489	0.1717
		0.1274	0.1308	0.1567	0.1745	0.1477	0.1789	0.175	0.2161	0.2036	0.1607	0.1603	0.1482
		0.128	0.1318	0.1315	0.1507	0.1811	0.1501	0.205	0.1852	0.1854	0.163	0.1602	0.1647
11:40:00	37.00	0.1465	0.1382	0.1448	0.157	0.1583	0.1493	0.1752	0.1383	0.1445	0.154	0.1453	0.143
		0.1514	0.1371	0.1345	0.1545	0.1424	0.176	0.2311	0.1367	0.1372	0.1349	0.1373	0.1519
		0.18	0.1331	0.134	0.1457	0.1945	0.1778	0.1987	0.1368	0.2017	0.1394	0.1432	0.1882
		0.1471	0.132	0.1307	0.1416	0.1373	0.2533	0.1766	0.1474	0.1764	0.1745	0.189	0.1801
		0.1284	0.1308	0.1431	0.1852	0.1585	0.1786	0.1857	0.2321	0.1586	0.2591	0.2297	0.145
		0.1282	0.1305	0.1489	0.2096	0.1737	0.1838	0.1768	0.1837	0.1479	0.1829	0.1522	0.1779
		0.1273	0.1308	0.1575	0.1787	0.1499	0.1898	0.1818	0.2291	0.208	0.1661	0.1659	0.1523
		0.1279	0.1318	0.1323	0.1532	0.1914	0.1529	0.2078	0.1936	0.1962	0.1689	0.1653	0.171
11:50:00	37.00	0.1459	0.1385	0.1458	0.161	0.1627	0.1519	0.1826	0.1383	0.1435	0.1505	0.1438	0.1427
		0.1549	0.1372	0.1356	0.1563	0.1434	0.1814	0.2434	0.1367	0.1373	0.135	0.1356	0.1516
		0.1721	0.1332	0.1355	0.1468	0.1955	0.1881	0.2152	0.1367	0.2126	0.1397	0.14	0.2028
		0.1505	0.132	0.1319	0.1433	0.138	0.286	0.1876	0.1468	0.1843	0.1822	0.1969	0.1891
		0.1288	0.1307	0.1461	0.1961	0.1645	0.1879	0.1961	0.2436	0.163	0.2699	0.2398	0.146
		0.1279	0.1302	0.1543	0.2136	0.18	0.1938	0.1861	0.1895	0.1508	0.1914	0.1551	0.1851
		0.1271	0.1306	0.1637	0.1835	0.1534	0.2018	0.1905	0.2419	0.2148	0.1712	0.1712	0.1566
		0.128	0.1317	0.1345	0.1566	0.2031	0.1563	0.2165	0.2018	0.208	0.1767	0.1715	0.1786
12:00:00	37.00	0.1454	0.1378	0.1447	0.1664	0.1667	0.1549	0.1928	0.1382	0.1437	0.151	0.1451	0.1441
		0.153	0.1364	0.134	0.158	0.1442	0.1863	0.2539	0.1366	0.1369	0.1344	0.1368	0.1513
		0.1729	0.1327	0.1344	0.1463	0.1985	0.2025	0.2332	0.1367	0.219	0.1412	0.1463	0.215
		0.148	0.1319	0.1306	0.1439	0.1387	0.3176	0.2015	0.1445	0.1906	0.1894	0.2096	0.2144
		0.1284	0.1305	0.1475	0.2049	0.1689	0.1978	0.2081	0.2558	0.1694	0.2795	0.2499	0.1474
		0.1278	0.1306	0.1565	0.216	0.1889	0.2057	0.1967	0.1984	0.1536	0.2002	0.161	0.1935
		0.1272	0.1306	0.1675	0.1875	0.1567	0.2152	0.2006	0.2559	0.2201	0.178	0.18	0.1623
		0.1276	0.1315	0.1348	0.1594	0.2155	0.1601	0.2204	0.212	0.2228	0.1855	0.1837	0.1881
12:10:00	37.00	0.1441	0.1381	0.1454	0.1727	0.1723	0.1587	0.2038	0.1384	0.1433	0.151	0.1445	0.1426
		0.1528	0.1362	0.1355	0.1615	0.1449	0.192	0.2652	0.1367	0.1371	0.1348	0.1364	0.1517
		0.1746	0.1332	0.1356	0.1483	0.1993	0.2189	0.2557	0.1366	0.2311	0.1416	0.1432	0.2314
		0.1499	0.1316	0.132	0.1476	0.1378	0.3436	0.2162	0.1427	0.2001	0.2033	0.2428	0.2119
		0.1281	0.1305	0.152	0.2209	0.1755	0.2102	0.2209	0.268	0.1768	0.2895	0.2611	0.1484
		0.1277	0.1304	0.1646	0.2197	0.1982	0.2181	0.2098	0.2073	0.158	0.2108	0.1671	0.2025
		0.127	0.1309	0.1709	0.1946	0.1613	0.2288	0.2128	0.2682	0.2274	0.1858	0.1895	0.1689
		0.1277	0.1317	0.138	0.1662	0.2296	0.1649	0.2297	0.2216	0.2369	0.1959	0.2023	0.1997
12:20:00	37.00	0.145	0.1381	0.1445	0.1814	0.1787	0.1631	0.2159	0.1382	0.1433	0.1508	0.1447	0.1465
		0.1509	0.1363	0.1342	0.165	0.1463	0.1976	0.2746	0.1367	0.1369	0.1344	0.1366	0.1522
		0.1727	0.1328	0.1344	0.1493	0.2021	0.2393	0.2789	0.1367	0.239	0.143	0.1469	0.2475
		0.1478	0.1315	0.1305	0.1504	0.139	0.3649	0.232	0.1423	0.2071	0.21	0.2461	0.2262
		0.1285	0.1306	0.1552	0.2364	0.1812	0.2237	0.2346	0.2809	0.1863	0.299	0.271	0.1498
		0.1277	0.1304	0.1658	0.2227	0.2107	0.2307	0.2247	0.22	0.163	0.2215	0.1737	0.2127
		0.1268	0.1308	0.1786	0.2015	0.1662	0.2442	0.2285	0.2826	0.2351	0.1946	0.1997	0.1771
		0.1276	0.1321	0.1387	0.1719	0.2434	0.1707	0.2349	0.2347	0.2539	0.2074	0.2295	0.2118
12:30:00	37.00	0.1445	0.138	0.1444	0.1912	0.1858	0.1686	0.2298	0.1382	0.143	0.1502	0.1441	0.1429
		0.1512	0.1365	0.1338	0.1682	0.1486	0.2042	0.2855	0.1368	0.1372	0.1344	0.1363	0.1514
		0.1748	0.1327	0.1349	0.1512	0.2031	0.2612	0.3029	0.1368	0.2538	0.1446	0.1449	0.2706
		0.1485	0.1315	0.1304	0.1537	0.1394	0.3814	0.2486	0.1421	0.2196	0.2295	0.2653	0.2473
		0.1287	0.1309	0.1593	0.2562	0.1895	0.2376	0.2487	0.2935	0.1973	0.3104	0.2827	0.1516
		0.1278	0.1302	0.1726	0.2248	0.2235	0.2434	0.2426	0.2329	0.1699	0.2339	0.1814	0.2238
		0.1277	0.1305	0.1829	0.209	0.1727	0.258	0.2454	0.2954	0.245	0.2038	0.2112	0.1869
		0.1278	0.132	0.1414	0.1809	0.2564	0.1772	0.2465	0.2462	0.2713	0.2204	0.2647	0.2258
12:40:00	37.00	0.1446	0.1378	0.1444	0.2041	0.1944	0.1745	0.2446	0.1383	0.1429	0.1495	0.1441	0.1429
		0.1539	0.1361	0.1339	0.1722	0.1502	0.2102	0.296	0.1367	0.1369	0.1342	0.1364	0.1514
		0.1722	0.1333	0.1347	0.1523	0.2062	0.2844	0.3246	0.1367	0.2632	0.1469	0.1464	0.2901
		0.1479	0.1316	0.1306	0.1576	0.141	0.394	0.2637	0.1401	0.2287	0.2419	0.2898	0.2672
		0.1276	0.131	0.1649	0.2763	0.1972	0.2531	0.2626	0.3086	0.2124	0.3159	0.2944	0.1533
		0.1275	0.1303	0.1774	0.2265	0.2389	0.2579	0.2625	0.2488	0.1804	0.2466	0.1907	0.2378
		0.127	0.1307	0.1905	0.2173	0.1796	0.2711	0.2688	0.3094	0.2542	0.2139	0.2233	0.1983
		0.1275	0.1325	0.1451	0.1887	0.2688	0.185	0.2541	0.2609	0.2937	0.2348	0.3041	0.2398
12:50:00	37.00	0.1439	0.1376	0.1446	0.2175	0.2035	0.1829	0.2597	0.1372	0.1425	0.1542	0.1439	0.1414
		0.1495	0.1358	0.1345	0.1763	0.1529	0.2179	0.3084	0.1356	0.1367	0.1351	0.1365	0.1503
		0.1739	0.1334	0.1349	0.1548	0.2086	0.3084	0.3466	0.1355	0.2798	0.149	0.148	0.3176
		0.147	0.1312	0.1305	0.1627	0.1411	0.4039	0.2788	0.1374	0.2431	0.2678	0.3213	0.2993
		0.1279	0.1313	0.1713	0.2964	0.2079	0.2689	0.2766	0.3222	0.229	0.3264	0.3083	0.155
		0.1282	0.1303	0.1853	0.2295	0.2539	0.2736	0.2851	0.2628	0.1947	0.2604	0.2006	0.255
		0.127	0.1306	0.1968	0.2267	0.1888	0.2838	0.2891	0.3207	0.2655	0.225	0.2373	0.2096
		0.1273	0.1324	0.1488	0.1989	0.2844	0.1934	0.2686	0.2736	0.3155	0.2495	0.3427	0.253
13:00:00	37.00	0.1436	0.1372	0.1445	0.2346	0.2139	0.1915	0.2759	0.1381	0.1426	0.1496	0.1434	0.1417
		0.1512	0.1376	0.1339	0.1812	0.1558	0.2269	0.3202	0.1367	0.1371	0.1346	0.1363	0.1518
		0.1699	0.1323	0.135	0.1562	0.2144	0.3307	0.3652	0.1366	0.2907	0.1534	0.1512	0.3393
		0.1449	0.131	0.1304	0.1678	0.1423	0.4148	0.2925	0.1398	0.2545	0.2867	0.3419	0.317
		0.1278	0.1317	0.1799	0.3134	0.2179	0.2876	0.291	0.3393	0.2489	0.3345	0.3205	0.1588
		0.1276	0.1302	0.19	0.2319	0.2708	0.2898	0.3087	0.2797	0.2168	0.2751	0.2118	0.2782
		0.1274	0.1306	0.2061	0.2375	0.1977	0.2968	0.3173	0.336	0.275	0.2371	0.2506	0.2248
		0.1273	0.1327	0.1541	0.2077	0.2984	0.2027	0.279	0.2908	0.3424	0.2648	0.3738	0.2685
13:10:00	37.00	0.1427	0.1383	0.1445	0.249	0.2251	0.2015	0.2921	0.1385	0.1424	0.1493	0.1433	0.1418
		0.1539	0.1373	0.1339	0.1851	0.1598	0.2333	0.3375	0.1367	0.1369	0.1345	0.1364	0.152
		0.1707	0.1322	0.1355	0.159	0.2197	0.3532	0.3821	0.1367	0.3076	0.1592	0.1559	0.3704
		0.1448	0.1308	0.1304	0.1755	0.1431	0.417	0.3068	0.1407	0.2723	0.3185	0.3794	0.3549
		0.1279	0.1322	0.1892	0.329	0.2302	0.3057	0.3068	0.3577	0.2689	0.3478	0.3387	0.1633
		0.1273	0.1304	0.1987	0.2341	0.2865	0.3099	0.336	0.2953	0.2456	0.2902	0.2246	0.3055
		0.1269	0.1306	0.2165	0.2489	0.209	0.309	0.339	0.3495	0.287	0.2486	0.2665	0.2394
		0.1272	0.1331	0.1601	0.2213	0.3145	0.2131	0.2992	0.306	0.3694	0.2826	0.3988	0.2839
13:20:00	37.00	0.1431	0.137	0.1446	0.2687	0.2361	0.2177	0.3095	0.1383	0.1417	0.1482	0.1431	0.1415
		0.15	0.1358	0.1337	0.192	0.1647	0.2424	0.3565	0.1367	0.137	0.1347	0.1377	0.1515
		0.1685	0.1324	0.1355	0.1608	0.2274	0.3753	0.3988	0.1368	0.3211	0.165	0.157	0.4029
		0.1479	0.1308	0.1308	0.1822	0.1446	0.4222	0.3196	0.1452	0.2861	0.3345	0.4199	0.3769
		0.1275	0.1323	0.1998	0.341	0.2418	0.3252	0.3213	0.3764	0.2871	0.3557	0.3552	0.1671
		0.1273	0.1305	0.206	0.2375	0.3047	0.332	0.3622	0.3128	0.2807	0.3072	0.2372	0.3344
		0.1267	0.1307	0.2234	0.2639	0.2209	0.3216	0.3661	0.3655	0.2991	0.2616	0.2818	0.2539
		0.1271	0.1339	0.1672	0.2335	0.3305	0.2239	0.315	0.3233	0.3991	0.3014	0.4199	0.3007
13:30:00	37.00	0.1423	0.137	0.1461	0.2813	0.247	0.2252	0.3282	0.1383	0.1421	0.151	0.1431	0.1418
		0.15	0.1356	0.135	0.1969	0.1693	0.252	0.3798	0.1368	0.1382	0.1376	0.1366	0.1613
		0.1664	0.1321	0.1367	0.1636	0.2346	0.3967	0.4138	0.1367	0.3312	0.1714	0.1689	0.4208
		0.1444	0.1307	0.1317	0.1914	0.1452	0.4259	0.3315	0.1474	0.3034	0.3593	0.4413	0.4159
		0.1275	0.1327	0.2129	0.3534	0.2539	0.3447	0.3358	0.3926	0.3015	0.3579	0.3761	0.1711
		0.1271	0.1309	0.2205	0.2387	0.3199	0.3576	0.3875	0.3289	0.3161	0.3219	0.2502	0.3619
		0.1267	0.1307	0.2304	0.2797	0.2326	0.334	0.3923	0.38	0.3135	0.2731	0.2989	0.2688
		0.1271	0.1344	0.1767	0.2455	0.3463	0.2357	0.3361	0.3372	0.4275	0.3221	0.4361	0.319
13:40:00	37.00	0.1424	0.137	0.1459	0.296	0.2591	0.2393	0.3484	0.1382	0.1416	0.1522	0.1429	0.1419
		0.1475	0.1355	0.1352	0.2054	0.1768	0.2628	0.4051	0.1367	0.1397	0.1342	0.1364	0.1516
		0.1703	0.1327	0.1373	0.167	0.2477	0.4183	0.4281	0.1367	0.3599	0.1901	0.1665	0.4715
		0.1437	0.1312	0.1319	0.2016	0.1489	0.4281	0.348	0.1471	0.3274	0.3993	0.5058	0.4513
		0.1283	0.1331	0.2248	0.3664	0.269	0.3645	0.3515	0.4155	0.3171	0.3801	0.3975	0.1785
		0.1271	0.1308	0.2237	0.2447	0.3379	0.3807	0.4156	0.3475	0.352	0.341	0.2635	0.3855
		0.1266	0.1307	0.2412	0.2986	0.2486	0.3475	0.413	0.3985	0.3281	0.2871	0.3158	0.2824
		0.127	0.1349	0.1871	0.2612	0.3631	0.2494	0.3628	0.3575	0.4559	0.3432	0.4485	0.338
13:50:00	37.00	0.1421	0.137	0.1453	0.3076	0.272	0.253	0.3682	0.1382	0.1416	0.1495	0.1428	0.1418
		0.1482	0.1354	0.1338	0.2127	0.1846	0.2734	0.434	0.1368	0.1371	0.136	0.1363	0.1512
		0.1678	0.1322	0.1364	0.1705	0.2604	0.4367	0.4454	0.1366	0.3783	0.1957	0.1734	0.4918
		0.1457	0.1308	0.1304	0.2131	0.1529	0.4334	0.3631	0.1457	0.3464	0.4177	0.5345	0.4776
		0.1273	0.1338	0.2367	0.3772	0.2853	0.3861	0.3673	0.4346	0.3274	0.3904	0.4192	0.1838
		0.1267	0.131	0.2324	0.2491	0.3531	0.4071	0.4416	0.3653	0.3853	0.358	0.2784	0.4059
		0.1264	0.1307	0.2495	0.3175	0.2629	0.3621	0.4367	0.4165	0.3455	0.3008	0.3354	0.2972
		0.1268	0.1355	0.1971	0.2771	0.3826	0.2639	0.3876	0.373	0.4857	0.3651	0.4627	0.3583
14:00:00	37.00	0.1419	0.1368	0.1456	0.3199	0.2851	0.2685	0.3877	0.1383	0.1411	0.149	0.1419	0.1416
		0.1475	0.1354	0.1344	0.2228	0.1939	0.286	0.463	0.1367	0.1383	0.1372	0.1382	0.1574
		0.1703	0.1316	0.137	0.1743	0.2743	0.4553	0.4606	0.1367	0.4008	0.2155	0.189	0.5283
		0.1455	0.1306	0.1307	0.225	0.1567	0.4371	0.3805	0.1439	0.3737	0.4502	0.5685	0.5361
		0.1281	0.1344	0.2487	0.3904	0.303	0.4066	0.3863	0.4569	0.3384	0.4069	0.4471	0.1934
		0.1271	0.131	0.2462	0.2568	0.3727	0.4307	0.4686	0.3857	0.4164	0.377	0.2929	0.4261
		0.1263	0.131	0.2584	0.3382	0.2783	0.3778	0.459	0.4349	0.363	0.3162	0.3555	0.3108
		0.1269	0.1362	0.2096	0.2934	0.4012	0.2805	0.4167	0.3952	0.5068	0.3871	0.4747	0.3795
14:10:00	37.00	0.1419	0.1367	0.1469	0.3285	0.2994	0.2864	0.4067	0.1382	0.1413	0.1491	0.1428	0.1415
		0.1471	0.1352	0.1356	0.232	0.2037	0.2996	0.4914	0.1366	0.1379	0.1356	0.1367	0.1521
		0.1683	0.1318	0.1389	0.1795	0.2893	0.4751	0.4763	0.1366	0.4261	0.2298	0.1906	0.5388
		0.1416	0.1306	0.132	0.2387	0.1604	0.44	0.3974	0.1434	0.3962	0.485	0.6194	0.5582
		0.1271	0.1351	0.2616	0.4031	0.3218	0.4264	0.4145	0.4783	0.3461	0.4222	0.4714	0.2007
		0.1268	0.1313	0.254	0.2654	0.387	0.4517	0.4925	0.4044	0.4427	0.3952	0.3082	0.4408
		0.1265	0.1312	0.2704	0.3571	0.2948	0.3964	0.4815	0.4523	0.3847	0.3316	0.3759	0.3254
		0.1269	0.137	0.2209	0.3083	0.4217	0.2967	0.4407	0.4108	0.5288	0.4075	0.4893	0.4017
14:20:00	37.00	0.1416	0.1365	0.1474	0.3388	0.3157	0.305	0.4262	0.1385	0.141	0.1481	0.1419	0.1418
		0.1457	0.1348	0.1358	0.2446	0.2138	0.3164	0.5181	0.1367	0.1381	0.137	0.1368	0.1526
		0.1683	0.1319	0.1403	0.184	0.3048	0.4944	0.4921	0.1366	0.451	0.2484	0.2001	0.5752
		0.1411	0.1304	0.1322	0.2521	0.1647	0.4469	0.4181	0.1437	0.4255	0.5253	0.6713	0.6085
		0.1278	0.1364	0.2732	0.4173	0.3435	0.4498	0.4488	0.5027	0.3566	0.448	0.501	0.2131
		0.1271	0.1317	0.2669	0.2766	0.4057	0.474	0.5167	0.4273	0.4689	0.4168	0.3244	0.4592
		0.1263	0.1314	0.2798	0.3783	0.3111	0.4139	0.4992	0.4751	0.406	0.3502	0.3971	0.3391
		0.1267	0.1384	0.233	0.3224	0.4434	0.3148	0.4684	0.4352	0.5421	0.4292	0.5015	0.4256
14:30:00	37.00	0.142	0.1366	0.1469	0.3445	0.3332	0.323	0.446	0.1371	0.141	0.1489	0.1424	0.1435
		0.145	0.1351	0.1351	0.2558	0.2265	0.3314	0.5431	0.1356	0.1382	0.1361	0.1364	0.1534
		0.1677	0.1315	0.1396	0.1907	0.3201	0.5121	0.5067	0.1354	0.4823	0.2665	0.2105	0.5899
		0.1419	0.1303	0.1313	0.2664	0.1719	0.4548	0.4407	0.1394	0.4494	0.5559	0.7186	0.6593
		0.1272	0.1376	0.2821	0.4309	0.368	0.4748	0.481	0.5246	0.366	0.4675	0.5263	0.2221
		0.1269	0.132	0.2758	0.2884	0.4238	0.4972	0.5379	0.4437	0.4893	0.4384	0.3406	0.4722
		0.126	0.1317	0.289	0.3948	0.3278	0.4268	0.5202	0.4915	0.4262	0.3678	0.4188	0.3543
		0.1265	0.1394	0.244	0.3403	0.4706	0.3325	0.4912	0.4525	0.56	0.4504	0.5158	0.4488
14:40:00	37.00	0.1413	0.1364	0.1493	0.3524	0.3518	0.3427	0.4679	0.1382	0.1411	0.1486	0.1415	0.1413
		0.1451	0.1354	0.1371	0.2701	0.2394	0.3485	0.5682	0.1367	0.139	0.1421	0.1366	0.1595
		0.1705	0.131	0.1423	0.1975	0.3369	0.5306	0.5241	0.1366	0.5052	0.2881	0.229	0.6251
		0.1415	0.1303	0.1328	0.2809	0.1785	0.4661	0.4665	0.1407	0.4829	0.5878	0.7573	0.716
		0.127	0.139	0.2951	0.4465	0.3944	0.4999	0.5132	0.5494	0.377	0.4912	0.5563	0.2371
		0.1268	0.1325	0.2921	0.3026	0.4456	0.52	0.5604	0.4671	0.5084	0.4609	0.357	0.4896
		0.1263	0.132	0.3044	0.4141	0.3457	0.4399	0.5392	0.5145	0.4506	0.3866	0.4397	0.3716
		0.1266	0.1412	0.2643	0.3565	0.4929	0.3523	0.5154	0.4793	0.5773	0.473	0.5255	0.4725
14:50:00	37.00	0.141	0.1361	0.1497	0.3565	0.3703	0.3646	0.4872	0.1382	0.1404	0.1487	0.1418	0.1412
		0.1452	0.135	0.1361	0.2825	0.2538	0.3644	0.5912	0.1368	0.1398	0.1376	0.1366	0.1547
		0.1657	0.1312	0.1428	0.2059	0.3531	0.5469	0.5393	0.1366	0.5383	0.3132	0.2383	0.6545
		0.1414	0.1301	0.132	0.2942	0.1873	0.4726	0.4914	0.1402	0.507	0.6251	0.803	0.7665
		0.1282	0.1409	0.304	0.4614	0.4229	0.527	0.5418	0.5728	0.3876	0.5141	0.5823	0.2479
		0.1267	0.1336	0.3036	0.3181	0.4673	0.545	0.5836	0.4868	0.5223	0.4826	0.3734	0.4998
		0.1261	0.1325	0.3162	0.4324	0.3624	0.4553	0.5576	0.5353	0.4744	0.4051	0.4627	0.388
		0.1265	0.1424	0.2803	0.3741	0.5141	0.3726	0.5389	0.4971	0.598	0.4971	0.5391	0.4968
15:00:00	37.00	0.1409	0.1365	0.1523	0.3617	0.3887	0.3843	0.5101	0.138	0.1405	0.1476	0.1419	0.1417
		0.1443	0.1345	0.1379	0.2953	0.2683	0.3842	0.6157	0.1367	0.1417	0.1628	0.1385	0.1743
		0.1675	0.1323	0.1455	0.2124	0.3685	0.5663	0.5585	0.1365	0.55	0.5478	0.6736	0.6862
		0.1408	0.1299	0.1335	0.3076	0.1959	0.4841	0.5169	0.1406	0.5333	0.6422	0.8353	0.7888
		0.1268	0.1431	0.3153	0.4771	0.4484	0.5527	0.5707	0.5944	0.53	0.53	0.609	0.609
		0.1269	0.1344	0.32	0.3333	0.4894	0.5677	0.6059	0.5093	0.5381	0.5028	0.3895	0.5133
		0.1261	0.1332	0.3307	0.4508	0.3812	0.4727	0.575	0.5595	0.4995	0.4248	0.4822	0.4082
		0.1263	0.146	0.3003	0.3913	0.5344	0.3934	0.5601	0.5219	0.6166	0.519	0.5533	0.5198
15:10:00	37.00	0.1407	0.136	0.153	0.3681	0.4096	0.4045	0.5297	0.1386	0.1403	0.1497	0.1415	0.1416
		0.1441	0.1344	0.1378	0.3107	0.2836	0.4064	0.6382	0.1368	0.1417	0.1403	0.1371	0.1576
		0.1654	0.1311	0.1477	0.2226	0.386	0.5854	0.5777	0.1366	0.5888	0.4939	0.6701	0.6987
		0.1404	0.13	0.1331	0.322	0.2082	0.4992	0.5417	0.1402	0.5664	0.6887	0.8931	0.8522
		0.127	0.146	0.3257	0.4956	0.4774	0.5791	0.5957	0.6204	0.5124	0.5634	0.6383	0.6383
		0.1266	0.1356	0.3342	0.3521	0.5117	0.5935	0.6248	0.5288	0.5544	0.5312	0.4078	0.529
		0.1259	0.1337	0.3474	0.4714	0.4015	0.4909	0.5951	0.5841	0.5265	0.446	0.5022	0.424
		0.1263	0.1475	0.3203	0.4119	0.5547	0.415	0.5835	0.5471	0.6337	0.5432	0.5669	0.5439
15:20:00	37.00	0.1406	0.1361	0.1561	0.3731	0.4287	0.4279	0.5509	0.1381	0.1402	0.1478	0.1411	0.1417
		0.1452	0.1349	0.1405	0.3269	0.301	0.4293	0.6603	0.1368	0.1436	0.1442	0.1377	0.1599
		0.1624	0.131	0.1525	0.2326	0.4035	0.6087	0.5958	0.1366	0.6174	0.5513	0.6861	0.7311
		0.1406	0.1298	0.1349	0.3352	0.2189	0.5177	0.567	0.1404	0.6077	0.7326	0.9468	0.9076
		0.1269	0.1501	0.338	0.5164	0.5048	0.6078	0.6183	0.6432	0.4278	0.596	0.6622	0.3032
		0.1265	0.1369	0.3478	0.3705	0.5364	0.6167	0.6475	0.5507	0.57	0.5611	0.4264	0.5481
		0.126	0.1347	0.365	0.4937	0.4223	0.5282	0.6137	0.6088	0.5525	0.4692	0.5222	0.4435
		0.1263	0.15	0.3412	0.434	0.5728	0.4371	0.6052	0.5766	0.6554	0.5646	0.5803	0.5686
15:30:00	37.00	0.1407	0.1357	0.1573	0.3783	0.4476	0.4515	0.571	0.1382	0.1399	0.1473	0.1413	0.1417
		0.144	0.135	0.1412	0.3412	0.3183	0.4517	0.6803	0.1368	0.1452	0.1465	0.1382	0.1619
		0.1662	0.131	0.1562	0.2438	0.422	0.6304	0.6195	0.1366	0.6421	0.598	0.6043	0.7474
		0.1398	0.1299	0.1345	0.3482	0.2341	0.5388	0.5931	0.1404	0.6498	0.7695	0.986	0.9428
		0.1267	0.1542	0.3466	0.5367	0.5326	0.6342	0.6402	0.6659	0.4414	0.6249	0.688	0.3263
		0.1264	0.1384	0.3627	0.3912	0.5571	0.6382	0.6654	0.5732	0.5886	0.5893	0.4441	0.5645
		0.126	0.136	0.3831	0.5141	0.4452	0.5453	0.6328	0.6324	0.5794	0.4905	0.5426	0.4654
		0.1262	0.154	0.36	0.4562	0.5939	0.4593	0.6303	0.6036	0.6759	0.5854	0.5958	0.5914
15:40:00	37.00	0.1405	0.1359	0.1598	0.3833	0.468	0.477	0.5897	0.1382	0.1404	0.1479	0.1409	0.1421
		0.1435	0.1346	0.1435	0.3579	0.3358	0.4701	0.6978	0.1367	0.1481	0.1493	0.1394	0.1644
		0.1629	0.1307	0.1601	0.2533	0.4427	0.6546	0.638	0.1365	0.659	0.5451	0.5451	0.7538
		0.1396	0.13	0.1354	0.3628	0.2483	0.5639	0.6116	0.1404	0.6723	0.7961	0.7961	0.9732
		0.1268	0.1592	0.3579	0.5559	0.5594	0.6588	0.6571	0.6893	0.4559	0.6456	0.7069	0.3505
		0.1263	0.1406	0.3796	0.4111	0.5802	0.6586	0.6824	0.5951	0.6043	0.6184	0.4631	0.5824
		0.1258	0.1373	0.4007	0.5369	0.4723	0.5684	0.6538	0.6563	0.6073	0.5121	0.5623	0.4851
		0.126	0.1579	0.3717	0.4728	0.6148	0.483	0.6523	0.6305	0.6948	0.6074	0.6151	0.6125
15:50:00	37.00	0.1403	0.1356	0.1635	0.3896	0.4858	0.503	0.6068	0.1382	0.1399	0.1464	0.1409	0.1416
		0.1432	0.1346	0.1475	0.3744	0.3563	0.4922	0.7185	0.1369	0.1542	0.1615	0.1399	0.1668
		0.162	0.1311	0.1672	0.2665	0.4642	0.6791	0.661	0.1367	0.684	0.6145	0.6145	0.7692
		0.1393	0.13	0.138	0.3769	0.2661	0.5916	0.6383	0.1404	0.7166	0.8342	0.8342	0.8342
		0.1267	0.166	0.3707	0.5763	0.5867	0.6834	0.6741	0.7136	0.4732	0.6703	0.7266	0.3755
		0.1264	0.1431	0.3946	0.4304	0.5976	0.6751	0.6997	0.6169	0.6244	0.6536	0.4834	0.6015
		0.126	0.1391	0.4226	0.5594	0.5054	0.6027	0.6693	0.6796	0.6334	0.5327	0.5828	0.5074
		0.1263	0.1628	0.3885	0.4942	0.6405	0.5064	0.6776	0.6563	0.7081	0.6295	0.6332	0.6321
16:00:00	37.00	0.1398	0.1368	0.1671	0.3958	0.5065	0.5239	0.6212	0.1383	0.1399	0.1475	0.1413	0.1415
		0.1433	0.1357	0.1506	0.3932	0.3756	0.513	0.7319	0.1368	0.1585	0.1835	0.1424	0.1819
		0.1647	0.132	0.173	0.2774	0.4909	0.7039	0.6787	0.1366	0.7029	0.6452	0.6452	0.7904
		0.1395	0.131	0.1393	0.3936	0.2831	0.6241	0.6593	0.1404	0.762	0.8698	0.8698	0.8698
		0.1266	0.1751	0.3836	0.6008	0.6131	0.7044	0.6882	0.7273	0.4897	0.6882	0.7429	0.4002
		0.1264	0.1474	0.4106	0.452	0.6216	0.6929	0.7132	0.6413	0.6419	0.6855	0.5029	0.62
		0.126	0.1422	0.4414	0.5824	0.5346	0.631	0.6877	0.7012	0.6582	0.5537	0.6046	0.5307
		0.1261	0.1693	0.4014	0.5177	0.6675	0.5288	0.6988	0.6821	0.7232	0.6506	0.6549	0.6505
16:10:00	37.00	0.1399	0.1355	0.1705	0.4033	0.5201	0.5511	0.6371	0.1381	0.1396	0.1471	0.1412	0.1413
		0.1434	0.1345	0.1546	0.4111	0.396	0.534	0.7476	0.1368	0.1612	0.1669	0.1429	0.1791
		0.1621	0.1309	0.1799	0.2926	0.5244	0.7265	0.7036	0.1366	0.7307	0.7129	0.7129	0.8069
		0.1392	0.1294	0.1401	0.4116	0.3029	0.6594	0.6848	0.1402	0.7876	0.9011	0.9011	0.9011
		0.1265	0.1827	0.3972	0.6256	0.6371	0.7251	0.7043	0.7423	0.5132	0.7049	0.7595	0.4222
		0.1279	0.15	0.422	0.4741	0.6406	0.7092	0.7278	0.6629	0.6602	0.7229	0.5234	0.6442
		0.1259	0.144	0.461	0.6086	0.5586	0.651	0.7033	0.7226	0.6858	0.5758	0.6248	0.5549
		0.126	0.174	0.4152	0.5452	0.7016	0.5529	0.7204	0.7074	0.7345	0.6681	0.679	0.6697
16:20:00	37.00	0.1398	0.1358	0.1758	0.4114	0.5417	0.5705	0.645	0.1383	0.1394	0.1464	0.1405	0.141
		0.1428	0.1345	0.1606	0.4305	0.4152	0.5632	0.7599	0.1369	0.1679	0.1748	0.1446	0.1838
		0.1636	0.1304	0.1888	0.3035	0.5577	0.7523	0.7213	0.1367	0.7459	0.752	0.752	0.8245
		0.1389	0.1295	0.1435	0.4307	0.3227	0.6991	0.704	0.1405	0.8255	0.9388	0.9388	0.9388
		0.1266	0.1916	0.413	0.6478	0.661	0.7423	0.717	0.7549	0.5337	0.7147	0.7784	0.4402
		0.1263	0.1541	0.444	0.4946	0.6586	0.7199	0.7388	0.6849	0.6807	0.7576	0.5412	0.6643
		0.1259	0.1476	0.4817	0.6335	0.5804	0.667	0.7188	0.7407	0.7138	0.5956	0.6441	0.5814
		0.126	0.1819	0.4332	0.5666	0.7289	0.5722	0.7412	0.7312	0.7463	0.6852	0.7017	0.6876
16:30:00	37.00	0.1397	0.1354	0.1808	0.4214	0.5601	0.5935	0.6534	0.1383	0.1395	0.1469	0.1403	0.1417
		0.1426	0.1341	0.1668	0.4484	0.4356	0.5924	0.7716	0.137	0.1762	0.1859	0.1497	0.201
		0.1627	0.1321	0.197	0.3171	0.6043	0.772	0.741	0.1367	0.7657	0.7954	0.7245	0.8424
		0.139	0.1295	0.1458	0.4521	0.3449	0.7381	0.7227	0.1403	0.8636	0.97	0.97	0.97
		0.1265	0.2022	0.4289	0.6722	0.6848	0.7557	0.7313	0.7622	0.5556	0.7271	0.7998	0.4568
		0.1264	0.1591	0.4605	0.5176	0.6711	0.7308	0.7478	0.7008	0.7004	0.7859	0.5618	0.6846
		0.1257	0.1511	0.5041	0.6634	0.6018	0.685	0.7318	0.7538	0.7379	0.6145	0.6643	0.6039
		0.1258	0.1954	0.4492	0.5894	0.7601	0.5934	0.762	0.7494	0.7549	0.7	0.7259	0.7032
16:40:00	37.00	0.1396	0.1357	0.1879	0.4309	0.575	0.6131	0.6629	0.1381	0.1394	0.1459	0.1406	0.1441
		0.1431	0.1347	0.174	0.4666	0.4517	0.6212	0.7828	0.1369	0.1902	0.1996	0.1462	0.205
		0.1622	0.1304	0.2088	0.3317	0.6588	0.7935	0.7617	0.1367	0.7908	0.8371	0.7502	0.8705
		0.1392	0.1295	0.1493	0.4733	0.3641	0.7779	0.7435	0.1404	0.9142	0.9982	0.9982	0.9982
		0.1265	0.214	0.446	0.6986	0.704	0.7706	0.7465	0.7703	0.5869	0.7474	0.8237	0.4769
		0.1263	0.1647	0.4829	0.5424	0.6874	0.7396	0.7566	0.7205	0.7197	0.8126	0.5841	0.7123
		0.1256	0.156	0.5363	0.6967	0.6209	0.6996	0.7425	0.7681	0.7629	0.6338	0.6834	0.628
		0.1262	0.2202	0.4751	0.6125	0.786	0.6147	0.7807	0.7717	0.7637	0.7142	0.7486	0.7206
16:50:00	37.00	0.1391	0.1358	0.1953	0.4414	0.5926	0.631	0.6736	0.1381	0.139	0.1468	0.141	0.1447
		0.142	0.1342	0.1819	0.4831	0.4686	0.6468	0.7937	0.1369	0.2006	0.207	0.1486	0.2105
		0.1613	0.1308	0.2206	0.347	0.7135	0.8097	0.7813	0.1367	0.8095	0.885	0.7738	0.8834
		0.1384	0.1295	0.153	0.4951	0.3874	0.8059	0.7585	0.1402	0.9456	0.9456	0.9456	0.9456
		0.1269	0.2275	0.4653	0.7205	0.7247	0.7833	0.7601	0.7731	0.618	0.7643	0.8432	0.4918
		0.1263	0.1718	0.5003	0.5677	0.7051	0.7478	0.7652	0.7386	0.736	0.8285	0.6041	0.7328
		0.1255	0.1621	0.5738	0.7261	0.6403	0.7127	0.7547	0.7767	0.7858	0.654	0.7006	0.6487
		0.1259	0.2542	0.5004	0.6363	0.8117	0.6346	0.7993	0.7849	0.7725	0.7266	0.7713	0.734
17:00:00	37.00	0.1391	0.1354	0.204	0.4552	0.6096	0.6463	0.6837	0.1381	0.139	0.1469	0.1403	0.1441
		0.1424	0.1341	0.1911	0.5025	0.4839	0.6728	0.8063	0.1368	0.2113	0.2267	0.1531	0.2223
		0.1628	0.1306	0.2361	0.365	0.7598	0.8272	0.7984	0.1367	0.8313	0.921	0.7051	0.9112
		0.1385	0.1295	0.1579	0.5224	0.4104	0.8303	0.7734	0.1405	0.9801	0.9801	0.9801	0.9801
		0.1262	0.2418	0.4848	0.7437	0.7446	0.7936	0.7753	0.7777	0.6574	0.7865	0.8644	0.5171
		0.126	0.1795	0.5244	0.5924	0.7246	0.7546	0.7719	0.7576	0.7554	0.8471	0.6258	0.7563
		0.1257	0.1699	0.6333	0.7575	0.6574	0.7234	0.7626	0.7867	0.8043	0.6751	0.7177	0.6714
		0.1259	0.2909	0.5369	0.6594	0.8323	0.654	0.813	0.8034	0.7798	0.736	0.7892	0.746
17:10:00	37.00	0.1392	0.1365	0.2131	0.4682	0.6281	0.6579	0.6967	0.1381	0.139	0.146	0.1405	0.1447
		0.1417	0.134	0.2008	0.5208	0.4987	0.6963	0.8192	0.1369	0.2239	0.2626	0.1574	0.2425
		0.1608	0.1303	0.2514	0.3816	0.7959	0.84	0.8145	0.1366	0.8507	0.9556	0.7603	0.9323
		0.1378	0.1293	0.1632	0.5503	0.436	0.8484	0.7826	0.1403	0.921	0.9359	0.9528	0.9489
		0.1261	0.2545	0.5041	0.762	0.7653	0.8058	0.7922	0.7776	0.6987	0.8049	0.8817	0.5391
		0.126	0.1883	0.547	0.6165	0.7474	0.7636	0.7757	0.7702	0.7695	0.8605	0.6445	0.7694
		0.1256	0.1763	0.6932	0.7808	0.6739	0.7342	0.7699	0.7889	0.8203	0.6936	0.7306	0.6872
		0.1258	0.3237	0.578	0.6796	0.8558	0.6716	0.8263	0.8129	0.7851	0.7456	0.8072	0.7569
17:20:00	37.00	0.1391	0.135	0.224	0.4845	0.6591	0.6709	0.7117	0.1382	0.1392	0.1467	0.1406	0.1446
		0.1416	0.1342	0.2125	0.5435	0.5145	0.7222	0.836	0.137	0.243	0.2668	0.1627	0.2512
		0.1636	0.1303	0.2728	0.3986	0.8228	0.8548	0.8308	0.1367	0.8827	0.9951	0.7712	0.9622
		0.1379	0.1291	0.1704	0.5811	0.4632	0.8669	0.7925	0.1403	0.9235	0.9374	0.9616	0.9504
		0.1263	0.2714	0.5251	0.7834	0.7809	0.8223	0.8094	0.7839	0.7411	0.8282	0.8983	0.578
		0.1263	0.1985	0.5692	0.6454	0.7718	0.7773	0.7818	0.7838	0.7831	0.8793	0.6705	0.7888
		0.1255	0.1844	0.7554	0.8048	0.6883	0.7454	0.7732	0.7952	0.8298	0.7151	0.7406	0.707
		0.126	0.3541	0.6248	0.7092	0.8734	0.6911	0.8369	0.8257	0.7897	0.7531	0.8213	0.7684
17:30:00	37.00	0.1392	0.1351	0.2362	0.5002	0.6999	0.6802	0.7267	0.1381	0.1387	0.1456	0.1405	0.1504
		0.1415	0.1343	0.2242	0.5669	0.5292	0.7426	0.8502	0.1369	0.2655	0.2898	0.1681	0.268
		0.161	0.131	0.294	0.4155	0.8443	0.8648	0.8475	0.1366	0.8975	0.8975	0.7203	0.9776
		0.1381	0.1291	0.1774	0.6103	0.4934	0.8766	0.7971	0.1402	0.9252	0.9367	0.9634	0.9542
		0.1262	0.2866	0.546	0.8025	0.7967	0.8362	0.8256	0.7874	0.7778	0.8468	0.9095	0.6158
		0.1262	0.2097	0.5925	0.6708	0.7964	0.7899	0.7883	0.7929	0.7947	0.8949	0.6952	0.8037
		0.1254	0.1937	0.8081	0.8282	0.7019	0.7555	0.7757	0.7978	0.8405	0.7318	0.7489	0.721
		0.1256	0.3762	0.6724	0.7309	0.8895	0.7081	0.8488	0.8299	0.7977	0.761	0.8344	0.7799
17:40:00	37.00	0.1387	0.1355	0.2482	0.5197	0.7465	0.6882	0.7435	0.1381	0.1389	0.1459	0.1397	0.1437
		0.1415	0.1342	0.2368	0.6035	0.5412	0.7668	0.8626	0.1368	0.2798	0.3152	0.1762	0.2909
		0.1614	0.1302	0.3237	0.4345	0.8626	0.8781	0.8631	0.1366	0.9239	0.9239	0.9569	0.7569
		0.1384	0.1291	0.1862	0.6531	0.5258	0.8907	0.8035	0.1403	0.9235	0.9369	0.9593	0.9546
		0.1262	0.3029	0.5717	0.8276	0.8096	0.8506	0.8406	0.7947	0.8113	0.8697	0.9226	0.6698
		0.1264	0.2215	0.6225	0.696	0.8187	0.8033	0.7965	0.8001	0.8063	0.9091	0.7275	0.8234
		0.1256	0.2043	0.856	0.853	0.7139	0.7684	0.7777	0.8047	0.8508	0.7466	0.7554	0.736
		0.1256	0.3973	0.7173	0.762	0.9	0.7239	0.8597	0.8371	0.8058	0.7711	0.8444	0.7922
17:50:00	37.00	0.1386	0.1359	0.2631	0.544	0.794	0.7037	0.7584	0.1381	0.1386	0.1455	0.14	0.1413
		0.1415	0.1339	0.2496	0.6466	0.5545	0.7888	0.8736	0.1369	0.3003	0.3374	0.1835	0.311
		0.1589	0.1301	0.3533	0.4531	0.8819	0.8916	0.8761	0.1365	0.9482	0.9482	0.9143	0.7143
		0.1377	0.129	0.1947	0.6976	0.5646	0.9024	0.8082	0.1402	0.925	0.9393	0.9632	0.9549
		0.1262	0.3193	0.5958	0.8516	0.8215	0.8622	0.8522	0.8006	0.8359	0.8853	0.9362	0.7154
		0.1261	0.2355	0.6529	0.7195	0.8356	0.8148	0.8045	0.8045	0.8145	0.9204	0.7649	0.8409
		0.1255	0.2159	0.8865	0.8744	0.7275	0.7836	0.7814	0.8091	0.8612	0.757	0.7607	0.7455
		0.1256	0.4138	0.7659	0.7815	0.9087	0.7405	0.8692	0.8358	0.8145	0.7812	0.855	0.8037
18:00:00	37.00	0.1388	0.1349	0.2786	0.5727	0.834	0.723	0.7729	0.1382	0.1383	0.1452	0.1404	0.1404
		0.1411	0.1342	0.2628	0.704	0.5738	0.8135	0.8835	0.1369	0.3287	0.3684	0.1956	0.3411
		0.159	0.1303	0.3976	0.4712	0.8992	0.9069	0.8878	0.1367	0.9712	0.9712	0.7818	0.7818
		0.1378	0.1289	0.206	0.7478	0.6024	0.9147	0.8152	0.1406	0.9282	0.9404	0.9703	0.958
		0.1261	0.3367	0.6268	0.8736	0.8305	0.874	0.8635	0.8108	0.8551	0.9006	0.9506	0.7669
		0.126	0.2482	0.6937	0.7438	0.8495	0.8258	0.814	0.811	0.8221	0.9296	0.7996	0.8618
		0.1254	0.2268	0.91	0.8932	0.7422	0.7985	0.7857	0.8184	0.87	0.7693	0.7673	0.7571
		0.1253	0.4286	0.8035	0.8054	0.9151	0.7609	0.8772	0.8392	0.8219	0.7911	0.8629	0.815
18:10:00	37.00	0.1382	0.135	0.2949	0.5919	0.8576	0.7427	0.7864	0.1381	0.1386	0.1451	0.1403	0.148
		0.1404	0.1339	0.276	0.758	0.5994	0.8336	0.8912	0.1369	0.345	0.4017	0.216	0.3707
		0.1633	0.1301	0.4481	0.498	0.9121	0.9181	0.8984	0.1366	0.9934	0.9934	0.8415	0.8415
		0.1375	0.1288	0.2162	0.7867	0.6464	0.9252	0.8214	0.1401	0.9934	0.9934	0.8415	0.8415
		0.1262	0.3515	0.6648	0.8913	0.8396	0.8847	0.8721	0.8172	0.8673	0.9085	0.9612	0.7989
		0.1261	0.2621	0.7413	0.7657	0.863	0.8353	0.8222	0.8157	0.8302	0.9357	0.8261	0.8789
		0.1255	0.2381	0.9257	0.9053	0.7614	0.8125	0.7901	0.8248	0.8787	0.7809	0.7751	0.7637
		0.1254	0.4461	0.844	0.826	0.9223	0.7815	0.886	0.839	0.8314	0.8017	0.8741	0.8268
18:20:00	37.00	0.1383	0.1346	0.313	0.6149	0.8807	0.7681	0.7995	0.1382	0.1383	0.1457	0.1404	0.1464
		0.1409	0.1338	0.2905	0.8112	0.6362	0.8517	0.8984	0.1369	0.3755	0.424	0.2217	0.3957
		0.1616	0.1296	0.5169	0.5397	0.9222	0.931	0.9069	0.1366	0.8787	0.98	0.9103	0.9103
		0.1375	0.1285	0.2296	0.8241	0.6886	0.9354	0.8289	0.1403	0.9291	0.9445	0.9445	0.9445
		0.1263	0.3695	0.7154	0.9034	0.8459	0.894	0.8804	0.8285	0.8808	0.9177	0.9685	0.8284
		0.1258	0.2772	0.794	0.7893	0.8713	0.8451	0.8317	0.8229	0.8396	0.9414	0.8479	0.8939
		0.1252	0.2522	0.9384	0.913	0.7816	0.8248	0.7962	0.8344	0.8862	0.7945	0.783	0.7715
		0.1253	0.4646	0.8783	0.8526	0.9265	0.8028	0.8925	0.8443	0.8388	0.8121	0.8809	0.8373
18:30:00	37.00	0.138	0.1359	0.3306	0.631	0.8939	0.7936	0.8095	0.138	0.1382	0.145	0.1401	0.1485
		0.1408	0.1353	0.3132	0.8569	0.6941	0.8652	0.9026	0.1369	0.4045	0.4504	0.2353	0.4216
		0.1586	0.1296	0.5844	0.5995	0.9296	0.9383	0.9141	0.1365	0.9638	0.9638	0.9638	0.9638
		0.1376	0.1286	0.2426	0.8584	0.7303	0.9414	0.8347	0.1401	0.9319	0.947	0.9721	0.9616
		0.126	0.3871	0.7712	0.9128	0.8513	0.902	0.8872	0.835	0.8915	0.923	0.9748	0.8455
		0.126	0.2951	0.8399	0.8142	0.8803	0.8531	0.8393	0.8273	0.8502	0.945	0.8626	0.9052
		0.1253	0.2654	0.9454	0.9181	0.8002	0.8356	0.8013	0.8407	0.8927	0.8058	0.7917	0.7761
		0.1256	0.4865	0.9037	0.8786	0.9311	0.8179	0.8994	0.8457	0.8471	0.8216	0.8888	0.8463
18:40:00	37.00	0.138	0.1355	0.3498	0.6509	0.9043	0.8171	0.8186	0.1381	0.1381	0.1452	0.1397	0.1444
		0.1407	0.1349	0.3491	0.8927	0.7529	0.8769	0.9069	0.1369	0.432	0.4811	0.2553	0.4549
		0.159	0.1307	0.6566	0.6703	0.935	0.9466	0.919	0.1365	0.9319	0.9489	0.9683	0.9631
		0.1374	0.1286	0.2573	0.8889	0.7702	0.948	0.8426	0.1402	0.9319	0.9489	0.9683	0.9631
		0.126	0.4031	0.8253	0.9215	0.8568	0.9085	0.8938	0.844	0.9045	0.9314	0.9794	0.8684
		0.1257	0.311	0.8736	0.8402	0.8883	0.8597	0.847	0.8341	0.8613	0.9491	0.8739	0.9133
		0.1252	0.2781	0.9546	0.9229	0.8173	0.8444	0.8075	0.8495	0.8983	0.8177	0.8005	0.7861
		0.1253	0.5152	0.9302	0.9031	0.9332	0.8336	0.9043	0.8519	0.8543	0.8305	0.8935	0.8545
18:50:00	37.00	0.1382	0.1357	0.3689	0.6628	0.9123	0.8412	0.8252	0.1381	0.1379	0.1509	0.14	0.1469
		0.1406	0.135	0.4035	0.9153	0.7954	0.8863	0.9104	0.1369	0.4544	0.5117	0.2677	0.4847
		0.1572	0.1296	0.7122	0.7346	0.9392	0.9512	0.9228	0.1366	0.9346	0.949	0.9773	0.9627
		0.1371	0.1285	0.2711	0.9125	0.811	0.952	0.8491	0.14	0.9346	0.949	0.9773	0.9627
		0.126	0.4203	0.8654	0.9269	0.8616	0.9146	0.8978	0.8489	0.9136	0.9381	0.9849	0.8851
		0.126	0.3278	0.8961	0.8605	0.8941	0.8649	0.8536	0.8383	0.8712	0.951	0.8841	0.919
		0.1253	0.2917	0.9583	0.9266	0.8309	0.8529	0.8145	0.855	0.9021	0.828	0.8102	0.7934
		0.1254	0.5536	0.9525	0.9214	0.9364	0.8452	0.9091	0.8538	0.8607	0.8387	0.899	0.8615
19:00:00	37.00	0.1384	0.1354	0.3886	0.686	0.9198	0.8612	0.834	0.1382	0.1382	0.145	0.1404	0.1453
		0.1404	0.1349	0.4682	0.9299	0.8254	0.8946	0.9149	0.1369	0.4841	0.5517	0.2916	0.5194
		0.1581	0.1314	0.7621	0.798	0.9424	0.9574	0.9296	0.1366	0.9341	0.9497	0.9781	0.9654
		0.1372	0.1284	0.2888	0.9298	0.8456	0.9548	0.8572	0.1406	0.9341	0.9497	0.9781	0.9654
		0.1267	0.4362	0.894	0.9325	0.8637	0.9204	0.9037	0.8569	0.9218	0.9449	0.9901	0.9016
		0.1258	0.3458	0.9138	0.8792	0.8979	0.871	0.8604	0.8453	0.8806	0.9541	0.8924	0.9257
		0.1253	0.3095	0.9612	0.9304	0.8433	0.8605	0.8213	0.8621	0.9074	0.8387	0.8199	0.805
		0.1254	0.6036	0.9745	0.9366	0.9369	0.8568	0.9138	0.8597	0.8669	0.8465	0.9033	0.8684
19:10:00	37.00	0.138	0.1356	0.4072	0.714	0.9233	0.8803	0.8409	0.1381	0.1379	0.1446	0.1401	0.1502
		0.1407	0.1349	0.5431	0.9387	0.8437	0.9002	0.9174	0.1369	0.5078	0.5811	0.3333	0.553
		0.1569	0.1292	0.7981	0.8504	0.9442	0.9605	0.9341	0.1365	0.9369	0.9511	0.9837	0.9666
		0.1368	0.1283	0.3072	0.942	0.8757	0.9574	0.8652	0.1387	0.9369	0.9511	0.9837	0.9666
		0.1258	0.4577	0.9148	0.9362	0.8677	0.925	0.9081	0.8624	0.9295	0.9509	0.9934	0.9135
		0.1256	0.363	0.9288	0.8934	0.9014	0.8754	0.866	0.8491	0.8883	0.9556	0.8989	0.9299
		0.125	0.3266	0.9644	0.932	0.8537	0.8652	0.8289	0.8663	0.9118	0.8473	0.8313	0.8147
		0.1252	0.6631	0.9938	0.9462	0.9397	0.8643	0.9167	0.8632	0.8736	0.8526	0.9079	0.8741
19:20:00	37.00	0.138	0.1358	0.4254	0.7438	0.9278	0.8953	0.8447	0.1381	0.1377	0.1452	0.14	0.1461
		0.1399	0.1349	0.6117	0.9432	0.8577	0.9045	0.9201	0.1369	0.5354	0.6115	0.344	0.592
		0.1586	0.1294	0.8186	0.8853	0.9454	0.9637	0.9365	0.1365	0.9383	0.953	0.9892	0.9713
		0.1365	0.1282	0.3241	0.9492	0.898	0.9593	0.8684	0.1403	0.9383	0.953	0.9892	0.9713
		0.126	0.4873	0.9287	0.9393	0.8695	0.9288	0.9114	0.8678	0.9339	0.9553	0.9942	0.9224
		0.1257	0.3819	0.9365	0.9036	0.9035	0.8801	0.8705	0.8545	0.8952	0.9559	0.904	0.9326
		0.1252	0.3444	0.9661	0.9333	0.8603	0.871	0.834	0.8697	0.9142	0.8545	0.8393	0.8239
		0.1252	0.7201	0.9661	0.9561	0.9399	0.8726	0.9206	0.8684	0.877	0.8585	0.9105	0.8794
19:30:00	37.00	0.1381	0.1355	0.4436	0.7779	0.9324	0.9105	0.8496	0.1382	0.1376	0.1445	0.1398	0.1495
		0.1399	0.1346	0.6727	0.9498	0.868	0.9081	0.9218	0.137	0.5708	0.6576	0.363	0.6355
		0.158	0.1304	0.8358	0.9113	0.9472	0.9664	0.9389	0.1365	0.9378	0.9538	0.989	0.9701
		0.1364	0.1281	0.3421	0.9581	0.9171	0.9593	0.8757	0.1401	0.9378	0.9538	0.989	0.9701
		0.1259	0.5313	0.941	0.9406	0.8715	0.9325	0.9147	0.8732	0.9393	0.9588	0.9963	0.9308
		0.1256	0.4025	0.9431	0.9103	0.9068	0.8833	0.8745	0.8591	0.9006	0.958	0.9084	0.9358
		0.1248	0.3717	0.9666	0.9349	0.8676	0.8749	0.8397	0.8722	0.9163	0.8611	0.8472	0.8323
		0.1253	0.7835	0.9666	0.9624	0.9405	0.878	0.9234	0.8722	0.8823	0.8632	0.913	0.8835
19:40:00	37.00	0.1377	0.1353	0.4613	0.803	0.9342	0.9219	0.8528	0.1381	0.1376	0.1449	0.1398	0.1432
		0.1397	0.1345	0.7178	0.9509	0.8755	0.9112	0.9232	0.1369	0.599	0.6804	0.392	0.67
		0.1571	0.1293	0.851	0.9285	0.9479	0.9681	0.9418	0.1365	0.9797	0.9797	0.9797	0.9797
		0.1361	0.128	0.3601	0.9624	0.9293	0.9616	0.88	0.1404	0.9399	0.9399	0.9399	0.9399
		0.1259	0.5967	0.9486	0.9421	0.874	0.9361	0.9174	0.8771	0.9414	0.9608	0.9972	0.937
		0.1255	0.4223	0.9488	0.9172	0.9089	0.8865	0.8782	0.8631	0.9056	0.9584	0.9117	0.9382
		0.125	0.4109	0.9671	0.936	0.8722	0.878	0.8452	0.874	0.9185	0.8668	0.8552	0.8399
		0.1252	0.8277	0.9671	0.9673	0.9413	0.8832	0.9257	0.8768	0.885	0.8682	0.9159	0.8866
19:50:00	37.00	0.1384	0.1355	0.485	0.8269	0.9364	0.9347	0.8559	0.1381	0.1373	0.1444	0.1402	0.1466
		0.14	0.1348	0.749	0.9533	0.8833	0.9139	0.9252	0.1369	0.63	0.7135	0.7135	0.7144
		0.1581	0.1306	0.8611	0.9363	0.9485	0.9706	0.9438	0.1364	0.9833	0.9833	0.9833	0.9833
		0.1363	0.1277	0.381	0.9653	0.9369	0.9618	0.8835	0.1386	0.9392	0.9392	0.9392	0.9392
		0.1255	0.6702	0.9519	0.943	0.8767	0.939	0.9193	0.8794	0.9422	0.961	0.9979	0.9391
		0.1256	0.4493	0.9503	0.92	0.9113	0.8902	0.881	0.8659	0.9091	0.9575	0.9153	0.9412
		0.125	0.4729	0.9637	0.9369	0.8771	0.8821	0.8507	0.8727	0.9205	0.8717	0.862	0.8467
		0.1249	0.8656	0.9637	0.9686	0.9427	0.8878	0.9289	0.8777	0.8894	0.8727	0.9193	0.8907
20:00:00	37.00	0.1378	0.1353	0.5239	0.8511	0.9381	0.9442	0.8579	0.138	0.1373	0.1445	0.1394	0.1459
		0.1398	0.1346	0.7872	0.9509	0.8872	0.9178	0.9257	0.1369	0.6643	0.7517	0.7517	0.7664
		0.1567	0.1293	0.879	0.9481	0.9496	0.9721	0.9451	0.1364	0.9858	0.9858	0.9858	0.9858
		0.1363	0.1279	0.4056	0.9693	0.9457	0.9635	0.8894	0.1402	0.9396	0.9396	0.9396	0.9396
		0.1258	0.7422	0.9573	0.9452	0.8774	0.9415	0.9216	0.8836	0.9473	0.9639	0.9476	0.9446
		0.1256	0.4906	0.9553	0.9253	0.9131	0.8928	0.884	0.8701	0.9122	0.9602	0.9193	0.943
		0.1249	0.5632	0.9671	0.9378	0.8812	0.8842	0.8544	0.874	0.9199	0.8756	0.8677	0.8534
		0.125	0.9113	0.9671	0.975	0.9429	0.892	0.93	0.883	0.8923	0.8766	0.9197	0.8931
20:10:00	37.00	0.1376	0.1352	0.5717	0.8677	0.9384	0.9519	0.8603	0.1381	0.1371	0.1445	0.1397	0.1481
		0.1391	0.1347	0.8242	0.9474	0.8904	0.919	0.9266	0.1371	0.699	0.7863	0.7863	0.8091
		0.1574	0.1293	0.8968	0.9521	0.95	0.9735	0.947	0.1364	0.988	0.988	0.988	0.988
		0.1364	0.1279	0.4356	0.9686	0.9502	0.9635	0.8925	0.1385	0.9414	0.9414	0.9414	0.9414
		0.1255	0.8027	0.9575	0.9453	0.8799	0.9434	0.9227	0.8842	0.9482	0.9635	0.9635	0.9449
		0.1253	0.5454	0.9575	0.9271	0.9151	0.895	0.887	0.8718	0.9151	0.9599	0.9228	0.9449
		0.1248	0.6441	0.9656	0.9392	0.8845	0.8868	0.8588	0.8717	0.921	0.8795	0.8746	0.8582
		0.125	0.9479	0.9656	0.975	0.9436	0.8957	0.9314	0.8838	0.8957	0.8803	0.9231	0.8963
20:20:00	37.00	0.1377	0.1349	0.6384	0.8841	0.9404	0.9596	0.8633	0.138	0.1371	0.1454	0.1396	0.1443
		0.14	0.1349	0.846	0.9472	0.8932	0.9217	0.9274	0.1369	0.7298	0.8231	0.8231	0.8492
		0.1562	0.1293	0.9157	0.9584	0.9502	0.9751	0.9477	0.1365	0.9881	0.9577	0.9884	0.9789
		0.1361	0.1276	0.4805	0.968	0.9552	0.9659	0.8969	0.1403	0.9439	0.9577	0.9884	0.9789
		0.1255	0.8447	0.959	0.9479	0.8818	0.9445	0.9236	0.8879	0.9509	0.9648	0.9648	0.948
		0.1255	0.6137	0.9597	0.9301	0.9165	0.8971	0.8882	0.8744	0.9172	0.9618	0.9253	0.9461
		0.1249	0.7139	0.9662	0.9399	0.887	0.8887	0.8625	0.8724	0.9198	0.8833	0.8798	0.8645
		0.1247	0.9683	0.9662	0.9775	0.9427	0.898	0.932	0.8866	0.8975	0.8825	0.924	0.8985
20:30:00	37.00	0.1378	0.1352	0.7015	0.8935	0.942	0.9674	0.8637	0.1382	0.1373	0.1456	0.1402	0.148
		0.139	0.1346	0.8645	0.9453	0.8929	0.9233	0.9275	0.1369	0.7611	0.8522	0.8522	0.8809
		0.1554	0.1294	0.9254	0.9633	0.9512	0.9749	0.9479	0.1364	0.9883	0.9883	0.9883	0.9883
		0.1362	0.1278	0.5396	0.9656	0.9592	0.9668	0.8992	0.1401	0.9475	0.9605	0.9735	0.9865
		0.1254	0.8744	0.96	0.9483	0.8831	0.9447	0.9242	0.8881	0.9539	0.9642	0.9642	0.9473
		0.1253	0.6827	0.9619	0.9327	0.9173	0.8985	0.8888	0.8749	0.9191	0.9626	0.9277	0.9469
		0.1249	0.7666	0.9673	0.9399	0.8891	0.8904	0.8649	0.8713	0.9181	0.8843	0.8834	0.8675
		0.1249	0.9942	0.9673	0.979	0.9429	0.8998	0.9316	0.8851	0.8989	0.8841	0.925	0.8999
20:40:00	37.00	0.1374	0.1353	0.7541	0.9069	0.9434	0.9745	0.8657	0.1381	0.1367	0.1445	0.1398	0.1498
		0.1392	0.1349	0.8677	0.9443	0.8959	0.9245	0.928	0.1369	0.8994	0.8994	0.8994	0.8994
		0.1556	0.1311	0.9352	0.9654	0.9519	0.9752	0.9487	0.1364	0.9891	0.8881	0.9917	0.9846
		0.1362	0.1274	0.6038	0.963	0.9597	0.9676	0.9027	0.1389	0.9507	0.962	0.9917	0.9846
		0.1255	0.8949	0.9603	0.9486	0.8833	0.9467	0.9245	0.8895	0.9548	0.9639	0.9639	0.9487
		0.1253	0.7442	0.9631	0.934	0.9176	0.9001	0.89	0.8766	0.9211	0.9619	0.93	0.9482
		0.1247	0.8069	0.9659	0.9413	0.8898	0.8918	0.8683	0.8722	0.9171	0.887	0.8872	0.8725
		0.1247	0.8069	0.9659	0.9793	0.9413	0.9025	0.9312	0.8855	0.9	0.8864	0.9256	0.901
20:50:00	37.00	0.1378	0.1355	0.7925	0.9147	0.9435	0.9815	0.8687	0.1381	0.137	0.145	0.1399	0.1479
		0.1393	0.1359	0.856	0.9445	0.8989	0.9243	0.9298	0.137	0.8336	0.9192	0.9192	0.974
		0.1545	0.1297	0.9431	0.965	0.9518	0.9764	0.9511	0.1363	0.9518	0.9618	0.9908	0.983
		0.1357	0.1273	0.6685	0.9591	0.9587	0.9659	0.9061	0.14	0.9518	0.9618	0.9908	0.983
		0.1255	0.9027	0.957	0.9482	0.8851	0.9478	0.9256	0.8889	0.954	0.9625	0.9988	0.9469
		0.1254	0.7882	0.9606	0.9344	0.9191	0.9013	0.8912	0.8762	0.921	0.9592	0.9311	0.9496
		0.1247	0.8351	0.9633	0.9413	0.8925	0.893	0.8707	0.8702	0.9171	0.8892	0.892	0.8756
		0.1246	0.8351	0.9633	0.9771	0.9436	0.9042	0.9314	0.8843	0.9013	0.889	0.9276	0.9022
21:00:00	37.00	0.1374	0.1351	0.8118	0.9166	0.9449	0.9878	0.8687	0.1382	0.1366	0.1439	0.1401	0.1517
		0.1388	0.135	0.8616	0.9396	0.899	0.9286	0.9282	0.1369	0.8665	0.9532	0.9532	0.9532
		0.156	0.13	0.9443	0.9674	0.9513	0.9775	0.9515	0.1364	0.9879	0.9879	0.9879	0.9879
		0.1361	0.1277	0.7129	0.9634	0.9608	0.9691	0.9097	0.1403	0.9523	0.9523	0.9523	0.9523
		0.1256	0.9049	0.9573	0.9505	0.887	0.9483	0.9248	0.8896	0.9562	0.9635	0.9973	0.947
		0.1253	0.8178	0.9629	0.9358	0.9196	0.9023	0.8917	0.8776	0.923	0.9604	0.9318	0.9507
		0.1246	0.8653	0.9637	0.9408	0.8949	0.8942	0.8724	0.8706	0.9166	0.8915	0.894	0.8793
		0.1247	0.8653	0.9637	0.9783	0.9432	0.9057	0.9303	0.8841	0.9031	0.89	0.9284	0.904
21:10:00	37.00	0.1373	0.1353	0.8345	0.9227	0.9448	0.9933	0.8696	0.1379	0.1366	0.1443	0.1397	0.1512
		0.1385	0.1353	0.8587	0.9394	0.9009	0.9278	0.9302	0.1369	0.9033	0.9751	0.9751	0.9751
		0.1558	0.1299	0.9504	0.9664	0.9516	0.977	0.9505	0.1363	0.988	0.988	0.988	0.988
		0.1356	0.1271	0.7545	0.957	0.9591	0.967	0.9092	0.1398	0.9538	0.9538	0.9538	0.9538
		0.1253	0.9082	0.9554	0.9497	0.8875	0.9487	0.9253	0.8883	0.9551	0.9614	0.9952	0.9435
		0.125	0.84	0.9623	0.9353	0.9207	0.9028	0.8916	0.8767	0.9236	0.9587	0.9319	0.9502
		0.1245	0.8812	0.9623	0.9414	0.8951	0.8953	0.8744	0.8677	0.9156	0.8921	0.8961	0.88
		0.1248	0.8812	0.9623	0.9771	0.9426	0.9069	0.9302	0.8809	0.9019	0.8911	0.9282	0.9041
21:20:00	37.00	0.137	0.1357	0.8481	0.9308	0.9458	0.9977	0.8702	0.1381	0.1364	0.144	0.1392	0.1472
		0.1387	0.1353	0.8682	0.9343	0.8992	0.9276	0.9286	0.1368	0.9292	0.9292	0.9292	0.9292
		0.1559	0.1308	0.9559	0.9699	0.9513	0.9772	0.9503	0.1364	0.9873	0.9873	0.9873	0.9873
		0.1354	0.1273	0.7867	0.9556	0.963	0.9688	0.9115	0.1403	0.9571	0.9571	0.9571	0.9571
		0.1254	0.9097	0.9566	0.9503	0.8881	0.9487	0.9228	0.8899	0.9566	0.9618	0.9946	0.9458
		0.125	0.8647	0.9659	0.9374	0.9205	0.9036	0.8914	0.876	0.9235	0.9586	0.9327	0.9508
		0.1245	0.8975	0.9643	0.9414	0.8956	0.8953	0.8748	0.8683	0.9134	0.892	0.8974	0.8824
		0.1246	0.8975	0.9643	0.9786	0.9406	0.9068	0.9282	0.8822	0.9009	0.891	0.9273	0.9036
21:30:00	37.00	0.1375	0.1356	0.855	0.9327	0.9469	0.929	0.8694	0.1379	0.1363	0.145	0.1396	0.148
		0.139	0.1355	0.8686	0.9338	0.899	0.929	0.9281	0.1369	0.9807	0.9807	0.7632	0.7632
		0.1551	0.1308	0.9565	0.969	0.9511	0.976	0.9487	0.1363	0.9864	0.9864	0.9864	0.9864
		0.1355	0.1269	0.8161	0.9509	0.9633	0.9688	0.9127	0.1371	0.9594	0.9594	0.9594	0.9594
		0.1257	0.9102	0.9562	0.9496	0.889	0.9476	0.9229	0.8885	0.9576	0.9614	0.9944	0.9441
		0.1251	0.8799	0.9664	0.9371	0.9207	0.9032	0.8903	0.8744	0.9244	0.9584	0.9343	0.9502
		0.1247	0.9042	0.9637	0.9421	0.8964	0.8951	0.8746	0.8665	0.9117	0.8921	0.8987	0.8821
		0.1246	0.9042	0.9637	0.9775	0.9396	0.9073	0.927	0.8807	0.9008	0.8911	0.9277	0.9028
21:40:00	37.00	0.1373	0.1357	0.8575	0.9351	0.9474	0.9296	0.8708	0.138	0.1366	0.1438	0.1391	0.1439
		0.1385	0.1359	0.8674	0.9308	0.8996	0.9296	0.9279	0.1369	0.9292	0.9292	0.9292	0.9292
		0.1549	0.1326	0.9607	0.969	0.952	0.9764	0.9492	0.1363	0.9862	0.9862	0.9862	0.9862
		0.135	0.1272	0.8422	0.9513	0.9638	0.9699	0.9137	0.1365	0.9601	0.9601	0.9601	0.9601
		0.1255	0.9108	0.9559	0.9507	0.8894	0.9472	0.9211	0.8892	0.9575	0.9607	0.9944	0.9451
		0.125	0.8909	0.9674	0.9386	0.9201	0.9035	0.8899	0.874	0.9239	0.9585	0.9372	0.952
		0.1244	0.9087	0.9646	0.9427	0.8962	0.8957	0.8749	0.8665	0.9113	0.8924	0.9015	0.8852
		0.1245	0.9087	0.9646	0.9782	0.9393	0.9085	0.9256	0.8801	0.9005	0.8917	0.9282	0.9051
21:50:00	37.00	0.1372	0.1362	0.8584	0.9394	0.9488	0.9291	0.8719	0.138	0.1364	0.1449	0.1401	0.1511
		0.1384	0.1362	0.8714	0.93	0.9009	0.9291	0.928	0.1369	0.9292	0.9292	0.9292	0.9292
		0.1546	0.1337	0.9629	0.9677	0.953	0.9291	0.9485	0.1363	0.9862	0.9862	0.9862	0.9862
		0.135	0.1288	0.8644	0.95	0.9643	0.9291	0.9152	0.1394	0.9603	0.9603	0.9603	0.9603
		0.1253	0.9113	0.9561	0.9501	0.8896	0.9291	0.9209	0.8882	0.9582	0.9604	0.9947	0.9448
		0.1251	0.9	0.9668	0.939	0.9211	0.9291	0.8888	0.8732	0.9248	0.9575	0.9389	0.9529
		0.1245	0.9151	0.9645	0.9433	0.898	0.9291	0.8756	0.8649	0.9106	0.8924	0.903	0.8877
		0.1248	0.9151	0.9645	0.9763	0.9393	0.9291	0.9243	0.8775	0.9011	0.8928	0.9293	0.9055
22:00:00	37.00	0.1368	0.1365	0.8598	0.9403	0.9488	0.93	0.8711	0.138	0.1361	0.1441	0.1395	0.1483
		0.1384	0.137	0.8628	0.9272	0.9017	0.93	0.9281	0.137	0.9299	0.9299	0.9299	0.9299
		0.1554	0.1331	0.9623	0.967	0.9532	0.9763	0.9478	0.1363	0.9854	0.9854	0.9854	0.9854
		0.1354	0.1271	0.8803	0.9488	0.9638	0.9691	0.9164	0.1381	0.9641	0.9641	0.9641	0.9641
		0.1252	0.9105	0.9558	0.9502	0.8909	0.9478	0.9198	0.8872	0.957	0.9594	0.993	0.943
		0.1251	0.9049	0.9668	0.9397	0.9206	0.9037	0.8884	0.8722	0.9242	0.9567	0.9383	0.9529
		0.1246	0.9169	0.9629	0.944	0.8974	0.8968	0.8754	0.8642	0.9094	0.8934	0.9051	0.8889
		0.1247	0.9169	0.9629	0.9764	0.9379	0.9089	0.9234	0.8757	0.9002	0.8934	0.9296	0.9054
22:10:00	37.00	0.137	0.1371	0.8569	0.9394	0.9491	0.9299	0.8717	0.1379	0.136	0.1433	0.1389	0.1425
		0.1381	0.138	0.8547	0.9238	0.9008	0.9299	0.9271	0.1368	0.9299	0.9299	0.9299	0.9299
		0.1547	0.1342	0.9619	0.9653	0.9522	0.9756	0.9471	0.1363	0.9832	0.9832	0.9832	0.9832
		0.1351	0.1269	0.8894	0.9441	0.9647	0.9689	0.9158	0.1374	0.9631	0.9631	0.9631	0.9631
		0.1254	0.9105	0.9559	0.9496	0.8916	0.9466	0.9186	0.8852	0.9568	0.9576	0.9923	0.9419
		0.1251	0.9095	0.9682	0.9403	0.9214	0.9044	0.8882	0.87	0.9235	0.9556	0.9393	0.9527
		0.1246	0.9209	0.9631	0.9437	0.8993	0.8964	0.8762	0.8617	0.908	0.892	0.9059	0.8881
		0.1244	0.9209	0.9631	0.976	0.9373	0.9085	0.922	0.8725	0.8993	0.8939	0.9295	0.9058
22:20:00	37.00	0.1371	0.1374	0.8561	0.9373	0.9492	0.9301	0.8718	0.1379	0.1361	0.1449	0.1387	0.1412
		0.1381	0.1384	0.8426	0.9188	0.8981	0.9301	0.9259	0.137	0.929	0.929	0.929	0.929
		0.1539	0.137	0.9633	0.9649	0.9516	0.9755	0.9456	0.1363	0.9836	0.9836	0.9836	0.9836
		0.1345	0.1267	0.8999	0.9404	0.9653	0.9691	0.9164	0.1431	0.9658	0.9658	0.9658	0.9658
		0.1252	0.91	0.954	0.9496	0.892	0.9456	0.9166	0.8834	0.9561	0.9581	0.9927	0.9417
		0.1249	0.911	0.9714	0.9412	0.9204	0.9035	0.8858	0.8678	0.923	0.9546	0.9414	0.9538
		0.1245	0.923	0.9636	0.9432	0.8992	0.8961	0.8744	0.8595	0.9053	0.8904	0.9072	0.8903
		0.1247	0.923	0.9636	0.9775	0.9366	0.9085	0.9198	0.8717	0.898	0.8952	0.9299	0.9072
22:30:00	37.00	0.1371	0.1383	0.8514	0.9383	0.948	0.9292	0.8701	0.1379	0.1359	0.1451	0.139	0.1424
		0.1383	0.1396	0.8414	0.9189	0.8983	0.9292	0.9254	0.1369	0.929	0.929	0.929	0.929
		0.1561	0.1373	0.9613	0.9629	0.9514	0.974	0.9441	0.1362	0.9835	0.9835	0.9835	0.9835
		0.1349	0.1266	0.9039	0.9383	0.9648	0.9691	0.9159	0.1453	0.9669	0.9669	0.9669	0.9669
		0.1252	0.9124	0.954	0.9495	0.8926	0.9452	0.9154	0.8814	0.9553	0.9577	0.9938	0.941
		0.1247	0.9107	0.9696	0.9411	0.9205	0.9036	0.8854	0.8668	0.922	0.9543	0.9438	0.9557
		0.1244	0.9209	0.9626	0.9442	0.8999	0.8952	0.8741	0.8596	0.9053	0.8902	0.9092	0.892
		0.1246	0.9209	0.9626	0.9754	0.9367	0.9078	0.9195	0.8688	0.8971	0.8959	0.9307	0.9069
22:40:00	37.00	0.1364	0.1391	0.8463	0.9403	0.947	0.929	0.871	0.1379	0.136	0.1433	0.139	0.1424
		0.1378	0.1412	0.8342	0.9207	0.8992	0.929	0.9242	0.1369	0.929	0.9293	0.9293	0.9293
		0.1546	0.1394	0.963	0.962	0.9511	0.9744	0.9432	0.1364	0.9823	0.9985	0.9985	0.9985
		0.1353	0.127	0.9111	0.9382	0.9643	0.9686	0.9166	0.147	0.9688	0.9797	0.9797	0.9797
		0.1251	0.9128	0.953	0.9494	0.8923	0.944	0.9134	0.8804	0.955	0.9568	0.9945	0.9409
		0.1246	0.903	0.9703	0.9411	0.9206	0.9032	0.8841	0.8653	0.921	0.9529	0.9457	0.9564
		0.1244	0.9078	0.9626	0.9435	0.8998	0.8948	0.872	0.8571	0.9034	0.8885	0.9114	0.8934
		0.1243	0.9078	0.9626	0.9754	0.9355	0.9073	0.9168	0.867	0.8944	0.8963	0.9318	0.9071
22:50:00	37.00	0.1366	0.1405	0.8442	0.9354	0.9467	0.9286	0.8697	0.1379	0.1357	0.1455	0.139	0.1417
		0.1381	0.1426	0.8263	0.9201	0.8984	0.9286	0.9221	0.1369	0.9299	0.9294	0.9294	0.9294
		0.1544	0.142	0.9606	0.9603	0.9502	0.9726	0.9405	0.1361	0.9815	0.9975	0.9975	0.9975
		0.1349	0.1266	0.9125	0.9342	0.9646	0.9675	0.9166	0.1464	0.9677	0.9811	0.9811	0.9811
		0.1253	0.9124	0.9516	0.9491	0.8939	0.9431	0.9119	0.8783	0.9539	0.9553	0.9935	0.9382
		0.1247	0.8975	0.9699	0.9409	0.9216	0.9023	0.8827	0.8632	0.9203	0.9522	0.9461	0.9563
		0.1244	0.9008	0.9612	0.9435	0.9009	0.8932	0.8704	0.856	0.9021	0.8875	0.9122	0.8934
		0.1243	0.9008	0.9612	0.975	0.9344	0.9056	0.9147	0.8632	0.8927	0.8964	0.9314	0.9053
23:00:00	37.00	0.1367	0.1418	0.8434	0.9353	0.9473	0.9278	0.8701	0.1382	0.1357	0.1433	0.1387	0.1417
		0.1377	0.145	0.825	0.9157	0.8978	0.9278	0.9212	0.1369	0.9289	0.9294	0.9294	0.9294
		0.1531	0.1462	0.9591	0.9594	0.9498	0.9725	0.9403	0.1363	0.9798	0.9956	0.9956	0.9956
		0.1349	0.1268	0.9141	0.9327	0.9636	0.9678	0.9165	0.1464	0.9692	0.9847	0.9847	0.9847
		0.1251	0.9133	0.9506	0.9493	0.8937	0.9424	0.9105	0.8765	0.953	0.9542	0.9932	0.9377
		0.1247	0.8966	0.9697	0.9409	0.9208	0.9012	0.882	0.8624	0.9189	0.9499	0.9465	0.9571
		0.1244	0.9013	0.9611	0.9431	0.9012	0.893	0.8701	0.8547	0.9006	0.8853	0.9137	0.8946
		0.1243	0.9013	0.9611	0.9747	0.9333	0.9043	0.9137	0.8623	0.8905	0.8961	0.931	0.9048
23:10:00	37.00	0.1366	0.1431	0.8489	0.9309	0.9445	0.9274	0.8698	0.1378	0.1357	0.144	0.1388	0.1432
		0.138	0.1475	0.8082	0.9222	0.8993	0.9274	0.9206	0.1368	0.9289	0.9294	0.9294	0.9294
		0.1566	0.1511	0.9586	0.9545	0.9497	0.9725	0.939	0.1361	0.9794	0.996	0.996	0.996
		0.1347	0.1265	0.9155	0.9347	0.9601	0.965	0.9164	0.1458	0.9676	0.9865	0.9865	0.9865
		0.1251	0.9144	0.9501	0.9476	0.8955	0.942	0.9099	0.8736	0.9504	0.9521	0.9918	0.9346
		0.1246	0.892	0.9668	0.9401	0.9219	0.9008	0.8817	0.8606	0.9172	0.9479	0.9462	0.9574
		0.1243	0.8983	0.9585	0.9434	0.9021	0.8924	0.8693	0.8521	0.9008	0.885	0.9147	0.8954
		0.1241	0.8983	0.9585	0.9725	0.9337	0.9043	0.9139	0.8582	0.8898	0.8964	0.9322	0.9042
23:20:00	37.00	0.1366	0.1451	0.8479	0.927	0.9444	0.9273	0.87	0.1379	0.1358	0.1463	0.1392	0.1427
		0.1378	0.151	0.7993	0.9134	0.8965	0.9273	0.9191	0.1368	0.929	0.9294	0.9294	0.9294
		0.1531	0.1556	0.9565	0.9508	0.9482	0.9719	0.9364	0.1362	0.9788	0.9936	0.9936	0.9936
		0.1342	0.1265	0.9185	0.9292	0.9587	0.9652	0.9164	0.1464	0.9788	0.9936	0.9936	0.9936
		0.1249	0.9136	0.9473	0.9478	0.896	0.9405	0.9076	0.872	0.9485	0.9513	0.9903	0.9328
		0.1249	0.8906	0.9675	0.9394	0.9208	0.8999	0.8796	0.8586	0.9161	0.9465	0.9461	0.9566
		0.1242	0.8972	0.9571	0.9424	0.9023	0.8908	0.868	0.8499	0.8988	0.8827	0.9148	0.8961
		0.1243	0.8972	0.9571	0.9734	0.9315	0.9011	0.9103	0.8564	0.8868	0.8952	0.9311	0.9012
23:30:00	37.00	0.1365	0.1478	0.8506	0.9247	0.9439	0.926	0.8685	0.1378	0.1353	0.1437	0.1389	0.1426
		0.1376	0.155	0.802	0.9102	0.8951	0.926	0.9186	0.1369	0.929	0.9294	0.9294	0.9294
		0.1542	0.1612	0.9522	0.9495	0.9473	0.9703	0.9362	0.1362	0.9788	0.9936	0.9936	0.9936
		0.1346	0.1267	0.9192	0.9286	0.9589	0.9648	0.9158	0.1458	0.9498	0.9498	0.988	0.9305
		0.125	0.9152	0.9481	0.9473	0.8967	0.9398	0.9063	0.8704	0.9477	0.9498	0.988	0.9305
		0.1247	0.8893	0.9677	0.9387	0.921	0.8993	0.8785	0.8571	0.9151	0.9465	0.9454	0.9564
		0.1242	0.9006	0.9571	0.9425	0.9023	0.8894	0.8666	0.8485	0.8982	0.8813	0.9144	0.8954
		0.1242	0.9006	0.9571	0.9717	0.9305	0.901	0.9104	0.8538	0.8862	0.8936	0.9301	0.8994
23:40:00	37.00	0.1364	0.1514	0.8513	0.9274	0.9455	0.9261	0.8683	0.1379	0.1354	0.1439	0.1387	0.1429
		0.1376	0.1604	0.8017	0.9131	0.893	0.9261	0.9165	0.1368	0.9287	0.9292	0.9292	0.9292
		0.1535	0.1665	0.9522	0.9511	0.9474	0.968	0.9333	0.1362	0.9777	0.9909	0.9909	0.9909
		0.1345	0.1265	0.9161	0.9229	0.9607	0.9653	0.9156	0.1456	0.97	0.9926	0.9926	0.9926
		0.125	0.9146	0.9483	0.9472	0.8955	0.938	0.9042	0.8694	0.9484	0.9487	0.9878	0.9301
		0.1246	0.887	0.9686	0.9394	0.9193	0.8979	0.877	0.855	0.9138	0.9453	0.9465	0.9562
		0.1243	0.8993	0.9564	0.9419	0.9013	0.8879	0.8643	0.8476	0.8955	0.8784	0.914	0.8948
		0.1241	0.8993	0.9564	0.9713	0.9279	0.8984	0.9075	0.8526	0.8837	0.8918	0.9284	0.8962
23:50:00	37.00	0.1363	0.1547	0.8552	0.9222	0.9464	0.9245	0.8684	0.1378	0.1354	0.1433	0.1391	0.1426
		0.1369	0.166	0.7952	0.91	0.8882	0.9245	0.9147	0.1369	0.9287	0.9293	0.9267	0.962
		0.1532	0.1749	0.9467	0.9527	0.9452	0.9669	0.9323	0.1361	0.9772	0.9921	0.9921	0.9921
		0.1346	0.1265	0.9224	0.919	0.9609	0.9647	0.9145	0.1452	0.9699	0.9946	0.9946	0.9939
		0.125	0.9158	0.9477	0.9471	0.8963	0.9369	0.9027	0.8666	0.9473	0.9471	0.9865	0.9283
		0.1247	0.8857	0.9719	0.9397	0.918	0.8971	0.8754	0.8527	0.9128	0.9436	0.9462	0.9544
		0.1241	0.8975	0.9568	0.9399	0.902	0.8866	0.8632	0.8455	0.8945	0.8765	0.9147	0.8945
		0.1241	0.8975	0.9568	0.9709	0.9264	0.8972	0.9052	0.8511	0.8823	0.8901	0.9274	0.894
24:00:00	37.00	0.1363	0.1611	0.8584	0.9255	0.9446	0.9237	0.8673	0.1379	0.1353	0.1433	0.1386	0.1435
		0.1371	0.1734	0.7948	0.9126	0.89	0.9237	0.9146	0.137	0.9287	0.9293	0.9267	0.9709
		0.1533	0.1805	0.9476	0.9498	0.9447	0.9659	0.9327	0.1362	0.975	0.9887	0.9887	0.9887
		0.1341	0.1264	0.9205	0.9174	0.9587	0.9634	0.914	0.1454	0.9706	0.9958	0.9958	0.9958
		0.1251	0.9165	0.947	0.9454	0.8963	0.937	0.9027	0.8659	0.9458	0.9458	0.9846	0.9271
		0.1247	0.8845	0.9667	0.9384	0.918	0.896	0.8756	0.8521	0.9118	0.943	0.9452	0.9553
		0.1244	0.8979	0.9546	0.9394	0.9007	0.8863	0.8625	0.8445	0.8944	0.8764	0.914	0.8932
		0.1239	0.8979	0.9546	0.9694	0.9255	0.8978	0.9063	0.8475	0.8813	0.8886	0.9266	0.8926
~End

## Sheet: S.aureus-Lippia citriodora
PlateFormat 96wells		Wells
		A1	A2	A3	A4	A5	A6	A7	A8	A9	A10	A11	A12
		B1	B2	B3	B4	B5	B6	B7	B8	B9	B10	B11	B12
		C1	C2	C3	C4	C5	C6	C7	C8	C9	C10	C11	C12
		D1	D2	D3	D4	D5	D6	D7	D8	D9	D10	D11	D12
		E1	E2	E3	E4	E5	E6	E7	E8	E9	E10	E11	E12
		F1	F2	F3	F4	F5	F6	F7	F8	F9	F10	F11	F12
		G1	G2	G3	G4	G5	G6	G7	G8	G9	G10	G11	G12
		H1	H2	H3	H4	H5	H6	H7	H8	H9	H10	H11	H12
PlateFormat 96wells		Concentration of L. citriodora EO in each well (%v/v) (4 replicates)
		1	0.5	0.25	0.125	0.0625	0.03125	0.015625	0	0.6	0.6	0.6	0.6
		1	0.5	0.25	0.125	0.0625	0.03125	0.015625	0	0.3	0.3	0.3	0.3
		1	0.5	0.25	0.125	0.0625	0.03125	0.015625	0	0.15	0.15	0.15	0.15
		1	0.5	0.26	0.125	0.0625	0.03125	0.015625	0	0.075	0.075	0.075	0.075
		0.8	0.4	0.2	0.1	0.05	0.025	0.0125	0	0.0375	0.0375	0.0375	0.0375
		0.8	0.4	0.2	0.1	0.05	0.025	0.0125	0	0.01875	0.01875	0.01875	0.01875
		0.8	0.4	0.2	0.1	0.05	0.025	0.0125	0	0.009375	0.009375	0.009375	0.009375
		0.8	0.4	0.2	0.1	0.05	0.025	0.0125	0	0.0046875	0.0046875	0.0046875	0.0046875			concentration(%v/v)
PlateFormat 96wells																	1	0.8	0.6	0.5	0.4	0.3	0.25	0.2	0.15	0.125	0.1	0.075	0.0625	0.05	0.0375	0.03125	0.025	0.01875	0.015625	0.0125	0.009375	0.0046875	Control no inoculum no essential oil	Control with inoculum no essential oil
Time(hh:mm:ss)	Temperature(΅C)	absorbance (at 610nm)														Time(hh:mm:ss)	average absorbance /10 min
																00:00	0.1854	0.174	0.24865	0.271725	0.233075	0.22545	0.235575	0.182675	0.186275	0.18555	0.158425	0.15985	0.153275	0.1483	0.14755	0.151825	0.145	0.1439	0.14475	0.1428	0.146025	0.141675	0.1421	0.1419
0:00	37.00	0.1887	0.26	0.2314	0.1863	0.1574	0.1504	0.1453	0.1439	0.2609	0.2546	0.2501	0.229			10:00	0.18235	0.1728	0.25205	0.232075	0.216975	0.21195	0.223375	0.175125	0.1763	0.178025	0.156425	0.153575	0.1493	0.146025	0.145125	0.1496	0.143525	0.142	0.14295	0.141175	0.1446	0.140025	0.1409	0.140475
		0.1846	0.2552	0.238	0.1891	0.15	0.1465	0.1461	0.1401	0.2281	0.2222	0.2298	0.2217			20:00	0.18075	0.1718	0.260775	0.2769	0.201325	0.20145	0.205175	0.16945	0.170425	0.17085	0.1527	0.150525	0.14735	0.145675	0.143425	0.1482	0.142325	0.141025	0.142225	0.1405	0.1438	0.139325	0.14055	0.139975
		0.1866	0.2728	0.2482	0.1826	0.1523	0.1516	0.1441	0.1442	0.1883	0.1906	0.1811	0.1851			30:00	0.17995	0.1703	0.267575	0.260175	0.19265	0.1937	0.19345	0.164325	0.165525	0.163925	0.14965	0.148525	0.14475	0.144325	0.14205	0.1457	0.1405	0.1404	0.141125	0.139975	0.1432	0.138925	0.14135	0.139475
		0.1817	0.2989	0.2247	0.1842	0.1534	0.1588	0.1435	0.1402	0.1632	0.1582	0.1623	0.1557			40:00	0.18015	0.1703	0.249125	0.2456	0.185325	0.186825	0.1881	0.159775	0.162875	0.161075	0.149125	0.14705	0.1426	0.1423	0.14155	0.145075	0.1396	0.13965	0.1405	0.1398	0.14245	0.1383	0.1412	0.13925
		0.1755	0.2302	0.1838	0.1563	0.1452	0.143	0.1398	0.1424	0.1473	0.1493	0.1449	0.1487			50:00	0.17905	0.169175	0.239025	0.2352	0.1814	0.180475	0.18345	0.15735	0.160175	0.15765	0.14775	0.14625	0.143675	0.142875	0.141375	0.145475	0.140475	0.139525	0.140325	0.13945	0.1425	0.138325	0.14025	0.138975
		0.1773	0.2277	0.1766	0.1591	0.1432	0.1423	0.1478	0.1422	0.1427	0.1421	0.1464	0.1444			1:00:00	0.178425	0.169475	0.226425	0.22945	0.177725	0.177725	0.17995	0.155925	0.159525	0.155825	0.146375	0.14545	0.142425	0.142375	0.140925	0.145175	0.140125	0.139475	0.14005	0.13915	0.14235	0.138175	0.13925	0.1389
		0.1763	0.2345	0.1833	0.1594	0.1491	0.1521	0.1407	0.1407	0.1442	0.1458	0.1433	0.1508			1:10:00	0.176375	0.1673	0.22235	0.21835	0.17805	0.1739	0.17755	0.15455	0.1581	0.1538	0.145925	0.14495	0.1414	0.14165	0.1405	0.14425	0.14015	0.139175	0.139825	0.13915	0.1422	0.138025	0.137775	0.137525
		0.1669	0.2399	0.187	0.1589	0.1557	0.1426	0.1429	0.1423	0.14	0.1462	0.1433	0.1372			1:20:00	0.175725	0.166875	0.214	0.2112	0.171425	0.171475	0.173675	0.153175	0.154475	0.15235	0.14405	0.1437	0.1411	0.14145	0.1399	0.144	0.140025	0.138925	0.139575	0.139025	0.141975	0.137925	0.138875	0.1387
																1:30:00	0.1756	0.167175	0.2103	0.207875	0.1687	0.1677	0.1722	0.15135	0.15515	0.1519	0.1447	0.143325	0.1401	0.141225	0.139725	0.14355	0.139575	0.138725	0.139325	0.138825	0.14165	0.13785	0.138625	0.1386
10:00	37.00	0.1849	0.2291	0.2224	0.1757	0.1522	0.1469	0.1443	0.1428	0.2129	0.2958	0.2028	0.2967			1:40:00	0.177125	0.167725	0.2052	0.20555	0.1655	0.1654	0.168625	0.150725	0.153675	0.149925	0.14285	0.142725	0.139725	0.140675	0.139525	0.143525	0.1396	0.1385	0.137925	0.137575	0.141675	0.137575	0.1374	0.137325
		0.1818	0.2229	0.2308	0.1797	0.1457	0.1453	0.1453	0.1389	0.2163	0.2075	0.2123	0.2117			1:50:00	0.176825	0.167225	0.20145	0.202275	0.165475	0.164325	0.166225	0.149325	0.15375	0.14965	0.14335	0.142425	0.13925	0.140425	0.139225	0.143275	0.139375	0.138325	0.139025	0.138525	0.14155	0.1376	0.13835	0.138425
		0.185	0.2127	0.2222	0.1778	0.1484	0.1485	0.1414	0.1427	0.178	0.1857	0.1674	0.1741			2:00:00	0.176375	0.1676	0.196125	0.1958	0.1628	0.16115	0.1641	0.1482	0.15215	0.148725	0.1435	0.141875	0.138675	0.13985	0.1389	0.14325	0.139275	0.138325	0.13885	0.138325	0.141375	0.137375	0.13835	0.138375
		0.1777	0.2636	0.2181	0.1789	0.1509	0.1577	0.1408	0.1392	0.1571	0.1535	0.1555	0.1482			2:10:00	0.174525	0.165125	0.1926	0.1956	0.15925	0.16015	0.16275	0.14805	0.150925	0.14715	0.14145	0.141325	0.138375	0.139625	0.138525	0.1433	0.1392	0.1381	0.13885	0.13825	0.1412	0.1373	0.13715	0.137075
		0.174	0.2143	0.1823	0.1545	0.1435	0.1413	0.1381	0.141	0.1435	0.1469	0.1431	0.147			2:20:00	0.175975	0.1666	0.18845	0.19375	0.1594	0.15855	0.1598	0.146775	0.1507	0.14615	0.141	0.140625	0.137975	0.139525	0.138075	0.142025	0.137725	0.137775	0.13845	0.138125	0.140775	0.13685	0.1381	0.13805
		0.1769	0.2159	0.1715	0.1557	0.1408	0.1417	0.146	0.1407	0.141	0.1407	0.1442	0.1421			2:30:00	0.174175	0.165925	0.1857	0.18965	0.1562	0.157125	0.1589	0.146175	0.150125	0.147025	0.14175	0.14075	0.1367	0.138025	0.1385	0.142825	0.138975	0.13785	0.138475	0.138075	0.141225	0.1372	0.1385	0.1381
		0.1746	0.223	0.176	0.1564	0.1479	0.1503	0.1391	0.1394	0.1432	0.1442	0.1418	0.1492			2:40:00	0.1734	0.165425	0.183375	0.1854	0.1546	0.155525	0.15835	0.14575	0.148725	0.146175	0.141375	0.140525	0.13645	0.13795	0.1381	0.142925	0.138775	0.1377	0.13825	0.137825	0.140925	0.137075	0.137875	0.137875
		0.1657	0.2147	0.1707	0.1591	0.1519	0.1408	0.1415	0.1408	0.1389	0.1441	0.1416	0.1355			2:50:00	0.174225	0.16385	0.181525	0.182525	0.154175	0.155	0.155275	0.1452	0.148825	0.1455	0.141125	0.14015	0.13735	0.138975	0.13805	0.14135	0.137475	0.13765	0.138225	0.13785	0.14075	0.136975	0.13795	0.1379
																3:00:00	0.1734	0.163775	0.177475	0.18035	0.15235	0.15295	0.15605	0.14475	0.1479	0.14385	0.1396	0.13995	0.13715	0.1388	0.137925	0.14105	0.13745	0.137575	0.138275	0.137625	0.140575	0.136825	0.13775	0.1378
20:00	37.00	0.1839	0.2763	0.2015	0.1656	0.1497	0.1461	0.144	0.1423	0.2023	0.2777	0.2832	0.2799			3:10:00	0.173425	0.164	0.1741	0.17685	0.1513	0.152775	0.1529	0.143875	0.147675	0.144425	0.14075	0.13955	0.136825	0.138525	0.13765	0.14185	0.13855	0.137475	0.136925	0.1364	0.140475	0.136825	0.137675	0.1377
		0.1803	0.2998	0.2049	0.1777	0.1435	0.1431	0.1436	0.1394	0.2086	0.1954	0.2025	0.1993			3:20:00	0.17205	0.163775	0.173725	0.17545	0.150825	0.150775	0.1535	0.1435	0.147025	0.144025	0.140375	0.139025	0.136475	0.1385	0.13735	0.14145	0.1383	0.137025	0.13675	0.1363	0.14005	0.136425	0.1377	0.137625
		0.1832	0.2884	0.2075	0.1694	0.1475	0.149	0.1408	0.142	0.1702	0.1797	0.1646	0.1672			3:30:00	0.1718	0.163725	0.171375	0.1741	0.149475	0.150525	0.1519	0.143075	0.1468	0.143725	0.14	0.1393	0.136325	0.13845	0.137325	0.14005	0.137075	0.1371	0.13775	0.1374	0.14035	0.136725	0.13755	0.137575
		0.1756	0.2431	0.2068	0.1707	0.1487	0.1546	0.1405	0.1385	0.1534	0.1493	0.1533	0.1461			3:40:00	0.172175	0.163475	0.1681	0.171825	0.148375	0.149425	0.150925	0.14265	0.146175	0.142	0.1386	0.1385	0.134975	0.13725	0.13685	0.14115	0.13825	0.1367	0.13765	0.13725	0.1399	0.136275	0.137475	0.137575
		0.1741	0.2031	0.1707	0.1517	0.1426	0.1403	0.1376	0.1406	0.1426	0.1449	0.1412	0.145			3:50:00	0.1718	0.163325	0.168225	0.1716	0.1478	0.148375	0.15125	0.1418	0.145575	0.1428	0.1396	0.1384	0.135925	0.137975	0.13675	0.140825	0.13795	0.136525	0.1375	0.137375	0.1399	0.1363	0.137475	0.1375
		0.1769	0.2018	0.1656	0.1523	0.1421	0.14	0.1451	0.1402	0.1401	0.1397	0.143	0.1413			4:00:00	0.171825	0.162925	0.164975	0.1676	0.1485	0.147875	0.14965	0.1418	0.145575	0.14255	0.13955	0.13825	0.13575	0.138	0.136575	0.139775	0.137	0.1364	0.136475	0.136225	0.139775	0.1362	0.137325	0.137475
		0.1724	0.1987	0.1732	0.1522	0.1468	0.1488	0.1383	0.1389	0.1423	0.143	0.1415	0.1484			4:10:00	0.17205	0.163725	0.1643	0.1669	0.146725	0.1474	0.149225	0.141425	0.1451	0.140925	0.138275	0.138175	0.13435	0.13675	0.136975	0.1395	0.1368	0.136725	0.136225	0.13615	0.139925	0.136475	0.137275	0.137475
		0.1638	0.2017	0.1683	0.1546	0.1512	0.1402	0.141	0.1402	0.1384	0.1433	0.1407	0.1349			4:20:00	0.171475	0.163075	0.162325	0.164875	0.145875	0.146	0.14725	0.139875	0.14465	0.1417	0.139025	0.1378	0.134325	0.13695	0.13655	0.140525	0.13785	0.1363	0.136225	0.135975	0.13955	0.136125	0.13715	0.1374
																4:30:00	0.171425	0.163425	0.1612	0.164	0.145	0.1458	0.146625	0.139475	0.144625	0.1404	0.13755	0.137825	0.134075	0.1364	0.1366	0.139325	0.136475	0.1365	0.1361	0.13595	0.13975	0.136375	0.136	0.1363
30:00	37.00	0.1819	0.2543	0.1924	0.1598	0.1478	0.1444	0.1426	0.1415	0.2749	0.2654	0.2718	0.2582			4:40:00	0.1719	0.16285	0.15925	0.162	0.146475	0.14505	0.1456	0.139425	0.144275	0.141325	0.13875	0.137875	0.1338	0.1365	0.136625	0.14045	0.13755	0.136475	0.1372	0.13735	0.139775	0.13645	0.137025	0.1375
		0.1797	0.2818	0.1944	0.1719	0.1406	0.1408	0.1429	0.1442	0.2008	0.1902	0.1934	0.1904			4:50:00	0.1718	0.16385	0.1584	0.16185	0.143875	0.144875	0.14665	0.14015	0.144175	0.1409	0.138575	0.13775	0.134875	0.13755	0.1365	0.140475	0.137425	0.1364	0.135875	0.13575	0.139725	0.13635	0.137	0.13755
		0.1838	0.2663	0.1901	0.1585	0.1453	0.1459	0.1395	0.1414	0.1658	0.1725	0.1607	0.1631			5:00:00	0.1854	0.174	0.157525	0.159275	0.146175	0.143575	0.146225	0.1396	0.143075	0.1394	0.137275	0.1368	0.1337	0.1363	0.1357	0.140375	0.137525	0.13575	0.13695	0.137	0.1393	0.135925	0.1369	0.1377
		0.1744	0.2383	0.1969	0.1655	0.1453	0.1517	0.1395	0.1383	0.1506	0.1468	0.1508	0.1459			5:10:00	0.18235	0.1728	0.15595	0.1595	0.1432	0.144025	0.145725	0.13965	0.1438	0.13935	0.137225	0.1373	0.133375	0.136225	0.136275	0.140275	0.1375	0.136325	0.136775	0.1369	0.1398	0.136425	0.136875	0.137925
		0.1716	0.1946	0.1634	0.1474	0.1413	0.1384	0.1375	0.14	0.141	0.1447	0.1398	0.1427			5:20:00	0.18075	0.1718	0.155175	0.159675	0.14265	0.143325	0.145675	0.1394	0.143225	0.1401	0.138225	0.1371	0.1334	0.1363	0.136225	0.1401	0.137375	0.13615	0.13695	0.1368	0.1398	0.136575	0.136825	0.138125
		0.1753	0.1954	0.1646	0.1508	0.1404	0.1387	0.1442	0.1396	0.1395	0.1392	0.1424	0.1405			5:30:00	0.17995	0.1703	0.153625	0.156975	0.142625	0.142925	0.144275	0.13915	0.143075	0.1389	0.13685	0.1371	0.134325	0.13725	0.13615	0.1403	0.137325	0.136225	0.13705	0.136725	0.13985	0.1367	0.136775	0.138575
		0.1725	0.1941	0.1663	0.1501	0.1458	0.1462	0.1377	0.1386	0.1415	0.1425	0.1408	0.148			5:40:00	0.18015	0.1703	0.15335	0.156025	0.1421	0.14245	0.14265	0.137725	0.142725	0.13985	0.13785	0.136675	0.133075	0.136225	0.135725	0.140225	0.137325	0.1359	0.135725	0.1356	0.13965	0.13675	0.136675	0.139025
		0.1618	0.1865	0.163	0.1503	0.1498	0.1387	0.1405	0.1397	0.1382	0.1428	0.1402	0.1345			5:50:00	0.17905	0.169175	0.15245	0.1539	0.140275	0.142	0.143425	0.138725	0.14215	0.13845	0.136475	0.1364	0.132975	0.136	0.135625	0.140275	0.1372	0.13605	0.1358	0.13565	0.139875	0.1369	0.136675	0.1399
																6:00:00	0.178425	0.169475	0.151825	0.1532	0.14	0.141875	0.14365	0.138575	0.142075	0.139375	0.137575	0.13645	0.134125	0.13735	0.135675	0.1404	0.13725	0.135975	0.1371	0.13675	0.1401	0.137475	0.136575	0.1406
40:00	37.00	0.1828	0.2439	0.1869	0.1573	0.1457	0.1435	0.142	0.1415	0.2502	0.2488	0.2512	0.2463			6:10:00	0.176375	0.1673	0.15105	0.1516	0.13925	0.141275	0.14225	0.137025	0.14165	0.1391	0.13735	0.136175	0.132775	0.13605	0.1356	0.139525	0.136075	0.136075	0.13715	0.136675	0.140925	0.137975	0.136525	0.1421
		0.1794	0.2594	0.195	0.1692	0.1396	0.1407	0.1421	0.1441	0.19	0.1871	0.186	0.1842			6:20:00	0.175725	0.166875	0.149475	0.1528	0.141375	0.14165	0.141575	0.1371	0.141775	0.138925	0.137225	0.1364	0.132575	0.13605	0.13565	0.140725	0.1372	0.136475	0.137375	0.13675	0.141225	0.1394	0.1365	0.143275
		0.1825	0.2556	0.1794	0.1568	0.1424	0.145	0.139	0.1413	0.1639	0.1685	0.1576	0.1615			6:30:00	0.1756	0.167175	0.149025	0.1504	0.1383	0.140225	0.141375	0.1367	0.14095	0.13755	0.135925	0.1356	0.132575	0.136375	0.135025	0.140075	0.1361	0.13615	0.136575	0.135725	0.141425	0.13965	0.13645	0.145725
		0.1759	0.2235	0.1911	0.161	0.1427	0.1511	0.1389	0.1379	0.1489	0.1455	0.1484	0.1454			6:40:00	0.177125	0.167725	0.149125	0.150925	0.139325	0.14085	0.142275	0.13775	0.141475	0.1388	0.1371	0.136275	0.133725	0.13775	0.135725	0.14065	0.13615	0.137025	0.138225	0.137025	0.142775	0.14185	0.1364	0.14755
		0.1728	0.1849	0.1578	0.1483	0.139	0.1374	0.1372	0.1399	0.1413	0.1441	0.1383	0.1425			6:50:00	0.176825	0.167225	0.14775	0.149175	0.138025	0.14035	0.141825	0.13765	0.141225	0.1387	0.1369	0.13605	0.132375	0.136725	0.1358	0.1422	0.13735	0.1374	0.138475	0.13715	0.143975	0.14335	0.136425	0.151175
		0.1753	0.1903	0.16	0.1496	0.1388	0.1375	0.144	0.1393	0.1388	0.139	0.1408	0.14			7:00:00	0.176375	0.1676	0.1467	0.14965	0.13885	0.139675	0.141775	0.1375	0.140325	0.137	0.135725	0.13535	0.13345	0.1382	0.135025	0.1431	0.137575	0.137175	0.138325	0.13635	0.144725	0.145275	0.136225	0.15365
		0.172	0.183	0.1618	0.149	0.144	0.1452	0.1375	0.1384	0.141	0.1423	0.1391	0.1474			7:10:00	0.174525	0.165125	0.146475	0.149225	0.138325	0.14	0.1401	0.136075	0.14075	0.137125	0.135575	0.135725	0.133275	0.138825	0.1357	0.1441	0.137725	0.13865	0.14005	0.137825	0.14715	0.147625	0.136175	0.1579
		0.1611	0.1831	0.1595	0.1496	0.1474	0.1383	0.1405	0.1394	0.138	0.1425	0.1386	0.1341			7:20:00	0.175975	0.1666	0.146	0.14825	0.13735	0.139625	0.140175	0.136	0.14085	0.1369	0.135425	0.135825	0.132175	0.1382	0.13565	0.144425	0.1368	0.14	0.14155	0.138425	0.149	0.1502	0.136225	0.161025
																7:30:00	0.174175	0.165925	0.1453	0.1471	0.136475	0.139325	0.140175	0.13575	0.140625	0.136775	0.1353	0.13555	0.1321	0.139175	0.135725	0.14605	0.1373	0.1411	0.141275	0.1379	0.15185	0.15285	0.13625	0.166425
50:00	37.00	0.1814	0.239	0.1849	0.1539	0.1463	0.1438	0.1417	0.1411	0.2379	0.2417	0.2447	0.2318			7:40:00	0.1734	0.165425	0.144875	0.146725	0.13745	0.138775	0.1396	0.1357	0.1403	0.136525	0.1353	0.13515	0.131925	0.1401	0.135575	0.147975	0.13775	0.14215	0.144525	0.140125	0.1541	0.15655	0.136075	0.16985
		0.1787	0.2485	0.181	0.1668	0.1415	0.1405	0.1421	0.141	0.184	0.1794	0.1787	0.1798			7:50:00	0.174225	0.16385	0.1445	0.14695	0.137325	0.13875	0.13895	0.1355	0.14005	0.136375	0.1351	0.13505	0.13195	0.14125	0.1359	0.151625	0.13945	0.14395	0.144975	0.14	0.1581	0.16005	0.1361	0.1766
		0.1834	0.2469	0.1807	0.1534	0.1435	0.1452	0.1389	0.141	0.1595	0.1653	0.156	0.1599			8:00:00	0.1734	0.163775	0.144125	0.146	0.136225	0.13885	0.13925	0.13545	0.140075	0.1373	0.136175	0.135325	0.132925	0.14385	0.136275	0.1537	0.14045	0.1448	0.149125	0.142675	0.161575	0.165025	0.135975	0.180225
		0.1727	0.2064	0.1872	0.1565	0.1434	0.1524	0.1386	0.1379	0.1474	0.1445	0.1486	0.1445			8:10:00	0.173425	0.164	0.14375	0.144975	0.1358	0.1388	0.13875	0.135275	0.14005	0.1363	0.13485	0.135375	0.131625	0.144475	0.1366	0.1551	0.1402	0.147475	0.151075	0.1441	0.166575	0.168575	0.136	0.18825
		0.1709	0.1832	0.1575	0.1458	0.1395	0.1385	0.1372	0.1396	0.1407	0.143	0.1397	0.1421			8:20:00	0.17205	0.163775	0.1431	0.145825	0.1382	0.13815	0.13855	0.135175	0.1396	0.13715	0.13615	0.135225	0.1317	0.14615	0.136525	0.157925	0.1415	0.14885	0.155225	0.1462	0.170025	0.17325	0.135825	0.1925
		0.1734	0.1842	0.1576	0.1498	0.1391	0.1384	0.1436	0.1389	0.1381	0.1388	0.1416	0.1396			8:30:00	0.1718	0.163725	0.142725	0.14425	0.13545	0.138025	0.13825	0.134975	0.139375	0.135925	0.1347	0.134875	0.13145	0.148525	0.137325	0.160875	0.1429	0.1522	0.157725	0.1486	0.176	0.177025	0.13585	0.20185
		0.172	0.1802	0.1586	0.1485	0.1451	0.1458	0.1372	0.1383	0.1407	0.1419	0.1402	0.1472			8:40:00	0.172175	0.163475	0.142825	0.1442	0.13515	0.138175	0.138275	0.13495	0.13975	0.1359	0.13465	0.1352	0.131675	0.15085	0.137925	0.165	0.145675	0.154275	0.16305	0.1513	0.1807	0.182675	0.1358	0.206875
		0.1604	0.178	0.1557	0.1469	0.1478	0.1392	0.1398	0.1391	0.1376	0.1421	0.1396	0.134			8:50:00	0.1718	0.163325	0.14215	0.144075	0.134975	0.137925	0.13915	0.13595	0.1394	0.135775	0.13465	0.135025	0.13145	0.153725	0.1393	0.1672	0.146225	0.158225	0.166125	0.1543	0.187925	0.1872	0.135775	0.216675
																9:00:00	0.171825	0.162925	0.142025	0.143375	0.1348	0.137875	0.137725	0.1349	0.1394	0.1357	0.134475	0.135125	0.131525	0.157275	0.140025	0.17095	0.148425	0.1602	0.17215	0.1581	0.192925	0.193525	0.135675	0.2223
1:00:00	37.00	0.1792	0.2312	0.1815	0.1532	0.1449	0.1432	0.1421	0.141	0.2285	0.2213	0.2315	0.2244			9:10:00	0.17205	0.163725	0.14175	0.14295	0.134375	0.137475	0.137625	0.13445	0.139275	0.1356	0.134375	0.135075	0.1315	0.1604	0.14175	0.175625	0.151925	0.165325	0.176375	0.161925	0.200925	0.19885	0.13565	0.2336
		0.1765	0.2428	0.1808	0.1645	0.1398	0.1403	0.1413	0.1376	0.1816	0.177	0.1763	0.176			9:20:00	0.171475	0.163075	0.141475	0.142575	0.134325	0.137325	0.1377	0.1346	0.139175	0.136675	0.13555	0.1351	0.132675	0.1652	0.143075	0.179425	0.154625	0.16795	0.183575	0.1659	0.206425	0.205325	0.13565	0.240025
		0.1843	0.2411	0.1796	0.1517	0.1423	0.1456	0.1384	0.1408	0.1608	0.1648	0.1547	0.1578			9:30:00	0.171425	0.163425	0.141	0.141975	0.134075	0.137275	0.13765	0.134225	0.139075	0.1354	0.1341	0.134925	0.1317	0.1686	0.145675	0.18355	0.157425	0.1734	0.18825	0.170475	0.215725	0.211425	0.1356	0.2518
		0.1737	0.2027	0.1779	0.1539	0.1427	0.1516	0.1384	0.1376	0.1475	0.1439	0.1482	0.1422			9:40:00	0.1719	0.16285	0.141025	0.142925	0.135125	0.137275	0.1374	0.134175	0.139	0.135125	0.1341	0.13505	0.1319	0.17335	0.148275	0.18645	0.159425	0.17785	0.19215	0.176125	0.22485	0.219	0.135525	0.260425
		0.1704	0.1784	0.1553	0.144	0.1399	0.1384	0.1365	0.1395	0.1404	0.1427	0.1389	0.1417			9:50:00	0.1718	0.16385	0.140675	0.141575	0.134	0.137075	0.137075	0.1341	0.13885	0.1351	0.13405	0.1349	0.132075	0.1781	0.150925	0.1921	0.164175	0.182525	0.2019	0.180675	0.231225	0.2258	0.135525	0.27105
		0.1734	0.1814	0.1557	0.1468	0.1385	0.1381	0.1434	0.1389	0.138	0.1389	0.1416	0.1394			10:00:00	0.16665	0.140075	0.140325	0.1411	0.13375	0.13715	0.136875	0.13405	0.138725	0.134975	0.134	0.135075	0.132275	0.183125	0.15405	0.196375	0.168275	0.185875	0.21095	0.1862	0.238425	0.2338	0.135475	0.278125
		0.1729	0.1768	0.1569	0.1481	0.1439	0.1454	0.1372	0.1381	0.1407	0.1418	0.14	0.1469			10:10:00	0.163625	0.139325	0.14085	0.140925	0.133775	0.136725	0.13715	0.133825	0.138575	0.135	0.13385	0.135	0.1326	0.188875	0.15805	0.201175	0.172575	0.1933	0.216975	0.1919	0.24925	0.241775	0.135475	0.2915
		0.1612	0.1743	0.1558	0.1466	0.1472	0.1386	0.1395	0.1391	0.1376	0.142	0.1393	0.1338			10:20:00	0.1628	0.137825	0.14	0.14065	0.133225	0.13665	0.13655	0.13385	0.138625	0.134725	0.13385	0.13515	0.1333	0.194425	0.162025	0.205875	0.177425	0.197625	0.226775	0.198025	0.2567	0.250275	0.135325	0.299
																10:30:00	0.16075	0.137675	0.1396	0.14025	0.133325	0.136425	0.1366	0.1337	0.138525	0.1347	0.1338	0.134925	0.13425	0.200575	0.16725	0.211125	0.1821	0.2058	0.233275	0.20515	0.268625	0.2594	0.134225	0.3115
1:10:00	37.00	0.1776	0.2247	0.1753	0.1511	0.1436	0.1425	0.1414	0.1396	0.2243	0.2224	0.2268	0.2159			10:40:00	0.161575	0.138225	0.1395	0.140075	0.13315	0.1363	0.1365	0.13365	0.138225	0.134575	0.133725	0.13485	0.13545	0.20695	0.1722	0.21585	0.1878	0.210525	0.24395	0.212075	0.27725	0.2684	0.13525	0.320575
		0.1764	0.2195	0.1735	0.1591	0.1373	0.1395	0.1414	0.1358	0.1783	0.1736	0.1722	0.1715			10:50:00	0.1614	0.13835	0.138925	0.139725	0.133125	0.1358	0.135975	0.133425	0.1379	0.1344	0.133675	0.135825	0.138	0.2144	0.1777	0.22165	0.193325	0.219575	0.251025	0.2194	0.28935	0.27805	0.135275	0.33545
		0.1795	0.2268	0.1849	0.1531	0.1421	0.1436	0.1383	0.1393	0.16	0.1615	0.1538	0.1571			11:00:00	0.1592	0.1371	0.1391	0.14045	0.1329	0.135975	0.1356	0.133425	0.138025	0.13425	0.133725	0.135975	0.139525	0.220225	0.183825	0.22645	0.199925	0.2248	0.2622	0.2269	0.2985	0.288175	0.135175	0.343575
		0.172	0.2024	0.1765	0.1519	0.1426	0.1514	0.1382	0.1364	0.147	0.1438	0.1475	0.1415			11:10:00	0.15875	0.13685	0.138775	0.139325	0.1326	0.13595	0.135975	0.1333	0.137975	0.13425	0.133575	0.135225	0.14205	0.227275	0.190475	0.2327	0.206175	0.235025	0.269125	0.23505	0.312025	0.29825	0.135225	0.358875
		0.1708	0.1742	0.1554	0.1439	0.1384	0.1382	0.1367	0.1381	0.1398	0.142	0.1389	0.1413			11:20:00	0.159725	0.1378	0.13875	0.139325	0.1325	0.13575	0.13585	0.13315	0.137925	0.135375	0.134675	0.13595	0.145925	0.23455	0.197225	0.238475	0.213475	0.2404	0.281525	0.243325	0.3219	0.3087	0.1351	0.367925
		0.1703	0.1866	0.1541	0.1468	0.1378	0.1381	0.1431	0.1375	0.138	0.1383	0.1415	0.1389			11:30:00	0.1579	0.13655	0.1385	0.138925	0.13255	0.135775	0.135675	0.133125	0.137725	0.1342	0.133575	0.1361	0.1493	0.24225	0.205525	0.244825	0.22045	0.2514	0.2905	0.2523	0.3363	0.320575	0.135125	0.38395
		0.1697	0.1733	0.1567	0.1465	0.1436	0.1453	0.1371	0.1368	0.1407	0.1415	0.1398	0.1468			11:40:00	0.15655	0.136075	0.138275	0.1387	0.132375	0.135525	0.1365	0.134225	0.13765	0.134	0.13365	0.1361	0.15515	0.25125	0.213025	0.250775	0.228325	0.2577	0.3042	0.261725	0.3466	0.331775	0.13505	0.393975
		0.1584	0.1781	0.152	0.1465	0.1468	0.139	0.1397	0.1377	0.1375	0.1419	0.1391	0.1336			11:50:00	0.155525	0.1358	0.1381	0.138575	0.1322	0.135725	0.1357	0.133075	0.1376	0.134	0.1337	0.13705	0.159325	0.2594	0.2223	0.258075	0.236275	0.2694	0.31315	0.270775	0.3621	0.344175	0.13505	0.41115
																12:00:00	0.155675	0.13725	0.13785	0.138925	0.131975	0.1354	0.135475	0.132775	0.13755	0.133925	0.1338	0.137725	0.163925	0.26715	0.23095	0.264575	0.244625	0.275725	0.3288	0.28	0.373475	0.355775	0.134925	0.422025
1:20:00	37.00	0.1779	0.2171	0.1717	0.1495	0.1424	0.1426	0.1412	0.1409	0.2173	0.2121	0.2163	0.2103			12:10:00	0.15465	0.1354	0.137875	0.138125	0.131875	0.1353	0.1353	0.132725	0.1373	0.133775	0.1339	0.13925	0.169775	0.276625	0.240975	0.272225	0.25325	0.2875	0.3394	0.290725	0.389375	0.36965	0.13495	0.440925
		0.1752	0.2196	0.1708	0.1605	0.137	0.1392	0.141	0.1366	0.1748	0.1729	0.1705	0.1677			12:20:00	0.153225	0.135	0.137625	0.13815	0.131775	0.135225	0.13525	0.1326	0.1372	0.133825	0.134	0.1416	0.176675	0.285325	0.25225	0.28015	0.2617	0.2981	0.349525	0.302525	0.406875	0.384075	0.134825	0.4556
		0.1788	0.2222	0.1794	0.1503	0.1429	0.1432	0.1381	0.1406	0.1545	0.1588	0.1502	0.1544			12:30:00	0.153275	0.1347	0.137675	0.137725	0.131675	0.13515	0.135175	0.132525	0.137175	0.134875	0.135425	0.144075	0.182225	0.294975	0.261275	0.287725	0.271325	0.308	0.368575	0.312825	0.420175	0.398375	0.13485	0.474125
		0.171	0.1859	0.1728	0.1491	0.1421	0.151	0.138	0.1374	0.1452	0.1423	0.1458	0.1415			12:40:00	0.1525	0.1342	0.137675	0.13775	0.13165	0.134975	0.135075	0.1325	0.137325	0.133625	0.134525	0.1462	0.190125	0.304775	0.272225	0.2958	0.28095	0.3141	0.38635	0.3243	0.434525	0.41445	0.134775	0.4869
		0.1698	0.1743	0.1538	0.1411	0.1382	0.138	0.1364	0.1394	0.1388	0.1417	0.1383	0.1408			12:50:00	0.1524	0.134675	0.1375	0.1375	0.1314	0.13495	0.135025	0.13235	0.136975	0.134625	0.135825	0.149175	0.196175	0.313925	0.2835	0.305125	0.291	0.3293	0.400175	0.33685	0.454375	0.4298	0.134825	0.510075
		0.1704	0.1708	0.1524	0.1448	0.1377	0.1378	0.1432	0.1387	0.1377	0.1382	0.1411	0.1387			13:00:00	0.15175	0.1342	0.1382	0.137525	0.131225	0.134825	0.134675	0.13235	0.137025	0.133375	0.1353	0.152825	0.204675	0.323975	0.29475	0.3132	0.30205	0.3365	0.42095	0.351125	0.46945	0.4467	0.13475	0.525425
		0.1685	0.1698	0.1546	0.1456	0.1433	0.1457	0.137	0.1378	0.1404	0.1413	0.1396	0.1466			13:10:00	0.151925	0.13575	0.1375	0.137525	0.1312	0.13485	0.13475	0.132175	0.1369	0.133475	0.13565	0.1575	0.211825	0.333725	0.306825	0.32365	0.313775	0.35285	0.436425	0.365625	0.4909	0.464575	0.134675	0.5488
		0.1588	0.1708	0.1519	0.1447	0.1466	0.1386	0.1395	0.1389	0.1374	0.1417	0.139	0.1336			13:20:00	0.150575	0.133825	0.137075	0.137025	0.13105	0.134775	0.1346	0.132175	0.136825	0.134325	0.137475	0.1614	0.221075	0.34455	0.31895	0.33265	0.3264	0.3618	0.45845	0.380225	0.50745	0.482275	0.1346	0.5651
																13:30:00	0.150675	0.133575	0.13695	0.137075	0.130925	0.1345	0.1344	0.1321	0.13695	0.13435	0.13815	0.16555	0.22835	0.354775	0.331375	0.343225	0.3398	0.37815	0.47285	0.3966	0.529125	0.501	0.134675	0.58945
1:30:00	37.00	0.1786	0.2152	0.1722	0.1489	0.142	0.1421	0.1409	0.1406	0.2121	0.2116	0.2103	0.2072			13:40:00	0.1501	0.13375	0.13655	0.13665	0.130925	0.134475	0.1344	0.132	0.136625	0.134275	0.139	0.170875	0.23875	0.3662	0.3446	0.3535	0.354625	0.386525	0.49465	0.4128	0.545825	0.518925	0.134575	0.603175
		0.1757	0.2138	0.17	0.1591	0.1365	0.1387	0.1407	0.1363	0.1677	0.1678	0.1692	0.1661			13:50:00	0.149975	0.13325	0.136625	0.136525	0.13095	0.13425	0.1343	0.13185	0.1366	0.13425	0.1397	0.176225	0.24675	0.377675	0.357975	0.3651	0.369575	0.4042	0.51055	0.429775	0.568275	0.53805	0.134575	0.627725
		0.1783	0.2169	0.174	0.1498	0.1401	0.1426	0.1383	0.1404	0.1569	0.16	0.15	0.1537			14:00:00	0.1502	0.132925	0.136475	0.13655	0.1306	0.13415	0.134175	0.13175	0.13645	0.13305	0.1399	0.1816	0.257275	0.390975	0.371325	0.37635	0.385025	0.41295	0.531925	0.446375	0.5822	0.5555	0.134475	0.640575
		0.1698	0.1856	0.1726	0.1498	0.1418	0.1508	0.1374	0.1372	0.1455	0.1418	0.1458	0.1402			14:10:00	0.148975	0.1327	0.136375	0.136225	0.130575	0.134175	0.13415	0.131625	0.136375	0.13405	0.141975	0.187275	0.26555	0.403875	0.386325	0.38955	0.401225	0.429475	0.54675	0.462825	0.602875	0.573825	0.1345	0.66325
		0.1685	0.1713	0.1527	0.1429	0.1379	0.1377	0.1362	0.1393	0.1388	0.1414	0.138	0.1407			14:20:00	0.1491	0.1328	0.136325	0.13605	0.130575	0.134025	0.133875	0.13165	0.13645	0.13295	0.14245	0.1932	0.276625	0.41935	0.40125	0.4019	0.418	0.438775	0.566725	0.479875	0.61645	0.58895	0.13435	0.673825
		0.1705	0.1666	0.1505	0.1455	0.1382	0.1375	0.1428	0.1386	0.1373	0.1381	0.141	0.1385			14:30:00	0.1485	0.13255	0.13625	0.1359	0.130225	0.13395	0.133725	0.13155	0.136225	0.1327	0.14395	0.19855	0.2854	0.434325	0.416725	0.4161	0.43465	0.45505	0.58045	0.495125	0.634925	0.6057	0.134425	0.6927
		0.1711	0.1677	0.1522	0.1452	0.1432	0.1447	0.1368	0.1378	0.1399	0.141	0.1394	0.1463			14:40:00	0.148325	0.13235	0.1361	0.1357	0.1304	0.1338	0.133725	0.131475	0.136425	0.132725	0.146375	0.2049	0.2964	0.4514	0.43265	0.430925	0.45095	0.46365	0.5986	0.509475	0.64645	0.6199	0.134375	0.702425
		0.1586	0.1692	0.15	0.1452	0.1456	0.1384	0.1395	0.1387	0.1372	0.1415	0.1391	0.1336			14:50:00	0.147625	0.132425	0.135975	0.135475	0.1301	0.133575	0.133575	0.131475	0.13625	0.1338	0.1499	0.2114	0.304925	0.46885	0.447075	0.44585	0.467225	0.4715	0.6125	0.521325	0.6546	0.633675	0.13435	0.715525
																15:00:00	0.147825	0.132175	0.135925	0.135575	0.130125	0.13365	0.133675	0.131375	0.1364	0.1338	0.152525	0.2178	0.31725	0.486775	0.464725	0.462225	0.482425	0.4873	0.6289	0.537425	0.6718	0.6476	0.13425	0.726425
1:40:00	37.00	0.1788	0.2075	0.1683	0.1473	0.1413	0.1423	0.1397	0.1393	0.203	0.2036	0.2128	0.2014			15:10:00	0.1473	0.13205	0.135825	0.13535	0.130075	0.1337	0.13345	0.13135	0.13645	0.133725	0.1556	0.225375	0.326625	0.504925	0.48	0.4785	0.497125	0.494125	0.6404	0.54705	0.6802	0.65955	0.134225	0.737625
		0.1774	0.2099	0.1669	0.1576	0.136	0.1388	0.1394	0.1352	0.1673	0.1665	0.1643	0.1635			15:20:00	0.147725	0.13185	0.13555	0.135125	0.12985	0.133375	0.13355	0.131175	0.136725	0.1336	0.15895	0.231525	0.338775	0.5223	0.497425	0.494775	0.510925	0.508225	0.653925	0.5602	0.6936	0.67165	0.134175	0.7465
		0.1793	0.2137	0.172	0.1478	0.14	0.1427	0.1366	0.1391	0.1538	0.1592	0.1478	0.1539			15:30:00	0.146725	0.1316	0.135625	0.135125	0.129925	0.133325	0.133425	0.131125	0.1374	0.1337	0.161775	0.239125	0.34865	0.539	0.513875	0.5129	0.5237	0.522925	0.662575	0.57125	0.70565	0.682875	0.134175	0.759075
		0.173	0.1911	0.1673	0.147	0.1416	0.1503	0.136	0.136	0.1442	0.1412	0.1449	0.1406			15:40:00	0.1467	0.13165	0.13575	0.135075	0.129575	0.1333	0.133325	0.131075	0.138975	0.132525	0.165825	0.247425	0.36075	0.5568	0.530575	0.5293	0.535675	0.5267	0.676325	0.581925	0.71235	0.692675	0.134075	0.763275
		0.1692	0.1652	0.1509	0.1403	0.1375	0.1376	0.1349	0.138	0.1386	0.1411	0.1378	0.1406			15:50:00	0.146075	0.131775	0.135475	0.1355	0.129575	0.13315	0.133225	0.130975	0.13915	0.13365	0.170475	0.256	0.3714	0.572925	0.546525	0.547725	0.545425	0.53805	0.6826	0.5904	0.7233	0.702225	0.1341	0.774
		0.1709	0.1654	0.1507	0.1436	0.1374	0.1377	0.1415	0.1373	0.1374	0.1377	0.1407	0.1382			16:00:00	0.145825	0.131275	0.13525	0.134725	0.12955	0.13315	0.1343	0.1321	0.14005	0.13365	0.1755	0.2645	0.385125	0.59035	0.561525	0.56475	0.55605	0.5423	0.6932	0.597525	0.7275	0.70985	0.134125	0.77645
		0.1707	0.1639	0.1517	0.1445	0.1427	0.1448	0.1356	0.1366	0.1402	0.1409	0.1394	0.1462			16:10:00	0.145875	0.130975	0.1351	0.1345	0.129375	0.133	0.13295	0.1309	0.1421	0.13385	0.17935	0.273175	0.396925	0.6056	0.57655	0.5823	0.5655	0.552925	0.697725	0.60615	0.736325	0.717625	0.134	0.787075
		0.1601	0.1675	0.1496	0.143	0.1451	0.1383	0.1383	0.1374	0.1371	0.1413	0.1387	0.1332			16:20:00	0.145225	0.130875	0.135	0.134575	0.1292	0.132875	0.132925	0.130775	0.14335	0.132875	0.184775	0.2827	0.4122	0.62245	0.5905	0.59885	0.5746	0.5556	0.7075	0.6134	0.7391	0.72415	0.133975	0.78765
																16:30:00	0.146	0.1309	0.135025	0.13425	0.129325	0.1329	0.13285	0.1308	0.145425	0.134225	0.18965	0.293825	0.4254	0.637625	0.60325	0.615475	0.582525	0.564875	0.71	0.6182	0.746925	0.730925	0.13405	0.79655
1:50:00	37.00	0.1779	0.2036	0.1648	0.1464	0.1411	0.1417	0.141	0.1402	0.2071	0.2024	0.2014	0.1949			16:40:00	0.14535	0.130625	0.135	0.134275	0.129025	0.13275	0.132775	0.13065	0.148075	0.1334	0.195925	0.30585	0.4426	0.654275	0.61555	0.63	0.58905	0.56585	0.7171	0.623225	0.74905	0.73615	0.133875	0.796025
		0.1772	0.2079	0.1635	0.1566	0.1361	0.1384	0.1403	0.1361	0.1673	0.1634	0.1639	0.1627			16:50:00	0.145	0.130675	0.134975	0.13405	0.129	0.13275	0.13385	0.131775	0.150825	0.134825	0.202025	0.31775	0.4575	0.66765	0.627825	0.6446	0.595625	0.5752	0.7185	0.62815	0.75545	0.74105	0.13395	0.80475
		0.1798	0.2092	0.17	0.1481	0.1388	0.1426	0.1378	0.1401	0.155	0.1584	0.1489	0.1527			17:00:00	0.169475	0.130425	0.134775	0.1342	0.1289	0.132625	0.1326	0.13055	0.22835	0.13565	0.210025	0.4359	0.47675	0.683125	0.63865	0.657775	0.601025	0.575625	0.725275	0.632625	0.75635	0.744825	0.13385	0.8026
		0.1724	0.1884	0.1666	0.1475	0.141	0.1504	0.137	0.137	0.1443	0.1412	0.1451	0.1391			17:10:00	0.14445	0.1303	0.1347	0.134	0.1288	0.132675	0.1326	0.130575	0.23195	0.136325	0.2152	0.4463	0.492425	0.6954	0.64875	0.670775	0.605375	0.5828	0.7261	0.63725	0.7615	0.75	0.1339	0.8092
		0.1681	0.1646	0.151	0.1418	0.1373	0.1376	0.1363	0.139	0.1379	0.1409	0.1376	0.1405			17:20:00	0.144275	0.13025	0.134375	0.1338	0.1289	0.132375	0.13245	0.130625	0.23485	0.137425	0.224675	0.46195	0.512075	0.70895	0.658025	0.681475	0.610025	0.583225	0.7315	0.639	0.7619	0.752025	0.13375	0.806775
		0.1708	0.1686	0.1492	0.1443	0.1374	0.1375	0.1423	0.1384	0.1369	0.1376	0.1406	0.1382			17:30:00	0.14905	0.13005	0.1346	0.1338	0.128675	0.132325	0.132375	0.13055	0.239075	0.1386	0.230175	0.47985	0.528975	0.7189	0.667325	0.693375	0.612975	0.589275	0.731125	0.64285	0.766575	0.7556	0.133775	0.813625
		0.171	0.1643	0.1505	0.144	0.1427	0.1443	0.1365	0.1378	0.1399	0.141	0.1392	0.1461			17:40:00	0.143975	0.130025	0.13455	0.133625	0.12865	0.132125	0.132275	0.130675	0.24235	0.140175	0.240175	0.4719	0.549825	0.730875	0.67485	0.70335	0.616675	0.58945	0.7358	0.645475	0.76545	0.757275	0.13375	0.81095
		0.159	0.1644	0.1466	0.1433	0.1443	0.1381	0.139	0.1385	0.1371	0.1411	0.1388	0.1334			17:50:00	0.143825	0.129825	0.1341	0.1338	0.12865	0.13205	0.132325	0.1306	0.246675	0.141825	0.2463	0.565575	0.565975	0.739225	0.680975	0.71275	0.6197	0.5955	0.734775	0.6474	0.76855	0.759875	0.13375	0.816625
																18:00:00	0.14365	0.1296	0.134325	0.133525	0.12845	0.132	0.132075	0.13085	0.3256	0.14405	0.257475	0.558925	0.585625	0.7496	0.688975	0.7205	0.6221	0.595225	0.7385	0.64835	0.76735	0.761125	0.133675	0.8132
2:00:00	37.00	0.1778	0.1976	0.1633	0.1463	0.1405	0.1414	0.1408	0.1402	0.1991	0.1951	0.1991	0.1912			18:10:00	0.1433	0.129825	0.1342	0.1334	0.128975	0.132	0.13205	0.131025	0.331825	0.14645	0.2648	0.575925	0.600675	0.75665	0.694825	0.72845	0.623775	0.600475	0.7368	0.649775	0.77085	0.762475	0.133725	0.818675
		0.1765	0.1987	0.1605	0.1548	0.135	0.1381	0.1401	0.136	0.1634	0.1624	0.1598	0.159			18:20:00	0.143	0.129475	0.13415	0.133375	0.1282	0.131975	0.13225	0.1315	0.28695	0.14935	0.27705	0.65	0.6186	0.765275	0.7003	0.73595	0.625425	0.599	0.7407	0.650725	0.769375	0.764275	0.13365	0.814875
		0.1793	0.1986	0.1657	0.1468	0.1382	0.1424	0.1374	0.1401	0.1527	0.1559	0.1476	0.1524			18:30:00	0.1429	0.1294	0.13405	0.133475	0.12815	0.1319	0.13215	0.131625	0.193225	0.1524	0.284125	0.633225	0.631475	0.770975	0.70565	0.742	0.6263	0.6043	0.7385	0.651875	0.772175	0.765625	0.133625	0.819725
		0.1719	0.1883	0.1669	0.147	0.141	0.1511	0.1371	0.1371	0.1442	0.1406	0.144	0.1387			18:40:00	0.1473	0.129325	0.134425	0.1331	0.12845	0.1319	0.13305	0.13325	0.347775	0.1562	0.298675	0.498125	0.6482	0.736675	0.710625	0.747975	0.627525	0.60365	0.742025	0.652375	0.7699	0.765125	0.13355	0.8156
		0.1689	0.1631	0.1492	0.1419	0.1367	0.1374	0.136	0.1389	0.1383	0.1402	0.1373	0.1398			18:50:00	0.142625	0.129375	0.1343	0.1329	0.12815	0.131675	0.131875	0.13255	0.354625	0.16035	0.3077	0.512925	0.659025	0.740775	0.714575	0.75295	0.62855	0.608325	0.739775	0.653425	0.7718	0.766725	0.1336	0.820275
		0.1717	0.1638	0.1479	0.1441	0.1368	0.1373	0.1421	0.1384	0.1369	0.1377	0.1405	0.1382			19:00:00	0.142625	0.129575	0.134725	0.1329	0.12805	0.131675	0.13175	0.133175	0.3604	0.164725	0.32315	0.525925	0.673	0.747375	0.71805	0.757275	0.62935	0.6055	0.742625	0.653525	0.769375	0.7666	0.133525	0.8165
		0.1699	0.1617	0.1499	0.1447	0.1424	0.1442	0.1363	0.1378	0.1397	0.1407	0.1394	0.1457			19:10:00	0.142075	0.128875	0.134275	0.1328	0.128025	0.131525	0.1317	0.1337	0.3683	0.1682	0.3318	0.539525	0.6813	0.7501	0.7202	0.761675	0.6302	0.610525	0.740125	0.654225	0.771525	0.76755	0.133525	0.820325
		0.1599	0.1626	0.1458	0.1433	0.1435	0.1382	0.1389	0.1384	0.1371	0.1411	0.1384	0.1329			19:20:00	0.14195	0.128925	0.134525	0.132725	0.1278	0.13155	0.1328	0.135525	0.374925	0.173875	0.3488	0.552275	0.693825	0.755425	0.7235	0.7658	0.630075	0.60875	0.742975	0.653625	0.768325	0.767725	0.133525	0.815625
																19:30:00	0.14215	0.1288	0.134225	0.13265	0.12785	0.13145	0.1316	0.1351	0.3588	0.178575	0.359525	0.725825	0.7009	0.758	0.7265	0.7687	0.63015	0.613275	0.740225	0.6549	0.7706	0.76775	0.1335	0.81985
2:10:00	37.00	0.1768	0.1971	0.1625	0.1451	0.14	0.1412	0.1407	0.1391	0.195	0.1953	0.1923	0.1878			19:40:00	0.1418	0.1288	0.133775	0.132425	0.1277	0.13155	0.131625	0.135475	0.24345	0.183675	0.3781	0.735125	0.711375	0.7606	0.73035	0.7723	0.630325	0.61485	0.7367	0.657025	0.772875	0.7675	0.133475	0.818075
		0.175	0.1978	0.1596	0.154	0.1353	0.1378	0.1402	0.1349	0.1627	0.1595	0.1604	0.158			19:50:00	0.142	0.128525	0.13425	0.132575	0.127525	0.13135	0.13145	0.136375	0.326525	0.18865	0.459325	0.74295	0.717075	0.763975	0.730725	0.7464	0.63065	0.615325	0.73995	0.654825	0.770075	0.767675	0.1336	0.8202
		0.1767	0.2026	0.1662	0.145	0.1382	0.1415	0.1376	0.1388	0.1519	0.1549	0.1456	0.1513			20:00:00	0.141675	0.128575	0.133825	0.132375	0.127575	0.131325	0.13255	0.13885	0.332625	0.1936	0.481625	0.7477	0.726525	0.768075	0.73295	0.748075	0.6311	0.61275	0.74235	0.6547	0.76655	0.767275	0.133475	0.81585
		0.1696	0.1849	0.1627	0.1445	0.14	0.1527	0.1369	0.1358	0.1429	0.1401	0.1435	0.1388			20:10:00	0.14165	0.1284	0.134025	0.13225	0.127525	0.131275	0.1326	0.139275	0.34335	0.199025	0.4893	0.7544	0.54025	0.768175	0.734225	0.758475	0.6314	0.61715	0.739675	0.65505	0.768275	0.76625	0.133475	0.820025
		0.1661	0.1625	0.1484	0.1391	0.1369	0.1372	0.1357	0.1377	0.1377	0.1401	0.1366	0.1397			20:20:00	0.1424	0.129475	0.13365	0.132225	0.12745	0.1311	0.131325	0.139075	0.37625	0.20385	0.490375	0.758625	0.5486	0.7721	0.73585	0.75885	0.63145	0.614375	0.74195	0.6542	0.76535	0.7665	0.1335	0.814775
		0.1685	0.1595	0.1476	0.1422	0.1366	0.1373	0.1421	0.137	0.1366	0.1376	0.1402	0.138			20:30:00	0.14125	0.12835	0.13325	0.1322	0.127375	0.131025	0.13105	0.1412	0.3083	0.20875	0.507025	0.7501	0.55095	0.773975	0.735625	0.760775	0.631075	0.61145	0.739575	0.651425	0.7611	0.765775	0.133425	0.8151
		0.1685	0.1579	0.1499	0.1426	0.142	0.1441	0.1363	0.1364	0.1396	0.1407	0.1389	0.1456			20:40:00	0.1412	0.12825	0.133075	0.13215	0.127325	0.1311	0.1311	0.141775	0.34635	0.21435	0.522575	0.764025	0.5577	0.7749	0.73815	0.82935	0.631175	0.616575	0.740475	0.653575	0.764025	0.76475	0.133325	0.812925
		0.1574	0.1571	0.1463	0.1419	0.143	0.1382	0.1389	0.1372	0.137	0.1408	0.1385	0.1329			20:50:00	0.1411	0.128	0.132975	0.1319	0.127275	0.131075	0.131125	0.142625	0.3338	0.21955	0.534125	0.766325	0.55925	0.774725	0.7385	0.8326	0.6309	0.737375	0.7368	0.6537	0.765875	0.7649	0.1334	0.817175
																21:00:00	0.140925	0.1281	0.13315	0.131925	0.127275	0.130875	0.130975	0.144325	0.3184	0.223725	0.5976	0.76775	0.5659	0.77685	0.738675	0.766975	0.630575	0.734725	0.739275	0.652875	0.762675	0.763475	0.13335	0.8128
2:20:00	37.00	0.1774	0.1948	0.1586	0.143	0.1398	0.1397	0.1405	0.14	0.1913	0.1903	0.1895	0.1827			21:10:00	0.1437	0.1281	0.13305	0.1318	0.12715	0.13085	0.131	0.145925	0.331725	0.229225	0.606275	0.771175	0.56695	0.77645	0.73925	0.768725	0.63015	0.73725	0.735675	0.653525	0.76385	0.763825	0.1334	0.81675
		0.1765	0.1963	0.1591	0.1531	0.1347	0.1366	0.1399	0.1358	0.1611	0.1588	0.1579	0.1564			21:20:00	0.140575	0.127925	0.133	0.13195	0.127075	0.130775	0.132225	0.1498	0.316175	0.23325	0.624975	0.769825	0.572175	0.778775	0.7394	0.7696	0.6293	0.733825	0.73805	0.6522	0.760625	0.761875	0.13325	0.8116
		0.1784	0.2012	0.1609	0.1442	0.1374	0.1405	0.137	0.1397	0.1516	0.1559	0.1453	0.15			21:30:00	0.140875	0.1278	0.133025	0.132775	0.12825	0.1306	0.1308	0.151225	0.326525	0.236975	0.638875	0.732475	0.572375	0.77945	0.739	0.77115	0.629225	0.729175	0.735625	0.648875	0.7559	0.761275	0.133325	0.811375
		0.1716	0.1827	0.1606	0.1443	0.14	0.1513	0.1364	0.1369	0.1432	0.1399	0.1418	0.1376			21:40:00	0.1403	0.12765	0.132875	0.131775	0.127	0.13055	0.1306	0.153175	0.3158	0.243	0.6501	0.735675	0.578525	0.779525	0.7405	0.77115	0.628425	0.732125	0.7366	0.651175	0.758825	0.761125	0.133175	0.80995
		0.1667	0.1617	0.1479	0.1398	0.1365	0.1357	0.1358	0.1386	0.1371	0.14	0.1355	0.1397			21:50:00	0.14125	0.127775	0.13325	0.131525	0.12685	0.130575	0.130775	0.155425	0.354875	0.24845	0.633375	0.73955	0.5775	0.7789	0.74035	0.7731	0.627875	0.7344	0.733425	0.650675	0.7606	0.760675	0.13325	0.81365
		0.1696	0.1584	0.1467	0.1412	0.1364	0.1357	0.142	0.138	0.1365	0.1373	0.1394	0.1379			22:00:00	0.140175	0.1283	0.13285	0.131425	0.1268	0.13055	0.1308	0.233875	0.3396	0.25315	0.6502	0.7415	0.5826	0.78	0.74035	0.772525	0.627575	0.7309	0.735025	0.65	0.756825	0.75985	0.133125	0.8084
		0.1701	0.1577	0.1481	0.1419	0.1422	0.1428	0.1361	0.1375	0.1393	0.1404	0.1377	0.1457			22:10:00	0.140125	0.127475	0.13295	0.13135	0.12675	0.13035	0.1305	0.1622	0.3169	0.409125	0.65505	0.743575	0.5821	0.779475	0.7402	0.83925	0.709125	0.733375	0.73135	0.64925	0.758325	0.7592	0.133225	0.813
		0.16	0.1598	0.1444	0.1411	0.143	0.1367	0.1386	0.1381	0.1368	0.1407	0.137	0.1329			22:20:00	0.13995	0.127475	0.133125	0.131325	0.126725	0.13035	0.130525	0.241075	0.33595	0.41405	0.68015	0.7445	0.885975	0.8443	0.739975	0.8372	0.714125	0.720425	0.73285	0.648175	0.755575	0.75805	0.1331	0.80685
																22:30:00	0.13995	0.12725	0.1332	0.131375	0.1266	0.13045	0.130525	0.2456	0.343625	0.4518	0.68155	0.74985	0.852075	0.85575	0.739375	0.77385	0.708625	0.7259	0.730875	0.644925	0.750875	0.75695	0.133125	0.807575
2:30:00	37.00	0.1752	0.1877	0.1586	0.144	0.1382	0.1408	0.1405	0.14	0.19	0.1889	0.1842	0.1797			22:40:00	0.1398	0.12725	0.13325	0.131325	0.126575	0.1302	0.130475	0.2418	0.34755	0.41325	0.592425	0.7492	0.851625	0.8439	0.7397	0.8375	0.70815	0.62105	0.7316	0.647025	0.753675	0.75655	0.133025	0.80645
		0.1759	0.1953	0.1579	0.1534	0.1334	0.1374	0.1399	0.1358	0.1599	0.1568	0.1566	0.1552			22:50:00	0.13975	0.1271	0.133325	0.131125	0.126475	0.130225	0.1301	0.2462	0.35395	0.4851	0.51825	0.77265	0.8503	0.843225	0.838175	0.8388	0.7068	0.73135	0.72815	0.647275	0.75525	0.757375	0.13305	0.8108
		0.1762	0.1962	0.1597	0.1452	0.1364	0.1407	0.1371	0.1414	0.1508	0.155	0.1457	0.149			23:00:00	0.139375	0.126975	0.1327	0.131	0.126475	0.130075	0.13035	0.210875	0.459475	0.4974	0.5766	0.7726	0.851875	0.84345	0.739125	0.83755	0.706975	0.8226	0.83165	0.666475	0.7521	0.75615	0.13295	0.80555
		0.1694	0.1794	0.1594	0.1455	0.1388	0.1524	0.1364	0.1368	0.1428	0.1399	0.1426	0.1377			23:10:00	0.1394	0.126925	0.13225	0.130975	0.126275	0.13	0.1301	0.238775	0.4434	0.5104	0.5773	0.771525	0.850375	0.842525	0.783625	0.8387	0.705525	0.8907	0.82825	0.66665	0.753875	0.7558	0.133025	0.810175
		0.1665	0.1567	0.1465	0.14	0.1351	0.137	0.1357	0.1386	0.1375	0.1401	0.137	0.1394			23:20:00	0.13935	0.1268	0.132025	0.1309	0.12635	0.12995	0.1301	0.24375	0.449375	0.4941	0.58315	0.7305	0.85305	0.8427	0.738125	0.9231	0.7309	0.62165	0.779275	0.870125	0.75075	0.79165	0.13255	0.805025
		0.1666	0.155	0.146	0.142	0.135	0.1371	0.1418	0.1382	0.1364	0.1371	0.1402	0.1377			23:30:00	0.139	0.12685	0.132125	0.130875	0.1263	0.129925	0.131325	0.25005	0.452125	0.513075	0.5835	0.731975	0.850925	0.8422	0.738725	0.8995	0.84915	0.624425	0.8282	0.8709	0.752375	0.7548	0.133	0.80975
		0.1713	0.1578	0.1479	0.1432	0.1405	0.1438	0.1362	0.1375	0.1396	0.1404	0.1389	0.146			23:40:00	0.1394	0.126825	0.13225	0.130775	0.1264	0.12975	0.130125	0.2554	0.474	0.321275	0.543	0.7322	0.597675	0.7799	0.7384	0.773475	0.623675	0.62165	0.728525	0.6449	0.74925	0.75345	0.1329	0.80435
		0.1593	0.1553	0.1443	0.1418	0.1415	0.138	0.1386	0.1381	0.1369	0.1407	0.1382	0.133			23:50:00	0.13915	0.12665	0.132275	0.130775	0.1262	0.12985	0.131175	0.28115	0.46705	0.329925	0.5461	0.685225	0.59485	0.7805	0.736675	0.77335	0.623575	0.6184	0.726625	0.6408	0.745475	0.753175	0.132925	0.805175
																24:00:00	0.1388	0.126575	0.13215	0.1307	0.12615	0.129675	0.130025	0.2917	0.4991	0.34035	0.550225	0.6834	0.598775	0.779625	0.736975	0.7733	0.6231	0.62145	0.727475	0.64375	0.748975	0.752625	0.13285	0.804225
2:40:00	37.00	0.1742	0.1869	0.1577	0.1437	0.1378	0.1407	0.1401	0.1397	0.1853	0.1847	0.1845	0.179
		0.1726	0.1882	0.1556	0.1529	0.1334	0.1373	0.1394	0.1355	0.1577	0.156	0.1542	0.1542
		0.1776	0.1926	0.1595	0.1444	0.136	0.141	0.1374	0.1395	0.1486	0.1534	0.1443	0.1486
		0.1692	0.1739	0.1606	0.1437	0.1386	0.1527	0.1361	0.1368	0.1423	0.1393	0.1426	0.1379
		0.1664	0.1551	0.1463	0.1394	0.1351	0.1368	0.1354	0.1384	0.137	0.1396	0.1365	0.1393
		0.169	0.1545	0.1457	0.1419	0.135	0.1368	0.1415	0.1378	0.1362	0.1369	0.1399	0.1378
		0.1679	0.1545	0.1471	0.1425	0.1404	0.1436	0.136	0.1374	0.1392	0.1402	0.1388	0.1455
		0.1584	0.1543	0.1439	0.1417	0.1413	0.1379	0.1384	0.1379	0.1368	0.1405	0.1382	0.1328
2:50:00	37.00	0.1813	0.1868	0.1555	0.1428	0.1392	0.1394	0.14	0.1398	0.186	0.183	0.1786	0.1785
		0.1732	0.1818	0.1502	0.1515	0.1342	0.136	0.1397	0.1356	0.1581	0.154	0.1541	0.1538
		0.1754	0.1908	0.1565	0.1439	0.1368	0.1397	0.1369	0.1397	0.1495	0.1534	0.1431	0.1493
		0.167	0.1707	0.1589	0.1438	0.1392	0.1503	0.1363	0.1367	0.1422	0.1391	0.1419	0.1374
		0.1645	0.1543	0.1454	0.1392	0.136	0.1355	0.1357	0.1385	0.137	0.1397	0.1366	0.1389
		0.1676	0.1537	0.1455	0.1415	0.1361	0.1357	0.1415	0.1379	0.1364	0.1369	0.1399	0.1374
		0.1671	0.1545	0.1468	0.1424	0.1416	0.1422	0.136	0.1374	0.1386	0.1403	0.1386	0.1455
		0.1562	0.1542	0.1431	0.1414	0.1422	0.1365	0.1382	0.1378	0.1367	0.1404	0.1379	0.1329
3:00:00	37.00	0.1758	0.181	0.155	0.1413	0.1392	0.1397	0.1401	0.1396	0.1816	0.1777	0.1757	0.1749
		0.1735	0.1825	0.1537	0.1503	0.1336	0.1358	0.1399	0.1354	0.1555	0.1515	0.1524	0.1524
		0.1756	0.1852	0.1585	0.1418	0.1369	0.1393	0.1369	0.1394	0.1489	0.1523	0.1428	0.1476
		0.1687	0.1727	0.157	0.142	0.1389	0.1494	0.1362	0.1366	0.1417	0.1386	0.1418	0.1377
		0.1649	0.1521	0.1453	0.1378	0.1361	0.1354	0.1354	0.1384	0.1367	0.1398	0.1365	0.1387
		0.1676	0.1527	0.1455	0.1402	0.1357	0.1357	0.1413	0.1379	0.1364	0.1369	0.1396	0.1374
		0.1663	0.1525	0.1459	0.1405	0.1412	0.142	0.1358	0.1371	0.1388	0.1398	0.1385	0.1452
		0.1563	0.1521	0.1423	0.1399	0.1422	0.1367	0.138	0.1378	0.1366	0.1402	0.1377	0.1328
3:10:00	37.00	0.179	0.1779	0.1538	0.1417	0.1388	0.1403	0.1389	0.1395	0.1785	0.172	0.1747	0.1712
		0.1726	0.1787	0.1482	0.1505	0.1336	0.1371	0.1383	0.1353	0.156	0.1517	0.1516	0.1518
		0.1755	0.1819	0.1525	0.1426	0.1364	0.1404	0.1356	0.1394	0.1487	0.1523	0.1419	0.1478
		0.1666	0.1689	0.1571	0.1429	0.1385	0.1496	0.1349	0.1365	0.1412	0.1384	0.1414	0.1372
		0.1634	0.1532	0.1445	0.139	0.1358	0.1366	0.1341	0.1383	0.1366	0.1392	0.1361	0.1387
		0.1668	0.1511	0.1441	0.1411	0.1357	0.1367	0.1402	0.1377	0.1356	0.1371	0.1397	0.1375
		0.1687	0.1526	0.1454	0.1415	0.1409	0.1429	0.1344	0.1371	0.1386	0.1397	0.1384	0.1452
		0.1571	0.1483	0.1415	0.1414	0.1417	0.138	0.1369	0.1377	0.1366	0.1402	0.1377	0.1328
3:20:00	37.00	0.1745	0.1769	0.1523	0.1411	0.1377	0.1401	0.1389	0.1395	0.1781	0.1749	0.1705	0.1714
		0.1725	0.1762	0.1512	0.1507	0.1336	0.1369	0.1381	0.1355	0.1542	0.15	0.1485	0.1504
		0.1749	0.1806	0.1555	0.1418	0.1364	0.1403	0.1354	0.1394	0.1481	0.152	0.1406	0.1474
		0.1663	0.1681	0.155	0.1425	0.1382	0.1485	0.1346	0.1364	0.1413	0.1379	0.1398	0.1371
		0.164	0.1499	0.1441	0.1385	0.1355	0.1367	0.1341	0.1382	0.1366	0.1394	0.1349	0.1385
		0.1665	0.1507	0.144	0.141	0.1358	0.1366	0.1399	0.1377	0.1356	0.1368	0.1383	0.1374
		0.1678	0.1515	0.1448	0.1413	0.141	0.1426	0.1344	0.137	0.1383	0.1396	0.1371	0.1452
		0.1568	0.1512	0.1411	0.1407	0.1417	0.1373	0.1368	0.1376	0.1365	0.1401	0.1365	0.1326
3:30:00	37.00	0.1738	0.1744	0.1521	0.1415	0.1377	0.1391	0.1398	0.1394	0.1746	0.172	0.1703	0.1686
		0.1721	0.176	0.1475	0.1493	0.1332	0.1355	0.139	0.1352	0.1538	0.1493	0.1492	0.1498
		0.1745	0.179	0.1558	0.1417	0.1363	0.1387	0.1364	0.1392	0.1475	0.1514	0.1419	0.1464
		0.1668	0.167	0.1522	0.1424	0.1381	0.1469	0.1358	0.1364	0.1412	0.1382	0.1411	0.1367
		0.164	0.1493	0.1437	0.1383	0.1357	0.1351	0.1351	0.1382	0.1363	0.1389	0.1358	0.1383
		0.1666	0.1499	0.1431	0.1405	0.1354	0.1354	0.1412	0.1376	0.1354	0.1366	0.1393	0.1371
		0.1676	0.1502	0.1445	0.1411	0.1412	0.1415	0.1355	0.137	0.1382	0.1397	0.1383	0.1452
		0.1567	0.1485	0.141	0.1401	0.1415	0.1363	0.1378	0.1375	0.1365	0.14	0.1376	0.1328
3:40:00	37.00	0.1754	0.1748	0.1517	0.1396	0.1365	0.1398	0.1397	0.1393	0.1709	0.1678	0.167	0.1667
		0.1717	0.1714	0.148	0.1477	0.1322	0.1369	0.1391	0.1352	0.1529	0.1484	0.1471	0.1493
		0.1747	0.1772	0.1531	0.1401	0.1347	0.1401	0.1363	0.1391	0.1465	0.1513	0.1405	0.1464
		0.1669	0.1639	0.1509	0.1406	0.1365	0.1478	0.1355	0.1363	0.1406	0.1379	0.1392	0.1363
		0.1632	0.148	0.1428	0.1371	0.1348	0.1366	0.1351	0.1382	0.1363	0.1384	0.1346	0.1381
		0.1662	0.1486	0.1433	0.139	0.1342	0.1366	0.1409	0.1376	0.1353	0.1364	0.138	0.1371
		0.1683	0.1499	0.1445	0.1395	0.1396	0.1425	0.1354	0.137	0.1382	0.1395	0.137	0.1449
		0.1562	0.147	0.14	0.1388	0.1404	0.1373	0.1376	0.1375	0.1364	0.1399	0.1363	0.1325
3:50:00	37.00	0.1747	0.1719	0.1504	0.1394	0.1374	0.1393	0.1394	0.1393	0.1716	0.1704	0.1675	0.1634
		0.1708	0.1738	0.1497	0.1488	0.1331	0.1362	0.1389	0.1353	0.1503	0.1478	0.1468	0.1486
		0.1745	0.1756	0.1527	0.1412	0.1354	0.1396	0.1363	0.139	0.1461	0.15	0.1403	0.1459
		0.1672	0.1651	0.1522	0.1418	0.1378	0.1482	0.1354	0.1363	0.1405	0.1381	0.1391	0.1359
		0.1644	0.1488	0.1426	0.1382	0.1352	0.1362	0.1351	0.1381	0.1362	0.1385	0.1341	0.1382
		0.1659	0.1477	0.1426	0.14	0.1351	0.1362	0.141	0.1376	0.1352	0.1364	0.1375	0.137
		0.1657	0.148	0.1427	0.1403	0.1405	0.1423	0.1355	0.1369	0.1381	0.1397	0.1369	0.1449
		0.1573	0.1467	0.1393	0.1399	0.1411	0.1371	0.1379	0.1374	0.1365	0.1399	0.1363	0.1325
4:00:00	37.00	0.1749	0.1695	0.1507	0.14	0.1372	0.1387	0.1385	0.139	0.169	0.164	0.1656	0.1613
		0.1709	0.1676	0.1459	0.1482	0.1328	0.1354	0.1378	0.135	0.1503	0.1472	0.1462	0.1478
		0.1745	0.171	0.1518	0.141	0.1354	0.1382	0.1353	0.1389	0.1465	0.1498	0.1399	0.1461
		0.167	0.1623	0.1502	0.141	0.1376	0.1468	0.1343	0.1364	0.1406	0.1374	0.139	0.136
		0.163	0.149	0.1423	0.138	0.1352	0.1352	0.1342	0.1381	0.1359	0.1384	0.1342	0.1378
		0.1659	0.1494	0.142	0.1401	0.1353	0.1352	0.1398	0.1376	0.1353	0.1362	0.1374	0.1367
		0.1664	0.1485	0.143	0.1404	0.1406	0.1411	0.1344	0.1368	0.1382	0.1395	0.1367	0.1447
		0.1564	0.1471	0.1399	0.1397	0.1409	0.1365	0.1365	0.1374	0.1363	0.1398	0.1364	0.1323
4:10:00	37.00	0.1774	0.1693	0.1484	0.1379	0.1356	0.1381	0.1384	0.1389	0.1675	0.1662	0.1639	0.1596
		0.1705	0.1668	0.1474	0.1469	0.1316	0.1354	0.1376	0.1351	0.1499	0.1464	0.1462	0.1471
		0.1742	0.1709	0.1505	0.139	0.1338	0.138	0.1351	0.1389	0.1454	0.1491	0.1408	0.1451
		0.1661	0.1606	0.1506	0.1399	0.1364	0.1465	0.1338	0.1362	0.1403	0.1372	0.14	0.1352
		0.1635	0.147	0.142	0.1367	0.1342	0.135	0.1339	0.138	0.1359	0.1384	0.1356	0.138
		0.1656	0.1462	0.1424	0.1388	0.1338	0.135	0.1398	0.1377	0.1354	0.1362	0.1385	0.1368
		0.1694	0.1488	0.1424	0.1393	0.1392	0.1411	0.1345	0.1368	0.1379	0.1393	0.1377	0.1448
		0.1564	0.1449	0.1389	0.1383	0.1398	0.1361	0.1364	0.1374	0.1365	0.1397	0.1374	0.1323
4:20:00	37.00	0.1759	0.1665	0.147	0.139	0.1361	0.139	0.1384	0.1389	0.1624	0.1654	0.1632	0.1583
		0.1716	0.1651	0.1442	0.1476	0.1313	0.1362	0.1376	0.1349	0.1482	0.1456	0.1439	0.1463
		0.1731	0.1679	0.1489	0.1397	0.1337	0.1394	0.1349	0.1387	0.1441	0.1492	0.1405	0.1448
		0.1653	0.16	0.1489	0.1405	0.1362	0.1475	0.134	0.1361	0.1389	0.1369	0.1398	0.1356
		0.1633	0.1456	0.1403	0.1372	0.134	0.1363	0.1339	0.138	0.1344	0.1384	0.1355	0.1379
		0.166	0.1452	0.1402	0.1398	0.1348	0.1361	0.1393	0.1376	0.1339	0.1361	0.1384	0.1368
		0.1668	0.147	0.1413	0.14	0.1393	0.1418	0.1342	0.1367	0.1367	0.1394	0.1376	0.1445
		0.1562	0.1457	0.1377	0.1391	0.1397	0.1372	0.1365	0.1373	0.135	0.1397	0.1375	0.1323
4:30:00	37.00	0.1741	0.165	0.1464	0.1378	0.1356	0.1379	0.1384	0.1378	0.1662	0.1601	0.1611	0.1574
		0.1709	0.1635	0.1446	0.1463	0.1314	0.1352	0.1373	0.1338	0.1489	0.1459	0.1428	0.1456
		0.1736	0.169	0.1478	0.1381	0.1335	0.1382	0.1349	0.1376	0.1452	0.1492	0.1397	0.1444
		0.1671	0.1585	0.1477	0.1394	0.1358	0.146	0.1338	0.1348	0.1398	0.1369	0.1391	0.1355
		0.1627	0.146	0.1396	0.1362	0.1338	0.1348	0.1338	0.1369	0.1354	0.1381	0.1353	0.1376
		0.1654	0.1452	0.1404	0.1379	0.1336	0.1347	0.1394	0.1366	0.135	0.1361	0.1383	0.1366
		0.1713	0.1459	0.1406	0.1384	0.139	0.1406	0.1341	0.1356	0.1379	0.1392	0.1375	0.1444
		0.1543	0.1429	0.1373	0.1377	0.1392	0.1358	0.1365	0.1361	0.1362	0.1396	0.1374	0.1323
4:40:00	37.00	0.1765	0.1628	0.1464	0.1388	0.1353	0.1392	0.1392	0.1387	0.163	0.1591	0.1575	0.1574
		0.1703	0.1597	0.1421	0.147	0.1309	0.1365	0.1386	0.1349	0.1476	0.1447	0.1428	0.1451
		0.173	0.1674	0.147	0.1392	0.1334	0.139	0.1361	0.1386	0.1448	0.1486	0.1394	0.1443
		0.1678	0.1581	0.1469	0.1403	0.1356	0.1471	0.1349	0.1359	0.14	0.1365	0.1395	0.1355
		0.1629	0.1448	0.1399	0.1371	0.1337	0.1358	0.1349	0.1382	0.1356	0.1379	0.1354	0.1376
		0.1647	0.1519	0.1399	0.1392	0.1336	0.136	0.1405	0.1379	0.1349	0.1362	0.1383	0.1365
		0.1683	0.1456	0.1406	0.1397	0.1391	0.1416	0.1352	0.1367	0.1378	0.1392	0.1375	0.1446
		0.1555	0.1436	0.1373	0.139	0.1396	0.1368	0.1388	0.1372	0.1361	0.1395	0.1377	0.1325
4:50:00	37.00	0.1758	0.1626	0.1452	0.1383	0.1361	0.1391	0.1379	0.1388	0.1602	0.1599	0.1579	0.1556
		0.1708	0.1625	0.1455	0.1467	0.1322	0.1362	0.1371	0.1348	0.1474	0.1449	0.1429	0.1443
		0.173	0.1646	0.1478	0.1388	0.1343	0.1394	0.1348	0.1385	0.1445	0.1486	0.1396	0.144
		0.1676	0.1577	0.1481	0.1398	0.1369	0.1472	0.1337	0.1359	0.1397	0.1368	0.1393	0.1352
		0.1624	0.145	0.1404	0.1371	0.1348	0.1357	0.1338	0.1382	0.1356	0.1377	0.135	0.1377
		0.1659	0.1436	0.1409	0.1389	0.1347	0.1356	0.139	0.1381	0.135	0.1361	0.138	0.1365
		0.1706	0.1445	0.1412	0.1395	0.1404	0.1414	0.134	0.1367	0.1376	0.1394	0.1376	0.1443
		0.1565	0.1424	0.1381	0.1388	0.1403	0.137	0.1362	0.1372	0.1361	0.1394	0.1377	0.1322
5:00:00	37.00	0.1887	0.1592	0.1463	0.1369	0.1351	0.1393	0.1388	0.1386	0.1581	0.1597	0.1574	0.1549
		0.1846	0.1593	0.1439	0.145	0.1311	0.1362	0.1382	0.1347	0.1462	0.1434	0.1405	0.1442
		0.1866	0.1607	0.1475	0.1373	0.1331	0.139	0.136	0.1385	0.1441	0.1464	0.1385	0.1433
		0.1817	0.1579	0.1472	0.1384	0.1355	0.147	0.1348	0.1358	0.1393	0.135	0.1378	0.1351
		0.1755	0.1436	0.14	0.1358	0.1338	0.1358	0.135	0.1385	0.1352	0.1365	0.1338	0.1373
		0.1773	0.1543	0.1401	0.1374	0.1335	0.1358	0.1402	0.1385	0.1347	0.1348	0.1369	0.1366
		0.1763	0.1447	0.1407	0.1382	0.139	0.1416	0.1353	0.1366	0.1379	0.1384	0.1365	0.1444
		0.1669	0.1421	0.1376	0.1377	0.1389	0.1369	0.1375	0.1372	0.136	0.1383	0.1368	0.1326
5:10:00	37.00	0.1849	0.1593	0.1453	0.1368	0.1348	0.1389	0.1388	0.1386	0.1581	0.1563	0.1563	0.1531
		0.1818	0.16	0.1449	0.1448	0.1307	0.1362	0.1379	0.1347	0.1464	0.1445	0.1416	0.1436
		0.185	0.1623	0.1459	0.1372	0.1328	0.139	0.1357	0.1384	0.1442	0.1479	0.1393	0.1438
		0.1777	0.1564	0.1468	0.1386	0.1352	0.147	0.1347	0.1358	0.1396	0.1361	0.1387	0.1348
		0.174	0.1437	0.1401	0.1356	0.1336	0.1356	0.1348	0.1387	0.1351	0.1377	0.1348	0.1375
		0.1769	0.1432	0.1403	0.1376	0.1334	0.1359	0.1402	0.1389	0.1347	0.1359	0.138	0.1367
		0.1746	0.1445	0.1407	0.1381	0.1391	0.1413	0.1351	0.1367	0.1378	0.1395	0.1376	0.1443
		0.1657	0.1414	0.1375	0.1376	0.1388	0.1372	0.1375	0.1374	0.1359	0.1394	0.1379	0.1325
5:20:00	37.00	0.1839	0.1599	0.1453	0.1372	0.1349	0.1384	0.139	0.1385	0.1559	0.1571	0.1559	0.1518
		0.1803	0.1617	0.1444	0.1457	0.1304	0.1366	0.1379	0.1346	0.1458	0.1434	0.1407	0.1434
		0.1832	0.1621	0.1461	0.1379	0.1329	0.1385	0.1358	0.1384	0.1436	0.1469	0.1391	0.1433
		0.1756	0.155	0.1469	0.1396	0.1354	0.1469	0.1351	0.1358	0.1393	0.1361	0.1386	0.1344
		0.1741	0.1438	0.1397	0.1367	0.1336	0.1356	0.1348	0.1392	0.1352	0.1375	0.135	0.1372
		0.1769	0.1446	0.14	0.139	0.1334	0.1359	0.1401	0.1395	0.1346	0.1357	0.1377	0.1366
		0.1724	0.1425	0.1405	0.1389	0.1392	0.1413	0.1351	0.1365	0.1379	0.1395	0.1375	0.1443
		0.1638	0.1397	0.1374	0.1383	0.139	0.1367	0.1372	0.1373	0.136	0.1394	0.1384	0.1325
5:30:00	37.00	0.1819	0.1587	0.1434	0.1364	0.1358	0.1385	0.139	0.1385	0.155	0.1557	0.153	0.1508
		0.1797	0.1564	0.1424	0.1443	0.1316	0.1372	0.1382	0.1346	0.1452	0.1425	0.1408	0.1432
		0.1838	0.159	0.1456	0.1369	0.1336	0.1387	0.1356	0.1383	0.1434	0.1474	0.1385	0.143
		0.1744	0.1538	0.1457	0.138	0.1363	0.1468	0.1354	0.1357	0.1393	0.1359	0.1386	0.1346
		0.1716	0.1424	0.1396	0.1355	0.1344	0.1357	0.1346	0.1397	0.1351	0.1375	0.1348	0.1372
		0.1753	0.1439	0.1397	0.1371	0.1346	0.1357	0.14	0.1405	0.1345	0.1358	0.1379	0.1367
		0.1725	0.1428	0.1402	0.1377	0.1402	0.1413	0.1351	0.1365	0.138	0.1398	0.1373	0.1443
		0.1618	0.1414	0.1371	0.1371	0.1398	0.1366	0.1372	0.1376	0.136	0.1392	0.1387	0.1329
5:40:00	37.00	0.1828	0.1557	0.1408	0.1374	0.1348	0.1383	0.1379	0.1384	0.1532	0.1561	0.1543	0.1498
		0.1794	0.1556	0.1407	0.1451	0.1304	0.1372	0.1365	0.1345	0.1439	0.1424	0.1404	0.1431
		0.1825	0.1591	0.1442	0.1378	0.1324	0.139	0.1345	0.1382	0.1421	0.1469	0.1389	0.143
		0.1759	0.1537	0.1449	0.1391	0.1347	0.1464	0.134	0.1356	0.1379	0.1357	0.1385	0.1346
		0.1728	0.142	0.1383	0.1361	0.1333	0.1357	0.1335	0.1405	0.1338	0.1371	0.135	0.137
		0.1753	0.1426	0.1381	0.1383	0.1335	0.1358	0.1389	0.1414	0.1334	0.1355	0.1379	0.1368
		0.172	0.1426	0.1387	0.1387	0.1394	0.1413	0.1339	0.1365	0.1368	0.14	0.1375	0.1443
		0.1611	0.1412	0.1358	0.1383	0.1387	0.1365	0.1361	0.1377	0.1348	0.1392	0.1397	0.1333
5:50:00	37.00	0.1814	0.1542	0.1418	0.1358	0.1344	0.1384	0.1376	0.1384	0.1523	0.1555	0.1527	0.1493
		0.1787	0.1541	0.1419	0.1439	0.1306	0.1376	0.1369	0.1345	0.1432	0.142	0.1404	0.1424
		0.1834	0.1559	0.1444	0.1367	0.1324	0.1385	0.1343	0.1381	0.1416	0.146	0.1384	0.1426
		0.1727	0.1514	0.1456	0.1374	0.1345	0.1466	0.1344	0.1357	0.1375	0.1357	0.138	0.1344
		0.1709	0.14	0.1387	0.1348	0.1331	0.1354	0.1335	0.1415	0.1339	0.1371	0.1348	0.1367
		0.1734	0.1404	0.1395	0.1371	0.1331	0.1356	0.1392	0.1432	0.1334	0.1357	0.138	0.1371
		0.172	0.1413	0.14	0.1374	0.1394	0.1412	0.134	0.1367	0.1372	0.1407	0.1376	0.144
		0.1604	0.1394	0.1367	0.1366	0.1384	0.1366	0.1359	0.1382	0.1349	0.1393	0.14	0.1334
6:00:00	37.00	0.1792	0.1542	0.1418	0.1365	0.1357	0.1384	0.1392	0.1383	0.1518	0.1536	0.1529	0.149
		0.1765	0.1527	0.1428	0.1448	0.1315	0.1383	0.1376	0.1344	0.143	0.142	0.1402	0.1423
		0.1843	0.1551	0.1448	0.1374	0.1333	0.1386	0.1357	0.138	0.1417	0.1457	0.1383	0.1426
		0.1737	0.1508	0.1452	0.1388	0.136	0.1463	0.1359	0.1356	0.1379	0.1356	0.1381	0.1342
		0.1704	0.1406	0.1389	0.136	0.1347	0.1354	0.135	0.143	0.1337	0.1374	0.1348	0.1368
		0.1734	0.1407	0.1392	0.1379	0.1343	0.1356	0.1398	0.1444	0.1331	0.1355	0.1382	0.1371
		0.1729	0.1408	0.1396	0.1385	0.1409	0.1412	0.1352	0.1366	0.1375	0.1412	0.1376	0.1441
		0.1612	0.1379	0.1366	0.1379	0.1395	0.1368	0.137	0.1384	0.1349	0.1393	0.1417	0.134
6:10:00	37.00	0.1776	0.1514	0.1396	0.1362	0.1341	0.1374	0.1392	0.1382	0.1516	0.154	0.1499	0.1487
		0.1764	0.1526	0.1417	0.1445	0.1303	0.1382	0.1376	0.1344	0.1437	0.1412	0.1387	0.1415
		0.1795	0.1527	0.1435	0.1373	0.1323	0.1372	0.1354	0.1379	0.1424	0.1451	0.137	0.1421
		0.172	0.1497	0.1442	0.1384	0.1344	0.1453	0.1364	0.1356	0.1386	0.1354	0.1367	0.134
		0.1708	0.1402	0.1373	0.1359	0.1327	0.1341	0.135	0.1447	0.1348	0.1372	0.1335	0.1369
		0.1703	0.1392	0.1373	0.1376	0.1332	0.1343	0.1395	0.1474	0.1343	0.1354	0.1373	0.1373
		0.1697	0.1403	0.1382	0.1382	0.1401	0.1403	0.1351	0.1369	0.1412	0.1419	0.1365	0.1441
		0.1584	0.1373	0.1353	0.1377	0.1382	0.1356	0.1371	0.1394	0.136	0.1394	0.1417	0.1348
6:20:00	37.00	0.1779	0.1524	0.1397	0.136	0.134	0.1381	0.1392	0.1381	0.149	0.152	0.1496	0.1473
		0.1752	0.1539	0.1402	0.1444	0.13	0.1403	0.1377	0.1343	0.1439	0.1414	0.1397	0.1416
		0.1788	0.1545	0.143	0.1368	0.1317	0.1381	0.1352	0.138	0.142	0.1451	0.1381	0.1419
		0.171	0.1504	0.1434	0.1385	0.1346	0.1464	0.1374	0.1356	0.1388	0.1352	0.1376	0.134
		0.1698	0.1401	0.1373	0.1356	0.1328	0.1354	0.135	0.1471	0.1348	0.1369	0.1343	0.1366
		0.1704	0.1452	0.1376	0.1377	0.1328	0.1355	0.1396	0.1492	0.1343	0.1355	0.1382	0.1379
		0.1685	0.141	0.1383	0.1378	0.1404	0.1413	0.1353	0.1368	0.14	0.1429	0.138	0.144
		0.1588	0.1392	0.1352	0.1378	0.1382	0.1366	0.1371	0.14	0.136	0.1395	0.1464	0.1357
6:30:00	37.00	0.1786	0.1504	0.1391	0.135	0.1341	0.1369	0.1386	0.1382	0.1485	0.1517	0.1493	0.1466
		0.1757	0.1506	0.1407	0.1427	0.1297	0.141	0.1366	0.1342	0.1417	0.1405	0.1381	0.1406
		0.1783	0.1515	0.1421	0.1354	0.1322	0.1372	0.1343	0.1379	0.1407	0.1448	0.1366	0.1417
		0.1698	0.1491	0.1436	0.1371	0.1343	0.1452	0.1368	0.1355	0.1374	0.135	0.1361	0.1339
		0.1685	0.1383	0.1369	0.1343	0.1331	0.1341	0.134	0.1499	0.1334	0.1371	0.1331	0.1365
		0.1705	0.1384	0.1375	0.1364	0.133	0.1344	0.1385	0.154	0.133	0.1355	0.1375	0.1386
		0.1711	0.1393	0.1379	0.1368	0.1412	0.1404	0.1342	0.1371	0.1401	0.1443	0.1373	0.144
		0.1586	0.1372	0.1345	0.1362	0.1382	0.1355	0.1362	0.1419	0.135	0.1396	0.1471	0.1369
6:40:00	37.00	0.1788	0.1505	0.14	0.1359	0.1351	0.137	0.1401	0.1381	0.1492	0.1514	0.1496	0.1463
		0.1774	0.1511	0.1414	0.1441	0.1314	0.1432	0.1377	0.1342	0.1428	0.1409	0.139	0.1407
		0.1793	0.1525	0.1432	0.137	0.1332	0.1373	0.1353	0.1378	0.1419	0.1446	0.1377	0.1417
		0.173	0.1496	0.1445	0.1382	0.1352	0.1451	0.1398	0.1355	0.1384	0.135	0.1376	0.1341
		0.1692	0.1404	0.1378	0.1357	0.1343	0.1339	0.1356	0.1532	0.1347	0.1372	0.1346	0.1364
		0.1709	0.1392	0.1385	0.1373	0.1342	0.1344	0.1395	0.1569	0.1342	0.1356	0.1391	0.1392
		0.1707	0.1401	0.1388	0.1379	0.1433	0.1405	0.1356	0.1374	0.1422	0.1459	0.1388	0.1442
		0.1601	0.1376	0.1359	0.1375	0.1392	0.1358	0.1374	0.1427	0.1362	0.1398	0.1526	0.1388
6:50:00	37.00	0.1779	0.1489	0.1396	0.136	0.1341	0.138	0.1403	0.1381	0.1478	0.1496	0.148	0.1456
		0.1772	0.1485	0.1409	0.1441	0.1297	0.1468	0.1374	0.1344	0.142	0.1399	0.1388	0.1407
		0.1798	0.1512	0.1426	0.1366	0.1316	0.1381	0.1354	0.1378	0.1419	0.1443	0.1373	0.1414
		0.1724	0.1481	0.1442	0.1381	0.1341	0.1459	0.1408	0.1354	0.1383	0.135	0.1372	0.1337
		0.1681	0.1379	0.1378	0.1355	0.1327	0.135	0.1358	0.1579	0.1348	0.1374	0.1345	0.1365
		0.1708	0.1391	0.1383	0.1373	0.1332	0.1355	0.1393	0.1635	0.1342	0.1356	0.1394	0.1404
		0.171	0.1388	0.1388	0.1376	0.1431	0.142	0.1361	0.1379	0.1438	0.1481	0.1395	0.1445
		0.159	0.1363	0.1357	0.1372	0.1379	0.1369	0.1374	0.1454	0.1363	0.14	0.1558	0.1413
7:00:00	37.00	0.1778	0.1482	0.1395	0.1344	0.1345	0.138	0.14	0.1379	0.146	0.15	0.1462	0.1446
		0.1765	0.1504	0.141	0.1423	0.1308	0.1505	0.1364	0.1341	0.1414	0.14	0.1372	0.1401
		0.1793	0.1514	0.1429	0.1347	0.1332	0.138	0.1342	0.1375	0.1401	0.1439	0.1362	0.1411
		0.1719	0.1486	0.1437	0.1366	0.1353	0.1459	0.1427	0.1354	0.1372	0.1346	0.136	0.1336
		0.1689	0.1391	0.1377	0.1342	0.1339	0.1351	0.135	0.1632	0.1332	0.137	0.1335	0.1364
		0.1717	0.1394	0.1381	0.1362	0.1344	0.1355	0.1382	0.1668	0.1327	0.1356	0.1386	0.1418
		0.1699	0.1401	0.1386	0.1363	0.1454	0.1425	0.1355	0.1382	0.1446	0.1502	0.1391	0.145
		0.1599	0.1368	0.1356	0.1362	0.1391	0.1372	0.1367	0.1464	0.1353	0.1402	0.1616	0.144
7:10:00	37.00	0.1768	0.1481	0.1383	0.1344	0.1347	0.1379	0.1422	0.1379	0.1461	0.1492	0.1463	0.1443
		0.175	0.1495	0.1393	0.1423	0.1307	0.1545	0.1375	0.134	0.1418	0.1399	0.1384	0.1399
		0.1767	0.1506	0.1403	0.135	0.1328	0.1379	0.1352	0.1375	0.1412	0.1439	0.1369	0.141
		0.1696	0.1487	0.1425	0.1368	0.1349	0.1461	0.1453	0.1353	0.138	0.1348	0.1367	0.1334
		0.1661	0.1386	0.1363	0.134	0.1339	0.135	0.1368	0.169	0.1347	0.137	0.1349	0.1362
		0.1685	0.1387	0.1367	0.1362	0.1349	0.1356	0.1393	0.1737	0.1337	0.1358	0.1408	0.1443
		0.1685	0.1394	0.1372	0.1362	0.1475	0.143	0.1371	0.1392	0.148	0.1539	0.1416	0.1451
		0.1574	0.1366	0.1341	0.1359	0.139	0.1373	0.1381	0.1497	0.1367	0.1404	0.1654	0.148
7:20:00	37.00	0.1774	0.1475	0.1379	0.1344	0.134	0.1369	0.1439	0.138	0.145	0.1481	0.1465	0.1444
		0.1765	0.1481	0.1395	0.1419	0.1296	0.1591	0.1374	0.1341	0.1414	0.1392	0.1382	0.1397
		0.1784	0.1498	0.1409	0.1348	0.1314	0.1371	0.1353	0.1375	0.1412	0.144	0.1372	0.141
		0.1716	0.1476	0.1424	0.1365	0.1337	0.1446	0.1496	0.1353	0.1383	0.1346	0.1369	0.1335
		0.1667	0.138	0.1361	0.1339	0.1326	0.1338	0.138	0.1756	0.1348	0.1369	0.135	0.1359
		0.1696	0.1374	0.1365	0.136	0.1337	0.1344	0.1394	0.1775	0.1338	0.1357	0.1416	0.1489
		0.1701	0.1377	0.1372	0.1361	0.1485	0.1426	0.1378	0.14	0.1499	0.1575	0.1437	0.1449
		0.16	0.1363	0.1342	0.1357	0.138	0.1364	0.1385	0.151	0.1368	0.141	0.1722	0.1508
7:30:00	37.00	0.1752	0.1462	0.138	0.1344	0.1337	0.1371	0.1443	0.138	0.1446	0.1479	0.1457	0.143
		0.1759	0.147	0.139	0.142	0.1296	0.1655	0.1363	0.1341	0.1413	0.1389	0.1378	0.1393
		0.1762	0.1489	0.1413	0.1345	0.1314	0.1371	0.134	0.1376	0.141	0.1438	0.137	0.1407
		0.1694	0.1463	0.1424	0.1362	0.1337	0.1445	0.1505	0.1353	0.1377	0.1346	0.1367	0.1332
		0.1665	0.1365	0.1357	0.1336	0.1327	0.1339	0.1377	0.1823	0.1346	0.137	0.1353	0.136
		0.1666	0.1371	0.1367	0.1359	0.1343	0.1346	0.1382	0.1863	0.1337	0.1358	0.1428	0.1521
		0.1713	0.1372	0.1367	0.136	0.1518	0.1437	0.1379	0.1413	0.1532	0.1623	0.1458	0.1461
		0.1593	0.1351	0.1339	0.1357	0.1379	0.137	0.1378	0.1558	0.1372	0.1414	0.1753	0.1575
7:40:00	37.00	0.1742	0.1448	0.1375	0.1341	0.1336	0.1373	0.1476	0.1378	0.1435	0.1476	0.1454	0.143
		0.1726	0.1469	0.1389	0.1416	0.1292	0.1732	0.1374	0.1339	0.1397	0.1389	0.1374	0.1391
		0.1776	0.1483	0.1403	0.1346	0.1313	0.1369	0.1353	0.1374	0.1398	0.1436	0.1369	0.1409
		0.1692	0.1469	0.1417	0.1358	0.1336	0.1445	0.1578	0.1352	0.1368	0.1342	0.1365	0.1331
		0.1664	0.1364	0.1358	0.1337	0.1326	0.1339	0.1406	0.1897	0.1337	0.137	0.1356	0.136
		0.169	0.1408	0.1364	0.1356	0.1344	0.1346	0.1394	0.1903	0.1326	0.136	0.1437	0.1563
		0.1679	0.1376	0.1368	0.1361	0.1553	0.1452	0.1405	0.1425	0.1554	0.1658	0.1483	0.1469
		0.1584	0.135	0.1338	0.1358	0.1381	0.1373	0.14	0.1569	0.1365	0.142	0.1847	0.163
7:50:00	37.00	0.1813	0.1461	0.1372	0.134	0.1336	0.1391	0.1495	0.1378	0.1437	0.1478	0.1442	0.1423
		0.1732	0.1461	0.1369	0.1414	0.1294	0.1821	0.137	0.1339	0.1408	0.1389	0.1366	0.1387
		0.1754	0.149	0.1399	0.1344	0.1313	0.1394	0.1342	0.1375	0.141	0.1433	0.1354	0.1405
		0.167	0.1466	0.1418	0.1357	0.1335	0.1459	0.1592	0.1352	0.1378	0.1342	0.1349	0.1333
		0.1645	0.1372	0.1355	0.1337	0.1322	0.135	0.1407	0.1974	0.1349	0.137	0.1353	0.1364
		0.1676	0.1376	0.1363	0.1357	0.1353	0.136	0.1385	0.2007	0.1336	0.1363	0.1448	0.1611
		0.1671	0.1381	0.1365	0.1356	0.1596	0.1476	0.1415	0.1451	0.1612	0.1722	0.1509	0.1481
		0.1562	0.1364	0.1337	0.1354	0.1379	0.1392	0.1393	0.1632	0.138	0.1431	0.1888	0.1703
8:00:00	37.00	0.1758	0.1452	0.1374	0.1349	0.1344	0.1394	0.1547	0.1378	0.1432	0.1462	0.1446	0.1425
		0.1735	0.1465	0.1382	0.1423	0.1303	0.1916	0.1378	0.1338	0.1409	0.1386	0.1372	0.1387
		0.1756	0.1468	0.1399	0.1353	0.1323	0.1382	0.1353	0.1373	0.1405	0.143	0.1365	0.1403
		0.1687	0.1455	0.1415	0.1367	0.1347	0.1456	0.1687	0.135	0.1376	0.1342	0.1363	0.1332
		0.1649	0.1359	0.1355	0.1347	0.1334	0.1351	0.1445	0.2045	0.1352	0.1371	0.1368	0.136
		0.1676	0.1373	0.1362	0.1366	0.1375	0.1365	0.1401	0.2053	0.1336	0.1364	0.1467	0.1625
		0.1663	0.1365	0.1364	0.1369	0.1652	0.1502	0.1447	0.1468	0.1647	0.1763	0.1556	0.1497
		0.1563	0.1352	0.1337	0.1365	0.1393	0.14	0.1414	0.1643	0.1386	0.1435	0.1997	0.1783
8:10:00	37.00	0.179	0.1438	0.1371	0.1339	0.1332	0.1386	0.1589	0.1378	0.1428	0.1464	0.1438	0.142
		0.1726	0.145	0.1378	0.1414	0.1291	0.1998	0.1381	0.1339	0.1405	0.1386	0.1372	0.1389
		0.1755	0.1463	0.1389	0.1343	0.131	0.1373	0.1351	0.1372	0.1402	0.1432	0.1362	0.1406
		0.1666	0.1448	0.1412	0.1356	0.1332	0.1447	0.1722	0.1351	0.1377	0.1343	0.1362	0.1333
		0.1634	0.136	0.1352	0.1333	0.132	0.1341	0.1463	0.213	0.1354	0.1372	0.1378	0.136
		0.1668	0.1361	0.1359	0.1351	0.1377	0.1354	0.14	0.2171	0.1335	0.1369	0.1502	0.1693
		0.1687	0.1368	0.1366	0.1358	0.1699	0.151	0.1476	0.1504	0.17	0.1831	0.1612	0.152
		0.1571	0.1343	0.1334	0.1352	0.1383	0.1403	0.1425	0.1725	0.1394	0.1452	0.2033	0.1864
8:20:00	37.00	0.1745	0.1445	0.1365	0.1346	0.1333	0.1397	0.1641	0.1376	0.1425	0.1456	0.144	0.1403
		0.1725	0.1452	0.1371	0.1423	0.1294	0.2099	0.1387	0.1337	0.1401	0.138	0.137	0.1375
		0.1749	0.1478	0.1392	0.135	0.1308	0.138	0.1353	0.1371	0.1403	0.1427	0.1363	0.1391
		0.1663	0.1458	0.1414	0.1367	0.1333	0.1441	0.1828	0.1349	0.1375	0.1342	0.1361	0.1331
		0.164	0.1373	0.1351	0.1344	0.1318	0.1346	0.1499	0.2211	0.1356	0.1373	0.1387	0.1345
		0.1665	0.1429	0.1359	0.1363	0.1394	0.1355	0.1404	0.2224	0.1337	0.137	0.1518	0.1729
		0.1678	0.1377	0.1362	0.1372	0.1751	0.1544	0.1507	0.1524	0.174	0.1874	0.166	0.1527
		0.1568	0.1349	0.1335	0.1367	0.1383	0.1415	0.1438	0.1741	0.1403	0.1464	0.2147	0.1916
8:30:00	37.00	0.1738	0.1431	0.1365	0.1335	0.1333	0.1408	0.1693	0.1376	0.1411	0.1457	0.1432	0.1409
		0.1721	0.1442	0.1371	0.141	0.1288	0.2209	0.1395	0.1337	0.1391	0.138	0.1367	0.1383
		0.1745	0.1459	0.1385	0.134	0.1308	0.1375	0.1352	0.1372	0.1388	0.1427	0.1359	0.1401
		0.1668	0.1438	0.1409	0.1352	0.1329	0.1443	0.1869	0.1349	0.1363	0.134	0.1359	0.1333
		0.164	0.1356	0.1349	0.133	0.132	0.1345	0.1526	0.2308	0.135	0.1379	0.1404	0.136
		0.1666	0.1357	0.1357	0.135	0.1416	0.1364	0.1412	0.236	0.1323	0.138	0.1559	0.1826
		0.1676	0.1364	0.1361	0.1356	0.1816	0.1572	0.155	0.1565	0.179	0.1949	0.1733	0.1568
		0.1567	0.1341	0.1332	0.1352	0.1389	0.1435	0.1456	0.1841	0.1401	0.1487	0.2181	0.2012
8:40:00	37.00	0.1754	0.1431	0.1362	0.1334	0.1335	0.1431	0.1762	0.1375	0.1425	0.1447	0.1432	0.1409
		0.1717	0.1441	0.1365	0.141	0.1291	0.2324	0.1404	0.1338	0.1397	0.1381	0.1365	0.1384
		0.1747	0.1454	0.1393	0.1339	0.1309	0.1392	0.1357	0.1371	0.1402	0.1426	0.1362	0.14
		0.1669	0.1442	0.1411	0.1353	0.1332	0.1453	0.1999	0.1348	0.1376	0.1338	0.1361	0.1333
		0.1632	0.1352	0.1348	0.1329	0.1317	0.136	0.1571	0.2398	0.1368	0.1381	0.1413	0.1355
		0.1662	0.1357	0.1358	0.1352	0.1439	0.1379	0.1421	0.2423	0.1334	0.1385	0.1572	0.188
		0.1683	0.1361	0.1362	0.1354	0.1883	0.1619	0.1589	0.1588	0.1844	0.2007	0.1784	0.1593
		0.1562	0.1336	0.133	0.1351	0.1395	0.1469	0.1471	0.1866	0.1424	0.1505	0.2306	0.2072
8:50:00	37.00	0.1747	0.1432	0.1373	0.1335	0.1334	0.1441	0.1825	0.1376	0.1406	0.145	0.1428	0.1402
		0.1708	0.1438	0.1373	0.1408	0.1288	0.2423	0.1412	0.1336	0.1395	0.1379	0.1366	0.1377
		0.1745	0.1458	0.1402	0.1337	0.1307	0.1384	0.1359	0.137	0.1397	0.1424	0.1357	0.1398
		0.1672	0.1435	0.1418	0.1351	0.1329	0.144	0.2049	0.1349	0.1373	0.134	0.1356	0.1332
		0.1644	0.135	0.1358	0.133	0.1318	0.1352	0.1603	0.2491	0.1378	0.1389	0.1446	0.1359
		0.1659	0.1353	0.1366	0.1353	0.1472	0.1371	0.143	0.2558	0.1333	0.1398	0.1632	0.1966
		0.1657	0.1359	0.1372	0.1353	0.1958	0.1645	0.1643	0.1642	0.1918	0.2088	0.1878	0.1633
		0.1573	0.1337	0.1342	0.135	0.1401	0.1481	0.1496	0.1976	0.1438	0.1542	0.2338	0.217
9:00:00	37.00	0.1749	0.1419	0.1359	0.1334	0.1335	0.146	0.1905	0.1375	0.1409	0.1445	0.1423	0.1404
		0.1709	0.1434	0.1361	0.1405	0.1288	0.2542	0.1435	0.1336	0.1394	0.1377	0.1365	0.1379
		0.1745	0.1447	0.1386	0.1338	0.1307	0.1393	0.1357	0.1369	0.1396	0.1424	0.1359	0.1397
		0.167	0.1435	0.1403	0.1351	0.1331	0.1443	0.2189	0.1347	0.1374	0.1339	0.1359	0.1333
		0.163	0.1353	0.1348	0.1329	0.1321	0.1355	0.1668	0.2585	0.1388	0.1394	0.146	0.1359
		0.1659	0.1351	0.1356	0.1351	0.1522	0.138	0.144	0.2634	0.1331	0.141	0.1645	0.2022
		0.1664	0.1355	0.136	0.135	0.2036	0.1693	0.1698	0.1669	0.1972	0.2148	0.193	0.1667
		0.1564	0.1333	0.1332	0.1349	0.1412	0.1509	0.1518	0.2004	0.1461	0.1569	0.2482	0.2229
9:10:00	37.00	0.1774	0.1415	0.1359	0.1333	0.1338	0.1502	0.1989	0.1374	0.1399	0.144	0.142	0.1411
		0.1705	0.1427	0.1358	0.1405	0.1286	0.2659	0.1448	0.1335	0.1391	0.1373	0.1358	0.1377
		0.1742	0.1441	0.138	0.1334	0.1308	0.1412	0.1364	0.137	0.1396	0.1422	0.1358	0.1395
		0.1661	0.1435	0.1408	0.1352	0.1328	0.1452	0.2254	0.1347	0.1371	0.1339	0.1359	0.1334
		0.1635	0.1344	0.1343	0.1328	0.1317	0.1373	0.171	0.2696	0.1403	0.1404	0.1502	0.1361
		0.1656	0.1349	0.1351	0.1348	0.1553	0.1403	0.1458	0.2784	0.1332	0.1431	0.1716	0.2134
		0.1694	0.1352	0.1356	0.135	0.2126	0.1745	0.1761	0.1729	0.2049	0.2244	0.2028	0.1716
		0.1564	0.133	0.1328	0.1349	0.142	0.1556	0.1548	0.2135	0.1479	0.1622	0.2516	0.2337
9:20:00	37.00	0.1759	0.1414	0.1356	0.1344	0.1349	0.1526	0.2076	0.1375	0.1398	0.1441	0.1421	0.1399
		0.1716	0.1423	0.1361	0.1415	0.1297	0.2775	0.148	0.1336	0.139	0.1373	0.1356	0.1374
		0.1731	0.1442	0.139	0.1346	0.1319	0.1419	0.1365	0.1369	0.1394	0.1422	0.1356	0.1395
		0.1653	0.1424	0.1401	0.1362	0.1342	0.1457	0.2422	0.1346	0.1372	0.134	0.1357	0.1335
		0.1633	0.1344	0.1344	0.1339	0.1327	0.1382	0.1778	0.2801	0.142	0.1415	0.1529	0.1359
		0.166	0.1347	0.1352	0.1361	0.1615	0.141	0.1476	0.2861	0.1331	0.1449	0.1737	0.2201
		0.1668	0.1351	0.1356	0.1362	0.2219	0.1804	0.1809	0.176	0.2104	0.2308	0.2089	0.1756
		0.1562	0.1331	0.1332	0.136	0.1447	0.1589	0.1573	0.2179	0.1503	0.1648	0.2673	0.2389
9:30:00	37.00	0.1741	0.1401	0.1358	0.133	0.1343	0.1565	0.2159	0.1374	0.1398	0.1431	0.1414	0.1397
		0.1709	0.1416	0.1356	0.1403	0.1286	0.289	0.1509	0.1334	0.1392	0.1369	0.1355	0.1375
		0.1736	0.1436	0.1388	0.1337	0.1309	0.1433	0.1372	0.1369	0.1395	0.142	0.1355	0.1393
		0.1671	0.1426	0.1404	0.1346	0.133	0.1454	0.249	0.1347	0.137	0.1335	0.1355	0.1337
		0.1627	0.134	0.1338	0.1325	0.1314	0.1388	0.1829	0.2909	0.1446	0.1432	0.1585	0.1364
		0.1654	0.1346	0.135	0.1345	0.1664	0.1427	0.15	0.301	0.133	0.1478	0.1816	0.2312
		0.1713	0.135	0.1354	0.1348	0.231	0.1849	0.1881	0.1834	0.2201	0.2423	0.2193	0.1812
		0.1543	0.1327	0.1327	0.1346	0.1456	0.1633	0.1609	0.2319	0.1533	0.1715	0.2713	0.2496
9:40:00	37.00	0.1765	0.1419	0.1354	0.133	0.135	0.1597	0.2255	0.1374	0.1395	0.1431	0.1415	0.14
		0.1703	0.1431	0.1356	0.1398	0.1286	0.2978	0.1531	0.1334	0.139	0.1369	0.1359	0.1373
		0.173	0.1435	0.1385	0.1333	0.1311	0.1445	0.1379	0.1367	0.1394	0.1418	0.1355	0.1393
		0.1678	0.1432	0.1401	0.1344	0.1329	0.1438	0.2521	0.1346	0.1369	0.1335	0.1356	0.1342
		0.1629	0.1351	0.1339	0.1325	0.1311	0.139	0.1879	0.3011	0.1483	0.1451	0.1632	0.1365
		0.1647	0.1356	0.1349	0.1345	0.1727	0.1432	0.1538	0.3117	0.1331	0.1511	0.1879	0.2393
		0.1683	0.1361	0.1354	0.1347	0.2419	0.1889	0.1966	0.1889	0.2322	0.2523	0.2277	0.1872
		0.1555	0.1337	0.1325	0.1347	0.1477	0.1666	0.1662	0.24	0.1573	0.1784	0.2806	0.2597
9:50:00	37.00	0.1758	0.1405	0.1353	0.133	0.1355	0.1648	0.2365	0.1374	0.1391	0.1433	0.1409	0.1394
		0.1708	0.1406	0.1353	0.1397	0.129	0.3118	0.1577	0.1334	0.1383	0.1367	0.1362	0.1371
		0.173	0.1425	0.1378	0.1332	0.1309	0.1468	0.1386	0.1367	0.1391	0.1419	0.1354	0.139
		0.1676	0.1427	0.1399	0.1345	0.1329	0.145	0.2748	0.1346	0.1369	0.1336	0.1356	0.1335
		0.1624	0.1348	0.1337	0.1323	0.1314	0.1413	0.1958	0.3131	0.1505	0.1473	0.169	0.1369
		0.1659	0.1342	0.135	0.1344	0.179	0.1466	0.1561	0.324	0.133	0.154	0.1934	0.2497
		0.1706	0.1347	0.1354	0.1347	0.2514	0.1964	0.2017	0.1959	0.2366	0.2598	0.2357	0.1928
		0.1565	0.1323	0.1323	0.1348	0.1506	0.1724	0.1691	0.2512	0.1605	0.1831	0.2931	0.2665
10:00:00	37.00	0.1673	0.1402	0.1348	0.1327	0.1362	0.1688	0.2478	0.1372	0.1385	0.1431	0.1409	0.1388
		0.1601	0.1407	0.1355	0.1397	0.1283	0.3232	0.1625	0.1335	0.1385	0.1371	0.1358	0.1372
		0.1707	0.1419	0.1372	0.1331	0.1312	0.1485	0.14	0.1367	0.139	0.1415	0.1354	0.139
		0.1685	0.1416	0.14	0.1344	0.1334	0.145	0.2935	0.1345	0.1368	0.1335	0.1353	0.1347
		0.1413	0.1336	0.1338	0.1323	0.1317	0.1429	0.2045	0.3245	0.1541	0.1498	0.1747	0.1376
		0.1387	0.1344	0.1347	0.1345	0.1856	0.149	0.1593	0.3319	0.133	0.1571	0.1962	0.2572
		0.1387	0.1347	0.1352	0.1345	0.2614	0.2035	0.2078	0.2004	0.2439	0.2687	0.2426	0.1985
		0.1416	0.1323	0.1325	0.1347	0.1538	0.1777	0.1732	0.2557	0.1649	0.1886	0.3094	0.2723
10:10:00	37.00	0.1641	0.1398	0.1347	0.133	0.1372	0.1749	0.2594	0.1373	0.1387	0.1427	0.1405	0.1415
		0.155	0.1401	0.1353	0.1398	0.1283	0.3342	0.1663	0.1334	0.1385	0.1363	0.1353	0.1368
		0.1674	0.1422	0.1378	0.133	0.1313	0.1507	0.141	0.1366	0.139	0.1414	0.1351	0.1388
		0.168	0.1416	0.1408	0.1342	0.1336	0.1449	0.3012	0.1346	0.1366	0.1336	0.1355	0.1343
		0.1402	0.134	0.1334	0.1322	0.1315	0.1454	0.2099	0.3366	0.1582	0.153	0.1831	0.1379
		0.1379	0.1342	0.1346	0.1343	0.1938	0.1516	0.1637	0.3476	0.1328	0.1623	0.2071	0.271
		0.138	0.1342	0.1351	0.1345	0.2731	0.2097	0.2157	0.2102	0.2545	0.2821	0.2545	0.2059
		0.1412	0.1327	0.1322	0.1344	0.1571	0.1836	0.1783	0.2716	0.1696	0.1981	0.3158	0.2836
10:20:00	37.00	0.1621	0.1388	0.1347	0.1326	0.1387	0.1797	0.2711	0.1372	0.1379	0.1426	0.1408	0.1387
		0.1566	0.1412	0.1343	0.1394	0.1281	0.3455	0.1718	0.1332	0.1381	0.1366	0.1352	0.1367
		0.1668	0.1414	0.1368	0.1329	0.1321	0.1531	0.1428	0.1365	0.1393	0.1411	0.1352	0.1389
		0.1657	0.1412	0.1404	0.134	0.1343	0.1452	0.3214	0.1344	0.1367	0.1334	0.1355	0.135
		0.1383	0.1328	0.1336	0.1322	0.1317	0.1476	0.2196	0.3484	0.1624	0.1556	0.1907	0.1394
		0.1369	0.1338	0.1346	0.1342	0.2011	0.1544	0.1673	0.3559	0.133	0.1661	0.2109	0.2805
		0.1363	0.1342	0.135	0.1346	0.283	0.2179	0.2226	0.216	0.2625	0.2913	0.261	0.212
		0.1398	0.1321	0.1322	0.1344	0.1619	0.1898	0.1826	0.2757	0.1747	0.2037	0.3329	0.2898
10:30:00	37.00	0.1616	0.1387	0.1342	0.1325	0.1401	0.1871	0.2837	0.1361	0.138	0.1423	0.1397	0.1384
		0.1528	0.1401	0.1343	0.1394	0.1292	0.3558	0.1764	0.1323	0.138	0.1358	0.1354	0.1365
		0.1639	0.1412	0.1376	0.1328	0.1329	0.1563	0.1447	0.1353	0.1391	0.1412	0.1349	0.1389
		0.1647	0.141	0.1403	0.1341	0.1348	0.1453	0.3283	0.1332	0.1366	0.1332	0.1356	0.1343
		0.1381	0.1333	0.1334	0.1322	0.1316	0.1504	0.226	0.3583	0.1681	0.1599	0.2007	0.1403
		0.137	0.1339	0.1344	0.1343	0.2095	0.1577	0.1729	0.371	0.1328	0.1727	0.2237	0.294
		0.1365	0.1341	0.135	0.1343	0.295	0.2246	0.2317	0.2258	0.2743	0.3072	0.2727	0.2203
		0.1391	0.132	0.132	0.1344	0.1662	0.1957	0.19	0.2909	0.1803	0.2147	0.3406	0.302
10:40:00	37.00	0.1649	0.139	0.1343	0.1325	0.1428	0.1928	0.2979	0.137	0.1379	0.1417	0.1398	0.1386
		0.1522	0.1399	0.1344	0.1393	0.1282	0.3662	0.1832	0.1332	0.1378	0.1359	0.1349	0.1366
		0.1648	0.1408	0.1373	0.1325	0.1349	0.1588	0.1473	0.1365	0.1388	0.141	0.1347	0.1384
		0.1644	0.1406	0.14	0.134	0.1359	0.1456	0.3474	0.1343	0.1365	0.1333	0.1355	0.1341
		0.1382	0.1329	0.1334	0.1322	0.1319	0.1538	0.2369	0.371	0.173	0.1633	0.2099	0.1426
		0.1391	0.1338	0.1343	0.1341	0.2185	0.1616	0.1776	0.3812	0.1329	0.1778	0.2283	0.3031
		0.1359	0.1339	0.1347	0.1342	0.3054	0.2329	0.2384	0.2332	0.2827	0.3182	0.2808	0.2273
		0.1397	0.132	0.1322	0.1344	0.172	0.2029	0.1954	0.2969	0.1871	0.2213	0.3578	0.3074
10:50:00	37.00	0.1633	0.1385	0.1341	0.1321	0.1462	0.2016	0.3094	0.1371	0.1371	0.1406	0.1397	0.1383
		0.1526	0.1394	0.134	0.1392	0.1293	0.3761	0.1893	0.1332	0.1377	0.1342	0.135	0.1363
		0.1655	0.1405	0.1365	0.1325	0.1385	0.163	0.15	0.1364	0.1384	0.1397	0.1348	0.1387
		0.1642	0.1405	0.1393	0.1338	0.138	0.1459	0.3554	0.1344	0.1365	0.1321	0.1363	0.1384
		0.1387	0.133	0.1332	0.132	0.1334	0.1578	0.2425	0.3828	0.1796	0.1667	0.2206	0.1439
		0.1375	0.134	0.1341	0.1342	0.2289	0.1662	0.1845	0.3982	0.1328	0.1843	0.2416	0.3196
		0.137	0.1337	0.1346	0.1344	0.3173	0.2395	0.2482	0.2463	0.2946	0.3338	0.2929	0.2361
		0.1402	0.1318	0.1318	0.1341	0.178	0.2098	0.2024	0.3145	0.1933	0.2327	0.3664	0.3198
11:00:00	37.00	0.1591	0.1384	0.1338	0.1319	0.1492	0.2073	0.3234	0.137	0.137	0.1414	0.1396	0.1384
		0.1528	0.1395	0.1336	0.139	0.128	0.3858	0.1967	0.1332	0.1375	0.1355	0.1346	0.1363
		0.1624	0.1406	0.1359	0.1324	0.1417	0.1661	0.1536	0.1363	0.1385	0.1407	0.1345	0.1384
		0.1625	0.1433	0.1391	0.1337	0.1392	0.1466	0.3751	0.1342	0.1363	0.1331	0.1365	0.138
		0.1369	0.133	0.1331	0.132	0.1328	0.1621	0.2542	0.3941	0.1854	0.1716	0.2312	0.1471
		0.1357	0.1336	0.1343	0.1342	0.2375	0.1708	0.1892	0.4085	0.1328	0.1912	0.2467	0.3285
		0.1363	0.1335	0.1347	0.1344	0.327	0.2496	0.256	0.253	0.303	0.3469	0.3007	0.2434
		0.1395	0.1315	0.1316	0.1343	0.1836	0.2172	0.2082	0.3187	0.2013	0.2397	0.3857	0.326
11:10:00	37.00	0.1601	0.1381	0.1339	0.1322	0.1534	0.2172	0.3366	0.1371	0.1365	0.1416	0.1392	0.1378
		0.1517	0.139	0.1336	0.1389	0.1282	0.3954	0.2021	0.1332	0.1373	0.1354	0.1349	0.1362
		0.1618	0.1402	0.1374	0.1322	0.1458	0.1712	0.1569	0.1363	0.1383	0.1408	0.1348	0.138
		0.1614	0.14	0.139	0.1337	0.1408	0.147	0.3809	0.1343	0.1363	0.1332	0.1366	0.1348
		0.1378	0.1323	0.133	0.132	0.1334	0.1667	0.2599	0.4063	0.1929	0.1767	0.2431	0.1492
		0.1354	0.1331	0.134	0.1341	0.248	0.176	0.198	0.4254	0.1325	0.1999	0.2613	0.3464
		0.1353	0.1337	0.1347	0.1341	0.3382	0.2568	0.2656	0.2664	0.3158	0.3648	0.3143	0.2532
		0.1389	0.1313	0.1315	0.1341	0.1895	0.2252	0.2167	0.3374	0.2084	0.2522	0.394	0.3384
11:20:00	37.00	0.1599	0.1383	0.1338	0.1332	0.1602	0.2245	0.3521	0.1369	0.1364	0.141	0.1393	0.1383
		0.1539	0.1391	0.1339	0.1398	0.128	0.4053	0.2106	0.1331	0.1371	0.1355	0.1345	0.1359
		0.1634	0.1402	0.1369	0.1335	0.151	0.1765	0.1623	0.1362	0.1383	0.1406	0.1345	0.1383
		0.1617	0.1397	0.1388	0.135	0.1445	0.1476	0.4011	0.1342	0.1364	0.1331	0.1362	0.1381
		0.1378	0.1324	0.1326	0.1331	0.1344	0.1718	0.2728	0.4189	0.1992	0.1812	0.2544	0.1541
		0.1366	0.1331	0.134	0.1355	0.2582	0.182	0.2032	0.4364	0.1324	0.2072	0.2668	0.3552
		0.1369	0.1332	0.1343	0.135	0.3492	0.2668	0.2739	0.274	0.3249	0.3784	0.3227	0.2616
		0.1399	0.1313	0.1317	0.1351	0.1964	0.2333	0.2234	0.3424	0.2182	0.2604	0.4108	0.3454
11:30:00	37.00	0.1576	0.1376	0.1338	0.1322	0.1661	0.2351	0.3671	0.1369	0.1364	0.1408	0.1391	0.1377
		0.1518	0.1388	0.1338	0.1388	0.1276	0.4147	0.2179	0.1331	0.1371	0.1354	0.1349	0.1357
		0.1619	0.1399	0.1366	0.1324	0.1561	0.1813	0.1678	0.1363	0.1381	0.1406	0.1342	0.138
		0.1603	0.1394	0.1385	0.1334	0.1474	0.1482	0.4092	0.1342	0.1365	0.133	0.1365	0.1384
		0.1359	0.1323	0.1328	0.1319	0.1357	0.1775	0.2797	0.431	0.2089	0.1874	0.2686	0.1572
		0.135	0.133	0.1338	0.1345	0.2696	0.1879	0.2115	0.4556	0.1323	0.2165	0.2825	0.3743
		0.135	0.1332	0.1343	0.1339	0.3605	0.2751	0.2851	0.2885	0.3399	0.3973	0.3362	0.2718
		0.1403	0.1317	0.1316	0.134	0.2032	0.2413	0.2329	0.3607	0.2265	0.2743	0.4223	0.3592
11:40:00	37.00	0.1579	0.1374	0.1346	0.1318	0.1748	0.2432	0.3863	0.137	0.1363	0.1405	0.1386	0.1377
		0.148	0.1383	0.1343	0.1386	0.1287	0.4234	0.2273	0.133	0.1371	0.1347	0.1344	0.1359
		0.1605	0.1397	0.1372	0.1321	0.1636	0.1872	0.1739	0.1361	0.1379	0.1403	0.1343	0.1381
		0.1598	0.1394	0.1399	0.1335	0.1535	0.1493	0.4293	0.1341	0.1363	0.1331	0.1364	0.1386
		0.136	0.1325	0.1338	0.1321	0.139	0.1836	0.2938	0.446	0.2155	0.1923	0.2814	0.1629
		0.1349	0.1332	0.135	0.1348	0.2821	0.1938	0.2181	0.4682	0.1324	0.2242	0.2886	0.3856
		0.1344	0.1329	0.1355	0.1338	0.3711	0.286	0.2948	0.2958	0.3486	0.4127	0.345	0.2801
		0.139	0.1309	0.1326	0.1339	0.2128	0.2499	0.2402	0.3659	0.2363	0.2809	0.4437	0.3662
11:50:00	37.00	0.1555	0.1372	0.1335	0.1321	0.1822	0.2547	0.3999	0.137	0.1358	0.1406	0.1387	0.1373
		0.1489	0.1382	0.1339	0.1384	0.129	0.4332	0.2362	0.133	0.1371	0.1356	0.1344	0.1358
		0.1589	0.1396	0.1368	0.1322	0.1692	0.1939	0.1794	0.1361	0.1381	0.1403	0.1343	0.1377
		0.1588	0.1393	0.1386	0.1333	0.1569	0.1505	0.4371	0.1341	0.1363	0.1335	0.1378	0.1406
		0.1357	0.1319	0.1325	0.132	0.1413	0.1898	0.2996	0.4589	0.2263	0.1998	0.2964	0.1667
		0.1348	0.1326	0.1337	0.1351	0.2947	0.2015	0.2279	0.4888	0.1323	0.2361	0.3044	0.4048
		0.1346	0.1327	0.1342	0.1337	0.3821	0.2952	0.306	0.3105	0.3643	0.4339	0.3597	0.2905
		0.1381	0.1316	0.1319	0.134	0.2195	0.2586	0.2496	0.3864	0.2457	0.2971	0.4541	0.3798
12:00:00	37.00	0.1547	0.1372	0.1333	0.1317	0.1909	0.2633	0.4198	0.1368	0.1357	0.1402	0.1384	0.1371
		0.1498	0.1383	0.1337	0.1383	0.1276	0.442	0.2476	0.133	0.1365	0.1351	0.1344	0.1356
		0.1589	0.1408	0.1366	0.1322	0.175	0.2004	0.188	0.136	0.1379	0.1401	0.1343	0.1379
		0.1593	0.1394	0.1383	0.1335	0.1622	0.1526	0.4598	0.1339	0.1365	0.1335	0.1378	0.1431
		0.1373	0.1317	0.1324	0.1318	0.1433	0.1966	0.3129	0.474	0.2343	0.2053	0.3101	0.1741
		0.1361	0.1327	0.1334	0.1357	0.3055	0.2074	0.2341	0.5027	0.1323	0.245	0.3102	0.4154
		0.1361	0.1328	0.134	0.1339	0.3923	0.3068	0.3154	0.3184	0.373	0.4515	0.3701	0.2993
		0.1395	0.1307	0.1313	0.1338	0.2275	0.2677	0.2576	0.393	0.2567	0.3027	0.4757	0.388
12:10:00	37.00	0.155	0.1367	0.1332	0.1318	0.2004	0.2751	0.4377	0.1369	0.1359	0.1404	0.1383	0.1369
		0.1494	0.1382	0.1334	0.1381	0.1287	0.4515	0.2568	0.1329	0.1366	0.1348	0.1343	0.1355
		0.1566	0.1389	0.1364	0.1319	0.1823	0.2082	0.1954	0.136	0.1375	0.14	0.1339	0.1378
		0.1576	0.1387	0.1382	0.1333	0.1677	0.1541	0.4677	0.134	0.1366	0.134	0.1387	0.1477
		0.1349	0.1318	0.1321	0.1319	0.147	0.2041	0.321	0.4881	0.2462	0.2133	0.3253	0.1791
		0.135	0.1327	0.1334	0.1362	0.3193	0.2159	0.2448	0.5263	0.1322	0.2565	0.3269	0.4344
		0.1346	0.1324	0.1339	0.1337	0.404	0.3156	0.329	0.3345	0.3878	0.4753	0.3837	0.3107
		0.1371	0.1306	0.1315	0.1338	0.2362	0.2774	0.2681	0.4148	0.2664	0.3206	0.4883	0.4033
12:20:00	37.00	0.1533	0.1366	0.1332	0.1319	0.2142	0.2867	0.4579	0.1367	0.1352	0.14	0.1379	0.1374
		0.1464	0.1382	0.1333	0.1379	0.1286	0.4609	0.2649	0.1329	0.1366	0.1347	0.1341	0.1355
		0.1572	0.1389	0.1363	0.1322	0.1892	0.2167	0.2043	0.1358	0.1374	0.1398	0.1339	0.1377
		0.156	0.1389	0.1382	0.1333	0.1747	0.1563	0.471	0.1339	0.1366	0.1348	0.14	0.155
		0.1347	0.1316	0.1321	0.132	0.1507	0.2121	0.3286	0.5038	0.262	0.2209	0.3405	0.1856
		0.1343	0.1325	0.1333	0.1368	0.3322	0.2231	0.2556	0.5456	0.1323	0.2694	0.3415	0.4492
		0.1339	0.1324	0.1339	0.1336	0.4154	0.3255	0.3449	0.3456	0.4081	0.5001	0.3978	0.3215
		0.1371	0.1306	0.1311	0.1336	0.243	0.2861	0.281	0.4274	0.278	0.3361	0.5047	0.4175
12:30:00	37.00	0.152	0.1365	0.1332	0.1329	0.2218	0.2964	0.48	0.1368	0.1353	0.1399	0.1383	0.1372
		0.148	0.1373	0.1334	0.1391	0.1286	0.4719	0.2775	0.1328	0.1364	0.1347	0.1342	0.1353
		0.1571	0.1385	0.1363	0.1332	0.1978	0.2238	0.2145	0.1359	0.1375	0.1399	0.1338	0.1375
		0.156	0.1386	0.1378	0.1343	0.1807	0.1588	0.5023	0.1339	0.1369	0.1353	0.1419	0.1622
		0.1345	0.1315	0.132	0.1333	0.1544	0.2199	0.3435	0.5229	0.2698	0.2279	0.3551	0.1923
		0.1342	0.1324	0.1331	0.1386	0.3451	0.2314	0.2631	0.5678	0.1321	0.2793	0.3519	0.4687
		0.1334	0.1323	0.1338	0.135	0.4262	0.3378	0.3555	0.3596	0.414	0.5226	0.4113	0.3328
		0.1367	0.1305	0.1312	0.1348	0.2542	0.2962	0.2892	0.4462	0.2883	0.3468	0.5286	0.4298
12:40:00	37.00	0.1514	0.1365	0.1329	0.1317	0.2361	0.3071	0.503	0.1367	0.1351	0.1398	0.1381	0.1377
		0.1458	0.1375	0.1332	0.138	0.1289	0.4822	0.2907	0.1328	0.1363	0.1344	0.134	0.1352
		0.1568	0.1387	0.1361	0.1318	0.2061	0.2326	0.2234	0.1358	0.1374	0.1398	0.134	0.1381
		0.156	0.1383	0.1381	0.133	0.1894	0.1613	0.5283	0.1338	0.1368	0.1362	0.1428	0.169
		0.1342	0.1316	0.132	0.132	0.1591	0.2278	0.3591	0.5411	0.2814	0.2353	0.3695	0.2027
		0.1338	0.1323	0.1331	0.1387	0.358	0.239	0.2716	0.5844	0.1321	0.2896	0.3573	0.4774
		0.1331	0.1323	0.1339	0.1339	0.4377	0.35	0.368	0.3689	0.4269	0.5466	0.4219	0.3427
		0.1357	0.1304	0.131	0.1335	0.2643	0.307	0.2985	0.4532	0.3013	0.3571	0.558	0.4414
12:50:00	37.00	0.1511	0.136	0.133	0.1328	0.2473	0.3203	0.5252	0.1368	0.1353	0.14	0.1378	0.1369
		0.1475	0.1372	0.1333	0.1388	0.1284	0.4935	0.3009	0.1329	0.1363	0.1343	0.1341	0.1351
		0.1553	0.1383	0.1361	0.1328	0.2141	0.2425	0.2348	0.1357	0.1373	0.1396	0.1337	0.1373
		0.1557	0.1385	0.1377	0.1341	0.1949	0.1642	0.5398	0.1339	0.1372	0.1375	0.1454	0.1766
		0.1339	0.1311	0.1319	0.1334	0.1624	0.236	0.3676	0.56	0.2964	0.2448	0.3851	0.2077
		0.134	0.132	0.133	0.1407	0.3701	0.2496	0.283	0.613	0.1321	0.3058	0.3788	0.5005
		0.1338	0.1322	0.1337	0.1348	0.45	0.3605	0.3846	0.3865	0.4444	0.5747	0.4421	0.3563
		0.137	0.1303	0.1308	0.1344	0.2732	0.3179	0.3122	0.4808	0.312	0.3748	0.572	0.4604
13:00:00	37.00	0.1505	0.1362	0.1327	0.1315	0.2622	0.3299	0.5522	0.1367	0.1352	0.1396	0.1377	0.1403
		0.1466	0.1365	0.1323	0.1374	0.1286	0.5042	0.3142	0.1328	0.1359	0.1343	0.1341	0.135
		0.1552	0.1388	0.1361	0.1317	0.2237	0.2507	0.2477	0.1358	0.1372	0.1396	0.1339	0.1374
		0.1547	0.1386	0.1376	0.1329	0.2042	0.168	0.5697	0.1337	0.1376	0.1394	0.1497	0.1846
		0.1338	0.131	0.1318	0.1325	0.1682	0.2443	0.3854	0.58	0.3082	0.2517	0.3999	0.2192
		0.1336	0.1319	0.1331	0.1413	0.3823	0.2582	0.2945	0.6308	0.1321	0.3159	0.3853	0.5127
		0.1332	0.1319	0.1338	0.1339	0.4619	0.3749	0.4014	0.3994	0.4565	0.5969	0.4568	0.3676
		0.1362	0.1301	0.1307	0.1335	0.2835	0.3308	0.3232	0.4915	0.325	0.3866	0.6016	0.4736
13:10:00	37.00	0.1508	0.136	0.1326	0.1313	0.275	0.3439	0.5768	0.1366	0.1349	0.1394	0.1375	0.1382
		0.1463	0.1375	0.1328	0.1379	0.1286	0.5174	0.3299	0.1327	0.1359	0.1344	0.1339	0.1352
		0.1551	0.1382	0.1359	0.1319	0.2322	0.2621	0.2594	0.1357	0.1373	0.1395	0.1336	0.1372
		0.1555	0.1384	0.1377	0.1328	0.2115	0.1712	0.5796	0.1337	0.1379	0.1414	0.1567	0.194
		0.1348	0.1311	0.1317	0.1326	0.1722	0.2545	0.3965	0.5999	0.3242	0.2622	0.4164	0.2245
		0.1368	0.1318	0.1329	0.1424	0.3947	0.268	0.3068	0.6574	0.1319	0.3315	0.4099	0.5381
		0.1343	0.1318	0.1333	0.1343	0.4751	0.388	0.4212	0.4192	0.4742	0.6263	0.4801	0.383
		0.1371	0.1301	0.1308	0.1333	0.2929	0.3446	0.338	0.5187	0.3362	0.4074	0.6197	0.495
13:20:00	37.00	0.1496	0.1359	0.1326	0.1322	0.2917	0.3542	0.6036	0.1365	0.1347	0.1392	0.1378	0.1366
		0.1443	0.1365	0.1325	0.1386	0.1286	0.5304	0.3465	0.1327	0.1359	0.1345	0.1337	0.135
		0.1541	0.1378	0.1357	0.1327	0.2426	0.2709	0.2729	0.1357	0.137	0.1394	0.1336	0.1373
		0.1543	0.1379	0.1376	0.1338	0.2214	0.1751	0.6108	0.1335	0.1383	0.144	0.1633	0.2
		0.1332	0.1309	0.1317	0.1341	0.1785	0.2645	0.4145	0.6209	0.3373	0.2699	0.4317	0.2369
		0.1333	0.1318	0.1329	0.1459	0.4078	0.2787	0.3173	0.6744	0.1319	0.3444	0.4188	0.5521
		0.1328	0.1317	0.1333	0.1356	0.4883	0.404	0.4399	0.4338	0.4894	0.6486	0.4951	0.3967
		0.136	0.1298	0.1308	0.1343	0.3036	0.3584	0.3492	0.5313	0.3499	0.4214	0.6468	0.511
13:30:00	37.00	0.149	0.1365	0.1326	0.1324	0.3036	0.3676	0.6256	0.1366	0.1346	0.1391	0.1373	0.1368
		0.1458	0.1366	0.1322	0.1384	0.1285	0.5443	0.3613	0.1327	0.1359	0.1338	0.1338	0.1345
		0.1535	0.1377	0.1354	0.1327	0.2525	0.2822	0.284	0.1357	0.1371	0.1395	0.1342	0.137
		0.1544	0.1375	0.1374	0.1339	0.2288	0.1788	0.6205	0.1337	0.139	0.1465	0.1699	0.2068
		0.1333	0.1308	0.1315	0.1342	0.1833	0.275	0.4249	0.6409	0.3543	0.2805	0.448	0.2427
		0.1331	0.1316	0.133	0.1478	0.4202	0.2903	0.332	0.6992	0.1319	0.3599	0.4422	0.5786
		0.1328	0.1317	0.1333	0.1362	0.5026	0.4191	0.4619	0.4561	0.5089	0.6732	0.5203	0.4141
		0.1351	0.1296	0.1306	0.1344	0.313	0.3748	0.3676	0.5616	0.3607	0.4468	0.6621	0.5344
13:40:00	37.00	0.148	0.1354	0.1323	0.1321	0.3218	0.3774	0.6502	0.1365	0.134	0.139	0.137	0.1362
		0.145	0.1361	0.1326	0.1385	0.1286	0.5596	0.3794	0.1328	0.1357	0.134	0.1333	0.1349
		0.1546	0.1375	0.1355	0.1326	0.2636	0.2924	0.2985	0.1355	0.1368	0.1391	0.1336	0.137
		0.1528	0.1376	0.1372	0.1339	0.241	0.1846	0.6505	0.1335	0.1396	0.1496	0.1787	0.2156
		0.1331	0.1305	0.1315	0.1347	0.1896	0.2862	0.4464	0.6608	0.3683	0.2891	0.4647	0.2563
		0.1327	0.1319	0.1329	0.1503	0.434	0.3034	0.3444	0.7125	0.1317	0.373	0.4499	0.5915
		0.1322	0.1317	0.133	0.1367	0.5171	0.4372	0.4821	0.47	0.5243	0.6906	0.5388	0.4296
		0.137	0.1296	0.1306	0.1343	0.3241	0.3917	0.3783	0.5694	0.3762	0.4599	0.688	0.5516
13:50:00	37.00	0.1483	0.1352	0.1323	0.1324	0.3349	0.3918	0.6706	0.1366	0.1341	0.1391	0.1371	0.1362
		0.1446	0.1359	0.1322	0.1382	0.1287	0.5773	0.399	0.1326	0.1356	0.1337	0.1332	0.1345
		0.1543	0.1375	0.1355	0.1326	0.274	0.3032	0.3146	0.1356	0.1368	0.1392	0.1335	0.1369
		0.1527	0.1375	0.1372	0.1338	0.2494	0.1881	0.658	0.1335	0.1407	0.1528	0.1879	0.2235
		0.1328	0.1313	0.1312	0.1348	0.1951	0.299	0.4568	0.6796	0.3866	0.2998	0.4834	0.2621
		0.1328	0.1317	0.1327	0.1523	0.4485	0.3157	0.361	0.7367	0.1318	0.3904	0.4756	0.619
		0.1321	0.1313	0.1331	0.1373	0.5334	0.4556	0.5031	0.4963	0.5459	0.7123	0.5661	0.4488
		0.1353	0.1295	0.1304	0.1344	0.3337	0.408	0.3982	0.5983	0.3894	0.484	0.7009	0.5779
14:00:00	37.00	0.1482	0.1351	0.1324	0.1313	0.3518	0.403	0.6915	0.1364	0.1339	0.1391	0.1367	0.1362
		0.1451	0.1361	0.132	0.137	0.1287	0.5948	0.4199	0.1326	0.1355	0.1337	0.1331	0.1343
		0.1536	0.1375	0.1352	0.1313	0.2866	0.3132	0.3308	0.1354	0.1367	0.139	0.1334	0.1367
		0.1539	0.1375	0.1371	0.1326	0.262	0.1944	0.6855	0.1335	0.1415	0.1566	0.1971	0.2312
		0.1323	0.1304	0.1311	0.1342	0.2027	0.31	0.4766	0.6978	0.3988	0.3087	0.5018	0.276
		0.1325	0.1316	0.1326	0.1551	0.4655	0.3291	0.3753	0.7473	0.1317	0.405	0.4848	0.6303
		0.1322	0.131	0.133	0.137	0.5494	0.477	0.5213	0.5105	0.5579	0.7247	0.5836	0.4626
		0.1347	0.1294	0.1303	0.1333	0.3463	0.424	0.4123	0.6067	0.4029	0.4994	0.7229	0.5968
14:10:00	37.00	0.1475	0.1348	0.1322	0.132	0.3647	0.4188	0.7083	0.1364	0.1342	0.1389	0.1363	0.1361
		0.1445	0.1358	0.1322	0.1381	0.1288	0.6152	0.44	0.1326	0.1355	0.1337	0.1331	0.1344
		0.1516	0.1371	0.1353	0.1325	0.2975	0.3254	0.3478	0.1355	0.1368	0.1386	0.1334	0.1367
		0.1523	0.1372	0.1369	0.1336	0.2712	0.1988	0.6909	0.1335	0.1432	0.1601	0.2061	0.2397
		0.1324	0.1302	0.131	0.1358	0.208	0.3252	0.4864	0.7146	0.4193	0.3207	0.5224	0.2829
		0.1323	0.1315	0.1324	0.1581	0.483	0.3439	0.3947	0.7674	0.1319	0.4228	0.5082	0.655
		0.1317	0.1312	0.1328	0.1395	0.568	0.4964	0.5398	0.5365	0.5838	0.7416	0.6069	0.4792
		0.1344	0.1294	0.1303	0.1345	0.3565	0.4394	0.4304	0.6345	0.4199	0.5236	0.7317	0.6201
14:20:00	37.00	0.1472	0.1346	0.1319	0.1311	0.3822	0.4301	0.7242	0.1362	0.1335	0.1386	0.1368	0.1364
		0.144	0.1356	0.1316	0.137	0.1287	0.6364	0.4605	0.1325	0.1352	0.1338	0.1329	0.1342
		0.1531	0.1371	0.1351	0.1312	0.31	0.3358	0.3662	0.1354	0.1369	0.1387	0.1336	0.1366
		0.1521	0.1369	0.1369	0.1325	0.2856	0.2053	0.716	0.1333	0.1447	0.1637	0.2155	0.2489
		0.1324	0.1304	0.1311	0.1359	0.2171	0.3398	0.5091	0.7304	0.4342	0.3303	0.5424	0.2981
		0.1325	0.1311	0.1326	0.1611	0.5029	0.3603	0.4113	0.776	0.1316	0.4412	0.5146	0.6677
		0.1316	0.1313	0.1327	0.1397	0.5881	0.5185	0.5542	0.5501	0.5972	0.7519	0.6238	0.4929
		0.1347	0.1295	0.1302	0.1331	0.3693	0.4534	0.4449	0.6388	0.4358	0.534	0.7511	0.6349
14:30:00	37.00	0.147	0.1346	0.1318	0.131	0.395	0.4468	0.7371	0.1364	0.1336	0.1387	0.1367	0.136
		0.1434	0.1354	0.1316	0.1366	0.1292	0.6588	0.48	0.1325	0.1353	0.1335	0.1329	0.1341
		0.1521	0.1368	0.1349	0.131	0.3216	0.3486	0.3835	0.1354	0.1363	0.1386	0.1335	0.1365
		0.1515	0.1368	0.1366	0.1322	0.2958	0.2102	0.7212	0.1334	0.1466	0.1677	0.2241	0.2558
		0.1321	0.13	0.131	0.1369	0.2235	0.3557	0.5157	0.7452	0.4544	0.3424	0.5655	0.3046
		0.1321	0.1311	0.1322	0.1634	0.5246	0.3761	0.432	0.7924	0.1315	0.4604	0.5376	0.6907
		0.1317	0.1309	0.1327	0.142	0.6096	0.5386	0.5709	0.5725	0.6187	0.7659	0.6452	0.5099
		0.1343	0.1289	0.1303	0.1335	0.3796	0.4682	0.4619	0.6607	0.4521	0.5571	0.7579	0.6557
14:40:00	37.00	0.1465	0.1341	0.1317	0.1309	0.4108	0.4611	0.7495	0.1363	0.1334	0.1383	0.1368	0.1359
		0.1435	0.1352	0.1314	0.1369	0.1291	0.6833	0.4984	0.1326	0.1351	0.1335	0.1327	0.1339
		0.1519	0.1368	0.1349	0.1311	0.336	0.3608	0.4053	0.1353	0.1366	0.1386	0.134	0.1365
		0.1514	0.1367	0.1369	0.132	0.3097	0.2185	0.7412	0.1333	0.1487	0.1706	0.2338	0.2665
		0.1318	0.1305	0.131	0.1389	0.2329	0.3704	0.5364	0.7593	0.4683	0.3532	0.5871	0.322
		0.1321	0.131	0.1323	0.1686	0.5466	0.3921	0.4474	0.7989	0.1317	0.4792	0.544	0.6997
		0.1316	0.131	0.1325	0.1446	0.6319	0.5593	0.5813	0.5849	0.633	0.7736	0.6587	0.5205
		0.1339	0.1291	0.1301	0.1334	0.3942	0.482	0.4728	0.6666	0.4694	0.5674	0.7752	0.6676
14:50:00	37.00	0.1464	0.1338	0.1316	0.1319	0.42	0.4768	0.7552	0.1363	0.1332	0.1384	0.1363	0.136
		0.1427	0.1351	0.1315	0.1377	0.1294	0.7082	0.5146	0.1325	0.1353	0.1328	0.1323	0.1339
		0.1506	0.1363	0.1348	0.1322	0.3495	0.3732	0.4232	0.1354	0.1362	0.1384	0.134	0.1364
		0.1508	0.1367	0.1364	0.1334	0.3208	0.2252	0.757	0.1332	0.1498	0.1758	0.2434	0.2766
		0.1318	0.1299	0.1309	0.1425	0.2399	0.3874	0.5413	0.7778	0.4762	0.3617	0.609	0.3414
		0.1318	0.131	0.1322	0.1737	0.5691	0.4076	0.4663	0.8087	0.1317	0.4965	0.558	0.6998
		0.1319	0.1306	0.1326	0.1487	0.6563	0.5793	0.5921	0.5977	0.632	0.7808	0.6726	0.533
		0.1342	0.1289	0.1302	0.1347	0.4101	0.4946	0.4856	0.6779	0.4848	0.579	0.7878	0.6831
15:00:00	37.00	0.1462	0.1342	0.1315	0.132	0.44	0.495	0.7729	0.1362	0.1333	0.1385	0.1363	0.1356
		0.1427	0.1352	0.1316	0.1377	0.1301	0.7337	0.5316	0.1324	0.135	0.1331	0.1326	0.1339
		0.1517	0.1364	0.1349	0.1323	0.3628	0.3878	0.4457	0.1352	0.1363	0.1383	0.1345	0.1365
		0.1507	0.1365	0.1367	0.1332	0.3361	0.2324	0.7654	0.1332	0.1549	0.1766	0.253	0.2867
		0.1317	0.1298	0.1308	0.145	0.2494	0.4031	0.5627	0.7842	0.5029	0.3798	0.6297	0.3465
		0.1317	0.131	0.1321	0.1779	0.5921	0.4243	0.4809	0.82	0.1316	0.515	0.5719	0.7307
		0.1319	0.1309	0.1325	0.1524	0.6831	0.5964	0.6056	0.6122	0.6646	0.7912	0.6857	0.5457
		0.1334	0.1288	0.1301	0.1348	0.4225	0.5059	0.5005	0.6893	0.5043	0.5927	0.7946	0.6988
15:10:00	37.00	0.146	0.1339	0.1315	0.1318	0.4506	0.5131	0.7764	0.1361	0.1331	0.1382	0.1362	0.1358
		0.1424	0.1349	0.1313	0.1377	0.1304	0.7575	0.542	0.1325	0.1349	0.1332	0.1325	0.1342
		0.1501	0.1363	0.1347	0.1323	0.3776	0.4029	0.464	0.1352	0.136	0.1383	0.1352	0.1363
		0.1507	0.1363	0.1363	0.1331	0.3479	0.2405	0.7792	0.1331	0.1573	0.1823	0.2642	0.2977
		0.1312	0.1298	0.1307	0.1486	0.2565	0.4175	0.5659	0.8001	0.512	0.3895	0.6493	0.3692
		0.1315	0.131	0.132	0.1827	0.6131	0.4393	0.5001	0.8262	0.1317	0.5325	0.5828	0.7295
		0.1313	0.1306	0.1327	0.1563	0.7104	0.614	0.6133	0.6256	0.6662	0.7974	0.7003	0.5569
		0.1342	0.1289	0.13	0.1348	0.4397	0.5177	0.5089	0.6986	0.5219	0.6008	0.8048	0.7107
15:20:00	37.00	0.1455	0.1339	0.1316	0.1317	0.4696	0.5334	0.7889	0.1361	0.1329	0.1378	0.1358	0.1357
		0.1426	0.1346	0.1317	0.1375	0.1315	0.7779	0.5561	0.1324	0.1346	0.1329	0.1325	0.1335
		0.1523	0.136	0.1346	0.1322	0.3913	0.4189	0.4847	0.1351	0.136	0.1381	0.1366	0.1362
		0.1505	0.136	0.1363	0.133	0.3627	0.2489	0.786	0.1331	0.1625	0.1825	0.274	0.3071
		0.1311	0.1295	0.1307	0.153	0.2659	0.4315	0.5836	0.8055	0.5351	0.4111	0.6691	0.3744
		0.1315	0.1306	0.1319	0.1874	0.6337	0.4557	0.5129	0.8352	0.1317	0.5469	0.5947	0.7596
		0.1311	0.1304	0.1323	0.1604	0.7362	0.6289	0.6242	0.6379	0.6923	0.8056	0.7097	0.5668
		0.1337	0.1289	0.1298	0.135	0.4534	0.5276	0.5201	0.7074	0.5384	0.6173	0.808	0.7229
15:30:00	37.00	0.1448	0.1335	0.1315	0.1318	0.4831	0.5568	0.7979	0.1362	0.133	0.1378	0.1357	0.136
		0.1425	0.1349	0.1316	0.1373	0.1322	0.7991	0.5664	0.1323	0.1344	0.1327	0.1325	0.1337
		0.1496	0.136	0.1342	0.1324	0.4056	0.4377	0.4996	0.1351	0.136	0.1382	0.1392	0.1362
		0.15	0.1361	0.1364	0.1333	0.3737	0.258	0.7864	0.1331	0.1677	0.1866	0.2847	0.3175
		0.1308	0.1293	0.1305	0.1567	0.2733	0.4443	0.5902	0.8149	0.5549	0.43	0.6874	0.3832
		0.1315	0.1307	0.1318	0.19	0.6518	0.4708	0.5272	0.8456	0.132	0.5634	0.6146	0.7817
		0.131	0.131	0.1322	0.1652	0.7618	0.6418	0.6353	0.6525	0.7083	0.8137	0.7234	0.5772
		0.1331	0.1287	0.13	0.1352	0.4691	0.5379	0.5323	0.7233	0.5527	0.6314	0.8103	0.7371
15:40:00	37.00	0.1448	0.1336	0.1312	0.1306	0.499	0.577	0.8057	0.136	0.1325	0.1377	0.136	0.1368
		0.1421	0.1346	0.1313	0.1362	0.1336	0.8168	0.5783	0.1323	0.1345	0.1327	0.1325	0.1335
		0.1498	0.1359	0.1346	0.1315	0.4229	0.456	0.5181	0.135	0.1359	0.1379	0.1418	0.1403
		0.1501	0.1362	0.1362	0.1318	0.3875	0.2674	0.8032	0.133	0.1731	0.1903	0.2971	0.3292
		0.1305	0.1293	0.1305	0.1621	0.2844	0.4569	0.6076	0.8241	0.5677	0.4445	0.7041	0.406
		0.131	0.1304	0.1319	0.1963	0.6698	0.4828	0.5379	0.8485	0.1321	0.5757	0.6144	0.7846
		0.1306	0.1302	0.1322	0.1688	0.7849	0.6561	0.6427	0.6573	0.719	0.8163	0.7287	0.5854
		0.1345	0.1284	0.1297	0.1361	0.4881	0.5469	0.5395	0.7232	0.5706	0.6362	0.8208	0.7431
15:50:00	37.00	0.1448	0.1335	0.1312	0.1315	0.5135	0.6017	0.8092	0.1361	0.1325	0.1379	0.1356	0.1359
		0.1414	0.1344	0.1313	0.1372	0.1346	0.8345	0.5869	0.1322	0.1345	0.1322	0.1323	0.1336
		0.1486	0.1357	0.1343	0.133	0.4382	0.4773	0.5328	0.135	0.1359	0.1379	0.1456	0.1372
		0.1495	0.1384	0.1361	0.1329	0.3993	0.2774	0.8015	0.1331	0.1796	0.196	0.3085	0.3399
		0.1307	0.1292	0.1302	0.1692	0.2923	0.4668	0.608	0.8307	0.5865	0.4635	0.7192	0.4169
		0.131	0.1306	0.1317	0.2001	0.6863	0.4953	0.5529	0.8576	0.1324	0.5892	0.6303	0.8003
		0.1306	0.1303	0.1322	0.1751	0.8072	0.6664	0.6509	0.6701	0.7342	0.8217	0.7414	0.5959
		0.1348	0.1282	0.1298	0.1375	0.5059	0.5532	0.5498	0.7376	0.5842	0.6471	0.821	0.7566
16:00:00	37.00	0.1445	0.133	0.1322	0.1316	0.532	0.6214	0.8157	0.1361	0.1325	0.1375	0.1355	0.1355
		0.1411	0.1344	0.1324	0.137	0.1369	0.8508	0.5943	0.1323	0.1343	0.1327	0.1323	0.1333
		0.1485	0.1357	0.1354	0.1333	0.457	0.4969	0.5454	0.135	0.1358	0.1377	0.1502	0.1365
		0.1492	0.1358	0.1372	0.1327	0.4146	0.2899	0.8174	0.1331	0.1859	0.1985	0.3197	0.3539
		0.1306	0.1293	0.1315	0.178	0.3045	0.4802	0.6216	0.8384	0.5963	0.4773	0.7355	0.437
		0.1311	0.1302	0.133	0.208	0.7033	0.5038	0.5603	0.8582	0.133	0.5987	0.6296	0.8079
		0.1303	0.1301	0.1331	0.18	0.8281	0.6781	0.6542	0.6744	0.7403	0.8224	0.7454	0.6019
		0.1331	0.1286	0.1308	0.136	0.5255	0.5621	0.554	0.7348	0.5984	0.6509	0.8298	0.7603
16:10:00	37.00	0.1445	0.1329	0.131	0.1319	0.5495	0.6452	0.8187	0.136	0.1322	0.1377	0.1354	0.1351
		0.1412	0.1342	0.131	0.1368	0.1388	0.8666	0.6009	0.1321	0.1345	0.1321	0.1321	0.1333
		0.1487	0.1355	0.1341	0.1339	0.4732	0.5174	0.5571	0.1349	0.1357	0.1377	0.1577	0.1373
		0.1491	0.1354	0.1357	0.1328	0.4262	0.3	0.8142	0.133	0.194	0.2028	0.33	0.3659
		0.1305	0.1288	0.1301	0.1843	0.3147	0.4877	0.6233	0.8439	0.6137	0.4951	0.7501	0.4473
		0.1307	0.1303	0.1317	0.2112	0.717	0.5167	0.5744	0.8667	0.1335	0.6123	0.6446	0.8213
		0.1304	0.1299	0.132	0.1857	0.8476	0.6891	0.6618	0.6882	0.7548	0.826	0.754	0.6105
		0.1323	0.1285	0.1298	0.1362	0.5431	0.5685	0.5651	0.7495	0.6103	0.6617	0.8265	0.772
16:20:00	37.00	0.1436	0.1331	0.1309	0.1306	0.5711	0.6655	0.8251	0.1359	0.1321	0.1373	0.1353	0.1353
		0.1408	0.1342	0.1311	0.1356	0.1415	0.8814	0.6088	0.1322	0.1339	0.1324	0.1321	0.1331
		0.1481	0.1356	0.134	0.1336	0.4941	0.5357	0.5679	0.1349	0.1356	0.1376	0.1635	0.1367
		0.1484	0.1354	0.1357	0.1317	0.4421	0.3128	0.8282	0.1329	0.2015	0.2066	0.3418	0.3809
		0.1301	0.1288	0.1301	0.1943	0.3279	0.4982	0.6394	0.8507	0.6229	0.5084	0.7624	0.4683
		0.1305	0.1302	0.1314	0.219	0.7308	0.5266	0.5808	0.8654	0.1341	0.6214	0.6426	0.8243
		0.1303	0.1297	0.1321	0.1902	0.8659	0.6985	0.6654	0.6894	0.7586	0.8257	0.7573	0.6148
		0.1326	0.1281	0.1295	0.1356	0.5652	0.5751	0.568	0.7451	0.6232	0.6631	0.8342	0.7761
16:30:00	37.00	0.144	0.1327	0.1309	0.1321	0.5907	0.6884	0.8269	0.1361	0.1321	0.1373	0.1354	0.1353
		0.1405	0.1339	0.1309	0.1367	0.1435	0.8941	0.6131	0.1322	0.1342	0.1324	0.1319	0.1331
		0.151	0.1351	0.134	0.1355	0.5114	0.5559	0.5747	0.1349	0.1342	0.1377	0.1731	0.1367
		0.1485	0.1353	0.1356	0.1326	0.456	0.3235	0.8253	0.133	0.2105	0.2111	0.3598	0.3939
		0.1299	0.1289	0.1301	0.2015	0.3391	0.5058	0.6362	0.8551	0.6382	0.5238	0.7742	0.4768
		0.1306	0.1301	0.1317	0.2229	0.7455	0.535	0.5903	0.872	0.1336	0.6314	0.6563	0.8382
		0.1299	0.1297	0.1319	0.197	0.8824	0.7079	0.6716	0.7001	0.7708	0.8282	0.7658	0.6229
		0.1332	0.1286	0.1295	0.1372	0.5835	0.5814	0.5747	0.759	0.6338	0.6714	0.8338	0.7847
16:40:00	37.00	0.1442	0.1327	0.1308	0.131	0.6158	0.7056	0.83	0.1359	0.1319	0.1374	0.1353	0.1354
		0.1404	0.1339	0.1307	0.1355	0.147	0.9059	0.6209	0.1321	0.134	0.1322	0.1319	0.1329
		0.1489	0.1353	0.1339	0.1356	0.5341	0.573	0.5813	0.1347	0.1357	0.1375	0.1822	0.1369
		0.1479	0.1352	0.1357	0.1315	0.4735	0.3355	0.8362	0.1328	0.2199	0.2162	0.3754	0.4119
		0.1298	0.1287	0.13	0.2134	0.3566	0.5125	0.6486	0.8594	0.6459	0.5359	0.7842	0.4962
		0.1304	0.1298	0.1316	0.2315	0.758	0.5432	0.5958	0.8707	0.1361	0.6352	0.6523	0.8398
		0.1299	0.1295	0.1317	0.2019	0.898	0.7149	0.6715	0.7008	0.7749	0.8278	0.768	0.6255
		0.1324	0.1281	0.1293	0.1369	0.6045	0.5856	0.577	0.7532	0.6447	0.6724	0.8418	0.7857
16:50:00	37.00	0.1435	0.1326	0.1317	0.1321	0.6386	0.7249	0.8316	0.136	0.1322	0.1371	0.1352	0.1354
		0.1403	0.1335	0.1322	0.1365	0.149	0.9183	0.6215	0.1321	0.134	0.1322	0.1317	0.1331
		0.1477	0.1349	0.1347	0.1382	0.5516	0.5911	0.5894	0.1348	0.1353	0.1373	0.1937	0.137
		0.1485	0.1352	0.1368	0.1325	0.4908	0.3441	0.8315	0.1329	0.2299	0.2213	0.3924	0.4274
		0.1299	0.1287	0.131	0.223	0.3698	0.5197	0.6469	0.8644	0.6608	0.5515	0.7949	0.5041
		0.1302	0.1299	0.1327	0.237	0.7678	0.5529	0.6034	0.877	0.1372	0.6459	0.6671	0.8506
		0.1303	0.1295	0.1328	0.2095	0.9125	0.7207	0.6782	0.7108	0.785	0.8295	0.775	0.6323
		0.1323	0.1279	0.1306	0.1386	0.6205	0.5892	0.5841	0.7668	0.653	0.6795	0.8365	0.7952
17:00:00	37.00	0.1434	0.1323	0.1305	0.1323	0.6673	0.7401	0.8351	0.1359	0.1318	0.1369	0.1347	0.1357
		0.1402	0.1337	0.1308	0.1366	0.1528	0.9287	0.6278	0.1321	0.1337	0.1321	0.1319	0.1328
		0.1471	0.1358	0.1336	0.1412	0.5751	0.6047	0.5955	0.1347	0.2353	0.2374	0.2034	0.2373
		0.2472	0.135	0.1355	0.1325	0.5118	0.3576	0.8427	0.1327	0.4389	0.4471	0.4111	0.4465
		0.1295	0.1285	0.1298	0.2379	0.3871	0.5254	0.6594	0.8675	0.6666	0.5607	0.8034	0.5239
		0.1299	0.1297	0.1315	0.2472	0.7789	0.5565	0.6064	0.8746	0.139	0.6503	0.6616	0.8516
		0.1305	0.1293	0.1317	0.2155	0.9254	0.7279	0.6787	0.708	0.787	0.8281	0.7745	0.6358
		0.1318	0.1281	0.1292	0.1395	0.6411	0.5943	0.586	0.7603	0.6608	0.681	0.8443	0.7932
17:10:00	37.00	0.1431	0.1325	0.1307	0.1329	0.6915	0.7581	0.8367	0.1359	0.1316	0.1373	0.1347	0.1352
		0.1403	0.1334	0.1305	0.1366	0.1552	0.9373	0.6316	0.1321	0.134	0.132	0.1318	0.1329
		0.1471	0.1352	0.1338	0.1434	0.5923	0.6224	0.5991	0.1347	0.2353	0.2374	0.2171	0.238
		0.1473	0.1349	0.1354	0.1324	0.5307	0.3653	0.837	0.1329	0.4508	0.4344	0.4345	0.4655
		0.1297	0.1282	0.1298	0.2464	0.4003	0.5305	0.6585	0.8695	0.6787	0.5754	0.8108	0.5301
		0.1298	0.1296	0.1316	0.2516	0.7873	0.5631	0.6161	0.8809	0.1411	0.658	0.6725	0.8596
		0.1296	0.1294	0.1315	0.2227	0.9377	0.7307	0.6816	0.7159	0.7959	0.8303	0.7791	0.6407
		0.1321	0.128	0.1294	0.1401	0.6563	0.5972	0.5928	0.7705	0.6688	0.6888	0.8401	0.8023
17:20:00	37.00	0.1431	0.132	0.1304	0.133	0.7197	0.7693	0.8385	0.1357	0.1312	0.1367	0.1346	0.135
		0.1395	0.1335	0.1304	0.1364	0.1596	0.9458	0.6349	0.1321	0.1336	0.1317	0.1314	0.1328
		0.1474	0.135	0.1336	0.1478	0.6142	0.634	0.6048	0.1346	0.2352	0.2372	0.2282	0.2388
		0.1471	0.1347	0.1354	0.1325	0.5548	0.3768	0.8478	0.1326	0.461	0.4417	0.4549	0.4902
		0.1293	0.1288	0.1297	0.2648	0.416	0.5369	0.6657	0.8723	0.6834	0.5844	0.818	0.5463
		0.1303	0.1298	0.1319	0.2634	0.7964	0.5669	0.6162	0.8778	0.1427	0.6599	0.669	0.8613
		0.1295	0.1292	0.1316	0.2291	0.9487	0.7358	0.6832	0.7133	0.7968	0.8281	0.7797	0.643
		0.1319	0.1278	0.1293	0.1414	0.6747	0.6005	0.5909	0.7637	0.6759	0.6858	0.8461	0.8003
17:30:00	37.00	0.1631	0.1324	0.1304	0.134	0.745	0.7867	0.839	0.1358	0.1315	0.1369	0.1347	0.1353
		0.1393	0.1332	0.1302	0.1365	0.162	0.9534	0.6363	0.132	0.1335	0.1318	0.1313	0.1327
		0.1466	0.1349	0.1336	0.1513	0.6312	0.6478	0.608	0.1346	0.2352	0.2372	0.2446	0.2393
		0.1472	0.1347	0.1353	0.1326	0.5777	0.3856	0.8412	0.1327	0.4738	0.4492	0.483	0.5134
		0.1292	0.1283	0.1297	0.2737	0.427	0.5403	0.6636	0.874	0.6955	0.5956	0.8253	0.5529
		0.1298	0.1294	0.1318	0.2676	0.8022	0.5727	0.624	0.8833	0.1453	0.6651	0.6789	0.8678
		0.1296	0.1294	0.1316	0.2367	0.9583	0.7367	0.6863	0.7226	0.8056	0.8286	0.7843	0.6478
		0.1316	0.1276	0.1291	0.1427	0.6881	0.6022	0.5975	0.7746	0.6822	0.6914	0.8405	0.8083
17:40:00	37.00	0.1427	0.1323	0.1303	0.1344	0.7736	0.7975	0.8411	0.1357	0.1313	0.1367	0.1348	0.1354
		0.1397	0.133	0.1304	0.1363	0.1674	0.9596	0.639	0.132	0.1334	0.1318	0.131	0.1323
		0.1469	0.1346	0.1333	0.1575	0.6521	0.6602	0.6129	0.1347	0.2353	0.2369	0.2545	0.2427
		0.1466	0.1346	0.1351	0.1325	0.6062	0.3961	0.8502	0.1326	0.5843	0.2572	0.5064	0.5397
		0.1291	0.1281	0.1296	0.2937	0.4429	0.5448	0.6742	0.8761	0.6964	0.6027	0.8311	0.5692
		0.1296	0.1294	0.1325	0.2798	0.8098	0.5769	0.6258	0.8805	0.1472	0.6691	0.6732	0.8683
		0.1296	0.1293	0.1314	0.2431	0.967	0.7409	0.6851	0.7196	0.8048	0.8268	0.7821	0.6481
		0.1318	0.1278	0.1292	0.1441	0.7038	0.6041	0.5968	0.7676	0.687	0.6887	0.8455	0.8079
17:50:00	37.00	0.1429	0.132	0.1304	0.1356	0.7968	0.8098	0.841	0.1358	0.1308	0.1363	0.1343	0.135
		0.1393	0.133	0.1303	0.1361	0.1697	0.9659	0.6403	0.1319	0.1334	0.1312	0.1311	0.1325
		0.1468	0.1359	0.1334	0.1633	0.6681	0.6727	0.6142	0.1346	0.2352	0.2369	0.2719	0.2427
		0.1463	0.1343	0.1352	0.1323	0.6293	0.4026	0.8436	0.1327	0.5971	0.5667	0.5369	0.5616
		0.129	0.1285	0.1294	0.304	0.4522	0.5488	0.6701	0.8779	0.7038	0.6127	0.8365	0.5709
		0.1294	0.1293	0.1326	0.2846	0.8149	0.5815	0.6308	0.8852	0.1499	0.6718	0.6832	0.8771
		0.1292	0.1289	0.1313	0.2512	0.9752	0.7425	0.6876	0.7252	0.808	0.8283	0.7871	0.6508
		0.1317	0.1279	0.1291	0.1454	0.7146	0.606	0.6011	0.7782	0.6885	0.6945	0.8433	0.8132
18:00:00	37.00	0.1425	0.1322	0.1299	0.1362	0.8224	0.8166	0.8426	0.1357	0.1312	0.1364	0.1345	0.1352
		0.1395	0.1331	0.13	0.1364	0.1757	0.9715	0.6415	0.1319	0.1333	0.1314	0.1308	0.1325
		0.1459	0.1345	0.1332	0.1714	0.687	0.681	0.6175	0.1345	0.3349	0.3367	0.2878	0.343
		0.1467	0.1343	0.1352	0.1322	0.6574	0.4129	0.8524	0.1326	0.509	0.5754	0.5625	0.5888
		0.1289	0.1279	0.1294	0.3261	0.4672	0.5513	0.6764	0.8796	0.7084	0.6193	0.8411	0.5871
		0.1295	0.1294	0.1338	0.2974	0.8203	0.5843	0.6301	0.8816	0.1525	0.6742	0.6797	0.8745
		0.1291	0.1289	0.1312	0.2589	0.9824	0.7448	0.6866	0.7216	0.8095	0.8242	0.7848	0.6509
		0.1309	0.1276	0.129	0.1475	0.7285	0.608	0.6003	0.77	0.6949	0.6919	0.8477	0.81
18:10:00	37.00	0.1423	0.132	0.1301	0.1384	0.8416	0.8277	0.8414	0.1358	0.1311	0.1363	0.1343	0.1351
		0.1387	0.133	0.1299	0.136	0.1774	0.9758	0.6426	0.1319	0.1336	0.131	0.131	0.1324
		0.1461	0.1344	0.1332	0.1791	0.7006	0.6919	0.6192	0.1346	0.3349	0.3368	0.3101	0.3455
		0.1461	0.1342	0.135	0.1323	0.6831	0.4184	0.844	0.1326	0.522	0.5836	0.5873	0.6108
		0.1289	0.1279	0.1292	0.3384	0.4749	0.553	0.673	0.8809	0.7173	0.6278	0.8457	0.5885
		0.1294	0.1295	0.1345	0.3047	0.8238	0.5879	0.6346	0.8865	0.1559	0.6779	0.6875	0.8806
		0.1292	0.1311	0.1312	0.2666	0.9886	0.7456	0.6887	0.7275	0.8161	0.8241	0.7888	0.6544
		0.1318	0.1274	0.1292	0.1495	0.7393	0.6086	0.6028	0.7798	0.698	0.6969	0.8393	0.8157
18:20:00	37.00	0.1419	0.1319	0.1301	0.1397	0.8653	0.8345	0.8441	0.1357	0.131	0.1362	0.1342	0.1352
		0.1388	0.1328	0.1302	0.1361	0.1841	0.9806	0.6438	0.1319	0.1333	0.1313	0.131	0.1323
		0.1456	0.1344	0.1335	0.1896	0.7167	0.7005	0.6222	0.1345	0.3347	0.3367	0.3251	0.1513
		0.1457	0.1344	0.1352	0.132	0.7083	0.4282	0.8527	0.1325	0.6645	0.6931	0.6104	0.632
		0.1284	0.1277	0.1294	0.3621	0.4883	0.5552	0.68	0.8814	0.7186	0.633	0.8488	0.6008
		0.1293	0.1292	0.1363	0.3188	0.8286	0.5876	0.6338	0.8825	0.1588	0.678	0.6804	0.8788
		0.129	0.1287	0.1312	0.2745	0.9935	0.7479	0.6879	0.7238	0.8138	0.8219	0.7869	0.6549
		0.1312	0.1272	0.1291	0.1528	0.7507	0.611	0.6012	0.7718	0.7021	0.6931	0.8483	0.8136
18:30:00	37.00	0.1425	0.1317	0.1311	0.143	0.8825	0.845	0.8432	0.1356	0.1309	0.1362	0.134	0.1351
		0.1384	0.133	0.1299	0.1361	0.1869	0.9837	0.6429	0.1319	0.1332	0.1312	0.131	0.1322
		0.1453	0.1353	0.133	0.1984	0.7275	0.707	0.6219	0.1344	0.1346	0.1366	0.3485	0.1532
		0.1454	0.1339	0.1346	0.1321	0.729	0.4323	0.846	0.1326	0.6488	0.6022	0.6316	0.6503
		0.1283	0.1276	0.1293	0.3731	0.4956	0.5575	0.6751	0.8822	0.7259	0.6417	0.8527	0.6023
		0.1294	0.129	0.1371	0.3257	0.8321	0.5893	0.6377	0.8871	0.1621	0.6807	0.689	0.8854
		0.1289	0.1287	0.1311	0.2828	0.9984	0.7473	0.6911	0.7301	0.8197	0.8212	0.7904	0.6574
		0.131	0.1273	0.129	0.1549	0.7578	0.6111	0.6036	0.7795	0.7043	0.7002	0.8422	0.8158
18:40:00	37.00	0.1597	0.1316	0.1311	0.1451	0.9026	0.8504	0.8448	0.1356	0.1309	0.1361	0.1343	0.1364
		0.1386	0.1327	0.131	0.136	0.1942	0.9869	0.6447	0.1318	0.1331	0.1315	0.1307	0.1323
		0.1451	0.1344	0.1341	0.2117	0.7427	0.7138	0.6245	0.1343	0.3347	0.3366	0.3625	0.3573
		0.1458	0.1337	0.136	0.132	0.7533	0.4408	0.8541	0.1325	0.3609	0.3122	0.6509	0.6685
		0.1284	0.1275	0.1305	0.3999	0.5069	0.5583	0.6811	0.8828	0.7274	0.646	0.8548	0.6143
		0.1295	0.1307	0.1404	0.3433	0.8354	0.5898	0.6364	0.8831	0.1664	0.6809	0.6836	0.8837
		0.1286	0.1284	0.1319	0.2924	0.8354	0.7495	0.6889	0.7251	0.8171	0.817	0.7882	0.6573
		0.1308	0.1272	0.1302	0.1591	0.769	0.6125	0.6031	0.7714	0.7066	0.6931	0.8452	0.8156
18:50:00	37.00	0.1415	0.1312	0.1299	0.15	0.9165	0.8586	0.844	0.1356	0.1309	0.1361	0.1341	0.1361
		0.1382	0.1326	0.1298	0.136	0.1971	0.9896	0.644	0.1319	0.1332	0.1309	0.1305	0.1321
		0.1449	0.134	0.133	0.2233	0.7505	0.7196	0.6255	0.1344	0.3345	0.3366	0.3876	0.3598
		0.1459	0.1338	0.1348	0.1321	0.772	0.444	0.8456	0.1325	0.3762	0.3237	0.6671	0.6847
		0.1284	0.1276	0.129	0.4151	0.5134	0.5603	0.6775	0.8831	0.7354	0.6514	0.858	0.6135
		0.1289	0.1292	0.1411	0.3514	0.8371	0.5922	0.6391	0.887	0.1689	0.6848	0.6907	0.8889
		0.1293	0.1287	0.131	0.3021	0.8371	0.7491	0.6908	0.7301	0.821	0.8165	0.7911	0.6586
		0.1309	0.1271	0.1291	0.1622	0.7755	0.6126	0.6063	0.7809	0.7058	0.6997	0.8426	0.8188
19:00:00	37.00	0.1415	0.1316	0.1297	0.153	0.9332	0.8616	0.8448	0.1356	0.1305	0.1358	0.1342	0.1384
		0.1377	0.1325	0.1297	0.1361	0.205	0.9917	0.6454	0.1318	0.133	0.131	0.1306	0.1321
		0.1459	0.1339	0.1329	0.238	0.7626	0.7233	0.6269	0.1343	0.3345	0.3363	0.4036	0.3672
		0.1454	0.1336	0.1347	0.1318	0.7912	0.4525	0.8534	0.1324	0.3902	0.3328	0.6807	0.7
		0.1279	0.1277	0.1292	0.4445	0.5242	0.56	0.684	0.8845	0.734	0.6548	0.8592	0.6242
		0.1289	0.1289	0.1435	0.3685	0.8402	0.5926	0.6387	0.8829	0.1725	0.6824	0.6812	0.8859
		0.1285	0.1284	0.1309	0.3121	0.8402	0.7504	0.6884	0.7245	0.8187	0.8123	0.7879	0.6586
		0.133	0.1272	0.1291	0.1675	0.7849	0.6144	0.603	0.7741	0.7098	0.6943	0.8466	0.8157
19:10:00	37.00	0.1413	0.1313	0.1298	0.1579	0.944	0.8687	0.8441	0.1356	0.1307	0.1361	0.1341	0.1362
		0.1376	0.1324	0.1296	0.1349	0.2071	0.9943	0.6441	0.1317	0.133	0.1306	0.1306	0.1319
		0.1445	0.134	0.1328	0.2493	0.7677	0.7295	0.6267	0.1343	0.3344	0.3364	0.4304	0.372
		0.1449	0.1335	0.1346	0.1307	0.8064	0.4542	0.8456	0.1325	0.4066	0.3419	0.6955	0.7141
		0.1282	0.1276	0.1292	0.4571	0.5291	0.562	0.6804	0.8852	0.7383	0.6591	0.861	0.6224
		0.1289	0.1291	0.1456	0.3765	0.8408	0.5953	0.6409	0.8864	0.1762	0.6842	0.6906	0.8911
		0.1281	0.1283	0.1309	0.3234	0.8408	0.7499	0.6901	0.7284	0.8231	0.8121	0.791	0.6599
		0.1303	0.1271	0.1291	0.1702	0.7897	0.6136	0.6055	0.7813	0.711	0.6989	0.839	0.8213
19:20:00	37.00	0.141	0.1308	0.1308	0.1626	0.9584	0.8714	0.8442	0.1356	0.1302	0.1359	0.1343	0.1377
		0.1377	0.1323	0.131	0.1363	0.2163	0.9969	0.6452	0.1318	0.1329	0.131	0.1303	0.132
		0.1446	0.134	0.1339	0.2647	0.7768	0.7327	0.6284	0.1343	0.3348	0.3363	0.4481	0.3805
		0.1445	0.1338	0.1355	0.1319	0.8238	0.4622	0.8541	0.1324	0.4214	0.3509	0.7091	0.7277
		0.128	0.1273	0.1302	0.4869	0.5378	0.5624	0.6858	0.8853	0.737	0.6616	0.8621	0.6333
		0.1288	0.1286	0.1495	0.3944	0.8434	0.5927	0.6391	0.8818	0.1803	0.6847	0.6819	0.8881
		0.1283	0.1284	0.1321	0.3365	0.8434	0.7515	0.6885	0.7234	0.8199	0.8074	0.7871	0.6589
		0.1306	0.1269	0.1303	0.1774	0.7971	0.6137	0.6011	0.772	0.7122	0.6952	0.846	0.8175
19:30:00	37.00	0.1415	0.1309	0.1297	0.1702	0.9678	0.8776	0.8429	0.1355	0.1304	0.1359	0.1336	0.137
		0.1377	0.1321	0.1294	0.1361	0.2189	0.9979	0.6449	0.1317	0.1329	0.1305	0.1306	0.1318
		0.1445	0.134	0.1329	0.2761	0.7809	0.7357	0.6276	0.1343	0.3344	0.336	0.3793	0.3855
		0.1449	0.1336	0.1344	0.1319	0.836	0.4636	0.8455	0.1325	0.7223	0.7223	0.7223	0.7364
		0.1278	0.1273	0.1293	0.5031	0.5426	0.5633	0.6811	0.8856	0.744	0.667	0.8647	0.6303
		0.1286	0.1288	0.1511	0.4028	0.8445	0.5941	0.6416	0.8852	0.1844	0.6849	0.6903	0.8935
		0.1284	0.1283	0.1307	0.3502	0.8445	0.7496	0.6896	0.7282	0.8229	0.8082	0.7906	0.6607
		0.1304	0.127	0.1293	0.182	0.8004	0.6136	0.6073	0.7804	0.712	0.6993	0.8393	0.8204
19:40:00	37.00	0.1407	0.1309	0.1298	0.1768	0.9818	0.8814	0.8431	0.1353	0.1304	0.1357	0.1338	0.1352
		0.1374	0.132	0.1296	0.1362	0.2291	0.9988	0.6445	0.1317	0.1328	0.1308	0.1307	0.1319
		0.144	0.1336	0.1326	0.2898	0.7858	0.7403	0.6278	0.1342	0.1344	0.136	0.5108	0.1926
		0.1451	0.1332	0.1345	0.1319	0.8488	0.4687	0.8314	0.1327	0.7321	0.7321	0.7321	0.7442
		0.1275	0.1271	0.1291	0.5373	0.5503	0.5638	0.6772	0.8847	0.7541	0.6689	0.865	0.6334
		0.129	0.1286	0.153	0.4197	0.8456	0.595	0.6448	0.8845	0.1877	0.687	0.6917	0.893
		0.1282	0.1282	0.1306	0.3645	0.8456	0.7493	0.6948	0.7266	0.8334	0.8065	0.7898	0.6618
		0.1305	0.1269	0.1292	0.1909	0.8009	0.6132	0.6113	0.7765	0.7129	0.7011	0.834	0.822
19:50:00	37.00	0.1409	0.1309	0.1295	0.1834	0.9873	0.8856	0.8422	0.1355	0.1301	0.1354	0.1336	0.1379
		0.1376	0.1323	0.1293	0.1362	0.2303	0.8856	0.6443	0.1318	0.1326	0.1306	0.1304	0.1318
		0.1452	0.1338	0.1326	0.303	0.7915	0.7418	0.628	0.1343	0.3342	0.336	0.3348	0.3011
		0.1443	0.1333	0.1344	0.132	0.8592	0.4726	0.8453	0.1328	0.7394	0.7394	0.7394	0.7536
		0.1276	0.127	0.1292	0.5527	0.5536	0.5632	0.6838	0.886	0.7479	0.6721	0.8657	0.6372
		0.1283	0.1285	0.1563	0.4282	0.8469	0.5952	0.6418	0.8851	0.1914	0.6859	0.6902	0.8938
		0.1281	0.128	0.1305	0.4282	0.8469	0.7507	0.6888	0.7282	0.8255	0.8038	0.7896	0.6614
		0.1301	0.1266	0.1295	0.4282	0.8085	0.6135	0.6049	0.7815	0.7132	0.6993	0.8376	0.8206
20:00:00	37.00	0.1407	0.1308	0.1305	0.1888	0.9975	0.8865	0.842	0.1354	0.13	0.1355	0.1338	0.136
		0.1373	0.1321	0.1306	0.1363	0.2385	0.8865	0.644	0.1317	0.1325	0.1307	0.1303	0.1318
		0.1442	0.1335	0.1336	0.3175	0.7993	0.7428	0.6307	0.1341	0.3342	0.336	0.3519	0.3084
		0.1445	0.1331	0.1355	0.1318	0.8708	0.4765	0.8527	0.1327	0.7431	0.7431	0.7431	0.7615
		0.1274	0.1269	0.1304	0.5885	0.5611	0.5639	0.6901	0.8868	0.7469	0.6725	0.8669	0.6455
		0.1286	0.1286	0.1622	0.446	0.8483	0.5954	0.6386	0.8802	0.1948	0.685	0.6815	0.8897
		0.1279	0.1279	0.1319	0.446	0.8483	0.7517	0.6878	0.7227	0.822	0.7989	0.7851	0.6602
		0.1304	0.1269	0.1309	0.446	0.8146	0.6134	0.6023	0.7737	0.7157	0.693	0.8428	0.8176
20:10:00	37.00	0.1408	0.1308	0.1305	0.1989	0.241	0.9051	0.841	0.1355	0.1301	0.1355	0.1334	0.1371
		0.1373	0.1318	0.1306	0.1366	0.241	0.9051	0.6433	0.1317	0.1326	0.1307	0.1301	0.1317
		0.1448	0.1334	0.1336	0.3287	0.8005	0.7463	0.6292	0.1341	0.3343	0.3359	0.39	0.3132
		0.1437	0.133	0.1357	0.1319	0.8785	0.4774	0.8452	0.1326	0.7506	0.7506	0.7506	0.7658
		0.1275	0.1269	0.1304	0.6048	0.563	0.5648	0.6862	0.8868	0.7511	0.676	0.8681	0.6417
		0.1282	0.1285	0.1633	0.4508	0.8471	0.5976	0.6412	0.8835	0.1987	0.6871	0.6884	0.8944
		0.128	0.1279	0.132	0.4508	0.8471	0.75	0.6881	0.7272	0.825	0.799	0.7874	0.6617
		0.1299	0.1268	0.1314	0.4508	0.8155	0.6132	0.6047	0.7826	0.7137	0.6975	0.834	0.8198
20:20:00	37.00	0.1413	0.1306	0.1292	0.2051	0.2503	0.9028	0.8417	0.1354	0.13	0.1352	0.1333	0.1361
		0.1379	0.1317	0.1297	0.1366	0.2503	0.9028	0.6433	0.1318	0.1324	0.1307	0.1298	0.1315
		0.145	0.1334	0.1325	0.3419	0.8068	0.7466	0.6305	0.1341	0.3344	0.3359	0.6139	0.2208
		0.1454	0.1332	0.1339	0.1318	0.887	0.4832	0.8523	0.1327	0.7541	0.7541	0.7541	0.7722
		0.1284	0.1271	0.129	0.64	0.5696	0.5655	0.6916	0.8861	0.7492	0.6762	0.868	0.65
		0.1293	0.1281	0.1662	0.4673	0.8493	0.5961	0.6393	0.8791	0.2026	0.6854	0.6801	0.8894
		0.1289	0.1279	0.1306	0.4271	0.8493	0.7514	0.6855	0.7218	0.8222	0.7955	0.7837	0.66
		0.1313	0.1267	0.1305	0.4271	0.8202	0.6128	0.6004	0.7721	0.7166	0.6916	0.8413	0.8165
20:30:00	37.00	0.1402	0.1308	0.1291	0.2119	0.2496	0.9062	0.8356	0.1353	0.1297	0.1352	0.1335	0.1346
		0.1367	0.1316	0.1292	0.1368	0.2496	0.9062	0.6419	0.1317	0.1324	0.1302	0.13	0.1315
		0.1443	0.1333	0.1318	0.3545	0.8109	0.7472	0.6286	0.1341	0.3349	0.3358	0.3354	0.2271
		0.1438	0.1331	0.1341	0.1318	0.8937	0.4835	0.8522	0.1326	0.7324	0.7324	0.7585	0.7771
		0.127	0.1268	0.1292	0.6634	0.5718	0.5657	0.6835	0.8908	0.743	0.6708	0.8676	0.6611
		0.1281	0.1282	0.1737	0.4791	0.8488	0.5964	0.6405	0.8771	0.2053	0.6841	0.6797	0.8767
		0.128	0.1278	0.1306	0.4428	0.8488	0.75	0.6831	0.7197	0.8092	0.7917	0.7843	0.6592
		0.1303	0.1267	0.1313	0.4428	0.8265	0.6122	0.5986	0.7728	0.7159	0.6877	0.8425	0.817
20:40:00	37.00	0.1404	0.1305	0.1292	0.2235	0.2594	0.909	0.8398	0.1352	0.1296	0.135	0.1333	0.1344
		0.1367	0.1318	0.129	0.1369	0.2594	0.909	0.6429	0.1316	0.1325	0.1307	0.1298	0.1314
		0.1437	0.1333	0.1323	0.3652	0.8127	0.7497	0.6294	0.1339	0.3352	0.3358	0.3796	0.3348
		0.144	0.133	0.1339	0.1318	0.8993	0.7497	0.8498	0.1326	0.7586	0.7586	0.7586	0.7803
		0.1273	0.1268	0.1293	0.6919	0.576	0.5658	0.6914	0.8859	0.7532	0.678	0.8682	0.6532
		0.1281	0.1283	0.1747	0.4868	0.8497	0.5968	0.6392	0.8776	0.2095	0.6845	0.6817	0.8906
		0.1277	0.1277	0.1308	0.4558	0.8497	0.7501	0.6837	0.7193	0.8219	0.7922	0.7828	0.6592
		0.1299	0.1265	0.1323	0.4558	0.8242	0.612	0.6	0.7689	0.716	0.6909	0.8365	0.8156
20:50:00	37.00	0.1404	0.1304	0.1292	0.2342	0.2605	0.9138	0.8383	0.1353	0.1296	0.135	0.1331	0.1342
		0.1365	0.1311	0.1293	0.1373	0.2605	0.9138	0.6405	0.1317	0.1322	0.1305	0.1301	0.1315
		0.1438	0.1333	0.1321	0.3748	0.813	0.7514	0.6288	0.134	0.3345	0.336	0.3213	0.3434
		0.1437	0.1328	0.1339	0.1319	0.903	0.7514	0.8396	0.1326	0.7608	0.7608	0.7608	0.7829
		0.1269	0.1267	0.1292	0.708	0.5764	0.5662	0.6855	0.8852	0.7562	0.6816	0.8684	0.6478
		0.128	0.1282	0.1772	0.4913	0.8497	0.5972	0.6409	0.8812	0.6844	0.6844	0.6864	0.8943
		0.1274	0.1278	0.131	0.4686	0.8497	0.7493	0.686	0.7236	0.8254	0.7922	0.7847	0.6612
		0.1297	0.1264	0.1331	0.4686	0.8231	0.6109	0.6024	0.7787	0.7138	0.6941	0.8316	0.8201
21:00:00	37.00	0.1402	0.1304	0.129	0.2398	0.2694	0.9136	0.8383	0.1352	0.1295	0.1351	0.1333	0.1347
		0.1363	0.1312	0.129	0.1374	0.2694	0.9136	0.6414	0.1317	0.1322	0.1303	0.1297	0.1313
		0.1437	0.1334	0.1322	0.3858	0.8171	0.7512	0.6288	0.1339	0.3346	0.336	0.3505	0.2525
		0.1435	0.1327	0.1337	0.1319	0.9077	0.4895	0.8486	0.1326	0.7621	0.7621	0.7621	0.7847
		0.1269	0.1267	0.1292	0.7478	0.5808	0.5663	0.6905	0.8856	0.7519	0.68	0.869	0.6538
		0.1281	0.1283	0.1822	0.5062	0.8499	0.5962	0.6388	0.8766	0.6845	0.6845	0.6795	0.8904
		0.1278	0.1276	0.131	0.4816	0.8499	0.7488	0.6822	0.7181	0.8212	0.7887	0.7811	0.6597
		0.1296	0.1265	0.1349	0.6548	0.8268	0.611	0.6	0.7709	0.715	0.6888	0.837	0.8131
21:10:00	37.00	0.1515	0.13	0.1292	0.2523	0.2698	0.9172	0.8373	0.1353	0.1295	0.1352	0.133	0.1345
		0.1364	0.1314	0.1291	0.1376	0.2698	0.9172	0.6397	0.1316	0.1322	0.1301	0.1298	0.1313
		0.1432	0.133	0.1319	0.3947	0.817	0.7515	0.6269	0.134	0.335	0.3363	0.3958	0.2598
		0.1437	0.1328	0.1338	0.1323	0.9112	0.489	0.8388	0.1327	0.7664	0.7664	0.7664	0.7855
		0.1269	0.1266	0.1291	0.7607	0.5799	0.5653	0.6863	0.8849	0.7583	0.6825	0.8679	0.6483
		0.128	0.1281	0.1864	0.5086	0.8494	0.5974	0.6413	0.8805	0.6843	0.6843	0.6864	0.894
		0.1274	0.1275	0.1313	0.4939	0.8494	0.7475	0.6848	0.7227	0.8239	0.7889	0.7832	0.6594
		0.1301	0.1264	0.1369	0.6619	0.8271	0.6104	0.6017	0.7789	0.7138	0.6923	0.8314	0.8178
21:20:00	37.00	0.1398	0.1305	0.1302	0.259	0.2771	0.9172	0.8377	0.1352	0.1294	0.1348	0.1332	0.1346
		0.1361	0.1315	0.1306	0.1378	0.2771	0.9172	0.6405	0.1316	0.1324	0.1299	0.1298	0.131
		0.143	0.1331	0.1333	0.4039	0.8205	0.7513	0.6271	0.1338	0.3356	0.3364	0.3232	0.2695
		0.1434	0.1327	0.1348	0.1323	0.914	0.4927	0.8469	0.1324	0.7642	0.7642	0.7642	0.7867
		0.1266	0.1267	0.1305	0.798	0.5844	0.5649	0.6916	0.8847	0.7537	0.6815	0.8679	0.6545
		0.1281	0.128	0.1951	0.5235	0.8503	0.595	0.6374	0.8753	0.6828	0.6828	0.6788	0.8909
		0.1273	0.1272	0.1327	0.5041	0.8503	0.7478	0.6813	0.7166	0.8198	0.7847	0.7799	0.6581
		0.1297	0.1264	0.1409	0.6743	0.8301	0.6095	0.5985	0.7698	0.7143	0.6872	0.8343	0.8117
21:30:00	37.00	0.1399	0.131	0.1288	0.2666	0.2747	0.9197	0.831	0.1352	0.1293	0.1347	0.1331	0.135
		0.1359	0.1322	0.1289	0.1381	0.2747	0.9197	0.6382	0.1316	0.132	0.13	0.1294	0.131
		0.143	0.1342	0.132	0.4119	0.823	0.7527	0.6244	0.134	0.3354	0.3364	0.3547	0.2796
		0.1447	0.1337	0.1335	0.1313	0.9171	0.4925	0.8489	0.1325	0.6061	0.7673	0.7673	0.7892
		0.1265	0.1278	0.1294	0.8241	0.5841	0.5651	0.6831	0.888	0.7473	0.6763	0.868	0.6644
		0.1278	0.1291	0.2002	0.5335	0.8485	0.5957	0.639	0.873	0.6821	0.6821	0.6758	0.8767
		0.1274	0.1286	0.1317	0.5141	0.8485	0.7465	0.678	0.7144	0.8062	0.7806	0.7796	0.6572
		0.1295	0.1275	0.1436	0.6838	0.8367	0.6096	0.5954	0.7701	0.7122	0.683	0.8376	0.8123
21:40:00	37.00	0.1395	0.1303	0.1288	0.2801	0.2861	0.9193	0.8368	0.135	0.1293	0.1347	0.1328	0.1347
		0.1361	0.1312	0.129	0.1385	0.2861	0.9193	0.6386	0.1315	0.132	0.1297	0.1296	0.1309
		0.1426	0.133	0.1312	0.4204	0.8235	0.7518	0.6257	0.1338	0.3357	0.337	0.3015	0.289
		0.143	0.1326	0.1334	0.133	0.9184	0.4942	0.8453	0.1324	0.6208	0.7664	0.7664	0.7891
		0.1263	0.1265	0.1293	0.8452	0.5874	0.5638	0.6915	0.8826	0.7545	0.6828	0.8682	0.6565
		0.1279	0.128	0.2038	0.5365	0.8485	0.5948	0.636	0.8743	0.6811	0.6811	0.6769	0.8894
		0.1273	0.1273	0.1324	0.5236	0.8485	0.7464	0.6798	0.7146	0.8182	0.7822	0.7785	0.6564
		0.1291	0.1262	0.1472	0.6951	0.8337	0.6087	0.5974	0.7683	0.7133	0.6865	0.8333	0.8114
21:50:00	37.00	0.1435	0.1299	0.1289	0.2942	0.2841	0.9231	0.8338	0.1351	0.1293	0.1349	0.1327	0.1361
		0.1358	0.1308	0.1289	0.1391	0.2841	0.9231	0.6365	0.1316	0.1319	0.13	0.1294	0.131
		0.1426	0.133	0.1319	0.427	0.8223	0.7544	0.6245	0.1338	0.3366	0.3377	0.3473	0.3979
		0.1431	0.1324	0.1334	0.1335	0.9195	0.4918	0.8389	0.1325	0.6319	0.7691	0.7691	0.7881
		0.1266	0.1264	0.1295	0.8568	0.5863	0.564	0.686	0.8813	0.7593	0.6845	0.8677	0.6499
		0.1274	0.1278	0.2073	0.537	0.8478	0.5952	0.6375	0.877	0.6817	0.6817	0.6817	0.8925
		0.1271	0.1272	0.1336	0.5331	0.8478	0.744	0.6808	0.7187	0.8215	0.7821	0.7812	0.6576
		0.13	0.126	0.1513	0.6066	0.8337	0.6083	0.5984	0.7776	0.7107	0.6889	0.8282	0.8149
22:00:00	37.00	0.1396	0.1297	0.1286	0.3025	0.2914	0.9213	0.8338	0.135	0.129	0.1346	0.1328	0.135
		0.1357	0.1308	0.1293	0.1397	0.2914	0.9213	0.6371	0.1315	0.1319	0.13	0.1294	0.1309
		0.1423	0.1328	0.1319	0.4367	0.8263	0.7525	0.6246	0.1337	0.3375	0.3383	0.3742	0.3084
		0.1431	0.1324	0.1334	0.1337	0.9213	0.495	0.8446	0.1323	0.6377	0.7686	0.7686	0.7911
		0.1264	0.1263	0.2295	0.892	0.5886	0.5633	0.6903	0.8811	0.7546	0.6832	0.8672	0.6564
		0.1278	0.1277	0.2144	0.5498	0.8471	0.5943	0.6351	0.8724	0.6791	0.6791	0.677	0.8884
		0.1272	0.1271	0.2342	0.5424	0.8471	0.7444	0.6783	0.7136	0.8158	0.7786	0.7774	0.6555
		0.1318	0.1261	0.2574	0.6166	0.8372	0.6083	0.5963	0.7665	0.7114	0.6841	0.8334	0.8105
22:10:00	37.00	0.1395	0.1297	0.1287	0.3176	0.2912	0.9244	0.8312	0.1351	0.1289	0.1346	0.1327	0.1356
		0.1358	0.1307	0.129	0.44	0.2912	0.9244	0.6345	0.1315	0.1318	0.1295	0.1292	0.1309
		0.1426	0.1327	0.1311	0.4444	0.8242	0.7541	0.6231	0.1338	0.3169	0.3169	0.3169	0.3169
		0.1426	0.1323	0.1332	0.4345	0.9218	0.7541	0.8366	0.1325	0.6478	0.7691	0.7691	0.7883
		0.1262	0.1262	0.1295	0.899	0.5877	0.7428	0.6838	0.8814	0.7588	0.6846	0.8672	0.6502
		0.1274	0.1277	0.2216	0.5477	0.8471	0.7428	0.6366	0.8763	0.6801	0.6801	0.6811	0.8922
		0.1272	0.127	0.1358	0.5494	0.8471	0.7428	0.6785	0.7182	0.8198	0.7786	0.7785	0.6564
		0.1291	0.1261	0.1619	0.6241	0.836	0.6081	0.5981	0.7761	0.7096	0.6881	0.826	0.8131
22:20:00	37.00	0.1393	0.1297	0.1286	0.3276	0.8973	0.9221	0.831	0.135	0.1291	0.1345	0.1327	0.1362
		0.1354	0.1306	0.1288	0.4404	0.8973	0.9221	0.6347	0.1314	0.1318	0.1297	0.1293	0.1306
		0.1423	0.1327	0.1315	0.4532	0.8266	0.7523	0.6221	0.1336	0.3405	0.3399	0.3317	0.3317
		0.1428	0.1323	0.1332	0.435	0.9227	0.7523	0.8436	0.1324	0.654	0.7664	0.7678	0.7898
		0.126	0.1262	0.2297	0.9357	0.8465	0.7629	0.6883	0.8802	0.7559	0.683	0.8662	0.6548
		0.1275	0.1277	0.2283	0.5595	0.8465	0.7431	0.6337	0.8714	0.6395	0.6784	0.6741	0.8897
		0.1271	0.1271	0.237	0.5565	0.8465	0.7431	0.6763	0.7106	0.8163	0.7752	0.7759	0.6549
		0.1293	0.1259	0.2693	0.6689	0.8377	0.6074	0.5944	0.7652	0.7104	0.681	0.8308	0.81
22:30:00	37.00	0.1395	0.1297	0.1286	0.4408	0.828	0.9236	0.825	0.135	0.1291	0.1345	0.1326	0.1366
		0.1354	0.1307	0.1288	0.4408	0.828	0.9236	0.6332	0.1314	0.1319	0.1299	0.1292	0.1308
		0.1423	0.1328	0.1315	0.4628	0.828	0.7526	0.6203	0.1337	0.3437	0.343	0.3439	0.3439
		0.1426	0.1323	0.1332	0.4628	0.9243	0.4956	0.845	0.1324	0.655	0.7844	0.77	0.79
		0.126	0.1263	0.2298	0.9506	0.8894	0.7426	0.6812	0.8836	0.7469	0.678	0.8662	0.6664
		0.1272	0.1276	0.2371	0.5662	0.8457	0.7426	0.6344	0.8695	0.6777	0.6777	0.6726	0.8756
		0.1269	0.1268	0.2382	0.5626	0.8457	0.7426	0.6729	0.7099	0.8033	0.7705	0.7761	0.6536
		0.1289	0.1257	0.2773	0.6468	0.8422	0.6067	0.5912	0.7673	0.7082	0.6787	0.8341	0.8068
22:40:00	37.00	0.1392	0.1298	0.1283	0.3526	0.8276	0.9231	0.8289	0.1349	0.1289	0.1346	0.1326	0.1369
		0.1352	0.1308	0.1289	0.3526	0.8276	0.9231	0.6332	0.1314	0.1318	0.1294	0.129	0.1306
		0.1423	0.1324	0.1315	0.4739	0.8276	0.7519	0.6213	0.1335	0.3469	0.3433	0.3433	0.3567
		0.1425	0.1323	0.1332	0.4739	0.9237	0.7519	0.843	0.1323	0.6659	0.7738	0.768	0.7891
		0.126	0.126	0.2418	0.5706	0.8459	0.7419	0.6874	0.8798	0.7547	0.6836	0.8653	0.6552
		0.1272	0.1276	0.2418	0.5706	0.8459	0.7419	0.6333	0.8708	0.2441	0.6776	0.6736	0.8889
		0.1269	0.1269	0.2418	0.5683	0.8459	0.7419	0.6746	0.71	0.8153	0.771	0.7747	0.6537
		0.1289	0.1258	0.2418	0.6602	0.8379	0.6069	0.5928	0.7652	0.7086	0.6805	0.8292	0.8079
22:50:00	37.00	0.1395	0.1294	0.1282	0.4851	0.8258	0.9248	0.8271	0.135	0.1286	0.1344	0.1325	0.1378
		0.1353	0.1306	0.1287	0.4851	0.8258	0.9248	0.6317	0.1314	0.1316	0.1295	0.1292	0.1306
		0.1419	0.1325	0.1307	0.4851	0.8258	0.7528	0.619	0.1335	0.3533	0.3459	0.3459	0.3707
		0.1423	0.132	0.1328	0.4851	0.9238	0.7528	0.8348	0.1323	0.7673	0.7673	0.7673	0.7887
		0.1257	0.1259	0.2462	0.5656	0.845	0.7403	0.6826	0.8786	0.7574	0.8651	0.8651	0.8651
		0.127	0.1275	0.2462	0.5656	0.845	0.7403	0.6345	0.8749	0.6775	0.6775	0.6795	0.8909
		0.1268	0.1267	0.2462	0.5749	0.845	0.7403	0.6764	0.7149	0.8183	0.7719	0.7763	0.6545
		0.1289	0.1258	0.2462	0.3669	0.8379	0.6063	0.5956	0.7748	0.7074	0.6861	0.8244	0.8116
23:00:00	37.00	0.1388	0.1292	0.1285	0.4974	0.8279	0.9236	0.8282	0.1348	0.1287	0.134	0.1323	0.1358
		0.1352	0.1305	0.1286	0.4974	0.8279	0.9236	0.8282	0.1313	0.1316	0.1292	0.129	0.1305
		0.1414	0.1324	0.1314	0.4974	0.8279	0.7515	0.8282	0.1335	0.4556	0.449	0.449	0.4843
		0.1421	0.1319	0.1329	0.4974	0.9238	0.7515	0.842	0.1322	0.767	0.767	0.767	0.7894
		0.1259	0.1258	0.1303	0.5749	0.8449	0.7405	0.6879	0.8788	0.7546	0.682	0.8643	0.6556
		0.127	0.1273	0.2562	0.5749	0.8449	0.7405	0.6308	0.8699	0.8546	0.7764	0.7724	0.887
		0.1266	0.1266	0.2562	0.5783	0.8449	0.7405	0.6736	0.7083	0.8143	0.7681	0.7733	0.6527
		0.1284	0.1262	0.2008	0.5783	0.8391	0.6064	0.6736	0.7652	0.7078	0.6807	0.8296	0.8065
23:10:00	37.00	0.1391	0.1296	0.1283	0.5104	0.8256	0.9252	0.8266	0.135	0.1287	0.1343	0.1323	0.1337
		0.1349	0.1303	0.1285	0.5104	0.8256	0.9252	0.8266	0.1313	0.1316	0.1291	0.1289	0.1304
		0.1418	0.1323	0.1308	0.5104	0.8256	0.7522	0.8266	0.1335	0.4644	0.4524	0.4524	0.4044
		0.1418	0.1317	0.1328	0.5104	0.9247	0.7522	0.8332	0.1323	0.766	0.766	0.766	0.7881
		0.1257	0.1257	0.2305	0.5711	0.844	0.7388	0.6818	0.8775	0.7573	0.8642	0.8642	0.6488
		0.1268	0.1273	0.262	0.5711	0.844	0.7388	0.6332	0.8746	0.8907	0.8907	0.8907	0.8907
		0.1266	0.1266	0.2538	0.5835	0.844	0.7388	0.6758	0.7142	0.8179	0.7693	0.7748	0.6535
		0.1286	0.1255	0.2088	0.5835	0.8381	0.6057	0.6758	0.7744	0.7058	0.6829	0.824	0.8105
23:20:00	37.00	0.1392	0.1292	0.128	0.4038	0.8288	0.9231	0.8272	0.1347	0.1285	0.134	0.1322	0.1334
		0.1348	0.1302	0.1286	0.5242	0.8288	0.9231	0.6311	0.1313	0.1316	0.1292	0.1289	0.1301
		0.1415	0.1324	0.1311	0.5242	0.8288	0.9231	0.8181	0.1333	0.467	0.4562	0.4562	0.4181
		0.1419	0.1318	0.1327	0.5242	0.9258	0.9231	0.8407	0.1309	0.6847	0.6852	0.7656	0.7865
		0.1255	0.1257	0.2305	0.5796	0.8431	0.7392	0.8873	0.8784	0.7534	0.6819	0.8633	0.6539
		0.1268	0.1274	0.269	0.5796	0.8431	0.7392	0.83	0.8689	0.2526	0.6746	0.6715	0.8879
		0.1264	0.1266	0.2572	0.5867	0.8431	0.7392	0.8724	0.7082	0.8135	0.7655	0.772	0.652
		0.1285	0.1257	0.2183	0.5867	0.8415	0.706	0.8908	0.7646	0.7055	0.8281	0.8281	0.8049
23:30:00	37.00	0.1383	0.1289	0.1293	0.4168	0.8263	0.9257	0.8264	0.1349	0.1286	0.134	0.1322	0.1337
		0.1345	0.1305	0.1299	0.5464	0.8263	0.9257	0.8264	0.1314	0.1316	0.1291	0.1287	0.1303
		0.1414	0.1324	0.1323	0.5406	0.8263	0.8509	0.8264	0.1335	0.4739	0.462	0.4363	0.4363
		0.1418	0.1317	0.1338	0.5485	0.9248	0.8957	0.8336	0.1322	0.6907	0.6887	0.7633	0.7852
		0.1257	0.1257	0.2324	0.5762	0.8422	0.8609	0.8836	0.8784	0.7583	0.6841	0.8637	0.6488
		0.1267	0.1273	0.2757	0.5762	0.8422	0.8923	0.8318	0.8733	0.2545	0.6753	0.6775	0.8904
		0.1263	0.1266	0.2648	0.5908	0.8422	0.8377	0.8744	0.7129	0.8169	0.7657	0.7739	0.653
		0.1287	0.1256	0.2273	0.5908	0.8422	0.8057	0.8938	0.7744	0.7036	0.6833	0.8222	0.8101
23:40:00	37.00	0.1389	0.129	0.1284	0.4291	0.3182	0.9237	0.8264	0.1348	0.1285	0.1342	0.132	0.1343
		0.1349	0.1301	0.1285	0.1476	0.3182	0.9237	0.6302	0.1312	0.1312	0.1291	0.1285	0.1302
		0.1419	0.1323	0.1311	0.5577	0.8293	0.7489	0.6167	0.1334	0.4799	0.4799	0.4799	0.4563
		0.1419	0.1317	0.1325	0.1507	0.925	0.4976	0.8408	0.1322	0.6919	0.6893	0.7617	0.7859
		0.1256	0.1259	0.2324	0.5857	0.5947	0.5607	0.6878	0.8775	0.7546	0.6822	0.8625	0.6543
		0.1267	0.1274	0.2841	0.5857	0.8419	0.5907	0.6291	0.8692	0.2559	0.6742	0.67	0.8865
		0.1265	0.1262	0.2669	0.5926	0.8419	0.738	0.6719	0.707	0.8134	0.762	0.7703	0.6513
		0.1285	0.1261	0.2382	0.408	0.8411	0.6053	0.5908	0.7637	0.705	0.6766	0.8273	0.8049
23:50:00	37.00	0.1391	0.129	0.1289	0.4412	0.3135	0.9237	0.8195	0.1348	0.1285	0.1339	0.1321	0.1346
		0.1347	0.1301	0.1298	0.1481	0.3135	0.9237	0.6286	0.1313	0.1314	0.1293	0.1285	0.1302
		0.1413	0.1324	0.1322	0.5759	0.8284	0.7488	0.6141	0.1334	0.4863	0.4765	0.4285	0.4769
		0.1415	0.1316	0.1338	0.1545	0.924	0.4972	0.8443	0.1322	0.6911	0.5034	0.7611	0.7853
		0.1253	0.1256	0.233	0.5886	0.5933	0.561	0.6786	0.8815	0.746	0.6765	0.8622	0.662
		0.1266	0.1271	0.2972	0.5886	0.8412	0.5909	0.6296	0.8677	0.2576	0.6733	0.6688	0.8739
		0.1264	0.1263	0.2972	0.5964	0.8412	0.7372	0.6681	0.7061	0.803	0.7578	0.7704	0.6507
		0.1283	0.1258	0.2972	0.4108	0.8463	0.6052	0.5869	0.7654	0.7043	0.6741	0.8301	0.8042
24:00:00	37.00	0.1387	0.1291	0.1281	0.4543	0.3217	0.924	0.8248	0.1347	0.1285	0.1337	0.1321	0.1343
		0.1341	0.1301	0.1285	0.1503	0.3217	0.924	0.6292	0.1312	0.1313	0.129	0.1284	0.13
		0.1408	0.1323	0.1309	0.5976	0.8275	0.7479	0.6161	0.1333	0.4991	0.4991	0.4991	0.4991
		0.1416	0.1313	0.1326	0.1592	0.9242	0.4973	0.8398	0.1322	0.6981	0.4929	0.7599	0.7827
		0.1252	0.1257	0.3033	0.5905	0.5944	0.5607	0.6865	0.8774	0.7531	0.6809	0.8609	0.653
		0.1265	0.1271	0.3033	0.5905	0.8415	0.5904	0.6277	0.8692	0.2587	0.6725	0.6683	0.8863
		0.1262	0.1262	0.3033	0.5983	0.8415	0.7368	0.6706	0.7068	0.8152	0.7601	0.7693	0.6513
		0.1284	0.1256	0.2569	0.4216	0.8411	0.6045	0.5902	0.7635	0.7036	0.6761	0.8262	0.8046
~End

## Sheet: L.mono.-Lippia citriodora
PlateFormat 96wells		Wells
		A1	A2	A3	A4	A5	A6	A7	A8	A9	A10	A11	A12
		B1	B2	B3	B4	B5	B6	B7	B8	B9	B10	B11	B12
		C1	C2	C3	C4	C5	C6	C7	C8	C9	C10	C11	C12
		D1	D2	D3	D4	D5	D6	D7	D8	D9	D10	D11	D12
		E1	E2	E3	E4	E5	E6	E7	E8	E9	E10	E11	E12
		F1	F2	F3	F4	F5	F6	F7	F8	F9	F10	F11	F12
		G1	G2	G3	G4	G5	G6	G7	G8	G9	G10	G11	G12
		H1	H2	H3	H4	H5	H6	H7	H8	H9	H10	H11	H12
PlateFormat 96wells		Concentration of L. citriodora EO in each well (%v/v) (4 replicates)
		1	0.5	0.25	0.125	0.0625	0.03125	0.015625	0	0.6	0.6	0.6	0.6
		1	0.5	0.25	0.125	0.0625	0.03125	0.015625	0	0.3	0.3	0.3	0.3
		1	0.5	0.25	0.125	0.0625	0.03125	0.015625	0	0.15	0.15	0.15	0.15
		1	0.5	0.26	0.125	0.0625	0.03125	0.015625	0	0.075	0.075	0.075	0.075
		0.8	0.4	0.2	0.1	0.05	0.025	0.0125	0	0.0375	0.0375	0.0375	0.0375
		0.8	0.4	0.2	0.1	0.05	0.025	0.0125	0	0.01875	0.01875	0.01875	0.01875
		0.8	0.4	0.2	0.1	0.05	0.025	0.0125	0	0.009375	0.009375	0.009375	0.009375
		0.8	0.4	0.2	0.1	0.05	0.025	0.0125	0	0.0046875	0.0046875	0.0046875	0.0046875			concentration(%v/v)
PlateFormat 96wells																	1	0.8	0.6	0.5	0.4	0.3	0.25	0.2	0.15	0.125	0.1	0.075	0.0625	0.05	0.0375	0.03125	0.025	0.01875	0.015625	0.0125	0.009375	0.0046875	Control no inoculum no essential oil	Control with inoculum no essential oil
Time(hh:mm:ss)	Temperature(΅C)	absorbance (at 610nm)														Time(hh:mm:ss)	average absorbance /10 min
																00:00	0.160725	0.158075	0.14105	0.1329	0.130375	0.127475	0.206675	0.18025	0.18555	0.16535	0.163225	0.15815	0.1536	0.145975	0.148875	0.1435	0.14485	0.146675	0.141075	0.140725	0.143575	0.148325	0.140225	0.142425
0:00	37.00	0.1916	0.1377	0.2072	0.1644	0.1539	0.1486	0.1455	0.1446	0.1409	0.1466	0.1429	0.1338			10:00	0.163075	0.145575	0.135725	0.1281	0.12825	0.1249	0.193425	0.173775	0.1736	0.15975	0.15875	0.150975	0.15025	0.144525	0.146	0.140625	0.1428	0.1441	0.138275	0.137575	0.141175	0.145475	0.13865	0.140925
		0.1097	0.1344	0.2097	0.1654	0.1565	0.136	0.1425	0.1439	0.129	0.129	0.126	0.1259			20:00	0.1496	0.136775	0.133325	0.1259	0.12695	0.12445	0.18325	0.165725	0.167425	0.1563	0.155625	0.1468	0.147025	0.142175	0.14305	0.1393	0.14235	0.142125	0.137275	0.137	0.14	0.144425	0.13685	0.13915
		0.1585	0.1279	0.2015	0.1699	0.1566	0.1437	0.1394	0.1376	0.1838	0.1876	0.1825	0.1883			30:00	0.1445	0.13425	0.1312	0.12525	0.1264	0.12415	0.176325	0.1601	0.162725	0.149775	0.152925	0.14565	0.145375	0.140875	0.141875	0.138625	0.141425	0.1417	0.1367	0.136375	0.13975	0.14375	0.136325	0.138625
		0.1831	0.1316	0.2083	0.1617	0.1474	0.1457	0.1369	0.1348	0.1616	0.1521	0.1638	0.1551			40:00	0.140925	0.132775	0.13015	0.1249	0.1262	0.12375	0.169075	0.15655	0.1603	0.1467	0.149725	0.144325	0.143975	0.1398	0.1408	0.137975	0.14135	0.1407	0.13615	0.1362	0.139275	0.1435	0.136125	0.138325
		0.1596	0.1291	0.1881	0.1587	0.1515	0.1421	0.1438	0.142	0.148	0.1494	0.1508	0.1473			50:00	0.13835	0.1312	0.1219	0.12475	0.126075	0.19215	0.167325	0.15405	0.1575	0.145525	0.1485	0.143325	0.143525	0.139575	0.1403	0.1379	0.14075	0.14075	0.135825	0.13595	0.139	0.143125	0.13585	0.13815
		0.1504	0.1258	0.1829	0.1614	0.1436	0.1428	0.1383	0.1389	0.1494	0.1483	0.1414	0.1476			1:00:00	0.13735	0.1305	0.121925	0.1936	0.17385	0.186525	0.161475	0.1508	0.1553	0.14435	0.146925	0.14225	0.1429	0.13875	0.13975	0.138325	0.141625	0.14015	0.13545	0.135675	0.138825	0.14285	0.13565	0.137975
		0.1399	0.13	0.1732	0.1604	0.1463	0.1506	0.1395	0.148	0.1396	0.1437	0.1465	0.1445			1:10:00	0.13635	0.129575	0.15485	0.189125	0.169825	0.183575	0.1604	0.15	0.152975	0.143275	0.146175	0.14115	0.142075	0.138475	0.1392	0.136575	0.140275	0.1395	0.1356	0.135475	0.138275	0.14245	0.1355	0.137875
		0.1824	0.1366	0.1768	0.1724	0.1425	0.1439	0.1413	0.1408	0.1431	0.1485	0.1543	0.1474			1:20:00	0.13545	0.1288	0.1419	0.184325	0.168025	0.179475	0.157775	0.14965	0.151575	0.144125	0.14845	0.140875	0.142725	0.139425	0.13905	0.1365	0.13985	0.14005	0.1352	0.135525	0.1387	0.142775	0.135275	0.137675
																1:30:00	0.13465	0.128125	0.1964	0.182025	0.163725	0.176525	0.15575	0.147575	0.150075	0.14155	0.1446	0.14045	0.14105	0.137525	0.138475	0.136225	0.1397	0.13945	0.135	0.135225	0.138475	0.142425	0.135325	0.137475
10:00	37.00	0.1739	0.1312	0.2033	0.1616	0.1474	0.1463	0.1437	0.1434	0.1328	0.1436	0.1372	0.1293			1:40:00	0.134275	0.127875	0.198	0.1769	0.164625	0.17325	0.15405	0.1467	0.148025	0.141125	0.14365	0.139025	0.14025	0.13745	0.13785	0.136075	0.13955	0.138825	0.134725	0.1351	0.137875	0.141975	0.1351	0.13735
		0.1766	0.1296	0.1893	0.1623	0.1545	0.1327	0.1404	0.1421	0.1254	0.1267	0.1244	0.1231			1:50:00	0.136875	0.127375	0.195425	0.1769	0.160875	0.170125	0.15345	0.145625	0.1468	0.14135	0.14435	0.138425	0.1403	0.13705	0.137475	0.13575	0.13955	0.138725	0.13465	0.134975	0.137725	0.141675	0.13505	0.137225
		0.1537	0.1252	0.1867	0.1626	0.1532	0.1407	0.1359	0.1362	0.174	0.1746	0.1694	0.1764			2:00:00	0.133525	0.12725	0.194675	0.171125	0.158575	0.167	0.15075	0.144925	0.1461	0.139175	0.1428	0.13775	0.139625	0.1369	0.137225	0.1356	0.13925	0.138225	0.134475	0.135	0.137775	0.1418	0.134875	0.137125
		0.1481	0.1264	0.1944	0.1525	0.1459	0.1428	0.1331	0.1329	0.1541	0.1454	0.1573	0.1471			2:10:00	0.133	0.12665	0.195025	0.168025	0.15745	0.165375	0.150025	0.143725	0.144625	0.139075	0.142575	0.13705	0.139575	0.136525	0.1367	0.135475	0.139125	0.137875	0.134325	0.13475	0.137125	0.141125	0.1349	0.137125
		0.1455	0.1294	0.1797	0.1551	0.1486	0.1415	0.1405	0.1403	0.145	0.1464	0.1487	0.1439			2:20:00	0.132325	0.126525	0.195275	0.165825	0.1558	0.16345	0.1494	0.143275	0.14445	0.138125	0.141975	0.136975	0.1394	0.13635	0.13685	0.13525	0.138925	0.138125	0.13435	0.13505	0.137675	0.1417	0.134725	0.136925
		0.1365	0.1234	0.1796	0.1559	0.1424	0.1403	0.1353	0.1375	0.1473	0.1457	0.1384	0.145			2:30:00	0.134325	0.1262	0.193575	0.165025	0.153125	0.16155	0.147525	0.142625	0.142575	0.138	0.14165	0.136125	0.139	0.13615	0.136225	0.135625	0.138725	0.1376	0.13405	0.1347	0.1369	0.141	0.13465	0.136925
		0.138	0.1272	0.167	0.1585	0.1447	0.1479	0.1363	0.1467	0.1386	0.1405	0.143	0.1426			2:40:00	0.1313	0.12585	0.194975	0.1623	0.1528	0.159375	0.14715	0.141975	0.142175	0.137425	0.141375	0.136225	0.138875	0.136075	0.136075	0.13475	0.138725	0.13775	0.1341	0.134575	0.137175	0.141225	0.1346	0.1368
		0.1623	0.133	0.1688	0.1655	0.1424	0.1415	0.1382	0.1392	0.1422	0.1447	0.1505	0.1445			2:50:00	0.130675	0.1257	0.197975	0.160225	0.151475	0.158	0.145725	0.141625	0.1414	0.13695	0.14085	0.13555	0.13855	0.135925	0.135975	0.134625	0.138775	0.1374	0.1338	0.134425	0.1367	0.1408	0.13445	0.136775
																3:00:00	0.13325	0.125425	0.192023	0.158625	0.150325	0.1574	0.144725	0.140925	0.1413	0.137025	0.1406	0.135275	0.13825	0.135625	0.13575	0.1347	0.13855	0.137425	0.13375	0.13445	0.1369	0.141025	0.1344	0.1366
20:00	37.00	0.1603	0.1286	0.1941	0.1578	0.1465	0.1453	0.1419	0.1414	0.1312	0.1395	0.1353	0.1273			3:10:00	0.13135	0.12525	0.19165	0.156825	0.14885	0.156075	0.144225	0.140225	0.140825	0.136425	0.14035	0.1355	0.1381	0.135475	0.135725	0.1345	0.13855	0.137825	0.133875	0.1342	0.137175	0.1412	0.13445	0.136625
		0.1533	0.127	0.178	0.1565	0.1529	0.1321	0.1389	0.1404	0.1257	0.1259	0.1234	0.1228			3:20:00	0.13065	0.12515	0.18905	0.15565	0.147925	0.15415	0.143475	0.140175	0.1396	0.13635	0.14015	0.13455	0.138075	0.13545	0.13525	0.135425	0.1396	0.136675	0.13395	0.1343	0.13635	0.1405	0.134325	0.1365
		0.1473	0.1235	0.1785	0.1593	0.1501	0.1392	0.1353	0.1346	0.166	0.1655	0.1668	0.1714			3:30:00	0.1327	0.124875	0.1865	0.154375	0.14735	0.153425	0.142975	0.13965	0.139475	0.135825	0.13985	0.134725	0.137825	0.135225	0.135625	0.13435	0.138125	0.137075	0.133725	0.1342	0.13665	0.1407	0.134275	0.1365
		0.1375	0.1245	0.1824	0.1516	0.1386	0.1406	0.133	0.131	0.1492	0.1419	0.1529	0.1432			3:40:00	0.132875	0.12475	0.184525	0.153725	0.14655	0.1519	0.1426	0.141175	0.13855	0.1356	0.139525	0.1341	0.13745	0.13515	0.13485	0.134175	0.138225	0.136725	0.13345	0.134175	0.13625	0.1404	0.1353	0.1377
		0.1384	0.1263	0.1688	0.1518	0.1464	0.1423	0.14	0.1381	0.1415	0.1426	0.1472	0.1409			3:50:00	0.18495	0.163125	0.18265	0.1523	0.146175	0.15155	0.1417	0.1388	0.1385	0.13525	0.13935	0.1341	0.137425	0.135	0.13515	0.1342	0.1381	0.136775	0.133275	0.1341	0.1365	0.140475	0.134125	0.136375
		0.1315	0.1238	0.1703	0.1534	0.1398	0.1395	0.1345	0.1363	0.1439	0.1438	0.1381	0.1427			4:00:00	0.180975	0.158625	0.17935	0.151725	0.145375	0.149925	0.141375	0.1385	0.138125	0.135075	0.139125	0.13395	0.13715	0.13495	0.135175	0.134125	0.138025	0.13675	0.1334	0.134	0.13635	0.14045	0.13405	0.1362
		0.1338	0.1267	0.1612	0.1534	0.1422	0.1476	0.1358	0.1446	0.1376	0.1391	0.1432	0.1401			4:10:00	0.181675	0.1575	0.1762	0.15085	0.14555	0.149125	0.14065	0.13815	0.1372	0.13585	0.138875	0.1334	0.136825	0.134725	0.134475	0.1338	0.1379	0.136275	0.133175	0.134025	0.135975	0.1401	0.134225	0.13625
		0.1434	0.131	0.1626	0.1639	0.1403	0.14	0.1377	0.1376	0.1408	0.1437	0.1508	0.1424			4:20:00	0.18105	0.15705	0.176875	0.15065	0.144125	0.14865	0.1405	0.1379	0.137275	0.1345	0.138625	0.133225	0.1368	0.1348	0.13435	0.13435	0.138275	0.1362	0.1332	0.1339	0.135875	0.1401	0.1339	0.136175
																4:30:00	0.176625	0.1546	0.17615	0.1489	0.143975	0.148425	0.1401	0.137675	0.1373	0.134325	0.1385	0.133425	0.136725	0.13465	0.1345	0.133675	0.137775	0.136525	0.13425	0.135025	0.13665	0.140225	0.13385	0.136175
30:00	37.00	0.1484	0.1276	0.187	0.149	0.1442	0.1453	0.1415	0.1411	0.129	0.1362	0.1333	0.1263			4:40:00	0.175825	0.155225	0.1735	0.147975	0.14285	0.147775	0.139275	0.13735	0.13725	0.134075	0.13845	0.13345	0.136475	0.135	0.13455	0.13365	0.137825	0.1367	0.13295	0.13385	0.136425	0.140575	0.13385	0.136
		0.149	0.127	0.1766	0.1512	0.152	0.1313	0.1382	0.1395	0.1255	0.1253	0.1234	0.1224			4:50:00	0.1738	0.153575	0.17045	0.1463	0.1421	0.14705	0.13905	0.137025	0.13665	0.13415	0.138125	0.1333	0.13645	0.134425	0.1349	0.133725	0.13755	0.1366	0.13295	0.133775	0.13645	0.14045	0.13385	0.1361
		0.1466	0.1235	0.1675	0.1556	0.1478	0.1378	0.1347	0.1341	0.1596	0.1612	0.1638	0.1663			5:00:00	0.17025	0.1504	0.168575	0.14645	0.1415	0.14595	0.13865	0.1369	0.1362	0.133975	0.137975	0.132975	0.136225	0.13435	0.134275	0.1335	0.13755	0.136225	0.1329	0.13375	0.135875	0.139925	0.1337	0.135975
		0.134	0.1229	0.1742	0.1433	0.1375	0.1401	0.1324	0.1306	0.1484	0.1415	0.1498	0.1429			5:10:00	0.1677	0.1504	0.169	0.145675	0.14115	0.145575	0.138175	0.136575	0.13605	0.13405	0.137775	0.1329	0.136025	0.13435	0.134075	0.133325	0.137575	0.136275	0.13285	0.133625	0.136025	0.1399	0.133775	0.135925
		0.1363	0.126	0.1638	0.1492	0.1446	0.1411	0.1394	0.1377	0.1393	0.1412	0.146	0.141			5:20:00	0.167225	0.15055	0.165425	0.14445	0.140775	0.1444	0.138175	0.136525	0.13585	0.133675	0.137625	0.1326	0.135975	0.13415	0.13415	0.134475	0.1387	0.13595	0.132725	0.1336	0.13585	0.1399	0.133575	0.135825
		0.13	0.1234	0.1627	0.1515	0.1393	0.1385	0.1337	0.1355	0.1435	0.1424	0.138	0.1429			5:30:00	0.166025	0.1493	0.16385	0.14445	0.1404	0.144125	0.1378	0.136275	0.135575	0.13335	0.137575	0.132525	0.135775	0.133975	0.134125	0.133175	0.13735	0.135975	0.133775	0.13485	0.13575	0.139775	0.1335	0.1359
		0.1324	0.1262	0.1564	0.1496	0.1415	0.1464	0.1353	0.1442	0.1367	0.1388	0.143	0.1405			5:40:00	0.163875	0.147075	0.16275	0.1445	0.139975	0.143125	0.13745	0.136075	0.134975	0.13365	0.1374	0.132275	0.136	0.134	0.1335	0.133175	0.13735	0.1356	0.132575	0.133475	0.1354	0.13945	0.133525	0.13565
		0.1383	0.13	0.1575	0.1614	0.1381	0.1397	0.1371	0.1371	0.1397	0.1428	0.1501	0.1424			5:50:00	0.162925	0.1461	0.162175	0.145075	0.1395	0.143425	0.137275	0.135875	0.135575	0.13325	0.137225	0.13245	0.135625	0.134	0.13415	0.13375	0.137175	0.13615	0.132575	0.133425	0.136025	0.139975	0.1335	0.13575
																6:00:00	0.161425	0.14585	0.16135	0.14305	0.13945	0.14255	0.13715	0.135625	0.1347	0.13325	0.137075	0.13185	0.13555	0.134	0.1334	0.132975	0.1372	0.1354	0.13255	0.1334	0.1354	0.1395	0.1334	0.13555
40:00	37.00	0.1445	0.1276	0.178	0.1479	0.1437	0.1439	0.1409	0.1407	0.1278	0.135	0.1326	0.1252			6:10:00	0.1604	0.143975	0.1596	0.1417	0.1392	0.142075	0.136625	0.135575	0.134475	0.1327	0.136875	0.1316	0.135425	0.13375	0.133275	0.132825	0.1372	0.1353	0.132375	0.1334	0.13525	0.13935	0.133375	0.135875
		0.1446	0.1266	0.1677	0.1473	0.1497	0.1307	0.1382	0.1393	0.1249	0.1249	0.1231	0.1221			6:20:00	0.161725	0.145425	0.162025	0.142325	0.13885	0.14155	0.136875	0.135225	0.13435	0.13275	0.1368	0.13155	0.13545	0.133775	0.133125	0.1329	0.137025	0.13525	0.13235	0.133225	0.135225	0.139325	0.1333	0.135525
		0.1449	0.1232	0.1637	0.15	0.1462	0.1376	0.1342	0.1341	0.159	0.1599	0.1597	0.1626			6:30:00	0.15735	0.143675	0.157275	0.1435	0.138575	0.14165	0.136225	0.135225	0.134175	0.13265	0.13665	0.131275	0.135325	0.13365	0.133125	0.133625	0.13695	0.1353	0.13235	0.133275	0.1352	0.139225	0.133275	0.135625
		0.1297	0.1222	0.1669	0.1416	0.1363	0.1397	0.1313	0.1304	0.1457	0.1402	0.1494	0.142			6:40:00	0.156575	0.142375	0.156975	0.1411	0.138125	0.140825	0.1359	0.134925	0.133875	0.1324	0.13655	0.131275	0.135175	0.133575	0.133125	0.13275	0.1371	0.135225	0.13225	0.133125	0.1351	0.139075	0.13315	0.135475
		0.1353	0.1256	0.1592	0.146	0.1434	0.1413	0.1387	0.1372	0.1382	0.141	0.1445	0.1395			6:50:00	0.155175	0.14235	0.1557	0.1404	0.1379	0.14085	0.13585	0.134825	0.1342	0.13245	0.13645	0.131475	0.1352	0.133475	0.13315	0.1329	0.136875	0.135625	0.132225	0.133225	0.135375	0.1393	0.13315	0.135425
		0.1296	0.1233	0.1605	0.1474	0.1383	0.1387	0.1337	0.1352	0.1422	0.1414	0.1371	0.1421			7:00:00	0.154575	0.140775	0.1554	0.140375	0.137825	0.140275	0.135675	0.1346	0.1338	0.132875	0.1363	0.131075	0.1351	0.133425	0.132975	0.13275	0.1368	0.1351	0.1322	0.133125	0.13505	0.13905	0.133075	0.1355
		0.1314	0.1261	0.1531	0.147	0.1408	0.1459	0.1353	0.1439	0.1362	0.1383	0.1424	0.1402			7:10:00	0.15295	0.14105	0.15435	0.139725	0.13725	0.13995	0.135475	0.1345	0.133425	0.132275	0.136225	0.13115	0.135025	0.13335	0.132925	0.132425	0.136925	0.135	0.132075	0.1331	0.135025	0.13915	0.133075	0.135425
		0.1348	0.1298	0.1534	0.1585	0.1367	0.1395	0.1371	0.137	0.1393	0.1427	0.1498	0.1422			7:20:00	0.15365	0.140075	0.153775	0.13965	0.137175	0.13995	0.135075	0.1344	0.133475	0.13225	0.13605	0.130925	0.1349	0.133275	0.132725	0.13255	0.136775	0.134875	0.132225	0.133075	0.134875	0.139275	0.132925	0.13535
																7:30:00	0.15125	0.1399	0.152675	0.139175	0.1369	0.139725	0.13495	0.134125	0.133525	0.13205	0.136025	0.131	0.1349	0.13315	0.133	0.132525	0.1368	0.135225	0.131975	0.133025	0.135275	0.139275	0.1329	0.13535
50:00	37.00	0.1402	0.127	0.1695	0.1464	0.1423	0.1449	0.1411	0.1406	0.1233	0.1204	0.1212	0.1227			7:40:00	0.15075	0.1394	0.152425	0.141525	0.1369	0.139025	0.13475	0.13395	0.13305	0.131925	0.13585	0.1308	0.13475	0.133125	0.132825	0.132275	0.13675	0.134925	0.132	0.1331	0.134975	0.139	0.132825	0.135325
		0.1421	0.1258	0.17	0.1474	0.1492	0.1304	0.1381	0.1391	0.1939	0.1947	0.1934	0.1866			7:50:00	0.14995	0.13875	0.151975	0.138	0.136625	0.138775	0.134775	0.133825	0.13465	0.131875	0.1357	0.1308	0.13465	0.13305	0.13265	0.13235	0.136825	0.13485	0.1322	0.1331	0.1349	0.138925	0.132775	0.1354
		0.1435	0.1233	0.161	0.1481	0.1468	0.1373	0.1335	0.1337	0.1566	0.1561	0.1567	0.1606			8:00:00	0.149275	0.138275	0.151725	0.1379	0.136375	0.13915	0.13445	0.1338	0.1332	0.1318	0.13565	0.13095	0.1346	0.133075	0.13295	0.13225	0.136675	0.13505	0.13205	0.1331	0.135125	0.1393	0.1328	0.135325
		0.1276	0.1229	0.1688	0.1402	0.1358	0.139	0.1306	0.13	0.1456	0.1385	0.1497	0.1395			8:10:00	0.14925	0.13805	0.1507	0.1405	0.13625	0.1383	0.1345	0.1337	0.1328	0.131825	0.135625	0.1306	0.1346	0.13305	0.1327	0.1326	0.136575	0.1348	0.13205	0.1331	0.1348	0.1389	0.1339	0.136625
		0.1339	0.1258	0.1573	0.1455	0.1425	0.1406	0.1388	0.1371	0.1391	0.1398	0.1444	0.1379			8:20:00	0.1473	0.13765	0.14985	0.137925	0.13595	0.1382	0.1342	0.1335	0.132625	0.131575	0.13555	0.130425	0.134475	0.132925	0.1333	0.132175	0.1366	0.134675	0.13205	0.1331	0.134875	0.1391	0.132725	0.1354
		0.1278	0.123	0.1586	0.147	0.1386	0.1375	0.1335	0.135	0.1435	0.142	0.1368	0.1407			8:30:00	0.14685	0.1374	0.1499	0.13745	0.13605	0.138025	0.13395	0.1333	0.13265	0.131525	0.135425	0.13045	0.1345	0.13295	0.132525	0.132125	0.13655	0.13465	0.132025	0.13315	0.1349	0.1391	0.132725	0.13545
		0.1293	0.1261	0.1487	0.1455	0.1403	0.1459	0.1348	0.1436	0.1371	0.1378	0.1424	0.1387			8:40:00	0.146175	0.1368	0.149625	0.137225	0.135575	0.138	0.134	0.13325	0.132775	0.1314	0.13535	0.13065	0.13435	0.13285	0.13265	0.13225	0.136625	0.13495	0.132075	0.1333	0.135125	0.13955	0.132625	0.1355
		0.1338	0.1294	0.1516	0.156	0.1369	0.139	0.1367	0.1369	0.14	0.142	0.1494	0.1411			8:50:00	0.145075	0.136625	0.14955	0.1376	0.135575	0.137875	0.1339	0.133175	0.132525	0.13145	0.135225	0.130375	0.1344	0.1328	0.13265	0.13225	0.136475	0.134925	0.132175	0.133325	0.1353	0.139575	0.132575	0.1356
																9:00:00	0.145325	0.13635	0.148025	0.137175	0.135475	0.1373	0.133775	0.1331	0.1322	0.13135	0.135175	0.130275	0.134275	0.132825	0.13235	0.1327	0.136575	0.13465	0.132025	0.13345	0.135025	0.139575	0.132475	0.135725
1:00:00	37.00	0.1381	0.1987	0.1644	0.1445	0.1421	0.1444	0.141	0.1403	0.1233	0.1205	0.1212	0.1227			9:10:00	0.145125	0.1359	0.147675	0.13665	0.135225	0.138125	0.133425	0.13295	0.132175	0.1312	0.135075	0.13005	0.1341	0.132775	0.1323	0.132275	0.136625	0.134625	0.13215	0.133575	0.13515	0.139675	0.1327	0.135975
		0.1403	0.1986	0.1617	0.1465	0.1489	0.1316	0.1374	0.1389	0.1911	0.1877	0.1876	0.1797			9:20:00	0.144225	0.135925	0.14765	0.1366	0.135125	0.13715	0.13325	0.13305	0.1322	0.131	0.135	0.130125	0.1343	0.13275	0.132125	0.13235	0.136775	0.13485	0.132275	0.133775	0.135225	0.1401	0.132475	0.13625
		0.1427	0.1902	0.1562	0.1475	0.1459	0.1378	0.1336	0.1336	0.1549	0.1564	0.153	0.1569			9:30:00	0.1434	0.13575	0.147375	0.136275	0.134725	0.137175	0.13325	0.132675	0.132175	0.131	0.135	0.13015	0.134	0.1328	0.13255	0.132275	0.136775	0.13505	0.13235	0.134025	0.13575	0.1408	0.13245	0.136525
		0.1283	0.1869	0.1636	0.1389	0.1347	0.1395	0.1298	0.1298	0.1445	0.1384	0.1467	0.1394			9:40:00	0.14255	0.135225	0.150575	0.135675	0.134725	0.1366	0.1333	0.132725	0.131825	0.130975	0.134825	0.129925	0.1341	0.13285	0.1322	0.132225	0.1369	0.135025	0.1326	0.1343	0.1356	0.1408	0.132375	0.1368
		0.1338	0.1794	0.152	0.1439	0.1416	0.1411	0.1384	0.1369	0.138	0.141	0.1424	0.1376			9:50:00	0.141875	0.13515	0.14635	0.1366	0.13485	0.13625	0.132875	0.13255	0.132075	0.131825	0.134775	0.12975	0.134	0.1329	0.132125	0.1323	0.137025	0.13505	0.1339	0.1358	0.135975	0.141225	0.13235	0.137225
		0.1272	0.1722	0.1557	0.1448	0.1372	0.1388	0.133	0.135	0.1426	0.1426	0.1352	0.1402			10:00:00	0.14165	0.13475	0.146	0.135375	0.134575	0.136175	0.132925	0.132475	0.13155	0.13085	0.1347	0.129725	0.13405	0.132875	0.13225	0.132425	0.13725	0.135225	0.134175	0.13625	0.136225	0.14185	0.13225	0.1377
		0.1288	0.1695	0.1474	0.1438	0.14	0.1467	0.1348	0.1434	0.1369	0.1388	0.141	0.1386			10:10:00	0.14185	0.1346	0.14615	0.1354	0.134275	0.1366	0.13285	0.132375	0.132025	0.13075	0.134475	0.130525	0.133925	0.132875	0.132875	0.132925	0.1374	0.1359	0.13315	0.1357	0.13725	0.14305	0.132275	0.1383
		0.1322	0.1743	0.1481	0.1552	0.1362	0.1399	0.1365	0.1366	0.1398	0.143	0.148	0.1406			10:20:00	0.141375	0.13435	0.14585	0.136725	0.134175	0.1364	0.132775	0.13245	0.1317	0.130875	0.13455	0.1299	0.1341	0.133125	0.13265	0.13305	0.137725	0.1359	0.133625	0.13635	0.1374	0.143675	0.1322	0.139025
																10:30:00	0.140125	0.13395	0.14575	0.13485	0.133975	0.136275	0.132575	0.1322	0.1317	0.130975	0.134425	0.1298	0.133925	0.133075	0.132675	0.132975	0.138125	0.136225	0.13405	0.1371	0.13795	0.1448	0.13225	0.1403
1:10:00	37.00	0.1373	0.1919	0.1647	0.1439	0.1408	0.1424	0.1407	0.1402	0.1568	0.1533	0.1562	0.1531			10:40:00	0.14055	0.13365	0.144775	0.13605	0.13385	0.13595	0.13255	0.132075	0.13125	0.13065	0.13445	0.129525	0.134075	0.13325	0.13245	0.133225	0.13855	0.136275	0.1346	0.138	0.138525	0.145675	0.1322	0.141125
		0.1386	0.1949	0.1632	0.1457	0.1475	0.13	0.1373	0.1388	0.1852	0.1865	0.1868	0.1758			10:50:00	0.140375	0.1334	0.14635	0.13515	0.133725	0.1361	0.1323	0.13195	0.13165	0.1305	0.1344	0.13005	0.134025	0.133225	0.132975	0.133575	0.13895	0.1374	0.13515	0.139325	0.13995	0.14765	0.1321	0.142525
		0.1418	0.1829	0.1556	0.1464	0.1459	0.1362	0.1338	0.1334	0.1516	0.154	0.1513	0.155			11:00:00	0.139325	0.133425	0.144875	0.134725	0.133725	0.1359	0.132325	0.131875	0.131675	0.130375	0.134275	0.130175	0.134	0.134175	0.1332	0.13365	0.1395	0.137725	0.1358	0.14085	0.140925	0.149675	0.132075	0.144275
		0.1277	0.1868	0.1581	0.1371	0.1341	0.1377	0.1306	0.1296	0.1433	0.1367	0.1472	0.1374			11:10:00	0.138975	0.13325	0.144	0.137625	0.133475	0.13565	0.13235	0.13175	0.1312	0.130325	0.1343	0.129675	0.133975	0.13445	0.133025	0.1342	0.14025	0.13805	0.136675	0.142575	0.141875	0.15145	0.13205	0.146125
		0.132	0.1781	0.1507	0.144	0.1414	0.1398	0.138	0.1367	0.1361	0.1393	0.1441	0.1373			11:20:00	0.13835	0.133125	0.1444	0.134225	0.133725	0.135275	0.1322	0.131725	0.130975	0.130375	0.1343	0.129275	0.134075	0.1342	0.132875	0.134775	0.141175	0.138675	0.137775	0.1448	0.143325	0.1538	0.13195	0.148375
		0.1257	0.1632	0.1545	0.144	0.1374	0.1373	0.1328	0.1348	0.1411	0.1407	0.1366	0.1396			11:30:00	0.13825	0.133025	0.14385	0.13425	0.133325	0.1361	0.132025	0.13145	0.13145	0.13025	0.1343	0.129925	0.134125	0.13535	0.133825	0.13555	0.14215	0.140075	0.14035	0.148425	0.1456	0.15725	0.13195	0.1514
		0.1285	0.1648	0.1468	0.143	0.1396	0.1456	0.1345	0.1434	0.1356	0.1373	0.142	0.1382			11:40:00	0.13805	0.132775	0.14385	0.1335	0.133225	0.13525	0.131725	0.13155	0.130925	0.130025	0.134325	0.1295	0.13535	0.13645	0.13375	0.136125	0.143325	0.140875	0.14195	0.151425	0.1476	0.160725	0.133	0.15575
		0.1321	0.1732	0.148	0.1537	0.1355	0.1384	0.1366	0.1366	0.1386	0.1418	0.149	0.1404			11:50:00	0.13755	0.1324	0.142775	0.133575	0.133125	0.134775	0.1317	0.131375	0.1305	0.1301	0.1343	0.12925	0.1343	0.13555	0.133875	0.1373	0.144925	0.1419	0.1427	0.15355	0.150025	0.16455	0.131875	0.158825
																12:00:00	0.1376	0.13235	0.1434	0.134	0.1328	0.1347	0.131825	0.131325	0.130575	0.130175	0.13425	0.129275	0.1345	0.13635	0.1342	0.1392	0.1475	0.143475	0.14625	0.1589	0.15315	0.169625	0.1331	0.16455
1:20:00	37.00	0.136	0.1883	0.1634	0.1444	0.1413	0.1421	0.1404	0.14	0.1462	0.148	0.125	0.1484			12:10:00	0.136925	0.13225	0.145025	0.13335	0.13285	0.13455	0.13165	0.131275	0.130475	0.130075	0.1342	0.129275	0.1348	0.137275	0.13475	0.1406	0.149775	0.145275	0.14895	0.163575	0.15705	0.17535	0.1319	0.169275
		0.1379	0.1864	0.1594	0.145	0.1481	0.1299	0.1372	0.1384	0.1818	0.1827	0.1813	0.1721			12:20:00	0.1367	0.132175	0.142375	0.1332	0.1327	0.134725	0.1315	0.131175	0.130575	0.130275	0.134325	0.1296	0.135	0.138275	0.1357	0.141875	0.1521	0.148075	0.1511	0.167975	0.161675	0.1821	0.131775	0.1753
		0.1407	0.1778	0.1535	0.1479	0.1463	0.1367	0.1336	0.1333	0.1501	0.1518	0.1498	0.1546			12:30:00	0.13635	0.1319	0.142125	0.1331	0.132675	0.134325	0.131425	0.131175	0.1303	0.13035	0.134425	0.12935	0.1351	0.1391	0.136275	0.143675	0.154925	0.150075	0.15485	0.17425	0.166575	0.189325	0.1318	0.18275
		0.1272	0.1848	0.1548	0.1392	0.1352	0.1373	0.1296	0.1294	0.1421	0.1373	0.1466	0.1375			12:40:00	0.136475	0.131675	0.142475	0.133525	0.1325	0.13495	0.131525	0.131	0.131675	0.129975	0.134525	0.130125	0.135575	0.14075	0.138675	0.145125	0.157125	0.1538	0.16075	0.1825	0.17315	0.19865	0.131725	0.191175
		0.1313	0.1708	0.151	0.1514	0.1422	0.1393	0.138	0.1365	0.1358	0.1399	0.1427	0.1378			12:50:00	0.13575	0.13165	0.14175	0.134775	0.13255	0.134375	0.13125	0.13085	0.130375	0.1299	0.134575	0.12995	0.13585	0.142475	0.13885	0.14825	0.162975	0.15745	0.166175	0.19115	0.18	0.2084	0.13175	0.2012
		0.1249	0.1706	0.1533	0.1451	0.1376	0.137	0.1329	0.1346	0.1412	0.1418	0.1364	0.1408			13:00:00	0.13565	0.13145	0.142	0.1326	0.132225	0.134625	0.131125	0.13075	0.130625	0.1299	0.1347	0.1302	0.13765	0.14615	0.140525	0.14985	0.165875	0.162125	0.172175	0.200975	0.188475	0.220125	0.13165	0.2117
		0.1283	0.1632	0.1475	0.1434	0.1409	0.1452	0.1346	0.1431	0.1353	0.1384	0.1419	0.1392			13:10:00	0.135625	0.13125	0.14175	0.1332	0.13215	0.1342	0.1311	0.1308	0.130275	0.129825	0.13495	0.130075	0.13695	0.14655	0.141825	0.15435	0.172525	0.166825	0.179	0.211475	0.19725	0.2323	0.13165	0.22355
		0.1307	0.1675	0.1468	0.1539	0.137	0.1379	0.1366	0.1365	0.1382	0.1425	0.1489	0.1415			13:20:00	0.13515	0.1312	0.141225	0.1323	0.1322	0.13405	0.131	0.1307	0.1303	0.129875	0.1352	0.130375	0.13785	0.1495	0.14385	0.1581	0.1791	0.17245	0.186975	0.2243	0.207775	0.2473	0.13155	0.236775
																13:30:00	0.13515	0.13095	0.1417	0.132225	0.131975	0.1345	0.130875	0.1306	0.130675	0.129875	0.135375	0.13105	0.138475	0.1528	0.14675	0.1624	0.18655	0.179825	0.195375	0.237875	0.219475	0.264975	0.131675	0.25025
1:30:00	37.00	0.1348	0.1808	0.1609	0.1432	0.1401	0.1421	0.1401	0.14	0.1936	0.1976	0.1946	0.1998			13:40:00	0.13475	0.1308	0.1419	0.132825	0.131975	0.1347	0.1308	0.13045	0.130975	0.129925	0.13575	0.131825	0.13965	0.156725	0.150125	0.1675	0.19605	0.18805	0.2052	0.2548	0.232075	0.285375	0.13155	0.267975
		0.1375	0.1908	0.1581	0.1433	0.1467	0.1296	0.1371	0.1386	0.1792	0.1791	0.1776	0.1702			13:50:00	0.1345	0.130625	0.141425	0.13195	0.13185	0.1344	0.1308	0.130475	0.13055	0.12995	0.13605	0.13175	0.14055	0.161175	0.1526	0.173175	0.206225	0.196375	0.214875	0.269525	0.244725	0.306925	0.13145	0.287675
		0.1397	0.1702	0.1488	0.1433	0.144	0.1363	0.1331	0.1333	0.1479	0.1507	0.1482	0.1535			14:00:00	0.13435	0.130625	0.141325	0.132025	0.131925	0.13435	0.1305	0.13035	0.13055	0.1297	0.13655	0.132225	0.142175	0.166625	0.1566	0.180325	0.2186	0.2062	0.226775	0.290225	0.259975	0.331675	0.1314	0.3107
		0.1266	0.1863	0.1552	0.1364	0.1334	0.1369	0.1297	0.1294	0.1418	0.1364	0.1458	0.1378			14:10:00	0.134475	0.130675	0.141075	0.132075	0.131625	0.135	0.13055	0.1303	0.130375	0.1303	0.1369	0.132425	0.143625	0.17245	0.1609	0.187125	0.2329	0.21675	0.238675	0.31425	0.27685	0.359	0.131375	0.33465
		0.1301	0.1655	0.1473	0.1412	0.1405	0.1388	0.1378	0.1363	0.1351	0.1395	0.1426	0.1367			14:20:00	0.134175	0.130275	0.14115	0.13155	0.13155	0.1345	0.13045	0.13035	0.130775	0.129675	0.13795	0.1335	0.145675	0.179775	0.166625	0.194675	0.249225	0.228025	0.2534	0.340625	0.2972	0.3851	0.131325	0.36245
		0.1248	0.1624	0.1525	0.1429	0.1359	0.137	0.1326	0.1345	0.1408	0.1412	0.1356	0.1402			14:30:00	0.1337	0.1303	0.141475	0.132625	0.13155	0.134	0.13035	0.1302	0.1304	0.1299	0.1385	0.133925	0.149	0.189175	0.17385	0.2032	0.2688	0.241	0.270175	0.37125	0.318475	0.414975	0.1313	0.389775
		0.1275	0.1589	0.1449	0.1418	0.1388	0.1448	0.1345	0.1428	0.1352	0.1381	0.1416	0.139			14:40:00	0.133575	0.13015	0.14095	0.13145	0.1314	0.13405	0.130325	0.130225	0.130725	0.13015	0.13955	0.1354	0.15075	0.196825	0.180825	0.213225	0.288975	0.2551	0.2884	0.401	0.343125	0.442	0.132375	0.418775
		0.1301	0.1681	0.1456	0.1525	0.1349	0.1382	0.136	0.1363	0.138	0.1423	0.1485	0.1409			14:50:00	0.13345	0.13005	0.1408	0.131275	0.13135	0.13445	0.130125	0.1301	0.130625	0.13005	0.140575	0.13595	0.154925	0.2094	0.19005	0.225525	0.311725	0.273175	0.308775	0.432775	0.369075	0.473975	0.131225	0.449225
																15:00:00	0.1334	0.129825	0.14065	0.13375	0.131425	0.13415	0.13015	0.13005	0.130775	0.130325	0.141925	0.1378	0.15785	0.22	0.203575	0.239025	0.3339	0.292425	0.332175	0.46405	0.402375	0.506625	0.132325	0.481425
1:40:00	37.00	0.1346	0.1832	0.159	0.1408	0.1388	0.1431	0.1399	0.1397	0.1995	0.1985	0.1948	0.1992			15:10:00	0.133325	0.12985	0.142375	0.131175	0.1311	0.133925	0.130025	0.13	0.130625	0.13055	0.143325	0.13885	0.163075	0.234125	0.21305	0.253125	0.3565	0.313675	0.355425	0.492825	0.43595	0.5398	0.131975	0.512525
		0.1372	0.174	0.1567	0.1429	0.1458	0.1295	0.1368	0.1383	0.1749	0.1779	0.1731	0.1671			15:20:00	0.13285	0.12975	0.140425	0.133075	0.1311	0.133875	0.13	0.12985	0.13035	0.130575	0.145175	0.14115	0.167825	0.2496	0.225	0.26795	0.38085	0.336575	0.3796	0.51785	0.465525	0.567625	0.13185	0.537975
		0.1388	0.1716	0.1478	0.1446	0.1436	0.1357	0.1331	0.1332	0.1464	0.149	0.1451	0.1516			15:30:00	0.1327	0.12955	0.140425	0.131725	0.131075	0.133925	0.129975	0.129775	0.1306	0.13085	0.147025	0.142875	0.173875	0.267525	0.241875	0.284525	0.40615	0.362175	0.406	0.5459	0.499075	0.585925	0.131925	0.560275
		0.1265	0.1788	0.1527	0.1362	0.1328	0.136	0.1291	0.1292	0.1406	0.1362	0.1439	0.1354			15:40:00	0.13265	0.12955	0.141275	0.134425	0.130975	0.134	0.1299	0.129875	0.130175	0.13105	0.1496	0.144975	0.1795	0.2861	0.2576	0.302325	0.43405	0.38675	0.434325	0.570175	0.52865	0.597925	0.132225	0.5677
		0.1302	0.1634	0.1474	0.1403	0.1402	0.1388	0.1376	0.136	0.1349	0.1398	0.1407	0.136			15:50:00	0.13275	0.129425	0.1401	0.1306	0.13085	0.13405	0.129775	0.1297	0.132	0.13155	0.15255	0.148525	0.187475	0.30985	0.2808	0.3195	0.463075	0.413725	0.46595	0.589775	0.55545	0.604675	0.131575	0.576725
		0.124	0.169	0.1501	0.1419	0.1357	0.1368	0.1326	0.1346	0.1404	0.1413	0.1346	0.139			16:00:00	0.1323	0.129325	0.14025	0.130625	0.13085	0.134075	0.129675	0.129875	0.130425	0.132025	0.1556	0.15165	0.194525	0.332825	0.3035	0.339075	0.48515	0.439975	0.490575	0.605475	0.573825	0.60885	0.132175	0.57685
		0.1275	0.1572	0.1447	0.141	0.1388	0.1447	0.1342	0.1424	0.1352	0.1383	0.1403	0.1377			16:10:00	0.132325	0.1291	0.13995	0.132375	0.13075	0.133425	0.12975	0.1296	0.13075	0.132425	0.16005	0.15575	0.203925	0.358175	0.333975	0.36385	0.51185	0.47275	0.517025	0.603175	0.579	0.61035	0.1322	0.580975
		0.1298	0.1689	0.1446	0.1514	0.1351	0.1379	0.136	0.1364	0.1381	0.1423	0.1475	0.14			16:20:00	0.1321	0.1291	0.1408	0.1305	0.13075	0.133525	0.129775	0.1296	0.130975	0.134325	0.165775	0.16065	0.215025	0.385275	0.36305	0.387	0.527575	0.500925	0.535625	0.602575	0.58505	0.60985	0.1319	0.58365
																16:30:00	0.1321	0.12915	0.140875	0.13065	0.130625	0.133275	0.12965	0.129525	0.13065	0.135075	0.17085	0.165175	0.2263	0.413425	0.395075	0.4045	0.540225	0.521725	0.539075	0.60205	0.584925	0.6095	0.13155	0.5859
1:50:00	37.00	0.1339	0.1754	0.1593	0.1414	0.1397	0.1415	0.1399	0.1396	0.1964	0.1947	0.1982	0.1924			16:40:00	0.132075	0.12905	0.14	0.13025	0.130575	0.1332	0.129475	0.129575	0.131075	0.13475	0.174875	0.170925	0.240525	0.44275	0.428375	0.42005	0.55405	0.530175	0.543175	0.60265	0.584775	0.608475	0.1318	0.587425
		0.1367	0.1814	0.1553	0.1435	0.1452	0.1296	0.1366	0.1384	0.1723	0.1722	0.1715	0.1645			16:50:00	0.131825	0.12905	0.139775	0.13035	0.13065	0.1332	0.12955	0.12955	0.13115	0.13565	0.1815	0.178175	0.25595	0.473375	0.46875	0.431025	0.567925	0.5393	0.548875	0.602525	0.586125	0.607475	0.1318	0.5899
		0.1506	0.1761	0.1472	0.1439	0.1438	0.1358	0.1329	0.1331	0.1449	0.1458	0.1449	0.1516			17:00:00	0.131575	0.128825	0.1395	0.130175	0.130575	0.1332	0.129525	0.12945	0.130925	0.136825	0.188125	0.1906	0.2731	0.506425	0.51455	0.439775	0.576175	0.546675	0.549975	0.60445	0.585975	0.606525	0.132075	0.592025
		0.1263	0.1747	0.152	0.1366	0.1325	0.1361	0.1292	0.1291	0.1405	0.1341	0.1432	0.1359			17:10:00	0.13145	0.128775	0.1392	0.13	0.1304	0.1332	0.12945	0.129525	0.1308	0.138275	0.197775	0.195575	0.293125	0.5301	0.559575	0.453725	0.577475	0.5576	0.550225	0.60265	0.5874	0.60595	0.13185	0.5925
		0.1293	0.162	0.1457	0.1414	0.1396	0.1389	0.1374	0.136	0.1348	0.1377	0.1407	0.1367			17:20:00	0.131575	0.128725	0.13935	0.1301	0.13055	0.1329	0.1294	0.129625	0.13185	0.139725	0.20685	0.207725	0.31295	0.548625	0.58995	0.45785	0.577775	0.5562	0.55105	0.6024	0.5867	0.6046	0.132025	0.5935
		0.1233	0.1613	0.1497	0.1418	0.1355	0.1369	0.1324	0.1344	0.1402	0.14	0.1345	0.1402			17:30:00	0.1312	0.1286	0.139075	0.129925	0.130175	0.132875	0.12935	0.129525	0.13195	0.141675	0.21965	0.21765	0.335575	0.55855	0.6365	0.4657	0.579875	0.561375	0.551475	0.601525	0.5872	0.603975	0.1318	0.594475
		0.1275	0.157	0.1436	0.1424	0.1387	0.1449	0.134	0.1423	0.1355	0.1368	0.1399	0.1387			17:40:00	0.13105	0.1285	0.139	0.1298	0.130275	0.13285	0.129275	0.12955	0.13225	0.145	0.233875	0.23175	0.3603	0.560375	0.679975	0.46795	0.580675	0.563675	0.55225	0.60125	0.587275	0.60305	0.1317	0.595775
		0.1294	0.1632	0.1435	0.1518	0.1344	0.1375	0.1361	0.1362	0.1378	0.1407	0.1473	0.1409			17:50:00	0.131075	0.128475	0.13935	0.129825	0.130225	0.132775	0.129225	0.129525	0.1327	0.14755	0.247625	0.2476	0.383275	0.56	0.7125	0.470575	0.5812	0.56535	0.5516	0.600075	0.586975	0.602575	0.132075	0.59745
																18:00:00	0.131025	0.1284	0.138775	0.1297	0.1301	0.13265	0.12915	0.129575	0.132525	0.150775	0.2619	0.257275	0.4085	0.559475	0.7407	0.474025	0.581425	0.565875	0.55205	0.599125	0.586725	0.601675	0.1313	0.598525
2:00:00	37.00	0.1337	0.1772	0.1543	0.139	0.1389	0.1412	0.1398	0.1394	0.1929	0.1996	0.1943	0.1919			18:10:00	0.131	0.128325	0.13875	0.1295	0.13	0.132775	0.129225	0.129625	0.133575	0.154425	0.277225	0.277075	0.430125	0.5595	0.76785	0.476525	0.58245	0.566225	0.552375	0.598325	0.586825	0.6013	0.13195	0.60085
		0.136	0.1718	0.1523	0.1409	0.1448	0.1295	0.1364	0.1381	0.1675	0.1685	0.1706	0.1614			18:20:00	0.13075	0.12835	0.138575	0.129475	0.129975	0.1325	0.128925	0.129725	0.13475	0.1584	0.29335	0.304375	0.444225	0.55665	0.77125	0.4771	0.582475	0.5659	0.5518	0.59825	0.587075	0.601	0.131925	0.6028
		0.1384	0.168	0.1455	0.1424	0.1429	0.136	0.1329	0.133	0.1439	0.1467	0.1445	0.1493			18:30:00	0.130725	0.1282	0.138625	0.1296	0.1298	0.132475	0.129025	0.129775	0.1356	0.16325	0.313075	0.32875	0.46285	0.556125	0.786025	0.4804	0.582575	0.566525	0.552675	0.5978	0.587525	0.601225	0.131975	0.6047
		0.126	0.1675	0.1509	0.1344	0.1319	0.1357	0.1288	0.129	0.1393	0.1335	0.1438	0.1344			18:40:00	0.13065	0.128225	0.138475	0.129375	0.129875	0.132575	0.1288	0.13005	0.136775	0.168425	0.334025	0.359225	0.472125	0.554025	0.787125	0.4826	0.58225	0.566525	0.5527	0.596975	0.587875	0.60075	0.13195	0.606575
		0.1286	0.1594	0.1456	0.139	0.1396	0.1386	0.1375	0.1358	0.1345	0.1377	0.1411	0.1356			18:50:00	0.1308	0.127975	0.138625	0.129275	0.129825	0.132475	0.128975	0.129925	0.1378	0.174675	0.356525	0.39115	0.48145	0.552875	0.790225	0.483525	0.583425	0.567075	0.553575	0.597325	0.588175	0.601	0.1316	0.60895
		0.1236	0.1611	0.1487	0.141	0.1352	0.1367	0.1324	0.1342	0.1395	0.1397	0.1354	0.1383			19:00:00	0.13055	0.128	0.138625	0.12915	0.129725	0.13225	0.1289	0.13025	0.139725	0.18105	0.37465	0.416925	0.49135	0.550425	0.7937	0.485625	0.58445	0.56645	0.553975	0.59685	0.588275	0.60025	0.13185	0.610175
		0.1272	0.1543	0.1426	0.1408	0.1382	0.1446	0.1342	0.1423	0.1361	0.1368	0.141	0.1372			19:10:00	0.130325	0.12785	0.138425	0.129325	0.129575	0.132375	0.128775	0.130375	0.1419	0.18925	0.39295	0.444575	0.502175	0.549175	0.798575	0.486325	0.584775	0.567875	0.55455	0.5968	0.5891	0.600475	0.1315	0.612725
		0.1296	0.1595	0.1428	0.1504	0.1346	0.1371	0.1359	0.1362	0.1383	0.1407	0.1483	0.1399			19:20:00	0.130325	0.1279	0.138275	0.129175	0.12975	0.1322	0.128675	0.130675	0.143175	0.199375	0.411425	0.4788	0.512575	0.5469	0.7853	0.487025	0.586125	0.568425	0.5555	0.597025	0.589625	0.600325	0.131475	0.61375
																19:30:00	0.130275	0.127675	0.138375	0.12895	0.1296	0.132175	0.128525	0.130925	0.15255	0.208825	0.43005	0.5546	0.520725	0.546175	0.7821	0.485575	0.587175	0.56895	0.557075	0.597875	0.5902	0.60015	0.131525	0.616575
2:10:00	37.00	0.1333	0.1722	0.1528	0.1392	0.1389	0.141	0.1395	0.1398	0.1993	0.1923	0.1964	0.1921			19:40:00	0.130225	0.127675	0.137975	0.130425	0.129425	0.13215	0.128625	0.131225	0.1491	0.222275	0.450125	0.559125	0.530175	0.54555	0.7792	0.485975	0.5885	0.570325	0.557975	0.597525	0.5906	0.600325	0.131725	0.617675
		0.1356	0.1733	0.1529	0.1405	0.1446	0.1294	0.1363	0.138	0.1689	0.1663	0.1662	0.1601			19:50:00	0.130075	0.127525	0.13805	0.1289	0.129475	0.13195	0.128675	0.1315	0.15615	0.2342	0.46625	0.578225	0.53395	0.544925	0.771875	0.483875	0.58965	0.570025	0.5587	0.597975	0.5911	0.599725	0.131425	0.61935
		0.1385	0.1611	0.1444	0.1415	0.1431	0.1352	0.1325	0.1329	0.143	0.1447	0.1428	0.148			20:00:00	0.129775	0.127575	0.1381	0.128825	0.12955	0.131925	0.128575	0.132025	0.160025	0.2483	0.479475	0.59065	0.539725	0.5452	0.76385	0.48375	0.590675	0.570475	0.559825	0.5978	0.59145	0.59985	0.131425	0.620525
		0.1246	0.1655	0.15	0.1351	0.1317	0.1363	0.129	0.1289	0.1383	0.1331	0.1425	0.1343			20:10:00	0.12985	0.127575	0.1379	0.1287	0.1294	0.131925	0.128625	0.13255	0.16765	0.26475	0.490475	0.6062	0.543025	0.545475	0.761	0.483125	0.59175	0.570925	0.5606	0.5983	0.592	0.599775	0.131075	0.6224
		0.1282	0.1571	0.1441	0.1397	0.139	0.1384	0.137	0.1359	0.1346	0.1374	0.1396	0.1352			20:20:00	0.129875	0.127425	0.137925	0.128575	0.1295	0.13195	0.12865	0.133225	0.1592	0.286125	0.4926	0.638525	0.53985	0.546575	0.7579	0.48455	0.59285	0.5727	0.5621	0.598475	0.592525	0.6004	0.13185	0.6244
		0.1229	0.1583	0.1481	0.14	0.1345	0.1366	0.1323	0.1342	0.14	0.1392	0.1339	0.1384			20:30:00	0.129775	0.12735	0.1395	0.12855	0.129275	0.131775	0.128425	0.134	0.166525	0.304225	0.487575	0.64615	0.537275	0.548075	0.752175	0.4844	0.5937	0.57255	0.562375	0.5985	0.592675	0.6002	0.1311	0.626025
		0.127	0.1521	0.1412	0.1408	0.1382	0.1445	0.1339	0.1423	0.1349	0.1365	0.1396	0.1375			20:40:00	0.12965	0.1274	0.137925	0.1286	0.129275	0.13185	0.128575	0.1349	0.170625	0.3268	0.483475	0.675075	0.533325	0.549025	0.74445	0.48445	0.594775	0.573325	0.5638	0.59955	0.593425	0.600575	0.1311	0.6264
		0.1285	0.1623	0.1415	0.1498	0.1344	0.137	0.1358	0.1361	0.1376	0.1405	0.1469	0.1395			20:50:00	0.129575	0.12735	0.141875	0.1284	0.12925	0.131825	0.12855	0.136	0.175325	0.3515	0.4764	0.6914	0.529375	0.5502	0.74215	0.4837	0.595725	0.574075	0.565025	0.599875	0.59355	0.6007	0.131525	0.62745
																21:00:00	0.12955	0.127325	0.137775	0.128575	0.129225	0.1316	0.128425	0.137025	0.18665	0.376425	0.470775	0.697725	0.522075	0.550525	0.7337	0.482375	0.596325	0.574	0.565525	0.6004	0.59395	0.600575	0.131325	0.627175
2:20:00	37.00	0.1338	0.1676	0.1529	0.1383	0.1383	0.1408	0.1393	0.1393	0.1968	0.1985	0.1911	0.1947			21:10:00	0.129425	0.1272	0.13775	0.12855	0.129325	0.1316	0.1285	0.138875	0.1968	0.406025	0.469725	0.73585	0.5166	0.55265	0.73125	0.483125	0.596975	0.575275	0.566575	0.60115	0.5944	0.60125	0.13135	0.62855
		0.1343	0.1724	0.1519	0.14	0.1444	0.1293	0.1361	0.1379	0.1648	0.1652	0.1656	0.1582			21:20:00	0.129375	0.127125	0.138125	0.128375	0.1291	0.132425	0.1283	0.14055	0.219525	0.433475	0.465	0.73525	0.51275	0.553075	0.72415	0.482175	0.597975	0.5754	0.5681	0.60215	0.59525	0.60165	0.1313	0.62945
		0.1376	0.1601	0.144	0.141	0.143	0.1349	0.1327	0.1329	0.1422	0.1447	0.1437	0.1472			21:30:00	0.129475	0.127075	0.137525	0.128175	0.128925	0.131475	0.12845	0.142575	0.207675	0.46115	0.465675	0.7641	0.50945	0.55555	0.72275	0.48295	0.599425	0.5764	0.569	0.60235	0.595675	0.6023	0.131375	0.63125
		0.1236	0.1632	0.1488	0.1332	0.1319	0.136	0.1293	0.1288	0.1377	0.134	0.1429	0.1333			21:40:00	0.129375	0.127025	0.13725	0.128275	0.12915	0.13135	0.128375	0.145225	0.245175	0.49275	0.4665	0.773075	0.505275	0.556475	0.718375	0.481575	0.600975	0.577175	0.57045	0.603	0.59595	0.60285	0.1317	0.63255
		0.1283	0.1555	0.1439	0.1391	0.1389	0.1383	0.1383	0.1356	0.1338	0.1383	0.141	0.1343			21:50:00	0.12925	0.127075	0.137175	0.128125	0.12905	0.1312	0.12835	0.147725	0.261775	0.518275	0.46475	0.7886	0.501275	0.5584	0.713675	0.4813	0.6022	0.57735	0.571025	0.6035	0.596575	0.6031	0.1313	0.633225
		0.123	0.1565	0.1475	0.1393	0.1346	0.1365	0.1322	0.1341	0.1395	0.1402	0.1351	0.1377			22:00:00	0.129275	0.126975	0.13715	0.128125	0.129025	0.131325	0.128425	0.15105	0.24725	0.54745	0.46625	0.8435	0.497425	0.56065	0.7118	0.481925	0.60405	0.5783	0.571425	0.60405	0.5973	0.604475	0.131	0.6343
		0.1269	0.1514	0.1404	0.1402	0.1378	0.1442	0.134	0.142	0.1348	0.1375	0.141	0.1374			22:10:00	0.129075	0.126875	0.137775	0.12835	0.1289	0.1318	0.128225	0.154625	0.284075	0.561075	0.4623	0.830575	0.494175	0.56045	0.706725	0.480425	0.60525	0.57885	0.57255	0.6049	0.59815	0.6057	0.1317	0.63495
		0.1279	0.1598	0.1413	0.1493	0.1341	0.1367	0.1357	0.136	0.1376	0.1416	0.148	0.1396			22:20:00	0.129025	0.126925	0.137125	0.128	0.128875	0.131125	0.1283	0.158225	0.308125	0.56755	0.4582	0.84265	0.49175	0.562425	0.701725	0.480875	0.605625	0.5789	0.5727	0.60545	0.599325	0.6068	0.1317	0.63545
																22:30:00	0.12905	0.126825	0.13715	0.128	0.12875	0.1311	0.128375	0.163025	0.307625	0.572425	0.458825	0.880125	0.489475	0.564475	0.701225	0.480875	0.60515	0.5795	0.5722	0.6053	0.599775	0.608075	0.1317	0.6373
2:30:00	37.00	0.1334	0.1652	0.1511	0.1381	0.1384	0.1431	0.1391	0.1392	0.1925	0.1938	0.1949	0.1931			22:40:00	0.12905	0.126825	0.136825	0.12785	0.129	0.1314	0.12825	0.16845	0.324075	0.579575	0.461	0.876475	0.4883	0.565325	0.696975	0.481625	0.6057	0.580375	0.57315	0.606425	0.60175	0.611475	0.13155	0.638275
		0.1337	0.1696	0.15	0.14	0.1439	0.1291	0.1359	0.1378	0.1626	0.163	0.1634	0.1572			22:50:00	0.128775	0.126675	0.137225	0.12785	0.12875	0.130975	0.1284	0.17495	0.336175	0.591575	0.459925	0.8918	0.48645	0.5665	0.6958	0.480825	0.6059	0.581025	0.57235	0.606825	0.6028	0.613675	0.131	0.6404
		0.1472	0.1621	0.1423	0.1409	0.1424	0.1349	0.1326	0.1328	0.1419	0.1424	0.1405	0.1455			23:00:00	0.128825	0.126575	0.136825	0.1278	0.1288	0.1311	0.128375	0.181525	0.340625	0.5721	0.459175	0.895175	0.484525	0.5673	0.69205	0.48085	0.60595	0.5808	0.572925	0.60805	0.604525	0.6165	0.1311	0.641
		0.123	0.1632	0.1467	0.133	0.1313	0.1354	0.1286	0.1288	0.1375	0.1322	0.1411	0.1337			23:10:00	0.12855	0.126525	0.13665	0.12775	0.12865	0.130975	0.12845	0.1895	0.356125	0.57235	0.460225	0.8939	0.48525	0.567725	0.6901	0.47975	0.604975	0.58055	0.5727	0.6092	0.60675	0.618825	0.131275	0.642125
		0.1279	0.1535	0.1429	0.1393	0.1387	0.1382	0.1368	0.1356	0.134	0.1368	0.1395	0.1346			23:20:00	0.128675	0.1265	0.136775	0.127625	0.1286	0.130675	0.128325	0.19715	0.370975	0.569425	0.46035	0.896675	0.4841	0.5689	0.6867	0.480375	0.604625	0.582025	0.574725	0.6113	0.6098	0.622375	0.1313	0.643025
		0.1232	0.1539	0.1469	0.139	0.1344	0.136	0.1321	0.134	0.1394	0.139	0.1339	0.1381			23:30:00	0.128475	0.1265	0.136875	0.1276	0.128525	0.1315	0.128525	0.207975	0.390425	0.5656	0.461975	0.911775	0.4841	0.5697	0.68755	0.4782	0.604125	0.582675	0.575025	0.6121	0.61145	0.624275	0.131675	0.644875
		0.1268	0.1502	0.1401	0.1397	0.1377	0.1442	0.134	0.1421	0.1347	0.1361	0.1394	0.1374			23:40:00	0.1283	0.126275	0.138025	0.1275	0.128475	0.13135	0.12845	0.217375	0.404175	0.560325	0.461325	0.9082	0.48365	0.5704	0.683725	0.479175	0.604225	0.58345	0.57605	0.61355	0.61365	0.6277	0.131275	0.646
		0.1269	0.1549	0.1406	0.1486	0.1338	0.1365	0.1359	0.136	0.1376	0.1402	0.1468	0.1394			23:50:00	0.1285	0.12635	0.1382	0.1275	0.128525	0.130575	0.12845	0.226275	0.418475	0.55155	0.460275	0.905975	0.4843	0.570525	0.680525	0.479425	0.60405	0.583125	0.5772	0.615175	0.61535	0.6309	0.131275	0.6464
																24:00:00	0.128325	0.126275	0.14055	0.127375	0.128525	0.1304	0.1285	0.2354	0.428025	0.547475	0.45955	0.903125	0.483775	0.57055	0.676025	0.47925	0.604475	0.58185	0.577025	0.615825	0.616425	0.63355	0.131175	0.645475
2:40:00	37.00	0.1327	0.1638	0.1491	0.1374	0.1381	0.1407	0.1392	0.1392	0.1962	0.1909	0.1984	0.1944
		0.1327	0.1659	0.1496	0.1395	0.1438	0.129	0.1359	0.1378	0.1605	0.1604	0.1616	0.155
		0.1373	0.1586	0.1429	0.1402	0.1423	0.1344	0.1324	0.1327	0.1406	0.1424	0.14	0.1457
		0.1225	0.1609	0.147	0.1326	0.1313	0.1349	0.1289	0.1287	0.1371	0.1337	0.1411	0.133
		0.1275	0.152	0.1426	0.139	0.1386	0.1384	0.137	0.1355	0.1332	0.1377	0.1392	0.1342
		0.1228	0.1541	0.1454	0.1387	0.1344	0.1359	0.1321	0.134	0.1394	0.1402	0.1338	0.1376
		0.1267	0.1501	0.1398	0.1395	0.1374	0.144	0.1336	0.1418	0.1345	0.1372	0.1397	0.1373
		0.1264	0.155	0.1401	0.1483	0.1339	0.1366	0.1356	0.1359	0.1376	0.1414	0.1465	0.1394
2:50:00	37.00	0.1319	0.1639	0.1485	0.1371	0.1377	0.14	0.1388	0.139	0.2054	0.1959	0.1971	0.1935
		0.1314	0.1646	0.1483	0.139	0.1431	0.1289	0.1357	0.1376	0.1597	0.1582	0.1601	0.154
		0.137	0.1537	0.1413	0.1397	0.1424	0.1349	0.1322	0.1327	0.1406	0.1412	0.1392	0.1446
		0.1224	0.1587	0.1448	0.132	0.131	0.1347	0.1285	0.1285	0.1372	0.1322	0.1401	0.1327
		0.1274	0.1502	0.1426	0.1382	0.1383	0.1383	0.1367	0.1354	0.1331	0.1369	0.1391	0.1348
		0.1228	0.1512	0.1454	0.1383	0.1339	0.1362	0.132	0.134	0.1393	0.1388	0.1338	0.1377
		0.1264	0.1486	0.1389	0.1387	0.1378	0.1441	0.1335	0.1418	0.1346	0.136	0.1393	0.1369
		0.1262	0.1559	0.1396	0.1482	0.1337	0.1365	0.1355	0.1359	0.1373	0.1401	0.1465	0.1393
3:00:00	37.00	0.1308	0.1621	0.1483	0.1367	0.1372	0.1408	0.1387	0.1389	0.19019	0.192	0.195	0.1909
		0.131	0.1617	0.1475	0.1388	0.1431	0.1288	0.1357	0.1376	0.1583	0.1589	0.1587	0.1537
		0.1492	0.1533	0.1398	0.1398	0.142	0.1346	0.132	0.1326	0.1395	0.1407	0.1395	0.1455
		0.122	0.1574	0.1433	0.1328	0.1307	0.1346	0.1286	0.1285	0.1368	0.1317	0.1394	0.1332
		0.1275	0.1499	0.1416	0.138	0.1378	0.138	0.1364	0.1352	0.1331	0.1361	0.1385	0.1353
		0.1224	0.1508	0.145	0.1378	0.134	0.136	0.1318	0.1338	0.1391	0.1389	0.1334	0.1383
		0.1265	0.1479	0.1385	0.1388	0.1371	0.144	0.1336	0.1416	0.1345	0.1357	0.1394	0.138
		0.1253	0.1527	0.1386	0.1478	0.1336	0.1362	0.136	0.1358	0.1372	0.1401	0.1465	0.1403
3:10:00	37.00	0.1299	0.1589	0.1471	0.1368	0.1372	0.14	0.139	0.1389	0.1959	0.1925	0.1915	0.1867
		0.1303	0.1606	0.1469	0.1385	0.1432	0.1289	0.1356	0.1377	0.158	0.1568	0.1584	0.1511
		0.1439	0.1524	0.14	0.1389	0.1417	0.1346	0.1321	0.1327	0.1391	0.1413	0.1395	0.1434
		0.1213	0.1554	0.1429	0.1315	0.1303	0.1345	0.1288	0.1285	0.1364	0.1329	0.1409	0.1318
		0.127	0.1484	0.1408	0.1378	0.138	0.1381	0.1362	0.1353	0.1326	0.1373	0.1392	0.1338
		0.1226	0.1499	0.1442	0.1372	0.1336	0.1363	0.1317	0.1338	0.139	0.1397	0.1352	0.1374
		0.1263	0.1465	0.1378	0.1387	0.137	0.1437	0.1335	0.1416	0.1345	0.1369	0.1406	0.1367
		0.1251	0.1506	0.1381	0.1477	0.1333	0.1361	0.1354	0.1358	0.1372	0.1411	0.1475	0.139
3:20:00	37.00	0.1295	0.157	0.1469	0.1363	0.1377	0.1409	0.1398	0.139	0.1957	0.1865	0.1879	0.1861
		0.13	0.1595	0.1457	0.1385	0.1428	0.1299	0.1356	0.1375	0.1561	0.1545	0.1556	0.1504
		0.1418	0.1503	0.1388	0.1388	0.1416	0.1354	0.1322	0.1325	0.1385	0.1394	0.1376	0.1429
		0.1213	0.1558	0.1425	0.1318	0.1302	0.1355	0.1282	0.1283	0.1366	0.1312	0.139	0.1314
		0.127	0.1472	0.1407	0.1375	0.1377	0.1394	0.1365	0.1351	0.1329	0.1361	0.1382	0.1338
		0.1225	0.1485	0.1439	0.1373	0.1337	0.1367	0.1318	0.1338	0.1383	0.1384	0.1329	0.1371
		0.1264	0.1457	0.1378	0.1383	0.137	0.1451	0.1333	0.1414	0.1342	0.1356	0.1391	0.1365
		0.1247	0.1503	0.1383	0.1475	0.1334	0.1372	0.1356	0.1357	0.137	0.1397	0.1461	0.1392
3:30:00	37.00	0.129	0.1572	0.1462	0.1357	0.137	0.14	0.1391	0.1389	0.1927	0.1838	0.1863	0.1832
		0.1298	0.1573	0.145	0.1381	0.1426	0.1288	0.1355	0.1373	0.155	0.1529	0.1562	0.1496
		0.1509	0.1498	0.1384	0.1387	0.1415	0.1344	0.1321	0.1325	0.1377	0.1395	0.1381	0.1426
		0.1211	0.1532	0.1423	0.1308	0.1302	0.1342	0.1282	0.1284	0.1364	0.1307	0.1402	0.1316
		0.1266	0.1468	0.1403	0.137	0.1376	0.1376	0.1361	0.1351	0.1325	0.1361	0.1398	0.1341
		0.1223	0.1472	0.1431	0.1367	0.1333	0.1353	0.1316	0.1337	0.1385	0.1384	0.1346	0.1368
		0.1262	0.1453	0.1371	0.1381	0.1367	0.1436	0.1335	0.1415	0.1345	0.1355	0.1399	0.1367
		0.1244	0.1501	0.1381	0.1476	0.1333	0.136	0.1356	0.1357	0.137	0.1397	0.1472	0.1389
3:40:00	37.00	0.1282	0.1547	0.1455	0.1354	0.1363	0.1398	0.1386	0.1397	0.1896	0.182	0.1841	0.1824
		0.1294	0.1595	0.1449	0.1379	0.1421	0.1287	0.1354	0.1384	0.1537	0.1517	0.1534	0.1488
		0.1528	0.1494	0.1378	0.1383	0.1415	0.1339	0.1319	0.1336	0.1377	0.138	0.1367	0.1418
		0.1211	0.1513	0.1422	0.1308	0.1299	0.1343	0.1279	0.1295	0.1357	0.1307	0.1387	0.1313
		0.1264	0.1458	0.1402	0.137	0.1376	0.1378	0.1364	0.1365	0.1322	0.136	0.1376	0.1336
		0.1222	0.1462	0.1426	0.1364	0.1334	0.1355	0.1317	0.1349	0.1383	0.1383	0.1333	0.137
		0.1262	0.1445	0.1439	0.1382	0.1364	0.1436	0.1332	0.1425	0.134	0.1356	0.1391	0.1363
		0.1242	0.1497	0.138	0.1465	0.1332	0.136	0.1354	0.1369	0.137	0.1397	0.1461	0.1388
3:50:00	37.00	0.1995	0.1545	0.1443	0.1348	0.1369	0.1399	0.1385	0.1386	0.1844	0.1786	0.1881	0.1795
		0.1893	0.1547	0.1439	0.1375	0.1417	0.1287	0.1352	0.1372	0.1517	0.153	0.1542	0.1473
		0.1779	0.1462	0.1373	0.1382	0.1415	0.1341	0.1316	0.1325	0.1371	0.138	0.1374	0.1415
		0.1731	0.1538	0.1413	0.1305	0.1296	0.1341	0.1278	0.1282	0.1353	0.1308	0.1394	0.1309
		0.1631	0.1448	0.1395	0.1366	0.1373	0.1375	0.1361	0.135	0.1323	0.1357	0.139	0.1336
		0.1631	0.1481	0.142	0.1367	0.1331	0.1355	0.1316	0.1336	0.1383	0.138	0.1342	0.1366
		0.1678	0.1439	0.1362	0.138	0.1364	0.1435	0.1334	0.1413	0.1343	0.1354	0.1399	0.1364
		0.1585	0.1479	0.1375	0.1461	0.1332	0.1359	0.1353	0.1356	0.1368	0.1395	0.147	0.1386
4:00:00	37.00	0.1986	0.1531	0.1446	0.1348	0.1368	0.1395	0.1385	0.1385	0.1825	0.1773	0.1792	0.1784
		0.1832	0.1539	0.1432	0.1374	0.1413	0.129	0.1357	0.1372	0.1505	0.1516	0.1517	0.1459
		0.1723	0.1473	0.1368	0.138	0.141	0.134	0.1316	0.1324	0.1365	0.1387	0.1359	0.1414
		0.1698	0.1526	0.1409	0.1301	0.1295	0.134	0.1278	0.1281	0.1352	0.1315	0.1383	0.1308
		0.1582	0.1432	0.1389	0.1363	0.1371	0.1378	0.1359	0.1347	0.1325	0.1366	0.1381	0.1335
		0.1594	0.1464	0.142	0.1367	0.133	0.1351	0.1315	0.1335	0.138	0.1392	0.1334	0.1364
		0.1639	0.1443	0.136	0.1377	0.1364	0.1434	0.1335	0.1411	0.1339	0.1365	0.1387	0.1363
		0.153	0.1476	0.1371	0.1458	0.1333	0.1358	0.1351	0.1355	0.1368	0.1406	0.1458	0.1386
4:10:00	37.00	0.1984	0.1535	0.1441	0.1392	0.1359	0.1395	0.1387	0.1386	0.1811	0.1743	0.175	0.1744
		0.1872	0.1537	0.1426	0.1371	0.1413	0.1284	0.1351	0.1372	0.1515	0.1489	0.1507	0.1454
		0.1742	0.1457	0.1358	0.1375	0.1408	0.1336	0.1313	0.133	0.136	0.1373	0.1352	0.1403
		0.1669	0.1505	0.1401	0.1296	0.1293	0.1337	0.1276	0.1281	0.1347	0.1303	0.1378	0.1308
		0.1553	0.1438	0.1388	0.1365	0.1368	0.1374	0.1359	0.1349	0.1316	0.1351	0.1378	0.1334
		0.1581	0.1469	0.1415	0.1363	0.1331	0.1352	0.1314	0.1335	0.1379	0.1379	0.1328	0.1365
		0.1638	0.1441	0.1356	0.1373	0.1362	0.1433	0.1336	0.141	0.134	0.1351	0.1385	0.1363
		0.1528	0.1474	0.1367	0.1454	0.1328	0.1357	0.1352	0.1356	0.1367	0.1394	0.1458	0.1385
4:20:00	37.00	0.2053	0.1511	0.143	0.1344	0.1358	0.1409	0.1384	0.1383	0.1822	0.1722	0.1785	0.1746
		0.183	0.1507	0.1427	0.1371	0.1414	0.1287	0.1351	0.1371	0.1507	0.148	0.1506	0.1453
		0.1699	0.1461	0.136	0.1369	0.1407	0.1343	0.1316	0.1322	0.1362	0.137	0.1354	0.1405
		0.166	0.1547	0.1403	0.1296	0.1293	0.1335	0.1277	0.128	0.135	0.13	0.1378	0.1301
		0.1569	0.1435	0.1388	0.1364	0.1369	0.1394	0.1358	0.1347	0.1316	0.1351	0.1373	0.1334
		0.1565	0.1433	0.1409	0.1358	0.133	0.135	0.1316	0.1335	0.1377	0.1378	0.1331	0.1362
		0.1639	0.1428	0.1355	0.1372	0.1364	0.1431	0.1331	0.1409	0.1337	0.135	0.1387	0.1361
		0.1509	0.1469	0.1364	0.1451	0.1329	0.1356	0.1351	0.1356	0.1366	0.1394	0.1457	0.1387
4:30:00	37.00	0.1954	0.1518	0.1429	0.1346	0.1362	0.1394	0.1395	0.1384	0.178	0.1726	0.1821	0.1719
		0.1846	0.1509	0.1422	0.1366	0.1411	0.1284	0.1362	0.1369	0.1498	0.1494	0.1497	0.1448
		0.1666	0.1455	0.1355	0.1369	0.1404	0.1335	0.1326	0.1321	0.1359	0.1376	0.1352	0.1405
		0.1599	0.1474	0.1398	0.1292	0.1292	0.1334	0.1287	0.128	0.1345	0.1311	0.1375	0.1306
		0.1535	0.1419	0.1383	0.136	0.1367	0.1374	0.137	0.1347	0.1318	0.1361	0.1371	0.133
		0.1548	0.1446	0.1413	0.1358	0.1328	0.1349	0.1326	0.1338	0.138	0.139	0.1328	0.1363
		0.1596	0.143	0.135	0.1371	0.1364	0.1432	0.1344	0.1408	0.136	0.136	0.1385	0.1361
		0.1505	0.1464	0.1361	0.1451	0.1327	0.1356	0.1361	0.1354	0.1366	0.1403	0.1456	0.1384
4:40:00	37.00	0.1934	0.1508	0.1416	0.134	0.1355	0.1393	0.1382	0.1384	0.1754	0.1687	0.1794	0.1705
		0.1833	0.1499	0.1413	0.1365	0.141	0.1285	0.1348	0.1369	0.149	0.1468	0.1505	0.1448
		0.1662	0.1438	0.1349	0.1367	0.1406	0.1336	0.1314	0.1322	0.1355	0.1365	0.1358	0.1412
		0.1604	0.1474	0.1393	0.1291	0.1288	0.1332	0.1274	0.1279	0.1342	0.1299	0.1385	0.1312
		0.1563	0.1414	0.1381	0.1359	0.1366	0.1377	0.1359	0.1345	0.1315	0.1344	0.1382	0.1341
		0.1549	0.1443	0.1406	0.136	0.1331	0.1349	0.1314	0.1333	0.1376	0.1375	0.1342	0.1375
		0.1586	0.1409	0.1349	0.1371	0.1366	0.1431	0.133	0.1407	0.1338	0.135	0.1396	0.1373
		0.1511	0.1448	0.1358	0.1448	0.1337	0.1356	0.1351	0.1355	0.1365	0.1396	0.1467	0.1395
4:50:00	37.00	0.1906	0.1492	0.1419	0.1344	0.1355	0.1395	0.1383	0.1385	0.1767	0.1676	0.1682	0.1693
		0.1777	0.148	0.141	0.1362	0.141	0.1284	0.135	0.137	0.1482	0.1475	0.1485	0.144
		0.1664	0.143	0.1344	0.1369	0.1404	0.1335	0.1313	0.1321	0.135	0.1368	0.1342	0.1406
		0.1605	0.145	0.1389	0.1291	0.1289	0.1335	0.1272	0.1278	0.1342	0.1308	0.1368	0.1314
		0.152	0.1411	0.1377	0.1358	0.1364	0.137	0.1358	0.1346	0.1314	0.1362	0.1376	0.1344
		0.1545	0.1425	0.1403	0.1355	0.1327	0.1347	0.1312	0.1334	0.1375	0.1387	0.1329	0.1373
		0.1587	0.1404	0.1347	0.1369	0.1358	0.1431	0.1332	0.141	0.1338	0.1362	0.1386	0.1372
		0.1491	0.1444	0.1354	0.1443	0.1328	0.1354	0.1349	0.1354	0.1366	0.1403	0.1455	0.1394
5:00:00	37.00	0.1866	0.1488	0.1411	0.1342	0.135	0.1391	0.1383	0.1381	0.1736	0.1652	0.1695	0.166
		0.1762	0.1479	0.1404	0.1364	0.1409	0.1284	0.1346	0.1369	0.1469	0.1458	0.1486	0.1425
		0.1631	0.143	0.1344	0.1364	0.1403	0.1334	0.1315	0.132	0.1348	0.1354	0.1353	0.1393
		0.1551	0.1461	0.1387	0.1289	0.1287	0.1331	0.1272	0.1278	0.1341	0.1297	0.1384	0.1297
		0.1493	0.1402	0.1378	0.1355	0.1362	0.137	0.1356	0.1344	0.1312	0.1346	0.1381	0.1332
		0.1513	0.1421	0.14	0.1356	0.1324	0.1348	0.1315	0.1333	0.1376	0.1374	0.1341	0.1358
		0.1541	0.1403	0.1343	0.1367	0.136	0.1432	0.1329	0.1409	0.1336	0.1347	0.1393	0.1359
		0.1469	0.1434	0.1355	0.1441	0.1328	0.1352	0.135	0.1353	0.1364	0.1389	0.1462	0.1382
5:10:00	37.00	0.1821	0.1481	0.1406	0.1339	0.1352	0.1391	0.1384	0.1383	0.171	0.1649	0.175	0.1651
		0.1765	0.147	0.1401	0.1361	0.1402	0.1279	0.1346	0.1368	0.1467	0.1455	0.1481	0.142
		0.1595	0.1421	0.1338	0.1362	0.14	0.1331	0.1314	0.1322	0.1346	0.1354	0.1355	0.1387
		0.1527	0.1455	0.1382	0.13	0.1287	0.1332	0.127	0.1278	0.1342	0.1296	0.1383	0.1295
		0.1499	0.1391	0.137	0.1353	0.1364	0.1371	0.1354	0.1345	0.1312	0.1344	0.1379	0.1328
		0.1529	0.1425	0.1398	0.1352	0.1324	0.1347	0.131	0.1333	0.1373	0.1375	0.1344	0.1359
		0.1528	0.14	0.1345	0.1367	0.1359	0.1433	0.1329	0.1406	0.1338	0.1348	0.1395	0.136
		0.146	0.143	0.135	0.1439	0.1327	0.1352	0.1352	0.1353	0.1363	0.139	0.1463	0.138
5:20:00	37.00	0.1803	0.1461	0.1408	0.1339	0.1352	0.1401	0.1381	0.138	0.17	0.1634	0.1644	0.1639
		0.1755	0.146	0.1401	0.1358	0.14	0.1292	0.1346	0.1366	0.1465	0.1454	0.1445	0.1412
		0.1603	0.1412	0.1336	0.1365	0.14	0.1343	0.1313	0.132	0.1345	0.1364	0.1337	0.1388
		0.1528	0.1445	0.1382	0.1285	0.1287	0.1343	0.1269	0.1277	0.1338	0.1306	0.1364	0.1296
		0.1486	0.1396	0.1372	0.1352	0.1362	0.1385	0.1356	0.1344	0.1312	0.1356	0.137	0.1328
		0.1521	0.1418	0.14	0.1353	0.1323	0.1358	0.1311	0.1331	0.1371	0.1385	0.1325	0.1357
		0.1558	0.1392	0.1343	0.1362	0.1355	0.1441	0.1328	0.1405	0.1336	0.1357	0.1383	0.1358
		0.1457	0.1425	0.1346	0.1438	0.1326	0.1364	0.1349	0.1353	0.1363	0.14	0.1451	0.1382
5:30:00	37.00	0.1819	0.1472	0.1408	0.1336	0.1349	0.139	0.1391	0.138	0.168	0.1613	0.1646	0.1615
		0.1713	0.1458	0.1393	0.1356	0.1401	0.1278	0.1356	0.1364	0.1459	0.1445	0.1455	0.1406
		0.1581	0.1414	0.1335	0.136	0.1399	0.1331	0.1324	0.1319	0.1342	0.1346	0.1347	0.1388
		0.1528	0.1434	0.1376	0.1282	0.1282	0.1328	0.128	0.1277	0.1338	0.1293	0.1373	0.1297
		0.1476	0.1384	0.1368	0.1352	0.1359	0.1369	0.1367	0.1343	0.1316	0.1342	0.1381	0.1326
		0.1487	0.1412	0.1393	0.1352	0.1322	0.1346	0.1322	0.1337	0.1372	0.1372	0.1338	0.1357
		0.1553	0.1399	0.1342	0.1363	0.1353	0.1428	0.1339	0.1404	0.1334	0.1345	0.1392	0.1359
		0.1456	0.1421	0.1348	0.1436	0.1325	0.1351	0.1366	0.1352	0.1363	0.1388	0.1461	0.1379
5:40:00	37.00	0.1794	0.1485	0.1399	0.1349	0.1352	0.1389	0.138	0.138	0.1675	0.1591	0.1633	0.1611
		0.1694	0.1455	0.1392	0.1358	0.1402	0.128	0.1345	0.1367	0.1449	0.1431	0.1441	0.1404
		0.1574	0.1406	0.1333	0.1356	0.1401	0.1333	0.1309	0.1318	0.134	0.1344	0.1333	0.1382
		0.1493	0.1434	0.1374	0.1283	0.1285	0.1325	0.1269	0.1276	0.134	0.1292	0.1364	0.1295
		0.1456	0.1385	0.1367	0.1349	0.1361	0.137	0.1352	0.1341	0.1309	0.1342	0.1364	0.1325
		0.1477	0.1409	0.1391	0.135	0.132	0.1345	0.131	0.1331	0.1371	0.1372	0.1326	0.1355
		0.1503	0.139	0.1338	0.1363	0.1354	0.1428	0.1328	0.1403	0.1336	0.1345	0.1379	0.1356
		0.1447	0.1415	0.1347	0.1434	0.1325	0.1351	0.1349	0.1351	0.1362	0.1387	0.1449	0.138
5:50:00	37.00	0.1774	0.1459	0.1396	0.1334	0.1348	0.1414	0.138	0.1379	0.1665	0.1597	0.1614	0.1611
		0.1694	0.145	0.1394	0.1356	0.1399	0.1278	0.1344	0.1366	0.1448	0.1433	0.1433	0.1423
		0.1543	0.1401	0.1329	0.1358	0.1397	0.1332	0.131	0.1319	0.1339	0.1359	0.1331	0.1394
		0.1506	0.1493	0.1372	0.1282	0.1281	0.1326	0.1269	0.1276	0.1336	0.1302	0.1358	0.1302
		0.1447	0.1378	0.1365	0.1347	0.1359	0.1367	0.1352	0.1342	0.131	0.1353	0.1366	0.1337
		0.1478	0.1403	0.139	0.1348	0.1321	0.1343	0.131	0.1331	0.1371	0.1382	0.1326	0.1367
		0.1494	0.1385	0.1336	0.1361	0.1357	0.1427	0.1327	0.1404	0.1334	0.1359	0.1381	0.1367
		0.1425	0.1414	0.1344	0.1433	0.1323	0.135	0.1348	0.1353	0.1363	0.1397	0.145	0.1389
6:00:00	37.00	0.1755	0.1457	0.1396	0.1333	0.1348	0.1387	0.1382	0.1378	0.1668	0.1562	0.1626	0.1598
		0.1671	0.1455	0.1394	0.1354	0.1399	0.1278	0.1343	0.1364	0.1445	0.143	0.1432	0.1395
		0.1545	0.139	0.1326	0.1354	0.1395	0.1329	0.131	0.1318	0.1337	0.1343	0.1328	0.138
		0.1486	0.142	0.137	0.1289	0.128	0.1325	0.1267	0.1276	0.1331	0.1295	0.1361	0.1287
		0.1438	0.1375	0.1362	0.1348	0.136	0.1369	0.135	0.134	0.1308	0.1339	0.1364	0.1325
		0.1469	0.1402	0.1387	0.1346	0.1321	0.1344	0.1311	0.133	0.1371	0.1371	0.1322	0.1352
		0.1506	0.1384	0.1333	0.1358	0.1356	0.1426	0.1327	0.1402	0.1334	0.1345	0.138	0.1357
		0.1421	0.1417	0.1343	0.1431	0.1323	0.1349	0.1348	0.135	0.1365	0.1387	0.1449	0.1379
6:10:00	37.00	0.1741	0.1443	0.1393	0.1327	0.1347	0.1385	0.1378	0.1378	0.1642	0.1554	0.1593	0.1595
		0.1665	0.1434	0.1385	0.1352	0.1398	0.1275	0.1344	0.1364	0.1433	0.1418	0.1429	0.1403
		0.1522	0.1383	0.1321	0.1353	0.1393	0.1329	0.1308	0.1318	0.1333	0.1342	0.1325	0.1379
		0.1488	0.1408	0.1366	0.1276	0.1279	0.1324	0.1265	0.1275	0.1332	0.1291	0.1355	0.1286
		0.1424	0.1371	0.1361	0.1346	0.1358	0.1365	0.135	0.1342	0.1308	0.1338	0.136	0.1325
		0.1452	0.1405	0.1387	0.1345	0.132	0.1344	0.1311	0.1341	0.1369	0.1369	0.1323	0.1351
		0.147	0.1386	0.1333	0.1356	0.135	0.1428	0.1327	0.1402	0.1333	0.1342	0.138	0.1355
		0.1413	0.1406	0.1342	0.1428	0.1322	0.1351	0.1348	0.135	0.1361	0.1386	0.1449	0.1378
6:20:00	37.00	0.176	0.1457	0.1405	0.1331	0.1347	0.1385	0.1378	0.1377	0.1638	0.1553	0.1713	0.1577
		0.1685	0.1446	0.1383	0.1351	0.1396	0.1279	0.1343	0.1363	0.1438	0.1413	0.1423	0.1388
		0.1547	0.1387	0.132	0.1349	0.1396	0.1328	0.1309	0.1318	0.1333	0.1341	0.1323	0.1377
		0.1477	0.1403	0.1367	0.1279	0.1279	0.1324	0.1264	0.1274	0.133	0.1288	0.1355	0.1289
		0.1451	0.1372	0.1356	0.1345	0.1361	0.1364	0.1348	0.134	0.1307	0.1335	0.1361	0.1322
		0.1458	0.1393	0.1383	0.1343	0.1318	0.1342	0.1307	0.133	0.1369	0.1369	0.1321	0.1351
		0.1481	0.1377	0.1332	0.1356	0.1351	0.1426	0.1327	0.14	0.1334	0.1343	0.1379	0.1353
		0.1427	0.1412	0.1338	0.1428	0.1321	0.1349	0.1347	0.1351	0.136	0.1384	0.1447	0.1382
6:30:00	37.00	0.1689	0.144	0.1386	0.1329	0.1346	0.1419	0.1379	0.1379	0.1611	0.153	0.1586	0.1564
		0.1648	0.1431	0.1379	0.1351	0.1397	0.1276	0.1343	0.1362	0.1433	0.1411	0.1418	0.1404
		0.1511	0.1375	0.132	0.135	0.1395	0.1326	0.1308	0.1317	0.1329	0.1339	0.1324	0.1375
		0.1446	0.1494	0.1364	0.1276	0.1275	0.1324	0.1264	0.1273	0.1328	0.1283	0.1356	0.1284
		0.1417	0.1366	0.1357	0.1343	0.1356	0.1365	0.135	0.1341	0.1309	0.1334	0.1359	0.1323
		0.1445	0.1391	0.1382	0.1343	0.1316	0.1341	0.1308	0.1329	0.1369	0.1367	0.1323	0.1353
		0.1479	0.1378	0.1332	0.1356	0.1352	0.1425	0.1326	0.1401	0.1332	0.1342	0.1377	0.1357
		0.1406	0.1408	0.1338	0.1424	0.1322	0.1347	0.1347	0.1354	0.1361	0.1385	0.1447	0.1376
6:40:00	37.00	0.1707	0.1433	0.1383	0.1329	0.1344	0.1387	0.138	0.1376	0.1611	0.1522	0.1595	0.1551
		0.163	0.1439	0.1378	0.1348	0.1396	0.1275	0.134	0.1361	0.1428	0.1409	0.1411	0.1385
		0.1494	0.1377	0.1314	0.1347	0.1391	0.1327	0.1306	0.1316	0.1327	0.1336	0.1322	0.137
		0.1432	0.1395	0.1361	0.1272	0.1276	0.1321	0.1264	0.1273	0.1327	0.1286	0.1355	0.1283
		0.1407	0.1364	0.1356	0.1343	0.1356	0.1364	0.1347	0.134	0.1305	0.1334	0.1361	0.1325
		0.1431	0.1392	0.1378	0.1343	0.1315	0.1345	0.1307	0.1329	0.1366	0.1372	0.1322	0.1349
		0.1465	0.1373	0.1326	0.1354	0.135	0.1426	0.1326	0.1401	0.1333	0.1341	0.1376	0.1354
		0.1392	0.1396	0.1337	0.1422	0.1322	0.1349	0.1345	0.1349	0.1358	0.1383	0.1446	0.1376
6:50:00	37.00	0.1709	0.144	0.1381	0.1326	0.1343	0.1386	0.1378	0.1376	0.1597	0.1517	0.1566	0.1548
		0.1593	0.142	0.138	0.135	0.1392	0.1275	0.1341	0.1361	0.1424	0.1416	0.1414	0.138
		0.1481	0.1369	0.1315	0.1347	0.1395	0.1325	0.1307	0.1316	0.1329	0.1347	0.1319	0.1373
		0.1424	0.1387	0.1358	0.1275	0.1278	0.133	0.1263	0.1273	0.1327	0.1296	0.1352	0.1284
		0.142	0.136	0.1354	0.1341	0.1354	0.1365	0.1349	0.134	0.1306	0.1344	0.1355	0.1321
		0.1431	0.139	0.1378	0.1342	0.1315	0.1341	0.1309	0.1328	0.1365	0.1387	0.1322	0.1351
		0.1452	0.1371	0.1328	0.1354	0.135	0.1423	0.1326	0.1401	0.1331	0.1352	0.1376	0.1356
		0.1391	0.1395	0.1333	0.1421	0.132	0.1346	0.1345	0.1348	0.1357	0.1394	0.1446	0.1375
7:00:00	37.00	0.1681	0.1427	0.138	0.1328	0.1345	0.1384	0.1377	0.1375	0.1602	0.1509	0.1562	0.1543
		0.1591	0.1423	0.1373	0.1349	0.1391	0.1276	0.1342	0.1361	0.1418	0.1407	0.141	0.1376
		0.1485	0.1372	0.1314	0.1346	0.1392	0.1327	0.1307	0.1315	0.1328	0.1335	0.132	0.1369
		0.1426	0.1393	0.136	0.1292	0.1276	0.1323	0.1262	0.1272	0.1329	0.1282	0.135	0.1282
		0.1394	0.1363	0.1353	0.1341	0.1353	0.1363	0.1346	0.134	0.1305	0.1333	0.1361	0.132
		0.1419	0.1384	0.1373	0.134	0.1315	0.1338	0.1307	0.133	0.1364	0.1368	0.1321	0.1351
		0.1432	0.1374	0.1324	0.1351	0.135	0.1424	0.1325	0.14	0.1333	0.134	0.1376	0.1353
		0.1386	0.1392	0.1334	0.142	0.1319	0.1347	0.1347	0.135	0.1359	0.1384	0.1445	0.1374
7:10:00	37.00	0.1654	0.1426	0.1378	0.1329	0.1346	0.1382	0.1376	0.1375	0.16	0.1491	0.1548	0.1535
		0.159	0.1416	0.1375	0.1345	0.139	0.1272	0.1339	0.136	0.1418	0.1397	0.1408	0.1375
		0.1469	0.136	0.131	0.1346	0.1391	0.1323	0.1305	0.1316	0.1324	0.133	0.1317	0.1366
		0.1405	0.1387	0.1356	0.1271	0.1274	0.132	0.1263	0.1272	0.1328	0.1284	0.1351	0.1283
		0.1394	0.1353	0.1352	0.1339	0.1352	0.1365	0.1346	0.134	0.1302	0.1331	0.1361	0.1323
		0.1427	0.138	0.1372	0.1339	0.1313	0.134	0.1307	0.1329	0.1365	0.1366	0.132	0.1349
		0.144	0.1368	0.1323	0.1351	0.135	0.1424	0.1325	0.1399	0.1332	0.134	0.1376	0.1353
		0.1381	0.1389	0.1333	0.142	0.1319	0.1348	0.1346	0.1349	0.1358	0.1383	0.1445	0.138
7:20:00	37.00	0.17	0.1429	0.1372	0.1327	0.1343	0.1383	0.1379	0.137	0.1572	0.1504	0.1548	0.1527
		0.1566	0.1415	0.137	0.1345	0.1389	0.1274	0.134	0.136	0.1415	0.1397	0.1402	0.1384
		0.1474	0.136	0.1307	0.1345	0.1389	0.1324	0.1305	0.1315	0.1324	0.1331	0.1316	0.1368
		0.1406	0.1382	0.1354	0.1273	0.1275	0.1321	0.1265	0.1272	0.1325	0.1283	0.1348	0.1281
		0.1385	0.1353	0.1349	0.1337	0.1351	0.1361	0.1346	0.1338	0.1301	0.1331	0.1355	0.1322
		0.1411	0.1378	0.1373	0.1338	0.1313	0.1339	0.1306	0.1329	0.1363	0.1365	0.1322	0.1345
		0.1427	0.1371	0.1324	0.135	0.1346	0.1425	0.1327	0.1398	0.133	0.1339	0.1374	0.1352
		0.138	0.1385	0.133	0.1417	0.1321	0.1346	0.1344	0.1349	0.1358	0.1395	0.1444	0.1374
7:30:00	37.00	0.1651	0.1418	0.1372	0.1326	0.1342	0.1379	0.1376	0.1371	0.1569	0.1482	0.1542	0.1514
		0.1549	0.1405	0.1366	0.1343	0.1389	0.1275	0.1338	0.1359	0.1411	0.1396	0.141	0.1372
		0.1455	0.1363	0.1308	0.1343	0.139	0.1328	0.1305	0.1315	0.1321	0.1331	0.1326	0.1363
		0.1395	0.1381	0.1352	0.127	0.1275	0.1319	0.126	0.1271	0.1321	0.1282	0.136	0.1277
		0.138	0.1348	0.1348	0.1337	0.1351	0.1362	0.1346	0.1338	0.1303	0.1331	0.1369	0.1317
		0.1414	0.1376	0.1369	0.1339	0.1311	0.134	0.1307	0.1328	0.1364	0.1366	0.1332	0.1347
		0.1427	0.1365	0.132	0.135	0.1348	0.1423	0.1322	0.1398	0.1331	0.1339	0.1388	0.1353
		0.1375	0.1387	0.1328	0.1415	0.1316	0.1347	0.1346	0.135	0.1358	0.1383	0.1456	0.1374
7:40:00	37.00	0.1632	0.142	0.137	0.1327	0.1341	0.1378	0.1376	0.1369	0.1555	0.1496	0.1535	0.1511
		0.1567	0.1406	0.1368	0.1342	0.1386	0.1273	0.1339	0.1359	0.1406	0.1391	0.1399	0.1365
		0.1444	0.1349	0.1303	0.1341	0.139	0.1324	0.1305	0.1314	0.1321	0.1328	0.1313	0.136
		0.1387	0.1486	0.1349	0.1267	0.1273	0.1316	0.126	0.1271	0.1322	0.1285	0.1346	0.1279
		0.1387	0.1354	0.1346	0.1338	0.1348	0.1363	0.1347	0.1337	0.1309	0.1329	0.1354	0.1321
		0.1396	0.1375	0.1367	0.1335	0.1312	0.1338	0.1308	0.1328	0.1362	0.1368	0.132	0.1347
		0.1427	0.1364	0.1318	0.1347	0.1348	0.1423	0.1323	0.1398	0.1331	0.1339	0.1378	0.1351
		0.1366	0.1383	0.1327	0.1414	0.1317	0.1346	0.1346	0.135	0.1358	0.1381	0.1446	0.1375
7:50:00	37.00	0.1618	0.1407	0.1374	0.1324	0.1341	0.1381	0.1376	0.137	0.1558	0.1478	0.1536	0.1507
		0.1546	0.1397	0.1366	0.1343	0.1386	0.1273	0.1341	0.1357	0.1406	0.1389	0.1396	0.136
		0.1449	0.1345	0.1305	0.1338	0.1389	0.1323	0.1309	0.1314	0.1323	0.1328	0.1311	0.1424
		0.1385	0.1371	0.1346	0.127	0.127	0.1317	0.1262	0.127	0.1321	0.1284	0.1347	0.128
		0.1373	0.1346	0.1343	0.1336	0.1349	0.1361	0.1346	0.1338	0.1301	0.1329	0.1356	0.132
		0.1401	0.1377	0.1366	0.1335	0.131	0.1344	0.1308	0.1329	0.1363	0.1365	0.132	0.1346
		0.1414	0.1362	0.1318	0.1346	0.1346	0.1423	0.1324	0.1399	0.133	0.1338	0.1374	0.1354
		0.1362	0.138	0.1326	0.1411	0.1317	0.1345	0.1346	0.135	0.1357	0.1382	0.1445	0.1373
8:00:00	37.00	0.1611	0.1407	0.1367	0.1325	0.1342	0.1382	0.1376	0.1369	0.1557	0.1486	0.1524	0.1502
		0.1548	0.1396	0.1363	0.1341	0.1386	0.1272	0.1338	0.1359	0.1413	0.1389	0.1397	0.1367
		0.1433	0.1344	0.1302	0.1338	0.1386	0.1322	0.1307	0.1314	0.1333	0.1325	0.131	0.136
		0.1379	0.1369	0.1346	0.1268	0.127	0.1314	0.1261	0.127	0.1333	0.1283	0.1343	0.1279
		0.1369	0.1343	0.1345	0.1335	0.1348	0.1364	0.1348	0.1337	0.1313	0.133	0.1356	0.1319
		0.1391	0.1373	0.1364	0.1334	0.131	0.1337	0.1308	0.1329	0.1372	0.1364	0.132	0.1346
		0.141	0.1359	0.1317	0.1346	0.1347	0.1421	0.1322	0.1397	0.1342	0.1338	0.1375	0.135
		0.1361	0.138	0.1326	0.1411	0.1318	0.1345	0.1346	0.135	0.1371	0.1382	0.1445	0.1374
8:10:00	37.00	0.1625	0.1416	0.137	0.1329	0.1343	0.1389	0.1377	0.1381	0.154	0.1469	0.1521	0.1498
		0.1535	0.1397	0.1361	0.134	0.1384	0.1274	0.1338	0.1368	0.1397	0.1388	0.1391	0.1356
		0.1433	0.1352	0.1302	0.1338	0.1387	0.1322	0.1306	0.1325	0.1318	0.1322	0.131	0.1362
		0.1377	0.1455	0.1347	0.1266	0.127	0.1319	0.1261	0.1282	0.1321	0.1281	0.1345	0.1277
		0.1367	0.1343	0.1342	0.1336	0.1347	0.1359	0.1346	0.1351	0.1301	0.133	0.1356	0.1321
		0.1392	0.1366	0.1364	0.1332	0.131	0.1338	0.1309	0.1342	0.1359	0.1365	0.1322	0.1346
		0.1403	0.1359	0.1315	0.1345	0.1345	0.1423	0.1322	0.141	0.1329	0.1338	0.1374	0.1351
		0.136	0.1382	0.1327	0.1412	0.132	0.1343	0.1347	0.1362	0.1356	0.1382	0.1445	0.1373
8:20:00	37.00	0.1587	0.1411	0.1363	0.1322	0.1339	0.138	0.1375	0.1369	0.1529	0.1459	0.1516	0.149
		0.1521	0.1394	0.1361	0.1338	0.1385	0.1272	0.134	0.1357	0.14	0.1384	0.1385	0.1359
		0.1416	0.1348	0.1301	0.1338	0.1387	0.1323	0.1306	0.1313	0.1316	0.1323	0.131	0.1356
		0.1368	0.1364	0.1343	0.1265	0.1268	0.1312	0.1261	0.127	0.1319	0.1278	0.1342	0.1278
		0.136	0.1341	0.1341	0.1334	0.1346	0.1362	0.1346	0.1338	0.1329	0.1328	0.1354	0.1321
		0.1391	0.1368	0.1361	0.1332	0.1309	0.1336	0.1309	0.1329	0.1359	0.1365	0.1318	0.1345
		0.1402	0.1355	0.1313	0.1346	0.1345	0.1423	0.1324	0.1397	0.1331	0.1338	0.1374	0.1352
		0.1353	0.1374	0.1325	0.141	0.1317	0.1343	0.1345	0.1352	0.1358	0.1383	0.1448	0.1375
8:30:00	37.00	0.1591	0.1407	0.1359	0.1323	0.134	0.138	0.1376	0.1369	0.1539	0.1459	0.1506	0.1492
		0.1503	0.1388	0.136	0.1337	0.1385	0.1272	0.1341	0.1356	0.1398	0.1382	0.1388	0.1353
		0.1412	0.1336	0.1297	0.1336	0.1387	0.132	0.1306	0.1313	0.1316	0.1323	0.131	0.1357
		0.1368	0.1367	0.1342	0.1265	0.1268	0.1313	0.1258	0.1271	0.132	0.128	0.1342	0.1276
		0.1355	0.1341	0.134	0.1333	0.1348	0.136	0.1346	0.1339	0.1299	0.1331	0.1353	0.1318
		0.1385	0.1365	0.1357	0.1333	0.1307	0.1336	0.131	0.1331	0.1358	0.1364	0.1319	0.1345
		0.1406	0.1354	0.1313	0.1344	0.1347	0.1421	0.1323	0.1397	0.1331	0.1337	0.1375	0.1353
		0.135	0.1382	0.1322	0.1407	0.1316	0.1345	0.1347	0.1351	0.1357	0.1384	0.1448	0.1375
8:40:00	37.00	0.1568	0.1406	0.1361	0.1321	0.1339	0.138	0.1377	0.1368	0.1527	0.1458	0.1505	0.1495
		0.1512	0.1383	0.1359	0.1337	0.1382	0.1273	0.134	0.1356	0.1395	0.1377	0.1384	0.1364
		0.1414	0.1335	0.13	0.1335	0.1385	0.1322	0.1306	0.1313	0.1314	0.1323	0.1307	0.1367
		0.1353	0.1365	0.134	0.1263	0.1268	0.1315	0.126	0.1268	0.1314	0.1279	0.1341	0.1292
		0.1356	0.1337	0.1339	0.1332	0.1345	0.1362	0.1347	0.1339	0.1299	0.1328	0.135	0.1329
		0.1377	0.1363	0.1357	0.1332	0.1308	0.1337	0.1311	0.1331	0.1359	0.1364	0.132	0.1355
		0.1391	0.1351	0.1312	0.1343	0.1343	0.1421	0.1324	0.1397	0.1329	0.1337	0.1375	0.1364
		0.1348	0.1372	0.1322	0.1407	0.1318	0.1345	0.135	0.1353	0.1359	0.1383	0.145	0.139
8:50:00	37.00	0.1556	0.1415	0.1361	0.132	0.1339	0.1382	0.1377	0.1368	0.1521	0.1472	0.1516	0.1473
		0.149	0.1383	0.1356	0.1337	0.1384	0.1272	0.134	0.1355	0.1393	0.1387	0.1382	0.1353
		0.1405	0.1348	0.1298	0.1335	0.1384	0.1323	0.1309	0.1311	0.1313	0.1329	0.1305	0.1354
		0.1352	0.1358	0.1341	0.1266	0.1269	0.1313	0.1261	0.1269	0.1314	0.1289	0.1337	0.1275
		0.1353	0.1336	0.1337	0.1331	0.1345	0.1359	0.1346	0.134	0.1298	0.1339	0.1352	0.1317
		0.1379	0.136	0.1358	0.133	0.1307	0.1334	0.1313	0.1333	0.1357	0.1375	0.1319	0.1346
		0.1386	0.1351	0.1311	0.1343	0.1343	0.142	0.1326	0.1397	0.1332	0.1349	0.1376	0.1355
		0.1347	0.1376	0.1321	0.1405	0.1317	0.1346	0.1348	0.1354	0.1361	0.1395	0.1451	0.1376
9:00:00	37.00	0.1569	0.1396	0.1358	0.1323	0.1339	0.1402	0.1375	0.1367	0.1508	0.1447	0.1493	0.1473
		0.1483	0.1393	0.1357	0.1338	0.1382	0.1274	0.1341	0.1354	0.1388	0.1375	0.1382	0.1347
		0.1401	0.134	0.1297	0.1332	0.1384	0.132	0.1306	0.1311	0.1311	0.1319	0.1304	0.1354
		0.136	0.1358	0.1339	0.1261	0.1266	0.1312	0.1259	0.1267	0.1315	0.1278	0.1342	0.1276
		0.1352	0.1337	0.1338	0.133	0.1345	0.1361	0.1347	0.134	0.1298	0.1327	0.1352	0.1317
		0.1377	0.1359	0.1356	0.1332	0.131	0.1333	0.1314	0.1335	0.1359	0.1363	0.1319	0.1345
		0.1385	0.1351	0.1311	0.1342	0.1342	0.1422	0.1325	0.1398	0.1333	0.1339	0.1377	0.1352
		0.134	0.1372	0.1319	0.1403	0.1316	0.1347	0.1352	0.1356	0.1362	0.1384	0.1455	0.1382
9:10:00	37.00	0.1558	0.1395	0.1356	0.1321	0.1337	0.1384	0.1375	0.1373	0.1505	0.1445	0.1489	0.1468
		0.1502	0.1379	0.1355	0.1335	0.1379	0.1275	0.1342	0.1356	0.1387	0.1372	0.1408	0.1358
		0.1396	0.1331	0.1292	0.1331	0.1383	0.132	0.1307	0.1312	0.1311	0.1316	0.1306	0.1354
		0.1349	0.1361	0.1334	0.1261	0.1265	0.1312	0.1262	0.1267	0.1313	0.1277	0.1338	0.1274
		0.1352	0.1333	0.1336	0.1331	0.1345	0.1361	0.1348	0.1342	0.1298	0.133	0.1349	0.1315
		0.1366	0.1359	0.1355	0.133	0.1309	0.1334	0.1317	0.1338	0.1356	0.1364	0.132	0.1345
		0.1378	0.1349	0.1308	0.134	0.1342	0.1423	0.1324	0.14	0.1334	0.1339	0.1377	0.1356
		0.134	0.1368	0.1319	0.1402	0.1315	0.1347	0.1354	0.1359	0.1364	0.1386	0.1456	0.1381
9:20:00	37.00	0.156	0.1398	0.1354	0.1319	0.1339	0.1385	0.1378	0.1366	0.15	0.1441	0.1493	0.1472
		0.1473	0.1377	0.1351	0.1332	0.1382	0.1273	0.1343	0.1354	0.1385	0.1373	0.1384	0.1344
		0.1392	0.1337	0.1292	0.1329	0.1386	0.1322	0.1308	0.1311	0.1314	0.1318	0.1307	0.1349
		0.1344	0.1352	0.1333	0.126	0.1265	0.1314	0.1262	0.1268	0.1313	0.1281	0.1337	0.1274
		0.1342	0.1333	0.1342	0.1329	0.1344	0.1363	0.1351	0.1343	0.1296	0.1324	0.135	0.1315
		0.1364	0.1358	0.1355	0.1328	0.1307	0.1336	0.132	0.134	0.1361	0.1367	0.132	0.1346
		0.139	0.1348	0.1309	0.1341	0.1342	0.1424	0.1326	0.1402	0.1334	0.1341	0.138	0.1354
		0.1341	0.1366	0.1316	0.1402	0.1317	0.1348	0.1354	0.1365	0.1368	0.1391	0.1463	0.1382
9:30:00	37.00	0.153	0.1388	0.1353	0.1317	0.1337	0.1384	0.138	0.1367	0.15	0.1442	0.1493	0.146
		0.1469	0.1379	0.1351	0.1334	0.1378	0.1276	0.1344	0.1353	0.1383	0.137	0.139	0.1344
		0.1389	0.1326	0.1292	0.133	0.1381	0.1319	0.1309	0.1311	0.1308	0.1317	0.1314	0.1348
		0.1348	0.1358	0.1334	0.1259	0.1264	0.1312	0.1261	0.1267	0.1312	0.1275	0.1347	0.1272
		0.134	0.1327	0.1334	0.133	0.1344	0.1364	0.135	0.135	0.1298	0.1324	0.1363	0.1317
		0.1372	0.1355	0.1352	0.1329	0.1307	0.1335	0.1324	0.1343	0.1357	0.1368	0.1331	0.1346
		0.1383	0.1344	0.1304	0.134	0.1342	0.1424	0.1329	0.1404	0.1335	0.1343	0.1394	0.1358
		0.1335	0.1363	0.1317	0.1401	0.1319	0.1348	0.1358	0.1364	0.1369	0.1393	0.1476	0.1394
9:40:00	37.00	0.1531	0.1387	0.135	0.1319	0.1339	0.1384	0.138	0.1365	0.1495	0.1434	0.1629	0.1465
		0.1456	0.1372	0.1349	0.1332	0.1378	0.1275	0.135	0.1354	0.1378	0.1369	0.1374	0.1343
		0.1378	0.1323	0.1302	0.133	0.1384	0.1318	0.1312	0.131	0.1307	0.1316	0.1304	0.1346
		0.1337	0.1345	0.1331	0.1258	0.1263	0.1312	0.1262	0.1266	0.1311	0.1276	0.1337	0.1273
		0.1338	0.1329	0.1333	0.1327	0.1345	0.1364	0.1352	0.1351	0.1297	0.1325	0.1349	0.1317
		0.1366	0.1354	0.1353	0.1328	0.1308	0.1335	0.1329	0.1348	0.1358	0.137	0.1326	0.1347
		0.1373	0.1345	0.1307	0.1339	0.1342	0.1427	0.133	0.1404	0.1337	0.1345	0.1383	0.1359
		0.1332	0.1361	0.1316	0.1399	0.1319	0.135	0.1361	0.1369	0.1375	0.1397	0.1474	0.1386
9:50:00	37.00	0.1518	0.1397	0.135	0.1318	0.1337	0.1385	0.1393	0.1366	0.149	0.1434	0.1475	0.1455
		0.1448	0.1389	0.1347	0.1332	0.1378	0.1275	0.136	0.1352	0.1379	0.1355	0.1373	0.1343
		0.1378	0.1322	0.1289	0.1328	0.1382	0.1321	0.1328	0.131	0.1308	0.1313	0.1315	0.1347
		0.1331	0.1356	0.1329	0.1295	0.1263	0.1311	0.1275	0.1266	0.131	0.1274	0.1334	0.1272
		0.1337	0.1328	0.1332	0.1328	0.1342	0.1364	0.1367	0.1355	0.1297	0.1323	0.1349	0.1316
		0.1365	0.1354	0.1351	0.1328	0.1309	0.1337	0.1345	0.1352	0.1359	0.137	0.1325	0.1348
		0.1372	0.135	0.1304	0.1337	0.1346	0.1426	0.1344	0.1409	0.1339	0.1348	0.1387	0.1365
		0.1332	0.1362	0.1315	0.1398	0.1319	0.1354	0.1376	0.1373	0.1381	0.1401	0.1478	0.1389
10:00:00	37.00	0.1525	0.1386	0.1352	0.1317	0.1339	0.1391	0.1395	0.1365	0.1485	0.1428	0.1475	0.1452
		0.144	0.1368	0.1347	0.133	0.1379	0.1277	0.1365	0.1351	0.1377	0.1355	0.1373	0.1342
		0.1376	0.1319	0.1289	0.1329	0.1381	0.132	0.133	0.1309	0.1305	0.1314	0.1299	0.1344
		0.1325	0.1342	0.1329	0.1258	0.1263	0.1309	0.1277	0.1265	0.131	0.1273	0.1334	0.1272
		0.1334	0.1326	0.1331	0.1326	0.1343	0.1367	0.1369	0.136	0.1297	0.1324	0.1351	0.1318
		0.1356	0.135	0.135	0.1326	0.1311	0.1336	0.1353	0.1356	0.1359	0.1374	0.1326	0.135
		0.137	0.134	0.1303	0.1338	0.1343	0.143	0.1347	0.1411	0.1341	0.135	0.1391	0.1367
		0.133	0.1367	0.1315	0.1398	0.1318	0.1357	0.1381	0.1381	0.1387	0.1407	0.1487	0.1393
10:10:00	37.00	0.1514	0.1384	0.1352	0.1317	0.1337	0.1406	0.1385	0.1365	0.1481	0.1435	0.1481	0.1449
		0.1464	0.1373	0.1346	0.1329	0.1377	0.1278	0.1357	0.1351	0.137	0.1372	0.1385	0.1337
		0.1371	0.1318	0.1288	0.1326	0.1381	0.1322	0.1319	0.131	0.1303	0.1323	0.1311	0.1344
		0.1325	0.1341	0.1328	0.1258	0.1262	0.1311	0.1265	0.1265	0.131	0.1293	0.1345	0.1273
		0.1331	0.1323	0.1331	0.1325	0.1344	0.1369	0.1362	0.1366	0.1299	0.1337	0.1361	0.1318
		0.1354	0.135	0.1348	0.1323	0.1309	0.1338	0.1351	0.1363	0.136	0.1385	0.1339	0.1352
		0.137	0.1341	0.1302	0.1337	0.1344	0.1431	0.134	0.1417	0.1346	0.1366	0.1405	0.1373
		0.1329	0.1357	0.1314	0.1394	0.1318	0.1358	0.1375	0.1386	0.1393	0.1424	0.1507	0.1398
10:20:00	37.00	0.1522	0.1385	0.1353	0.1321	0.1339	0.1395	0.1391	0.1364	0.1479	0.142	0.1491	0.1444
		0.1443	0.1372	0.1343	0.1328	0.1379	0.1282	0.1364	0.1351	0.1371	0.1362	0.1386	0.1337
		0.1369	0.1318	0.1289	0.1328	0.1382	0.1323	0.1324	0.1309	0.1306	0.131	0.1311	0.1341
		0.1321	0.1394	0.1326	0.1258	0.1264	0.1322	0.1266	0.1264	0.1307	0.1274	0.1344	0.1271
		0.1331	0.1325	0.1336	0.1326	0.1344	0.1371	0.1367	0.1373	0.1299	0.1325	0.1364	0.1318
		0.1357	0.1346	0.1347	0.1325	0.131	0.1338	0.1361	0.137	0.1365	0.1376	0.1342	0.1353
		0.1361	0.1337	0.1302	0.1336	0.1344	0.1438	0.1343	0.1422	0.1349	0.136	0.1413	0.1374
		0.1325	0.1359	0.1313	0.1395	0.1327	0.1362	0.1383	0.1396	0.1404	0.1419	0.1518	0.1406
10:30:00	37.00	0.1501	0.1385	0.1348	0.1328	0.1337	0.1397	0.1397	0.1364	0.1476	0.1428	0.1484	0.1442
		0.1423	0.136	0.1341	0.1327	0.1377	0.1288	0.137	0.135	0.1376	0.1373	0.1367	0.1335
		0.1363	0.1315	0.1288	0.1329	0.1382	0.1323	0.1328	0.1309	0.1304	0.1323	0.1298	0.1343
		0.1318	0.1334	0.1326	0.1255	0.1261	0.1311	0.1267	0.1267	0.1306	0.1281	0.1334	0.1271
		0.1325	0.1324	0.1328	0.1324	0.1343	0.1375	0.1373	0.1386	0.1301	0.1338	0.1351	0.1317
		0.1349	0.1345	0.1347	0.1325	0.1309	0.1343	0.1372	0.1392	0.1365	0.1394	0.1333	0.1357
		0.1359	0.1336	0.1302	0.1335	0.1345	0.1441	0.1346	0.143	0.1354	0.1376	0.1408	0.138
		0.1325	0.1354	0.1311	0.1393	0.1326	0.1366	0.1393	0.1404	0.1416	0.1443	0.1521	0.1412
10:40:00	37.00	0.1527	0.1384	0.1348	0.1319	0.134	0.1404	0.1399	0.1363	0.1475	0.1417	0.1461	0.1438
		0.1417	0.1365	0.1343	0.1327	0.1379	0.1288	0.1376	0.1351	0.137	0.1363	0.1368	0.1337
		0.1364	0.1326	0.1285	0.1326	0.1384	0.1325	0.1337	0.131	0.1304	0.131	0.1294	0.1342
		0.1314	0.1367	0.1326	0.1254	0.126	0.1312	0.1272	0.1264	0.1308	0.127	0.1331	0.1272
		0.1323	0.1321	0.1328	0.1323	0.1345	0.1378	0.138	0.1397	0.1301	0.1325	0.1354	0.1318
		0.1348	0.1342	0.1345	0.1325	0.1313	0.1346	0.1385	0.1391	0.1368	0.1385	0.1335	0.1363
		0.1354	0.1339	0.1299	0.1337	0.1346	0.1445	0.1355	0.1439	0.136	0.1374	0.1418	0.1389
		0.1321	0.1352	0.1311	0.1393	0.1326	0.1373	0.14	0.1418	0.1428	0.1444	0.1536	0.1419
10:50:00	37.00	0.1524	0.138	0.1345	0.1317	0.134	0.1407	0.1402	0.1363	0.1471	0.1415	0.1525	0.1443
		0.1421	0.136	0.1338	0.1325	0.1378	0.1295	0.1387	0.1349	0.1369	0.1357	0.1374	0.1344
		0.1357	0.1314	0.1285	0.1324	0.1383	0.1329	0.1342	0.1308	0.13	0.131	0.1306	0.135
		0.1313	0.1352	0.1324	0.1254	0.126	0.1312	0.1275	0.1264	0.1307	0.1269	0.1343	0.1283
		0.1322	0.132	0.1324	0.1323	0.1344	0.1383	0.139	0.1414	0.1303	0.1323	0.1365	0.1328
		0.1347	0.1341	0.1344	0.1324	0.1312	0.1344	0.1407	0.1404	0.1369	0.1388	0.1361	0.1378
		0.1348	0.1336	0.13	0.1336	0.1347	0.145	0.1362	0.1449	0.1366	0.1382	0.144	0.141
		0.1319	0.1352	0.131	0.1393	0.1326	0.1381	0.1414	0.1434	0.1445	0.1455	0.1564	0.1442
11:00:00	37.00	0.1489	0.1377	0.1347	0.1315	0.1341	0.141	0.1404	0.1363	0.1473	0.1412	0.1464	0.1446
		0.1412	0.1358	0.1339	0.1325	0.1379	0.1297	0.1396	0.1349	0.1364	0.1354	0.1373	0.1345
		0.1361	0.1312	0.1285	0.1322	0.1381	0.1329	0.1353	0.1308	0.1301	0.1308	0.1307	0.1351
		0.1311	0.1342	0.1322	0.1253	0.1259	0.131	0.1279	0.1263	0.1306	0.1277	0.1344	0.128
		0.1318	0.1318	0.1324	0.1323	0.1361	0.1387	0.1402	0.1433	0.1305	0.1326	0.1367	0.133
		0.1349	0.1346	0.1343	0.1323	0.132	0.1348	0.143	0.1423	0.1372	0.1398	0.1358	0.1381
		0.1351	0.1334	0.13	0.1334	0.135	0.1458	0.1371	0.1463	0.1376	0.1392	0.1452	0.1417
		0.1319	0.1351	0.1308	0.1391	0.1336	0.1387	0.1431	0.1452	0.1467	0.1473	0.159	0.1457
11:10:00	37.00	0.1499	0.1377	0.1346	0.1312	0.134	0.1418	0.1416	0.1363	0.1461	0.1407	0.1448	0.1444
		0.1405	0.1356	0.1341	0.1325	0.1379	0.1304	0.141	0.1348	0.1367	0.1352	0.1363	0.1344
		0.135	0.1307	0.1284	0.1323	0.1381	0.133	0.136	0.1307	0.1299	0.1306	0.1292	0.1351
		0.1305	0.1465	0.1323	0.1253	0.1259	0.1316	0.1281	0.1264	0.1306	0.1269	0.1331	0.1281
		0.1321	0.1315	0.1323	0.1323	0.1357	0.1395	0.1417	0.1456	0.1307	0.1327	0.1354	0.1333
		0.1341	0.134	0.1342	0.1324	0.132	0.1352	0.1456	0.1438	0.1375	0.1405	0.1351	0.1391
		0.1352	0.1333	0.1296	0.1335	0.1351	0.1466	0.138	0.1478	0.1384	0.1404	0.1458	0.1429
		0.1316	0.1351	0.1309	0.139	0.135	0.1397	0.145	0.1473	0.1491	0.1495	0.1602	0.147
11:20:00	37.00	0.1477	0.1375	0.1345	0.1313	0.1342	0.1427	0.1421	0.1361	0.1463	0.1406	0.1479	0.1428
		0.1401	0.1358	0.1339	0.1325	0.138	0.1313	0.1427	0.1349	0.1364	0.1354	0.1361	0.1332
		0.1351	0.1307	0.1284	0.1324	0.1383	0.1336	0.1374	0.1306	0.1301	0.1306	0.1293	0.1339
		0.1305	0.1329	0.132	0.1253	0.1258	0.1315	0.1289	0.1262	0.1304	0.1268	0.133	0.1269
		0.1319	0.1316	0.1323	0.1323	0.1351	0.1403	0.1433	0.1484	0.1312	0.1329	0.1352	0.1322
		0.1341	0.134	0.134	0.1322	0.1324	0.1356	0.1492	0.1455	0.1383	0.1418	0.1361	0.1385
		0.1348	0.1338	0.1298	0.1338	0.1355	0.1478	0.1395	0.1497	0.1399	0.1424	0.1475	0.1435
		0.1317	0.1355	0.1308	0.1389	0.1338	0.141	0.1472	0.1499	0.1524	0.1518	0.1632	0.1478
11:30:00	37.00	0.1485	0.1371	0.1344	0.1313	0.1343	0.1437	0.1445	0.1362	0.1458	0.1402	0.1459	0.1435
		0.1394	0.135	0.1336	0.1323	0.1379	0.1325	0.1457	0.1347	0.1381	0.1352	0.137	0.1341
		0.1346	0.131	0.1281	0.1322	0.1384	0.134	0.1404	0.1306	0.1299	0.1306	0.1306	0.1347
		0.1305	0.1339	0.132	0.1252	0.1259	0.132	0.1308	0.1263	0.1305	0.1269	0.1342	0.1281
		0.1315	0.1316	0.1321	0.1323	0.1385	0.1414	0.1468	0.1521	0.1315	0.1332	0.137	0.1336
		0.134	0.1337	0.1337	0.1323	0.1328	0.1362	0.1539	0.1484	0.1389	0.1427	0.1379	0.1408
		0.1352	0.1332	0.1296	0.1335	0.1358	0.1489	0.1424	0.152	0.1412	0.1441	0.151	0.1461
		0.1314	0.1348	0.1304	0.1391	0.1343	0.1421	0.1506	0.1531	0.1556	0.1549	0.1676	0.1509
11:40:00	37.00	0.1483	0.1367	0.1339	0.1309	0.1354	0.1448	0.1459	0.1371	0.1457	0.14	0.1466	0.1431
		0.1397	0.1351	0.1332	0.1323	0.1394	0.1334	0.1483	0.1358	0.1364	0.1348	0.1358	0.134
		0.1343	0.1303	0.1279	0.1319	0.1394	0.1344	0.1423	0.1317	0.1297	0.1304	0.129	0.1346
		0.1299	0.1319	0.1319	0.125	0.1272	0.1319	0.1313	0.1274	0.1304	0.1267	0.1329	0.128
		0.1314	0.1313	0.1322	0.1323	0.1371	0.1424	0.1496	0.1574	0.132	0.1333	0.1361	0.1336
		0.134	0.1341	0.1339	0.1325	0.1345	0.1369	0.1579	0.152	0.1397	0.1441	0.1379	0.1418
		0.1348	0.1329	0.1296	0.1335	0.1381	0.1501	0.1442	0.1559	0.1434	0.1463	0.1526	0.1481
		0.1309	0.1346	0.1305	0.139	0.1361	0.1439	0.154	0.1577	0.16	0.1584	0.171	0.1535
11:50:00	37.00	0.1463	0.1367	0.1338	0.131	0.1345	0.1463	0.1463	0.1361	0.1449	0.1399	0.1443	0.142
		0.1398	0.1348	0.1335	0.1322	0.1383	0.1351	0.1492	0.1346	0.136	0.1346	0.1355	0.133
		0.1341	0.1304	0.1277	0.1321	0.1385	0.1351	0.1437	0.1306	0.1296	0.1304	0.1288	0.1332
		0.13	0.1324	0.1318	0.1251	0.1259	0.1327	0.1316	0.1262	0.1305	0.1267	0.1328	0.127
		0.131	0.1313	0.1321	0.1324	0.1362	0.1439	0.1511	0.1614	0.1326	0.1337	0.1365	0.1327
		0.1336	0.1338	0.1338	0.1324	0.1339	0.1379	0.1617	0.1546	0.1405	0.1459	0.1391	0.1421
		0.134	0.1328	0.1294	0.1338	0.1365	0.1522	0.1452	0.1584	0.1452	0.1489	0.1561	0.1499
		0.131	0.1346	0.1302	0.1386	0.1356	0.1457	0.1562	0.1609	0.1647	0.163	0.1752	0.1553
12:00:00	37.00	0.1474	0.137	0.1343	0.1311	0.1348	0.1487	0.1491	0.1372	0.1457	0.1394	0.1469	0.1416
		0.1395	0.1354	0.1334	0.1323	0.1387	0.1374	0.1544	0.136	0.1359	0.1346	0.1356	0.1327
		0.1339	0.1305	0.1281	0.1323	0.1386	0.1367	0.148	0.1318	0.1294	0.1305	0.1291	0.1333
		0.1296	0.1331	0.1315	0.125	0.1259	0.134	0.1335	0.1274	0.1304	0.1268	0.133	0.1269
		0.1307	0.1311	0.1319	0.1323	0.1368	0.1464	0.1563	0.1687	0.1333	0.1339	0.1364	0.1332
		0.1333	0.1331	0.1336	0.1323	0.1347	0.1395	0.1687	0.1596	0.1415	0.148	0.1407	0.1437
		0.1343	0.1328	0.1294	0.1337	0.1374	0.155	0.1491	0.1633	0.1474	0.1523	0.16	0.1529
		0.1311	0.1342	0.1304	0.1387	0.1365	0.1491	0.1615	0.1666	0.1709	0.1678	0.1809	0.1589
12:10:00	37.00	0.1465	0.1367	0.1341	0.1313	0.1353	0.1508	0.1514	0.1362	0.1452	0.1399	0.1535	0.1415
		0.1382	0.1347	0.1333	0.1321	0.139	0.1394	0.1578	0.1346	0.1356	0.1345	0.1355	0.1326
		0.134	0.1302	0.1277	0.1321	0.139	0.1379	0.1514	0.1306	0.1294	0.1302	0.1289	0.1334
		0.129	0.1318	0.1315	0.1248	0.1259	0.1343	0.1352	0.1262	0.1305	0.1268	0.1329	0.1269
		0.1311	0.1309	0.1317	0.1321	0.1378	0.1486	0.1605	0.1749	0.1343	0.134	0.1372	0.1335
		0.1332	0.1333	0.1336	0.1323	0.1357	0.1409	0.1756	0.1637	0.1427	0.1503	0.1424	0.1457
		0.1338	0.1328	0.1294	0.1338	0.138	0.1579	0.1524	0.167	0.1508	0.156	0.1645	0.1569
		0.1309	0.1344	0.1304	0.1386	0.1376	0.1517	0.1658	0.1715	0.1773	0.1738	0.1871	0.1632
12:20:00	37.00	0.1459	0.1366	0.1335	0.1314	0.1353	0.1529	0.1529	0.1361	0.1441	0.1403	0.1438	0.1413
		0.1378	0.1342	0.1333	0.1321	0.1394	0.1414	0.1614	0.1346	0.1357	0.1357	0.1352	0.1323
		0.1337	0.13	0.1277	0.1322	0.1392	0.1386	0.1547	0.1304	0.1292	0.1313	0.1288	0.133
		0.1294	0.132	0.1315	0.1254	0.1261	0.1346	0.1354	0.126	0.1304	0.128	0.1329	0.1271
		0.1309	0.1307	0.1317	0.1322	0.1374	0.1505	0.1647	0.1826	0.1351	0.136	0.1375	0.1342
		0.133	0.1334	0.1334	0.1325	0.1369	0.1424	0.1816	0.1686	0.1442	0.1545	0.1456	0.148
		0.1341	0.1325	0.1293	0.134	0.1397	0.1608	0.155	0.1724	0.1541	0.1619	0.1695	0.1612
		0.1307	0.1342	0.1303	0.1386	0.1391	0.1547	0.1706	0.1776	0.1846	0.1819	0.1938	0.1681
12:30:00	37.00	0.1452	0.1362	0.1333	0.131	0.1356	0.1554	0.1557	0.136	0.1446	0.1391	0.1435	0.1413
		0.1376	0.134	0.1331	0.132	0.1394	0.1442	0.1662	0.1345	0.1355	0.1342	0.1351	0.1325
		0.1335	0.1298	0.1278	0.132	0.1393	0.1396	0.1603	0.1306	0.1292	0.1301	0.1287	0.1332
		0.1291	0.1324	0.1315	0.1264	0.1261	0.1355	0.1372	0.1261	0.1307	0.1265	0.1329	0.1273
		0.1306	0.1308	0.132	0.1323	0.1383	0.1537	0.1702	0.1922	0.1363	0.1356	0.1384	0.1348
		0.1327	0.1333	0.1335	0.1326	0.1379	0.1435	0.1905	0.1749	0.1459	0.1567	0.1469	0.1508
		0.1337	0.1325	0.1291	0.1341	0.1396	0.1642	0.1591	0.1783	0.1586	0.1657	0.1755	0.1665
		0.1306	0.1341	0.1301	0.1387	0.1406	0.1583	0.1772	0.1856	0.1938	0.1889	0.2007	0.1739
12:40:00	37.00	0.1465	0.1363	0.1345	0.1311	0.1362	0.1599	0.1607	0.136	0.1453	0.1391	0.1448	0.1407
		0.1373	0.134	0.1329	0.1321	0.1402	0.1457	0.1739	0.1345	0.1365	0.1344	0.1363	0.1326
		0.1332	0.1298	0.1274	0.1319	0.1398	0.1399	0.1676	0.1304	0.1305	0.1299	0.13	0.1363
		0.1289	0.134	0.1313	0.1248	0.1261	0.135	0.1408	0.126	0.132	0.1268	0.1344	0.1273
		0.1307	0.1306	0.1316	0.1323	0.1393	0.1553	0.1787	0.2039	0.1426	0.1361	0.1403	0.1357
		0.1327	0.133	0.1332	0.1326	0.1398	0.1442	0.1999	0.182	0.149	0.1613	0.151	0.1539
		0.133	0.1323	0.1291	0.1344	0.1411	0.1673	0.1658	0.1858	0.1644	0.1718	0.1834	0.173
		0.1303	0.1341	0.1301	0.1388	0.1428	0.1617	0.1856	0.193	0.2051	0.1985	0.2111	0.1799
12:50:00	37.00	0.1442	0.1362	0.1336	0.1313	0.1365	0.1624	0.165	0.136	0.1443	0.1386	0.143	0.1411
		0.1371	0.1338	0.1327	0.1319	0.1407	0.1502	0.182	0.1344	0.1361	0.1342	0.1351	0.1321
		0.1332	0.1298	0.1273	0.1317	0.14	0.1431	0.1742	0.1305	0.1303	0.13	0.1284	0.1328
		0.1285	0.1393	0.1314	0.1247	0.1262	0.1373	0.1435	0.1261	0.1321	0.1268	0.133	0.1279
		0.1302	0.1305	0.1313	0.1323	0.1406	0.1603	0.1865	0.218	0.141	0.1374	0.1403	0.1367
		0.1324	0.1335	0.1332	0.1327	0.1418	0.1482	0.2108	0.1905	0.1511	0.1666	0.1537	0.1584
		0.1339	0.1323	0.129	0.1345	0.1425	0.1748	0.1725	0.194	0.1707	0.179	0.1902	0.1801
		0.1301	0.1339	0.1299	0.1388	0.145	0.1686	0.1948	0.2023	0.216	0.2093	0.2201	0.1882
13:00:00	37.00	0.144	0.136	0.1334	0.1312	0.1384	0.1651	0.1701	0.1358	0.1436	0.1387	0.144	0.1417
		0.1373	0.1339	0.1327	0.1319	0.1428	0.1535	0.1896	0.1344	0.135	0.1343	0.1362	0.133
		0.1329	0.1295	0.1273	0.1317	0.1418	0.1439	0.1821	0.1304	0.1291	0.1296	0.1297	0.1341
		0.1284	0.131	0.1311	0.1248	0.1276	0.1369	0.1469	0.126	0.1309	0.1266	0.1345	0.1288
		0.1302	0.1302	0.1312	0.1323	0.1454	0.1625	0.1952	0.2333	0.142	0.1384	0.1426	0.1391
		0.1325	0.1327	0.133	0.1327	0.1453	0.1493	0.2236	0.2001	0.1532	0.172	0.159	0.1643
		0.1329	0.1322	0.129	0.1349	0.1454	0.1792	0.1796	0.2032	0.1766	0.1872	0.2002	0.1899
		0.1302	0.1338	0.1298	0.1389	0.1485	0.1725	0.2055	0.2102	0.228	0.2219	0.2325	0.1981
13:10:00	37.00	0.1449	0.1358	0.1334	0.1311	0.1378	0.1712	0.176	0.1358	0.144	0.1383	0.1441	0.1406
		0.1369	0.1335	0.1328	0.1319	0.1423	0.1592	0.1989	0.1344	0.1348	0.1341	0.136	0.1319
		0.1325	0.1294	0.1271	0.1318	0.1411	0.1476	0.191	0.1304	0.1291	0.1296	0.1297	0.1327
		0.1282	0.1341	0.1311	0.1245	0.1266	0.1394	0.1501	0.126	0.1311	0.1267	0.1349	0.1276
		0.1301	0.1303	0.1313	0.1326	0.1432	0.169	0.205	0.2507	0.1443	0.1396	0.1444	0.139
		0.1322	0.1326	0.133	0.1329	0.1465	0.1538	0.2371	0.2111	0.156	0.1793	0.1641	0.1679
		0.1328	0.1319	0.129	0.1351	0.1463	0.1872	0.1871	0.2116	0.1838	0.1967	0.2099	0.1986
		0.1299	0.1338	0.1299	0.1392	0.1502	0.1801	0.2167	0.2208	0.2412	0.2363	0.2443	0.2074
13:20:00	37.00	0.1438	0.1357	0.1334	0.131	0.1386	0.1769	0.1824	0.1357	0.1437	0.1382	0.1427	0.1403
		0.1366	0.1333	0.1327	0.1319	0.1437	0.1645	0.2103	0.1343	0.136	0.1335	0.1346	0.1321
		0.1324	0.1294	0.1271	0.132	0.1422	0.1501	0.2012	0.1303	0.1301	0.1297	0.1287	0.1327
		0.1278	0.1308	0.1308	0.1246	0.1269	0.1409	0.154	0.1259	0.1326	0.1269	0.1338	0.1282
		0.1301	0.1308	0.1313	0.1328	0.1455	0.1736	0.2169	0.2682	0.1483	0.1411	0.1447	0.1413
		0.1322	0.1325	0.133	0.1332	0.1498	0.1575	0.2527	0.2234	0.1609	0.1864	0.1683	0.1742
		0.1328	0.1318	0.1286	0.1356	0.1485	0.1972	0.1965	0.2224	0.1942	0.2081	0.2194	0.2094
		0.1297	0.1337	0.1299	0.1392	0.1542	0.1881	0.2311	0.2331	0.2581	0.2553	0.2576	0.2182
13:30:00	37.00	0.1445	0.1357	0.1333	0.1313	0.1394	0.1827	0.1906	0.1359	0.1432	0.1389	0.1435	0.1412
		0.1361	0.1332	0.1325	0.1318	0.1447	0.1708	0.22	0.1343	0.1348	0.1346	0.1355	0.1331
		0.132	0.1292	0.127	0.132	0.1427	0.1536	0.2116	0.1307	0.1288	0.1308	0.1294	0.1337
		0.128	0.1308	0.1307	0.1244	0.1271	0.1425	0.1593	0.1258	0.1314	0.1279	0.1353	0.1296
		0.1299	0.1302	0.1311	0.1328	0.1475	0.1795	0.2291	0.2856	0.1507	0.1443	0.1479	0.1441
		0.1322	0.1324	0.133	0.1333	0.154	0.1617	0.2706	0.2344	0.164	0.1969	0.1758	0.1826
		0.1322	0.1318	0.1287	0.1362	0.1513	0.2085	0.205	0.2323	0.2031	0.22	0.2324	0.2224
		0.1295	0.1335	0.1296	0.1392	0.1584	0.1965	0.2468	0.2487	0.2747	0.2786	0.2726	0.234
13:40:00	37.00	0.1431	0.1354	0.1331	0.1312	0.1407	0.191	0.2003	0.1357	0.144	0.1389	0.1436	0.1411
		0.1362	0.1331	0.1323	0.132	0.1466	0.1768	0.2321	0.1342	0.1357	0.1348	0.1355	0.1328
		0.1318	0.1291	0.127	0.1319	0.144	0.1573	0.2235	0.1306	0.13	0.1309	0.1293	0.1337
		0.1279	0.1337	0.1308	0.1246	0.1273	0.1449	0.1649	0.1257	0.1331	0.1281	0.1359	0.1302
		0.1294	0.1302	0.1312	0.1331	0.15	0.1859	0.2442	0.3103	0.1567	0.1468	0.1503	0.1467
		0.132	0.1324	0.1326	0.1335	0.1585	0.1671	0.2897	0.2481	0.1703	0.2073	0.1838	0.1908
		0.1322	0.1318	0.1285	0.1367	0.1552	0.224	0.2168	0.2482	0.2134	0.2327	0.2449	0.2373
		0.1296	0.1335	0.1295	0.1397	0.1632	0.2072	0.2685	0.2653	0.2968	0.3069	0.2892	0.2486
13:50:00	37.00	0.1427	0.1348	0.1333	0.1311	0.1415	0.1991	0.2095	0.1357	0.1439	0.1375	0.1435	0.1408
		0.1358	0.133	0.1323	0.132	0.1482	0.1843	0.242	0.1342	0.1357	0.1336	0.1355	0.1328
		0.1318	0.1289	0.1268	0.1321	0.1449	0.1621	0.2366	0.1302	0.1298	0.1295	0.1292	0.1337
		0.1277	0.1311	0.1308	0.1246	0.1276	0.1472	0.1714	0.1257	0.1334	0.1268	0.1362	0.1306
		0.1297	0.1301	0.131	0.1333	0.1532	0.1937	0.2571	0.3361	0.1611	0.1476	0.1527	0.149
		0.1314	0.1322	0.1327	0.1337	0.1628	0.1729	0.308	0.2639	0.1757	0.218	0.1916	0.2002
		0.132	0.1318	0.1287	0.1373	0.1595	0.2408	0.2264	0.2624	0.2237	0.2443	0.2576	0.2533
		0.1294	0.1333	0.1295	0.1399	0.1692	0.2175	0.2866	0.2883	0.3195	0.3387	0.3058	0.2637
14:00:00	37.00	0.1431	0.1349	0.1328	0.1305	0.1432	0.2103	0.2207	0.1357	0.1437	0.1377	0.1429	0.141
		0.1354	0.133	0.1323	0.1321	0.1506	0.1929	0.2577	0.1341	0.1356	0.1332	0.1358	0.1328
		0.1317	0.1288	0.1265	0.1318	0.1466	0.1676	0.2504	0.1301	0.1298	0.1295	0.1292	0.1337
		0.1272	0.1314	0.1304	0.1244	0.1283	0.1505	0.1783	0.1257	0.1341	0.1273	0.1363	0.1312
		0.1294	0.1299	0.1308	0.1337	0.1569	0.2011	0.2751	0.3664	0.1666	0.1507	0.1561	0.153
		0.1317	0.1324	0.1326	0.1341	0.1698	0.1798	0.3285	0.2848	0.1825	0.2309	0.2014	0.21
		0.1321	0.1318	0.1286	0.1382	0.1648	0.2631	0.2423	0.2827	0.2359	0.2601	0.2746	0.2693
		0.1293	0.1336	0.1294	0.1402	0.175	0.2304	0.315	0.3089	0.3447	0.3741	0.3261	0.2818
14:10:00	37.00	0.1442	0.135	0.1328	0.131	0.1452	0.2203	0.2289	0.1358	0.1435	0.1371	0.143	0.1407
		0.1351	0.1334	0.1321	0.1322	0.1527	0.201	0.2753	0.1341	0.1341	0.1333	0.1401	0.1325
		0.1316	0.1288	0.1268	0.1321	0.1479	0.1736	0.2624	0.13	0.1288	0.1295	0.1294	0.1338
		0.127	0.1311	0.1305	0.1259	0.1287	0.1536	0.1881	0.1256	0.1334	0.1272	0.1372	0.1319
		0.1292	0.1298	0.1309	0.1337	0.1615	0.2111	0.2951	0.3956	0.1727	0.1546	0.16	0.1563
		0.1315	0.1321	0.1326	0.1343	0.1759	0.1874	0.3551	0.3052	0.1881	0.2467	0.2107	0.2215
		0.1328	0.1314	0.1285	0.1389	0.1698	0.2891	0.2581	0.3022	0.2501	0.2764	0.2939	0.287
		0.1292	0.1332	0.1292	0.1407	0.1826	0.244	0.3487	0.3356	0.3718	0.4097	0.3499	0.3046
14:20:00	37.00	0.1432	0.1347	0.1328	0.1304	0.1474	0.2306	0.2408	0.1357	0.1433	0.1382	0.1427	0.1404
		0.1351	0.1328	0.1323	0.1323	0.1565	0.2096	0.298	0.134	0.1357	0.1341	0.1355	0.1327
		0.1313	0.1287	0.1265	0.1316	0.1498	0.1803	0.2778	0.1301	0.1296	0.1306	0.1294	0.1335
		0.1271	0.13	0.1302	0.1244	0.129	0.1582	0.197	0.1255	0.1355	0.1286	0.1375	0.1324
		0.1293	0.1298	0.1308	0.135	0.1674	0.2212	0.3168	0.4307	0.1813	0.16	0.1641	0.1611
		0.1312	0.1318	0.1326	0.1352	0.185	0.1963	0.3821	0.3327	0.1979	0.262	0.2205	0.2317
		0.1317	0.1315	0.1286	0.1406	0.1765	0.3203	0.2775	0.3268	0.2698	0.2982	0.3148	0.306
		0.1289	0.1331	0.1294	0.141	0.1902	0.2591	0.3861	0.3596	0.4003	0.437	0.3735	0.3296
14:30:00	37.00	0.1422	0.1355	0.1327	0.1308	0.1506	0.2428	0.2543	0.1357	0.1431	0.1382	0.1442	0.1404
		0.1346	0.1334	0.132	0.1322	0.1608	0.2184	0.323	0.134	0.1351	0.1343	0.1341	0.1325
		0.1312	0.1287	0.1265	0.1321	0.1533	0.1883	0.294	0.13	0.1297	0.1303	0.1281	0.1335
		0.1268	0.1329	0.1302	0.1245	0.1313	0.1633	0.2094	0.1255	0.136	0.1288	0.1372	0.1337
		0.1289	0.1296	0.1306	0.1345	0.176	0.2342	0.3409	0.4634	0.1929	0.1657	0.1692	0.1676
		0.1315	0.1321	0.1325	0.1355	0.1949	0.2071	0.4149	0.3614	0.2076	0.2802	0.2296	0.2466
		0.1317	0.1314	0.1283	0.1423	0.1848	0.3559	0.3009	0.3499	0.2901	0.3221	0.3331	0.3286
		0.1291	0.1331	0.1294	0.1417	0.201	0.278	0.4283	0.3844	0.4315	0.4694	0.3984	0.3606
14:40:00	37.00	0.142	0.1346	0.1326	0.1311	0.1531	0.2571	0.2725	0.1366	0.1426	0.1383	0.1425	0.1404
		0.1344	0.1323	0.1321	0.1326	0.1641	0.2308	0.3476	0.1352	0.1351	0.1338	0.1349	0.1324
		0.1309	0.1285	0.1265	0.1325	0.1549	0.1969	0.3126	0.1312	0.1297	0.1304	0.1291	0.1337
		0.127	0.1304	0.1301	0.1244	0.1309	0.1681	0.2209	0.1265	0.1373	0.1291	0.1398	0.1354
		0.1288	0.1295	0.1306	0.1355	0.1822	0.2471	0.3664	0.4971	0.2021	0.171	0.1758	0.1744
		0.1312	0.1318	0.1325	0.1363	0.2031	0.218	0.444	0.3894	0.2176	0.2987	0.244	0.2601
		0.1317	0.1313	0.1284	0.1438	0.1921	0.3925	0.3246	0.3733	0.3125	0.3483	0.358	0.3537
		0.1289	0.133	0.1294	0.1426	0.2099	0.2983	0.469	0.4153	0.4611	0.489	0.4282	0.3897
14:50:00	37.00	0.1422	0.1343	0.1325	0.1309	0.1573	0.2754	0.2921	0.1356	0.1427	0.1378	0.1424	0.1403
		0.1341	0.1324	0.1317	0.1327	0.1701	0.2447	0.3751	0.1339	0.1349	0.134	0.135	0.1339
		0.1308	0.1287	0.1263	0.1322	0.1591	0.2068	0.3328	0.13	0.1293	0.1305	0.129	0.1337
		0.1267	0.1297	0.13	0.1244	0.1332	0.1752	0.2351	0.1254	0.1387	0.1276	0.1411	0.1364
		0.1288	0.1297	0.1307	0.136	0.1957	0.2622	0.3907	0.5294	0.2161	0.1794	0.1829	0.1818
		0.1311	0.1319	0.1323	0.1372	0.2159	0.2297	0.4769	0.4202	0.2313	0.3227	0.2575	0.2812
		0.1314	0.1311	0.1284	0.146	0.2029	0.4295	0.3478	0.3985	0.3369	0.3782	0.3819	0.3793
		0.1289	0.1327	0.129	0.1431	0.2231	0.3255	0.5157	0.4488	0.4945	0.5192	0.4572	0.425
15:00:00	37.00	0.1427	0.1344	0.1325	0.1312	0.161	0.2961	0.3162	0.1366	0.1425	0.1376	0.1423	0.1402
		0.134	0.1325	0.1318	0.133	0.1756	0.2617	0.4037	0.1351	0.1348	0.134	0.1353	0.1325
		0.1305	0.1283	0.1262	0.1325	0.1617	0.2156	0.3544	0.1311	0.1295	0.1307	0.1292	0.1337
		0.1264	0.1398	0.1301	0.1246	0.1331	0.1827	0.2544	0.1265	0.1404	0.1298	0.1428	0.1382
		0.1287	0.1295	0.1305	0.1368	0.2068	0.2777	0.4178	0.5633	0.2425	0.1893	0.1915	0.191
		0.1308	0.1319	0.1322	0.1378	0.2268	0.243	0.5081	0.4508	0.2431	0.3494	0.2754	0.3018
		0.1311	0.1317	0.1284	0.1486	0.2116	0.4622	0.3741	0.4282	0.3612	0.4061	0.4333	0.4089
		0.1287	0.1326	0.1291	0.1445	0.2348	0.3527	0.5562	0.4834	0.5307	0.5523	0.4851	0.4584
15:10:00	37.00	0.1424	0.1343	0.1324	0.1315	0.1669	0.3183	0.3417	0.1367	0.1425	0.1377	0.149	0.1403
		0.1337	0.1322	0.1317	0.1332	0.183	0.2768	0.4286	0.135	0.1348	0.1338	0.1347	0.1324
		0.1308	0.1285	0.1261	0.1329	0.1667	0.2263	0.3758	0.1311	0.1294	0.1305	0.129	0.1336
		0.1264	0.1297	0.1299	0.1246	0.1357	0.1911	0.2756	0.1251	0.1414	0.1287	0.145	0.1403
		0.1287	0.1291	0.1305	0.1377	0.2235	0.297	0.4427	0.5927	0.2531	0.1983	0.2003	0.2005
		0.1308	0.1317	0.1321	0.1388	0.2418	0.2586	0.5357	0.4805	0.2574	0.3774	0.2951	0.3248
		0.1312	0.131	0.1283	0.1513	0.2211	0.4894	0.3975	0.459	0.3863	0.4345	0.4828	0.4402
		0.1287	0.1326	0.1291	0.1455	0.2501	0.381	0.5954	0.5179	0.5594	0.5904	0.5176	0.4918
15:20:00	37.00	0.1411	0.1343	0.1323	0.1313	0.1721	0.3406	0.3659	0.1366	0.1421	0.1375	0.142	0.1401
		0.1337	0.1319	0.1316	0.1336	0.1899	0.2931	0.4582	0.1349	0.1348	0.1335	0.1346	0.1326
		0.1305	0.128	0.1263	0.1328	0.1718	0.2389	0.396	0.131	0.1296	0.1304	0.1277	0.1337
		0.1261	0.1381	0.1298	0.1246	0.1375	0.1992	0.2983	0.1249	0.1448	0.1302	0.1464	0.1432
		0.1285	0.1291	0.1302	0.1384	0.2388	0.3181	0.4649	0.6133	0.2694	0.2085	0.2106	0.2115
		0.1307	0.1316	0.132	0.1401	0.2591	0.2761	0.56	0.5116	0.2733	0.4073	0.3173	0.3484
		0.1313	0.131	0.1282	0.1549	0.2333	0.5194	0.4241	0.4887	0.4111	0.4616	0.5211	0.4683
		0.1285	0.1327	0.129	0.1473	0.2672	0.4098	0.6224	0.5383	0.586	0.6189	0.5465	0.5191
15:30:00	37.00	0.141	0.1341	0.1324	0.1313	0.179	0.367	0.3898	0.1366	0.1419	0.1378	0.1419	0.1401
		0.1334	0.1318	0.1314	0.1341	0.1994	0.3095	0.4884	0.1351	0.1346	0.1337	0.1349	0.1325
		0.1302	0.1279	0.1261	0.1331	0.1777	0.2537	0.4162	0.131	0.1293	0.1305	0.1288	0.1338
		0.1262	0.1331	0.13	0.1249	0.1394	0.2079	0.3296	0.125	0.1473	0.131	0.1486	0.1446
		0.1285	0.1291	0.1302	0.1396	0.2598	0.3421	0.4927	0.6323	0.2935	0.224	0.2237	0.2263
		0.1304	0.1319	0.1319	0.1417	0.2766	0.2973	0.5898	0.5447	0.2919	0.4402	0.3407	0.3759
		0.1309	0.1308	0.1281	0.1584	0.2471	0.5461	0.4545	0.516	0.4386	0.4927	0.5681	0.4969
		0.1284	0.1325	0.1289	0.1484	0.2866	0.4391	0.6466	0.5481	0.5986	0.6176	0.5739	0.5536
15:40:00	37.00	0.1412	0.134	0.1323	0.1313	0.1852	0.3947	0.4159	0.1366	0.142	0.1373	0.1458	0.14
		0.1332	0.1317	0.1316	0.1347	0.2086	0.3245	0.5166	0.1349	0.1346	0.1337	0.1357	0.132
		0.1303	0.1277	0.1261	0.1333	0.1839	0.2715	0.4358	0.131	0.1278	0.1303	0.1286	0.134
		0.1259	0.1443	0.1296	0.1249	0.1403	0.2186	0.369	0.1264	0.1484	0.1317	0.1517	0.1481
		0.1283	0.1292	0.1303	0.1412	0.2774	0.3672	0.5225	0.6269	0.3181	0.2371	0.2355	0.2397
		0.1307	0.1315	0.1321	0.1435	0.2975	0.3202	0.6158	0.5705	0.3147	0.4695	0.3655	0.3973
		0.1309	0.1308	0.128	0.1635	0.2612	0.58	0.4845	0.5139	0.4699	0.5225	0.5969	0.5253
		0.1283	0.1324	0.1291	0.1502	0.3083	0.4688	0.6579	0.5595	0.5954	0.6216	0.5968	0.5779
15:50:00	37.00	0.1418	0.1339	0.1321	0.1318	0.196	0.4173	0.4465	0.1366	0.1418	0.1372	0.1418	0.1396
		0.1331	0.1314	0.1314	0.1354	0.2174	0.3406	0.5443	0.135	0.1344	0.1335	0.1363	0.132
		0.1301	0.1279	0.126	0.1339	0.1923	0.2902	0.4585	0.1297	0.1294	0.1303	0.1341	0.1342
		0.126	0.1292	0.1296	0.1251	0.1442	0.2299	0.4145	0.125	0.1534	0.1324	0.1558	0.1525
		0.1283	0.1291	0.1301	0.1427	0.2998	0.3969	0.5473	0.6237	0.3567	0.2577	0.2525	0.2563
		0.1303	0.1313	0.1317	0.1454	0.3244	0.3459	0.6422	0.5938	0.34	0.5008	0.3882	0.4259
		0.1307	0.1307	0.1282	0.1685	0.2806	0.6079	0.5107	0.5158	0.4963	0.5488	0.6203	0.5564
		0.1284	0.1323	0.1288	0.1536	0.3346	0.5016	0.6589	0.5736	0.5957	0.6267	0.5988	0.5975
16:00:00	37.00	0.1405	0.1337	0.1319	0.1325	0.2036	0.4447	0.4778	0.1365	0.1426	0.137	0.1419	0.1395
		0.1331	0.1315	0.1313	0.1361	0.2279	0.3563	0.5479	0.1349	0.1342	0.1335	0.1366	0.132
		0.1298	0.1279	0.1259	0.1342	0.2002	0.3109	0.4811	0.131	0.1293	0.1291	0.1288	0.1345
		0.1258	0.1294	0.1296	0.1253	0.1464	0.2444	0.4555	0.1263	0.1567	0.1318	0.1621	0.156
		0.1281	0.1291	0.1306	0.1443	0.3194	0.4238	0.5675	0.62	0.3992	0.2758	0.2666	0.2724
		0.1305	0.1311	0.1319	0.1475	0.35	0.3686	0.6627	0.5872	0.3649	0.5311	0.4123	0.4516
		0.1306	0.1306	0.1281	0.1745	0.3003	0.6181	0.5239	0.5168	0.5187	0.5621	0.6316	0.5829
		0.1281	0.1326	0.1289	0.1561	0.3616	0.5301	0.6678	0.5834	0.5972	0.6314	0.596	0.6108
16:10:00	37.00	0.1408	0.1337	0.1321	0.1328	0.2155	0.4806	0.5043	0.1366	0.1415	0.137	0.1414	0.1399
		0.1328	0.1314	0.1312	0.1367	0.2387	0.3802	0.5484	0.1348	0.1341	0.1335	0.1344	0.1317
		0.13	0.1277	0.126	0.1347	0.2114	0.3335	0.5032	0.131	0.1293	0.1302	0.1287	0.1348
		0.1257	0.1367	0.1297	0.1255	0.1501	0.2611	0.5122	0.1264	0.1622	0.1332	0.1662	0.1614
		0.1279	0.129	0.13	0.147	0.3412	0.4575	0.5657	0.6201	0.4378	0.31	0.2897	0.2984
		0.1302	0.1312	0.1316	0.1512	0.3801	0.4017	0.6628	0.5912	0.3935	0.5674	0.4448	0.4853
		0.1303	0.1306	0.1281	0.1821	0.322	0.6273	0.5241	0.5185	0.5183	0.5608	0.6293	0.6076
		0.128	0.1322	0.1287	0.1599	0.3894	0.5609	0.6601	0.5941	0.5986	0.6331	0.5987	0.611
16:20:00	37.00	0.1404	0.1336	0.132	0.1344	0.2268	0.509	0.522	0.1364	0.1414	0.1368	0.1413	0.1437
		0.1326	0.1319	0.1314	0.1393	0.2555	0.402	0.551	0.135	0.1343	0.1336	0.1342	0.132
		0.1297	0.1275	0.1259	0.1364	0.2221	0.356	0.5176	0.1311	0.1292	0.1302	0.1293	0.1352
		0.1257	0.129	0.1298	0.1272	0.1557	0.281	0.5519	0.1251	0.1661	0.1357	0.1717	0.1691
		0.1281	0.129	0.13	0.1508	0.3713	0.4841	0.5682	0.6175	0.4811	0.3368	0.3133	0.321
		0.13	0.1315	0.1316	0.1557	0.408	0.4231	0.6622	0.594	0.4247	0.5937	0.4721	0.5132
		0.1303	0.1303	0.1282	0.1918	0.3435	0.6207	0.5275	0.5192	0.5185	0.563	0.6337	0.625
		0.128	0.1322	0.1286	0.1648	0.4183	0.5824	0.6524	0.6039	0.6005	0.6355	0.6014	0.602
16:30:00	37.00	0.1407	0.1336	0.1319	0.1352	0.2398	0.5346	0.515	0.1365	0.1415	0.1369	0.142	0.1431
		0.1326	0.1322	0.1313	0.1404	0.2721	0.4073	0.553	0.1349	0.134	0.1333	0.134	0.1318
		0.1295	0.1276	0.126	0.1371	0.2333	0.3755	0.515	0.1297	0.1291	0.1291	0.1286	0.1358
		0.1256	0.1292	0.1294	0.1276	0.16	0.3006	0.5733	0.1251	0.1723	0.1355	0.1794	0.1735
		0.128	0.1291	0.1299	0.1539	0.4029	0.5185	0.5708	0.6171	0.5301	0.3649	0.34	0.3453
		0.1302	0.131	0.1316	0.1593	0.4413	0.4498	0.6596	0.597	0.4489	0.6139	0.4977	0.5264
		0.1304	0.1304	0.1279	0.2006	0.3667	0.6119	0.5307	0.5189	0.5208	0.5662	0.6363	0.6164
		0.128	0.132	0.1287	0.1696	0.4428	0.5807	0.6471	0.6106	0.6019	0.6356	0.6015	0.599
16:40:00	37.00	0.1406	0.1336	0.1318	0.1347	0.255	0.5462	0.5157	0.1364	0.1413	0.1364	0.1411	0.1412
		0.1326	0.1313	0.1309	0.1407	0.2935	0.4106	0.555	0.1349	0.134	0.1331	0.134	0.1317
		0.1295	0.1272	0.1259	0.1368	0.2476	0.402	0.5165	0.1309	0.1291	0.1304	0.1287	0.1361
		0.1256	0.1289	0.1293	0.1268	0.166	0.3214	0.5855	0.125	0.1784	0.1391	0.1873	0.1789
		0.1279	0.1288	0.1299	0.1561	0.4293	0.5519	0.5734	0.6147	0.579	0.3953	0.368	0.3712
		0.1302	0.1311	0.1317	0.1628	0.4821	0.478	0.6587	0.5995	0.4805	0.621	0.4989	0.5203
		0.1303	0.1305	0.1279	0.2072	0.3898	0.607	0.5351	0.5192	0.5217	0.5672	0.6369	0.6133
		0.1278	0.1319	0.1288	0.1734	0.4698	0.5793	0.6434	0.6163	0.6022	0.6352	0.601	0.5955
16:50:00	37.00	0.1404	0.1336	0.1319	0.1356	0.2731	0.5408	0.519	0.1365	0.1413	0.1364	0.1411	0.1403
		0.1318	0.1315	0.1312	0.1425	0.3156	0.4163	0.5582	0.1348	0.1338	0.1332	0.1341	0.1317
		0.1296	0.1273	0.1258	0.1374	0.2621	0.4283	0.5198	0.1309	0.129	0.1305	0.1285	0.1366
		0.1255	0.129	0.1293	0.1271	0.173	0.3387	0.5985	0.125	0.1864	0.141	0.1982	0.1871
		0.128	0.1292	0.1297	0.1601	0.452	0.5818	0.5747	0.6132	0.6245	0.4335	0.4055	0.4115
		0.1302	0.1311	0.1316	0.1688	0.5267	0.5044	0.6596	0.6036	0.5153	0.6161	0.5016	0.5242
		0.13	0.1302	0.1282	0.2171	0.4147	0.6041	0.5367	0.5201	0.5254	0.569	0.6363	0.6138
		0.128	0.1321	0.1287	0.18	0.5001	0.5814	0.6391	0.6227	0.6008	0.6347	0.6015	0.5929
17:00:00	37.00	0.1401	0.1335	0.1319	0.136	0.2908	0.5392	0.5222	0.1364	0.1413	0.1365	0.1411	0.1391
		0.1319	0.1312	0.131	0.145	0.3423	0.4205	0.5599	0.1347	0.1339	0.1333	0.134	0.1316
		0.1292	0.1274	0.1258	0.1386	0.2795	0.4452	0.5227	0.1309	0.1292	0.129	0.1285	0.137
		0.1251	0.1286	0.1294	0.1277	0.1798	0.3542	0.5951	0.1263	0.2058	0.1442	0.2131	0.1993
		0.1278	0.1287	0.1296	0.164	0.4782	0.5957	0.5783	0.6117	0.6832	0.4786	0.4439	0.4525
		0.1299	0.1312	0.1315	0.1755	0.5688	0.5253	0.6615	0.6061	0.5408	0.6127	0.507	0.5262
		0.1299	0.1304	0.1281	0.2268	0.4439	0.6033	0.5414	0.5201	0.5255	0.5688	0.6365	0.6131
		0.1277	0.132	0.1286	0.1862	0.5348	0.5804	0.6366	0.6302	0.6012	0.6337	0.6023	0.5889
17:10:00	37.00	0.1396	0.1332	0.1319	0.1376	0.3149	0.5415	0.5236	0.1365	0.1411	0.1361	0.1409	0.1387
		0.1317	0.131	0.1311	0.1472	0.3658	0.4277	0.5605	0.1348	0.1339	0.1332	0.1342	0.1315
		0.1293	0.1273	0.1255	0.14	0.3013	0.4673	0.5238	0.131	0.1278	0.1304	0.127	0.138
		0.1252	0.1285	0.1293	0.1283	0.1905	0.3784	0.593	0.1251	0.2041	0.147	0.2244	0.2068
		0.1275	0.1285	0.1297	0.1698	0.5105	0.6003	0.5776	0.6106	0.7417	0.5163	0.4823	0.498
		0.1298	0.131	0.1315	0.1832	0.5822	0.5283	0.6579	0.6083	0.5698	0.6158	0.5145	0.5303
		0.1302	0.1302	0.1282	0.2434	0.469	0.6009	0.5413	0.519	0.5285	0.5698	0.6366	0.6147
		0.1276	0.1319	0.1287	0.1947	0.5587	0.5804	0.6338	0.6321	0.6014	0.6331	0.6018	0.5875
17:20:00	37.00	0.14	0.1335	0.1317	0.1382	0.3376	0.541	0.5262	0.1363	0.141	0.1367	0.1407	0.139
		0.1319	0.131	0.131	0.1502	0.3909	0.4294	0.5607	0.1347	0.1336	0.1331	0.1336	0.1313
		0.129	0.1272	0.1257	0.1412	0.323	0.4637	0.5251	0.1308	0.1291	0.1308	0.1285	0.139
		0.1254	0.1287	0.1292	0.1293	0.2003	0.3973	0.5922	0.1263	0.2227	0.1496	0.2398	0.2188
		0.1276	0.1285	0.1297	0.1759	0.5379	0.6068	0.5789	0.6084	0.7552	0.5533	0.5176	0.5337
		0.1296	0.131	0.1314	0.1915	0.5966	0.5275	0.6574	0.6099	0.5679	0.6113	0.5174	0.5282
		0.1302	0.1301	0.1284	0.257	0.4822	0.5984	0.5424	0.5184	0.5278	0.5694	0.6367	0.6129
		0.1275	0.1326	0.129	0.203	0.5778	0.5784	0.6309	0.6373	0.6014	0.6335	0.6011	0.5824
17:30:00	37.00	0.1394	0.1333	0.1317	0.1404	0.3644	0.5438	0.528	0.1365	0.1408	0.1361	0.1405	0.1389
		0.1316	0.1307	0.131	0.1532	0.4181	0.4327	0.5614	0.1347	0.1334	0.1329	0.1341	0.1311
		0.1291	0.1272	0.1255	0.1432	0.3473	0.4703	0.5259	0.131	0.1278	0.1295	0.1308	0.1397
		0.1247	0.1285	0.1292	0.1299	0.2125	0.416	0.5906	0.125	0.2246	0.1528	0.2551	0.2381
		0.1273	0.1282	0.1296	0.183	0.5553	0.614	0.5799	0.6077	0.787	0.6078	0.5622	0.589
		0.1297	0.1309	0.1315	0.2018	0.6098	0.5311	0.6559	0.6123	0.5765	0.613	0.5231	0.5329
		0.1298	0.1301	0.1283	0.279	0.4838	0.5954	0.5425	0.5186	0.5295	0.5696	0.6368	0.6129
		0.1276	0.1315	0.1287	0.2148	0.5853	0.579	0.6278	0.6393	0.6003	0.6333	0.6008	0.5815
17:40:00	37.00	0.1393	0.1332	0.1315	0.1428	0.3911	0.5442	0.5297	0.1364	0.1408	0.136	0.1404	0.1388
		0.1313	0.1308	0.1309	0.1586	0.4494	0.4363	0.5615	0.1346	0.1334	0.1328	0.1342	0.131
		0.1288	0.127	0.1255	0.146	0.3747	0.4748	0.5263	0.1309	0.129	0.1308	0.1285	0.1407
		0.1248	0.1282	0.1292	0.1326	0.226	0.4165	0.5915	0.1249	0.24	0.1586	0.2757	0.2527
		0.1272	0.1284	0.1295	0.1926	0.5513	0.6183	0.5804	0.6063	0.8149	0.6569	0.6078	0.6403
		0.1296	0.1309	0.1315	0.215	0.6213	0.5343	0.6562	0.6149	0.5837	0.6113	0.5263	0.5334
		0.1298	0.13	0.1286	0.3008	0.4904	0.593	0.5426	0.5176	0.5298	0.5695	0.6372	0.6126
		0.1274	0.1318	0.1286	0.2271	0.5785	0.5771	0.6258	0.6443	0.6	0.6331	0.6	0.5791
17:50:00	37.00	0.1394	0.1331	0.1315	0.1456	0.4153	0.544	0.5299	0.1365	0.1406	0.1362	0.1419	0.1387
		0.1312	0.1306	0.1309	0.1628	0.4786	0.4388	0.5598	0.1346	0.1335	0.1327	0.1336	0.1313
		0.1287	0.1273	0.1255	0.1483	0.3981	0.4785	0.5266	0.1309	0.1291	0.1312	0.1275	0.143
		0.125	0.1283	0.129	0.1335	0.2411	0.421	0.5901	0.1263	0.2646	0.1613	0.2986	0.2659
		0.1271	0.1285	0.1294	0.2011	0.5497	0.6225	0.581	0.6054	0.8221	0.6959	0.6444	0.6876
		0.1296	0.1308	0.1314	0.2262	0.6287	0.5351	0.6539	0.6168	0.5876	0.6104	0.5305	0.5329
		0.1296	0.13	0.1285	0.3232	0.4955	0.5907	0.5425	0.518	0.5296	0.5692	0.6378	0.6113
		0.1276	0.1316	0.1288	0.24	0.5661	0.5765	0.6229	0.6496	0.5995	0.6333	0.6004	0.5771
18:00:00	37.00	0.1393	0.1331	0.1315	0.1478	0.4429	0.5431	0.5312	0.1363	0.1406	0.1357	0.1401	0.1387
		0.131	0.1304	0.1307	0.1692	0.5051	0.4421	0.56	0.1346	0.1331	0.1327	0.1338	0.131
		0.129	0.1272	0.1255	0.1505	0.425	0.4827	0.5271	0.1295	0.1277	0.1313	0.1273	0.1438
		0.1248	0.1281	0.1289	0.1356	0.261	0.4282	0.5899	0.1248	0.2695	0.1667	0.3204	0.2725
		0.1272	0.1283	0.1293	0.2111	0.55	0.6248	0.5809	0.6045	0.8336	0.7356	0.6732	0.7204
		0.1296	0.1307	0.1314	0.2381	0.6344	0.538	0.6519	0.6189	0.5921	0.6077	0.5333	0.5304
		0.1296	0.13	0.1288	0.3448	0.502	0.5878	0.5422	0.518	0.5294	0.569	0.6387	0.6098
		0.1272	0.1314	0.1288	0.2536	0.5515	0.5751	0.6215	0.6527	0.5991	0.6342	0.599	0.5744
18:10:00	37.00	0.14	0.1328	0.1317	0.1521	0.4691	0.5441	0.533	0.1363	0.1403	0.1359	0.1401	0.1387
		0.1308	0.1304	0.1308	0.1744	0.5168	0.4441	0.5601	0.1345	0.1333	0.1326	0.1338	0.1314
		0.1285	0.1268	0.1255	0.1541	0.4537	0.4846	0.5267	0.1307	0.1289	0.1316	0.1273	0.1465
		0.1247	0.128	0.1289	0.1371	0.2809	0.4333	0.5897	0.1263	0.2917	0.1732	0.3462	0.2972
		0.1271	0.1282	0.1294	0.222	0.5514	0.6278	0.581	0.6039	0.8479	0.7985	0.6853	0.7397
		0.1294	0.1307	0.1314	0.2544	0.6383	0.5421	0.6514	0.6233	0.5934	0.6049	0.5354	0.5312
		0.1296	0.1299	0.129	0.3629	0.5061	0.586	0.5421	0.5181	0.5295	0.5689	0.6399	0.609
		0.1272	0.1312	0.1287	0.2696	0.5422	0.5739	0.6188	0.6581	0.5983	0.6344	0.599	0.5735
18:20:00	37.00	0.1392	0.1329	0.1312	0.1547	0.4877	0.5425	0.5317	0.1363	0.1402	0.1356	0.1401	0.1384
		0.1308	0.1303	0.1307	0.182	0.5184	0.4443	0.5591	0.1345	0.133	0.1325	0.1334	0.1311
		0.1286	0.1268	0.125	0.1575	0.4701	0.4856	0.5282	0.1307	0.1289	0.1318	0.1285	0.1498
		0.1244	0.1279	0.1288	0.1394	0.3007	0.436	0.5882	0.1262	0.3335	0.1925	0.378	0.3135
		0.1271	0.128	0.1294	0.2336	0.551	0.6291	0.5817	0.604	0.8404	0.8226	0.6844	0.7376
		0.1295	0.1307	0.1315	0.2723	0.6405	0.5424	0.6502	0.626	0.5947	0.5998	0.5382	0.5309
		0.1298	0.1298	0.1293	0.3852	0.5073	0.5861	0.5428	0.518	0.5293	0.5706	0.6402	0.6082
		0.127	0.1314	0.1287	0.2823	0.5278	0.5723	0.6183	0.6632	0.599	0.6346	0.5989	0.5715
18:30:00	37.00	0.139	0.1326	0.1314	0.1606	0.4925	0.5429	0.533	0.1363	0.1404	0.1356	0.1399	0.1386
		0.1307	0.1312	0.1306	0.1885	0.5228	0.4471	0.5599	0.1345	0.1332	0.1325	0.1332	0.131
		0.1286	0.1268	0.1253	0.1629	0.5017	0.4883	0.5285	0.1309	0.1292	0.1325	0.1288	0.1519
		0.1246	0.1278	0.1288	0.141	0.3344	0.4433	0.5893	0.1262	0.3388	0.1898	0.4063	0.3801
		0.127	0.1281	0.1292	0.2491	0.5543	0.6308	0.5828	0.6047	0.8649	0.8458	0.6891	0.7443
		0.1294	0.1304	0.1314	0.2909	0.6443	0.5448	0.6493	0.6298	0.596	0.5972	0.5409	0.532
		0.1295	0.1296	0.1298	0.4074	0.5089	0.5833	0.5429	0.5182	0.5301	0.5706	0.6412	0.6082
		0.1269	0.1311	0.1287	0.3049	0.517	0.5714	0.6162	0.6661	0.5993	0.6349	0.5991	0.5716
18:40:00	37.00	0.1391	0.1325	0.131	0.1647	0.489	0.5423	0.5329	0.1362	0.1404	0.1354	0.1398	0.1383
		0.1308	0.1307	0.1305	0.1988	0.5282	0.4496	0.5599	0.1345	0.1332	0.1326	0.1335	0.131
		0.1284	0.1266	0.125	0.167	0.5069	0.4906	0.5286	0.1309	0.1296	0.133	0.1287	0.1558
		0.1243	0.1277	0.1287	0.1432	0.3644	0.4479	0.5894	0.1262	0.3691	0.1975	0.4265	0.4438
		0.1268	0.128	0.1293	0.2635	0.5527	0.6305	0.5829	0.6042	0.8694	0.8442	0.6904	0.7445
		0.1295	0.1307	0.1317	0.3133	0.6453	0.5463	0.6468	0.6321	0.598	0.5956	0.5427	0.5298
		0.1294	0.1296	0.1302	0.4352	0.51	0.5826	0.543	0.5191	0.5302	0.5715	0.6421	0.6077
		0.1272	0.1312	0.129	0.3241	0.5081	0.5696	0.6152	0.6709	0.5994	0.6347	0.5989	0.57
18:50:00	37.00	0.1396	0.1324	0.1312	0.1718	0.4833	0.5426	0.5342	0.1362	0.1403	0.1351	0.1398	0.1393
		0.1306	0.1303	0.1306	0.2068	0.5331	0.4508	0.5601	0.1345	0.133	0.1323	0.1337	0.1309
		0.1287	0.1266	0.1253	0.1747	0.5129	0.49	0.5296	0.1309	0.1294	0.1339	0.1278	0.1601
		0.1243	0.1278	0.1288	0.1454	0.3965	0.4507	0.5904	0.1248	0.4152	0.2082	0.4718	0.4694
		0.1266	0.1279	0.1291	0.2832	0.554	0.6336	0.5843	0.6053	0.8706	0.8541	0.6907	0.7455
		0.1292	0.1304	0.1313	0.3367	0.6478	0.5486	0.6473	0.6362	0.599	0.5926	0.5453	0.5314
		0.1291	0.1297	0.1303	0.4541	0.5108	0.5816	0.5433	0.5191	0.5297	0.5711	0.644	0.6079
		0.127	0.1313	0.129	0.3521	0.4989	0.5699	0.6144	0.6752	0.5997	0.6359	0.599	0.5694
19:00:00	37.00	0.1388	0.1324	0.1312	0.1777	0.4791	0.543	0.535	0.1361	0.1401	0.1354	0.1398	0.1392
		0.1305	0.13	0.1305	0.2185	0.5365	0.4539	0.5605	0.1344	0.1329	0.1321	0.1331	0.1309
		0.1284	0.1265	0.1253	0.1788	0.5215	0.491	0.5299	0.1307	0.1296	0.1341	0.1289	0.1663
		0.1245	0.1277	0.1286	0.1492	0.4283	0.4546	0.5905	0.1262	0.4494	0.2179	0.498	0.5024
		0.1267	0.128	0.1292	0.3025	0.553	0.6362	0.5851	0.6044	0.8717	0.8707	0.689	0.7434
		0.1293	0.1303	0.1317	0.3596	0.65	0.5504	0.6463	0.6386	0.5999	0.5903	0.5466	0.529
		0.1291	0.1295	0.1309	0.4598	0.5131	0.5813	0.5434	0.5195	0.5302	0.5712	0.6452	0.6065
		0.1269	0.1311	0.1292	0.3767	0.4856	0.5699	0.6126	0.6782	0.5987	0.636	0.5983	0.568
19:10:00	37.00	0.1387	0.1324	0.1311	0.1865	0.4783	0.5437	0.5358	0.1362	0.14	0.1351	0.1396	0.139
		0.1303	0.1301	0.1307	0.23	0.54	0.4535	0.5601	0.1344	0.1332	0.1322	0.1332	0.1309
		0.1281	0.1264	0.1248	0.1885	0.5297	0.4916	0.5307	0.1307	0.1298	0.138	0.1277	0.1721
		0.1242	0.1284	0.1285	0.152	0.4607	0.4565	0.5916	0.1247	0.4811	0.2301	0.5551	0.512
		0.1266	0.1278	0.1289	0.3254	0.5526	0.6382	0.5858	0.6055	0.8619	0.8988	0.6884	0.7452
		0.1292	0.1302	0.1316	0.3837	0.6523	0.5529	0.6462	0.6427	0.6013	0.5894	0.5492	0.5316
		0.129	0.1293	0.1319	0.4639	0.5123	0.5803	0.5444	0.5195	0.5303	0.5724	0.6467	0.607
		0.1266	0.131	0.1291	0.3988	0.4795	0.5677	0.6108	0.6832	0.5995	0.6356	0.5984	0.5684
19:20:00	37.00	0.1391	0.1325	0.131	0.1954	0.4728	0.5435	0.5362	0.1362	0.1399	0.1351	0.1395	0.1386
		0.1303	0.13	0.1304	0.2467	0.5428	0.4535	0.5608	0.1343	0.1327	0.1323	0.1332	0.1306
		0.1279	0.1264	0.1251	0.1969	0.5469	0.4921	0.5325	0.1307	0.13	0.1358	0.1296	0.1773
		0.124	0.1278	0.1282	0.1585	0.4878	0.459	0.5925	0.1247	0.555	0.2435	0.5894	0.5273
		0.1266	0.128	0.1293	0.3467	0.5533	0.6416	0.587	0.6047	0.8263	0.8932	0.6835	0.7382
		0.1293	0.1305	0.1316	0.4068	0.653	0.5559	0.6453	0.6444	0.6034	0.5876	0.5516	0.5311
		0.1291	0.1296	0.1324	0.4663	0.512	0.58	0.5452	0.5188	0.5297	0.5739	0.6478	0.6071
		0.1266	0.1309	0.1294	0.4259	0.4693	0.567	0.6106	0.6871	0.5999	0.636	0.5987	0.5667
19:30:00	37.00	0.139	0.1323	0.1307	0.2043	0.476	0.5421	0.538	0.1361	0.1397	0.1348	0.1404	0.1386
		0.1301	0.1297	0.1303	0.2613	0.5454	0.4499	0.5617	0.1344	0.1327	0.1323	0.1331	0.1306
		0.128	0.1265	0.1247	0.2093	0.5516	0.4918	0.5349	0.1309	0.13	0.1361	0.1296	0.2145
		0.124	0.1273	0.1284	0.1604	0.5099	0.4585	0.5937	0.1247	0.6685	0.3036	0.6334	0.6129
		0.1265	0.1277	0.1289	0.368	0.555	0.6454	0.5885	0.6052	0.8113	0.8963	0.682	0.7388
		0.1288	0.1303	0.1318	0.4323	0.6569	0.5576	0.6467	0.6497	0.6047	0.585	0.5543	0.5318
		0.1287	0.1294	0.1332	0.4719	0.5107	0.5795	0.5462	0.5201	0.5309	0.5739	0.649	0.607
		0.1267	0.131	0.1298	0.448	0.4621	0.5662	0.6101	0.6913	0.5999	0.636	0.598	0.5667
19:40:00	37.00	0.1388	0.1323	0.1307	0.2184	0.4779	0.542	0.5392	0.1359	0.1397	0.1348	0.1392	0.1382
		0.1301	0.1297	0.1304	0.2821	0.5475	0.4481	0.5628	0.1342	0.1326	0.1322	0.1331	0.1307
		0.1281	0.1265	0.125	0.2217	0.5524	0.4943	0.5346	0.1307	0.1292	0.1394	0.1299	0.1979
		0.1239	0.1332	0.1284	0.1669	0.5429	0.4595	0.5953	0.1261	0.6837	0.2799	0.7004	0.5725
		0.1264	0.1276	0.129	0.39	0.5567	0.6472	0.5893	0.6054	0.8018	0.8997	0.6789	0.7364
		0.1288	0.13	0.1317	0.4596	0.6593	0.5612	0.6462	0.6525	0.6077	0.5847	0.5566	0.5323
		0.1289	0.1292	0.1344	0.477	0.5128	0.5795	0.5464	0.5192	0.5311	0.574	0.6506	0.6067
		0.1266	0.1309	0.1298	0.4739	0.4534	0.5661	0.6082	0.6936	0.6002	0.6367	0.5983	0.5661
19:50:00	37.00	0.1384	0.1325	0.1308	0.228	0.4805	0.5382	0.5393	0.1361	0.1397	0.1347	0.1395	0.1383
		0.13	0.1296	0.1304	0.3014	0.5474	0.4463	0.5623	0.1343	0.1325	0.1322	0.1326	0.1305
		0.1279	0.1264	0.1252	0.235	0.5442	0.4938	0.5367	0.1306	0.1308	0.1429	0.1288	0.2221
		0.124	0.1271	0.1283	0.1724	0.5637	0.4572	0.5965	0.1247	0.6774	0.3145	0.7298	0.5912
		0.1263	0.1278	0.129	0.4056	0.5559	0.6523	0.5898	0.6064	0.7884	0.8921	0.6741	0.7329
		0.1285	0.1301	0.1318	0.477	0.6624	0.5634	0.6461	0.6556	0.6077	0.5815	0.558	0.5329
		0.1287	0.1293	0.1354	0.4817	0.5117	0.5786	0.5477	0.5187	0.5308	0.5756	0.6518	0.6062
		0.1266	0.1307	0.1298	0.5007	0.4497	0.5643	0.6083	0.6967	0.5996	0.6359	0.5987	0.5647
20:00:00	37.00	0.138	0.1324	0.1308	0.2399	0.478	0.5369	0.5413	0.1359	0.1395	0.135	0.1392	0.1387
		0.1294	0.1295	0.1304	0.3242	0.5495	0.4449	0.5626	0.1343	0.1326	0.132	0.1327	0.1304
		0.1279	0.1263	0.1249	0.2475	0.5397	0.4948	0.5386	0.1308	0.1312	0.1494	0.1311	0.2284
		0.1238	0.1271	0.1282	0.1816	0.5917	0.4584	0.5968	0.1247	0.6736	0.3281	0.7669	0.594
		0.1264	0.1275	0.1291	0.4271	0.5589	0.6549	0.5903	0.6053	0.7791	0.8821	0.6668	0.7274
		0.1289	0.13	0.1319	0.4816	0.667	0.566	0.6446	0.6585	0.6089	0.5805	0.5604	0.5321
		0.1287	0.1293	0.1368	0.4866	0.5114	0.5781	0.5487	0.5182	0.5312	0.5761	0.6526	0.6059
		0.1263	0.1314	0.1303	0.5226	0.4435	0.5637	0.6076	0.7001	0.5997	0.6367	0.5984	0.5646
20:10:00	37.00	0.1381	0.1323	0.1309	0.2565	0.4786	0.535	0.5414	0.1361	0.1394	0.1346	0.1391	0.1385
		0.1297	0.1293	0.1303	0.3459	0.5505	0.4433	0.5629	0.1342	0.1324	0.132	0.133	0.1303
		0.128	0.1263	0.1249	0.268	0.5318	0.497	0.5393	0.1293	0.1306	0.1455	0.1314	0.2631
		0.1236	0.1269	0.1284	0.1886	0.6112	0.4572	0.5988	0.1247	0.6991	0.3442	0.7765	0.605
		0.1264	0.1274	0.1289	0.4487	0.5605	0.6595	0.5912	0.6066	0.7736	0.8804	0.6631	0.7269
		0.1288	0.13	0.1323	0.4839	0.6707	0.5685	0.6459	0.6631	0.6102	0.579	0.5618	0.5327
		0.1287	0.1293	0.1383	0.4898	0.5108	0.577	0.549	0.5182	0.5308	0.5775	0.6541	0.6056
		0.1264	0.1309	0.1307	0.5395	0.4399	0.562	0.6071	0.7017	0.5991	0.637	0.5989	0.5641
20:20:00	37.00	0.1382	0.1321	0.1311	0.2749	0.4774	0.5357	0.5432	0.136	0.1397	0.1344	0.1391	0.1385
		0.1295	0.1293	0.1303	0.3778	0.5516	0.4433	0.5636	0.1343	0.1325	0.1322	0.1328	0.1303
		0.1278	0.1259	0.1248	0.2899	0.5289	0.4993	0.5417	0.1308	0.1326	0.1437	0.1312	0.2293
		0.124	0.127	0.1284	0.2019	0.6015	0.4599	0.5999	0.1263	0.7384	0.3713	0.8331	0.6113
		0.1261	0.1275	0.1287	0.4794	0.5628	0.6622	0.5917	0.6065	0.7701	0.8734	0.6615	0.7266
		0.1285	0.13	0.1326	0.4885	0.6728	0.5711	0.6457	0.667	0.6128	0.5796	0.5646	0.5338
		0.1287	0.1291	0.1407	0.4956	0.5129	0.5767	0.5507	0.518	0.5313	0.5778	0.6552	0.6058
		0.1264	0.1314	0.1309	0.5069	0.4378	0.5614	0.6058	0.7061	0.6	0.6368	0.5999	0.5649
20:30:00	37.00	0.1382	0.1318	0.1308	0.2944	0.4756	0.5344	0.5436	0.1359	0.1392	0.1345	0.1458	0.1385
		0.1293	0.1295	0.1301	0.4038	0.5517	0.442	0.5637	0.1342	0.1323	0.1318	0.1326	0.1304
		0.1279	0.126	0.1246	0.3079	0.5263	0.501	0.5422	0.1294	0.1334	0.1487	0.1329	0.2511
		0.1237	0.1269	0.1282	0.2108	0.5955	0.4602	0.6	0.1249	0.7553	0.3986	0.815	0.6157
		0.1261	0.1275	0.129	0.4914	0.5666	0.6655	0.5921	0.6072	0.763	0.8661	0.6563	0.7233
		0.1285	0.1299	0.1327	0.4893	0.6759	0.5733	0.6445	0.6715	0.6132	0.577	0.5664	0.5336
		0.1284	0.1292	0.1429	0.4956	0.5119	0.576	0.5516	0.5175	0.5315	0.5785	0.656	0.6047
		0.1264	0.1305	0.1314	0.474	0.4379	0.56	0.6058	0.7079	0.5994	0.6375	0.5989	0.565
20:40:00	37.00	0.1383	0.1321	0.1308	0.3142	0.4743	0.5344	0.5447	0.1359	0.1389	0.1345	0.1395	0.1388
		0.1291	0.1294	0.1303	0.4383	0.5531	0.4424	0.5647	0.1342	0.1321	0.1319	0.1327	0.1307
		0.1278	0.126	0.125	0.3288	0.5233	0.5024	0.5442	0.1294	0.1343	0.1487	0.1338	0.2657
		0.1234	0.1269	0.1282	0.2259	0.5826	0.4586	0.6016	0.1249	0.7882	0.4284	0.8562	0.6275
		0.1263	0.1276	0.1289	0.4974	0.5689	0.6694	0.5934	0.6067	0.7569	0.8524	0.6506	0.7179
		0.1285	0.1297	0.1333	0.4902	0.6793	0.5759	0.6444	0.6701	0.6147	0.5761	0.5685	0.534
		0.1284	0.1293	0.1453	0.499	0.5114	0.5755	0.5539	0.5171	0.5314	0.5808	0.6566	0.6049
		0.1264	0.1305	0.1321	0.4473	0.4365	0.5583	0.6065	0.7117	0.5999	0.6369	0.6004	0.5651
20:50:00	37.00	0.1382	0.1318	0.1309	0.3396	0.4755	0.5343	0.5451	0.136	0.1391	0.1344	0.1553	0.1387
		0.129	0.1291	0.1303	0.4716	0.5523	0.4405	0.5647	0.1342	0.1322	0.1319	0.1327	0.1305
		0.1275	0.126	0.1248	0.3567	0.5191	0.5031	0.5467	0.1311	0.1359	0.1514	0.1373	0.2767
		0.1236	0.1267	0.1282	0.2381	0.5706	0.4569	0.6036	0.1248	0.8145	0.4683	0.8388	0.644
		0.126	0.1272	0.1288	0.4865	0.5709	0.6736	0.5933	0.6072	0.7517	0.8496	0.6481	0.7192
		0.1286	0.1301	0.1336	0.4969	0.6824	0.5781	0.645	0.6708	0.6167	0.5755	0.5697	0.5344
		0.1284	0.1291	0.149	0.501	0.5115	0.5751	0.5552	0.5177	0.5315	0.5805	0.6573	0.6049
		0.1264	0.1306	0.1326	0.4212	0.436	0.5561	0.606	0.7141	0.5989	0.6377	0.6004	0.5658
21:00:00	37.00	0.1378	0.1321	0.1307	0.3636	0.4744	0.5324	0.5454	0.1359	0.139	0.1344	0.139	0.1387
		0.1292	0.1296	0.1302	0.51	0.5526	0.4385	0.5644	0.1341	0.132	0.1315	0.1325	0.1304
		0.1279	0.126	0.1247	0.3786	0.5046	0.5036	0.5486	0.1306	0.1367	0.1657	0.1374	0.3068
		0.1233	0.1266	0.1281	0.2535	0.5567	0.455	0.6037	0.1247	0.7885	0.5211	0.8403	0.641
		0.1259	0.1275	0.1289	0.4806	0.5736	0.6789	0.5936	0.6069	0.7419	0.8388	0.6388	0.7153
		0.1284	0.1297	0.1337	0.4973	0.6872	0.5799	0.6453	0.6708	0.6177	0.5725	0.5717	0.5341
		0.1287	0.1291	0.1525	0.5006	0.5087	0.5744	0.5565	0.5157	0.5315	0.5826	0.6577	0.604
		0.1263	0.1306	0.133	0.4046	0.4326	0.5521	0.6062	0.7153	0.599	0.6377	0.5999	0.5657
21:10:00	37.00	0.1376	0.1318	0.1309	0.3899	0.4747	0.5331	0.5463	0.1358	0.1391	0.1343	0.1389	0.1387
		0.1289	0.1291	0.1302	0.544	0.5538	0.4383	0.5651	0.1341	0.132	0.1318	0.1323	0.1303
		0.1277	0.1258	0.1248	0.4151	0.4968	0.5064	0.5492	0.1307	0.1378	0.159	0.1373	0.3531
		0.1235	0.1275	0.1281	0.2751	0.5411	0.4547	0.6057	0.1248	0.8728	0.5669	0.8447	0.659
		0.126	0.1281	0.1289	0.4814	0.5774	0.6816	0.5942	0.6075	0.7395	0.8302	0.6388	0.7165
		0.1285	0.1296	0.1344	0.4978	0.689	0.5828	0.6462	0.673	0.6203	0.5722	0.5732	0.5354
		0.1281	0.129	0.158	0.5034	0.5103	0.5738	0.5583	0.5151	0.5313	0.5836	0.6582	0.6045
		0.1262	0.1306	0.1342	0.3963	0.4339	0.5497	0.6059	0.7186	0.599	0.6383	0.6006	0.5671
21:20:00	37.00	0.1376	0.1318	0.1305	0.4094	0.4759	0.5326	0.5469	0.1358	0.1399	0.1342	0.1395	0.1389
		0.1289	0.129	0.1302	0.5868	0.5548	0.4369	0.5662	0.134	0.1319	0.1315	0.1366	0.1297
		0.1274	0.1261	0.1246	0.4436	0.486	0.507	0.5516	0.1306	0.1412	0.168	0.1416	0.4273
		0.1236	0.1266	0.1279	0.2941	0.5343	0.4522	0.6077	0.1248	0.8425	0.5881	0.8485	0.6619
		0.1259	0.1273	0.1288	0.4868	0.5784	0.6866	0.5943	0.6073	0.7309	0.8204	0.6321	0.7132
		0.1282	0.1296	0.1351	0.4815	0.6935	0.5846	0.6461	0.6749	0.6214	0.5699	0.5747	0.5356
		0.1283	0.1289	0.1631	0.5012	0.5084	0.5737	0.561	0.5147	0.5319	0.5859	0.6588	0.6044
		0.1261	0.1306	0.1352	0.3905	0.432	0.547	0.6072	0.7209	0.6001	0.6382	0.6009	0.5674
21:30:00	37.00	0.138	0.1316	0.131	0.4407	0.4781	0.5345	0.5463	0.1358	0.1385	0.1341	0.1384	0.1391
		0.1287	0.1289	0.13	0.6047	0.5559	0.4366	0.5657	0.1342	0.132	0.1315	0.1324	0.13
		0.1274	0.1258	0.1248	0.4871	0.4776	0.5094	0.5532	0.1307	0.1422	0.1698	0.1417	0.377
		0.1238	0.1264	0.128	0.3121	0.5262	0.4513	0.6108	0.1248	0.8949	0.607	0.857	0.6975
		0.1258	0.1272	0.1289	0.4898	0.5834	0.6913	0.5949	0.6082	0.7289	0.8156	0.6322	0.7143
		0.1282	0.1295	0.1358	0.4778	0.6967	0.5868	0.6462	0.6785	0.6224	0.5704	0.5756	0.5372
		0.1282	0.1287	0.1697	0.5055	0.5101	0.573	0.5622	0.515	0.5326	0.587	0.6591	0.604
		0.1261	0.1303	0.1359	0.3896	0.432	0.5466	0.6061	0.7233	0.5998	0.6385	0.6015	0.5694
21:40:00	37.00	0.1377	0.1318	0.1308	0.4715	0.4781	0.5322	0.5469	0.1358	0.1388	0.134	0.1386	0.1376
		0.1285	0.1291	0.1301	0.6339	0.5583	0.4352	0.5662	0.1341	0.1318	0.1317	0.1322	0.1297
		0.1276	0.1258	0.1246	0.5272	0.4652	0.5099	0.5547	0.1307	0.1499	0.1866	0.1508	0.4934
		0.1237	0.1264	0.128	0.3384	0.5195	0.449	0.614	0.1262	0.8686	0.6624	0.8659	0.6954
		0.1259	0.1273	0.129	0.4935	0.5848	0.6972	0.5946	0.608	0.7219	0.8106	0.6277	0.7133
		0.1281	0.1295	0.1366	0.4806	0.7018	0.5889	0.6474	0.681	0.6253	0.569	0.5771	0.5373
		0.128	0.1287	0.1779	0.5044	0.5086	0.5725	0.5632	0.5134	0.5328	0.5877	0.6597	0.6036
		0.1261	0.1311	0.1374	0.3875	0.4307	0.5453	0.6068	0.7278	0.6001	0.6385	0.6022	0.5706
21:50:00	37.00	0.1377	0.1317	0.131	0.5093	0.4747	0.5325	0.5478	0.1358	0.1388	0.134	0.1384	0.1375
		0.1286	0.1288	0.1301	0.6455	0.5583	0.433	0.5662	0.134	0.1317	0.1314	0.1321	0.1296
		0.1272	0.1257	0.1244	0.5639	0.4586	0.513	0.5561	0.1306	0.1512	0.1907	0.1585	0.5467
		0.1235	0.1263	0.1279	0.3544	0.5135	0.4467	0.614	0.1248	0.8789	0.7001	0.8609	0.7145
		0.1258	0.1272	0.1291	0.4891	0.5882	0.7025	0.5946	0.6079	0.7161	0.8031	0.6236	0.7119
		0.1283	0.1297	0.1372	0.4753	0.7054	0.5906	0.6475	0.6828	0.6251	0.5681	0.5781	0.5381
		0.1281	0.1287	0.1855	0.5062	0.5085	0.5716	0.5647	0.5125	0.5334	0.5898	0.6603	0.6028
		0.1261	0.1306	0.1391	0.3884	0.4315	0.5441	0.6072	0.7297	0.6	0.6388	0.6024	0.5712
22:00:00	37.00	0.1385	0.1317	0.1309	0.5282	0.4732	0.5327	0.5467	0.1358	0.1386	0.134	0.1383	0.1377
		0.1283	0.1289	0.1301	0.6668	0.5608	0.4324	0.5668	0.134	0.1317	0.1317	0.1322	0.1297
		0.1272	0.1256	0.1246	0.609	0.448	0.515	0.5577	0.1293	0.1497	0.1954	0.1509	0.493
		0.1231	0.1263	0.1281	0.3858	0.5077	0.4476	0.6145	0.1249	0.8993	0.8072	0.8726	0.7949
		0.1258	0.1272	0.1295	0.4886	0.5932	0.708	0.5952	0.6084	0.7153	0.7977	0.6217	0.7125
		0.1281	0.1296	0.1385	0.4738	0.7083	0.5937	0.6483	0.6821	0.6264	0.5681	0.5797	0.539
		0.128	0.1288	0.1957	0.5129	0.5103	0.5703	0.5664	0.5126	0.5346	0.5901	0.661	0.6035
		0.126	0.1305	0.1405	0.3897	0.4308	0.5442	0.6063	0.7341	0.6008	0.6394	0.6037	0.574
22:10:00	37.00	0.1379	0.1316	0.1307	0.5305	0.4699	0.5321	0.5473	0.1358	0.1388	0.1341	0.1403	0.1379
		0.1283	0.13	0.1302	0.6753	0.5604	0.4306	0.5672	0.134	0.1318	0.1315	0.1344	0.1295
		0.127	0.1256	0.1242	0.6316	0.445	0.5151	0.5601	0.1307	0.1557	0.212	0.1623	0.6063
		0.1231	0.1262	0.1278	0.4069	0.5014	0.4439	0.6156	0.1263	0.9053	0.7711	0.8805	0.7654
		0.1258	0.1269	0.1295	0.4792	0.5925	0.7099	0.5953	0.6084	0.7095	0.7897	0.6176	0.7101
		0.1279	0.1295	0.1393	0.4685	0.7102	0.5961	0.647	0.6826	0.6268	0.5673	0.5807	0.5406
		0.128	0.1289	0.2073	0.5123	0.5082	0.5711	0.5686	0.5126	0.5358	0.5924	0.6614	0.603
		0.1258	0.1303	0.1424	0.3892	0.4309	0.5439	0.6087	0.7362	0.6019	0.6404	0.605	0.5755
22:20:00	37.00	0.1374	0.1314	0.1306	0.5233	0.4662	0.5319	0.5469	0.1356	0.1383	0.1341	0.1382	0.1379
		0.1284	0.1287	0.1303	0.6871	0.5623	0.43	0.5674	0.134	0.1318	0.1311	0.1322	0.1294
		0.1272	0.1258	0.1246	0.6312	0.4369	0.5173	0.5612	0.1305	0.1717	0.2274	0.1699	0.6635
		0.1231	0.1261	0.1277	0.4286	0.5016	0.4443	0.6153	0.1267	0.9086	0.7908	0.8757	0.7955
		0.1258	0.127	0.1296	0.4714	0.5965	0.7135	0.5951	0.6086	0.7035	0.7806	0.6142	0.7086
		0.1282	0.1295	0.141	0.4607	0.7146	0.5944	0.6479	0.6829	0.6267	0.566	0.5828	0.5401
		0.1278	0.1287	0.2173	0.5106	0.5084	0.5702	0.5701	0.5118	0.5379	0.5939	0.6627	0.6028
		0.1259	0.1303	0.145	0.3901	0.4302	0.5444	0.6087	0.7385	0.6014	0.6409	0.6066	0.5783
22:30:00	37.00	0.1377	0.1315	0.1309	0.5012	0.4649	0.5314	0.5454	0.1358	0.1383	0.1339	0.1384	0.138
		0.1281	0.1287	0.1304	0.6914	0.5628	0.4289	0.5671	0.134	0.1316	0.1314	0.1321	0.1293
		0.1271	0.1256	0.1243	0.657	0.4325	0.5192	0.5627	0.1306	0.1628	0.236	0.1621	0.6696
		0.1233	0.1262	0.1279	0.4401	0.4977	0.444	0.6136	0.1264	0.9297	0.8742	0.8768	0.8398
		0.1256	0.1268	0.1302	0.4682	0.6001	0.7163	0.5958	0.611	0.7001	0.7792	0.6141	0.7115
		0.128	0.1295	0.143	0.4618	0.7173	0.5923	0.6483	0.6857	0.6276	0.5655	0.5831	0.5418
		0.1279	0.1287	0.2317	0.5126	0.5107	0.5686	0.57	0.5109	0.5386	0.5939	0.6642	0.6024
		0.1258	0.13	0.1472	0.3927	0.4298	0.5434	0.6071	0.7416	0.603	0.6428	0.6065	0.58
22:40:00	37.00	0.1381	0.1311	0.1308	0.5112	0.4626	0.5314	0.5457	0.1354	0.1383	0.1336	0.1381	0.1373
		0.128	0.1286	0.1302	0.6865	0.5647	0.4284	0.5683	0.1339	0.1314	0.1309	0.133	0.1303
		0.1268	0.1256	0.1244	0.6612	0.4297	0.5216	0.5653	0.1305	0.1692	0.2568	0.169	0.7013
		0.1233	0.1261	0.1276	0.4594	0.4962	0.4451	0.6133	0.1264	0.9228	0.866	0.8677	0.8494
		0.1257	0.127	0.1309	0.4689	0.6018	0.718	0.5959	0.6126	0.6974	0.77	0.6125	0.708
		0.128	0.1294	0.1447	0.4663	0.7185	0.5919	0.6481	0.6866	0.6288	0.566	0.5843	0.5424
		0.1278	0.1295	0.2474	0.5164	0.512	0.5684	0.5723	0.5115	0.5417	0.597	0.6645	0.6038
		0.1258	0.1301	0.1508	0.3924	0.429	0.5445	0.6094	0.7424	0.6058	0.6454	0.6103	0.5844
22:50:00	37.00	0.1369	0.1313	0.1309	0.5158	0.4608	0.5304	0.5445	0.1357	0.1392	0.1339	0.1385	0.1373
		0.1282	0.1286	0.1304	0.6823	0.564	0.4274	0.5675	0.134	0.1313	0.1312	0.1323	0.1291
		0.127	0.1255	0.1245	0.6937	0.4264	0.5225	0.5655	0.1292	0.1753	0.2791	0.1758	0.7145
		0.123	0.126	0.1278	0.4745	0.4946	0.443	0.6119	0.1251	0.9246	0.8988	0.8724	0.8714
		0.1256	0.1267	0.1309	0.4639	0.6036	0.7212	0.5965	0.6141	0.6923	0.7696	0.6114	0.7099
		0.1279	0.1295	0.1476	0.4651	0.7219	0.5918	0.6497	0.6908	0.6301	0.565	0.5858	0.5432
		0.1276	0.1286	0.2665	0.5181	0.5113	0.5674	0.5724	0.5125	0.5429	0.5985	0.6667	0.6031
		0.1256	0.1302	0.1548	0.3926	0.4292	0.5432	0.6087	0.7442	0.6081	0.648	0.6113	0.5873
23:00:00	37.00	0.1373	0.1312	0.1309	0.4853	0.457	0.5299	0.5434	0.1356	0.1381	0.1335	0.138	0.1377
		0.128	0.1284	0.1305	0.6698	0.564	0.4267	0.5683	0.1341	0.1311	0.1311	0.1329	0.1293
		0.127	0.1255	0.1244	0.6469	0.4216	0.523	0.5678	0.1293	0.1827	0.2935	0.1827	0.7036
		0.123	0.1261	0.1277	0.4864	0.4955	0.4438	0.6122	0.1254	0.9255	0.9094	0.8694	0.8764
		0.1255	0.1269	0.1315	0.4582	0.6062	0.7206	0.5978	0.6137	0.6881	0.7641	0.6082	0.7078
		0.1277	0.1293	0.1508	0.4636	0.7237	0.5937	0.6508	0.6924	0.6289	0.5638	0.5873	0.5432
		0.1275	0.1286	0.2858	0.5203	0.5114	0.5661	0.5738	0.5116	0.5456	0.6008	0.6683	0.6034
		0.1256	0.1304	0.158	0.3946	0.4279	0.5434	0.6098	0.7463	0.6089	0.6508	0.6147	0.5916
23:10:00	37.00	0.1365	0.131	0.1312	0.4787	0.4567	0.5276	0.5415	0.1357	0.1382	0.1333	0.1377	0.1374
		0.1279	0.1285	0.1305	0.6671	0.5653	0.4256	0.5675	0.1339	0.1312	0.1311	0.1327	0.1289
		0.1268	0.1255	0.1243	0.6359	0.4216	0.5237	0.5695	0.1305	0.1928	0.3151	0.1902	0.7264
		0.123	0.126	0.1278	0.5077	0.4974	0.4421	0.6123	0.125	0.9311	0.8897	0.8671	0.8877
		0.1253	0.1268	0.1321	0.456	0.6075	0.7212	0.5991	0.6144	0.6848	0.7602	0.6074	0.708
		0.1277	0.1292	0.1551	0.4654	0.725	0.5916	0.6535	0.696	0.6261	0.5626	0.5887	0.5448
		0.1276	0.1285	0.3076	0.5221	0.5117	0.5655	0.5747	0.51	0.5477	0.6035	0.6708	0.605
		0.1255	0.1301	0.1632	0.3974	0.4267	0.5416	0.6095	0.7481	0.6103	0.6524	0.6164	0.5962
23:20:00	37.00	0.1369	0.1309	0.1312	0.4732	0.454	0.5282	0.5414	0.1356	0.1379	0.1335	0.1381	0.1376
		0.1278	0.1283	0.1303	0.6576	0.5681	0.4253	0.5691	0.134	0.131	0.1309	0.1318	0.129
		0.1271	0.1255	0.1242	0.6291	0.4188	0.5256	0.5739	0.1306	0.2034	0.3379	0.1977	0.7449
		0.1229	0.1258	0.1276	0.5178	0.4955	0.4424	0.6145	0.125	0.9287	0.9025	0.8577	0.8978
		0.1255	0.1268	0.1325	0.4521	0.6105	0.7196	0.6012	0.6161	0.6834	0.753	0.6054	0.705
		0.1276	0.1293	0.1599	0.4687	0.7265	0.5902	0.6541	0.698	0.6261	0.5627	0.591	0.5483
		0.1275	0.1284	0.3271	0.5257	0.5128	0.5653	0.5777	0.5096	0.553	0.6053	0.6737	0.6072
		0.1254	0.1299	0.1691	0.3949	0.4258	0.5434	0.6122	0.7484	0.613	0.6544	0.6189	0.6032
23:30:00	37.00	0.1367	0.1313	0.1313	0.455	0.453	0.5255	0.5393	0.1356	0.138	0.1332	0.1381	0.1382
		0.1277	0.1283	0.1306	0.6668	0.5714	0.4203	0.5699	0.1339	0.1309	0.1313	0.133	0.1308
		0.1268	0.1251	0.1243	0.6271	0.4157	0.5269	0.576	0.1306	0.2144	0.3593	0.2081	0.7799
		0.1227	0.1257	0.1279	0.5135	0.4963	0.4401	0.6149	0.1266	0.9387	0.9376	0.8624	0.9084
		0.1253	0.1266	0.1339	0.4505	0.6128	0.7238	0.6008	0.6177	0.682	0.7541	0.6061	0.708
		0.1274	0.1291	0.1652	0.4739	0.7292	0.5869	0.6572	0.7015	0.627	0.5621	0.5926	0.549
		0.1278	0.1286	0.3562	0.5282	0.5128	0.5644	0.5788	0.5086	0.5553	0.6058	0.6763	0.6084
		0.1255	0.1298	0.1766	0.3953	0.424	0.5414	0.6116	0.7517	0.6139	0.6564	0.6191	0.6077
23:40:00	37.00	0.1365	0.131	0.1314	0.4505	0.4504	0.5264	0.5384	0.1356	0.138	0.133	0.138	0.1431
		0.1272	0.1282	0.1305	0.663	0.5722	0.4209	0.5712	0.1339	0.131	0.1308	0.1327	0.1309
		0.1269	0.1253	0.1242	0.6273	0.4144	0.5278	0.579	0.1306	0.2234	0.3745	0.2177	0.8011
		0.1226	0.1255	0.1277	0.5005	0.4976	0.4416	0.6156	0.125	0.9326	0.9361	0.8539	0.9102
		0.125	0.1266	0.1349	0.4445	0.615	0.723	0.6014	0.6201	0.6772	0.7474	0.6043	0.706
		0.1273	0.129	0.1711	0.4726	0.7299	0.5873	0.6577	0.7035	0.6283	0.5619	0.594	0.5496
		0.1275	0.1284	0.3802	0.5322	0.5136	0.5637	0.5813	0.5083	0.5609	0.6078	0.6772	0.6087
		0.1253	0.1299	0.1833	0.396	0.4231	0.5429	0.6138	0.7521	0.6175	0.6584	0.6224	0.6125
23:50:00	37.00	0.1375	0.131	0.1317	0.4419	0.4507	0.5259	0.538	0.1357	0.1378	0.1331	0.1378	0.1441
		0.1274	0.1283	0.1307	0.6589	0.5726	0.4206	0.573	0.1339	0.131	0.1306	0.1316	0.1291
		0.1265	0.1251	0.124	0.6133	0.4134	0.5295	0.5808	0.1306	0.2255	0.4012	0.2295	0.8177
		0.1226	0.1256	0.1274	0.4921	0.5005	0.4417	0.617	0.1249	0.9269	0.9407	0.8483	0.908
		0.1252	0.1268	0.1362	0.4382	0.616	0.7226	0.6021	0.6212	0.674	0.742	0.6013	0.7048
		0.1273	0.1292	0.1783	0.4745	0.7297	0.5863	0.6579	0.7059	0.6269	0.5613	0.5934	0.5509
		0.1275	0.1284	0.3993	0.5323	0.5141	0.5638	0.5833	0.5086	0.5651	0.6103	0.6755	0.6105
		0.1254	0.1297	0.1913	0.3961	0.4223	0.5435	0.6174	0.7499	0.6197	0.6612	0.6251	0.6176
24:00:00	37.00	0.1367	0.1309	0.1318	0.4379	0.4488	0.5245	0.5362	0.1355	0.1376	0.133	0.1475	0.1441
		0.1275	0.128	0.1307	0.656	0.5699	0.42	0.5733	0.1338	0.1309	0.1304	0.1314	0.1289
		0.1265	0.125	0.1239	0.6088	0.4127	0.5296	0.5808	0.1304	0.2372	0.4273	0.2394	0.8082
		0.1226	0.1256	0.1276	0.4872	0.5037	0.4429	0.6178	0.125	0.9222	0.9406	0.8463	0.9034
		0.1251	0.1267	0.1374	0.4341	0.6165	0.7238	0.6019	0.6209	0.6706	0.7328	0.5978	0.7029
		0.1273	0.1289	0.1865	0.4733	0.7312	0.5864	0.6578	0.7064	0.6234	0.5612	0.5929	0.5499
		0.1272	0.1284	0.4177	0.5322	0.5138	0.5633	0.5839	0.5082	0.5683	0.6126	0.673	0.6118
		0.1255	0.1301	0.2	0.3986	0.4207	0.5444	0.6197	0.7464	0.6222	0.6614	0.6282	0.6224
~End

## Sheet: S.Enteritidis-citral
PlateFormat 96wells		Wells
		A1	A2	A3	A4	A5	A6	A7	A8	A9	A10	A11	A12
		B1	B2	B3	B4	B5	B6	B7	B8	B9	B10	B11	B12
		C1	C2	C3	C4	C5	C6	C7	C8	C9	C10	C11	C12
		D1	D2	D3	D4	D5	D6	D7	D8	D9	D10	D11	D12
		E1	E2	E3	E4	E5	E6	E7	E8	E9	E10	E11	E12
		F1	F2	F3	F4	F5	F6	F7	F8	F9	F10	F11	F12
		G1	G2	G3	G4	G5	G6	G7	G8	G9	G10	G11	G12
		H1	H2	H3	H4	H5	H6	H7	H8	H9	H10	H11	H12
PlateFormat 96wells		Concentration of citral in each well (%v/v) (4 replicates)
		1	0.5	0.25	0.125	0.0625	0.03125	0.015625	0	0.6	0.6	0.6	0.6
		1	0.5	0.25	0.125	0.0625	0.03125	0.015625	0	0.3	0.3	0.3	0.3
		1	0.5	0.25	0.125	0.0625	0.03125	0.015625	0	0.15	0.15	0.15	0.15
		1	0.5	0.26	0.125	0.0625	0.03125	0.015625	0	0.075	0.075	0.075	0.075
		0.8	0.4	0.2	0.1	0.05	0.025	0.0125	0	0.0375	0.0375	0.0375	0.0375
		0.8	0.4	0.2	0.1	0.05	0.025	0.0125	0	0.01875	0.01875	0.01875	0.01875
[truncated: 1,182 more rows]

## Sheet: S.typhimurium-citral
PlateFormat 96wells		Wells
[truncated: 1,197 more rows]

## Sheet: E.coli-citral
PlateFormat 96wells		Wells
[truncated: 1,197 more rows]

[truncated: 12 more sheets: S.epiderm.-citral, S.aureus-citral, L.mono.-citral, P.fragi-citral, S.Enteritidis-ciproxin, S.typhimurium-ciproxin, E.coli-ciproxin, S.epiderm.-ciproxin, S.aureus-ciproxin, L.mono.-ciproxin, P.fragi-ciproxin, Φύλλο1]
